# Supplementary material
Source: MDPI journal article supplement (https://www.mdpi.com/2311-7524/7/6/143)
Supplement: s1 [file s1]

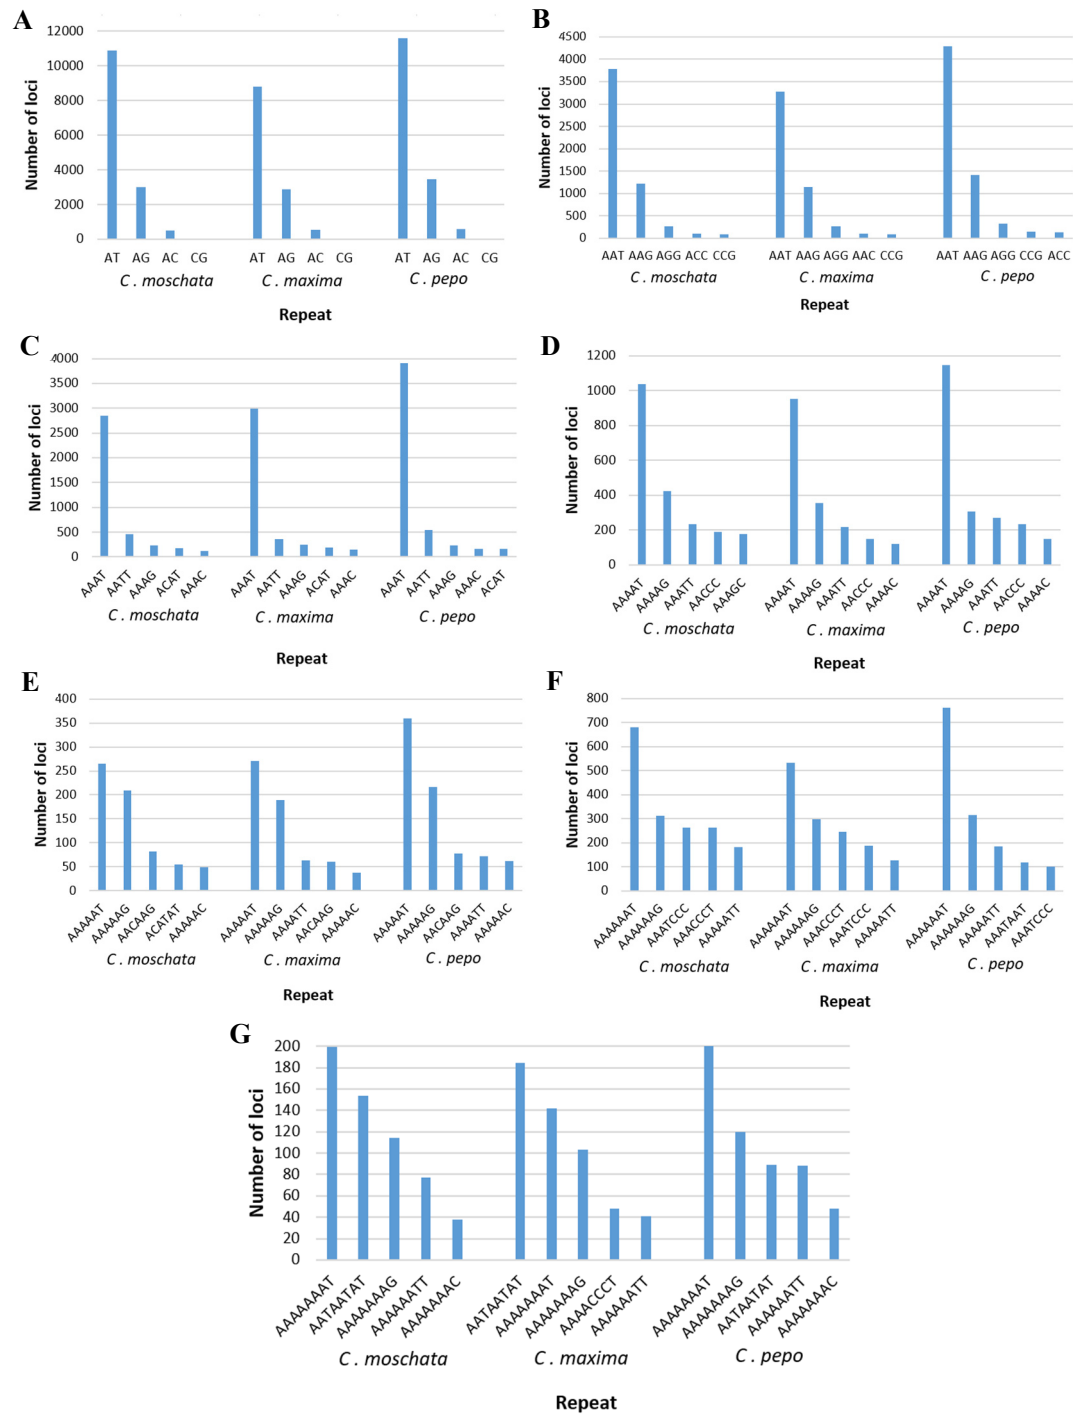

**Figure S1.** The top five types of each SSR repeat motif and their frequencies in *C. moschata*, *C. maxima*, and *C. pepo*, respectively. Dinucleotides (A), trinucleotides (B), tetranucleotides (C), pentanucleotides (D), hexanucleotides (E), heptanucleotides (F), and octanucleotides (G).

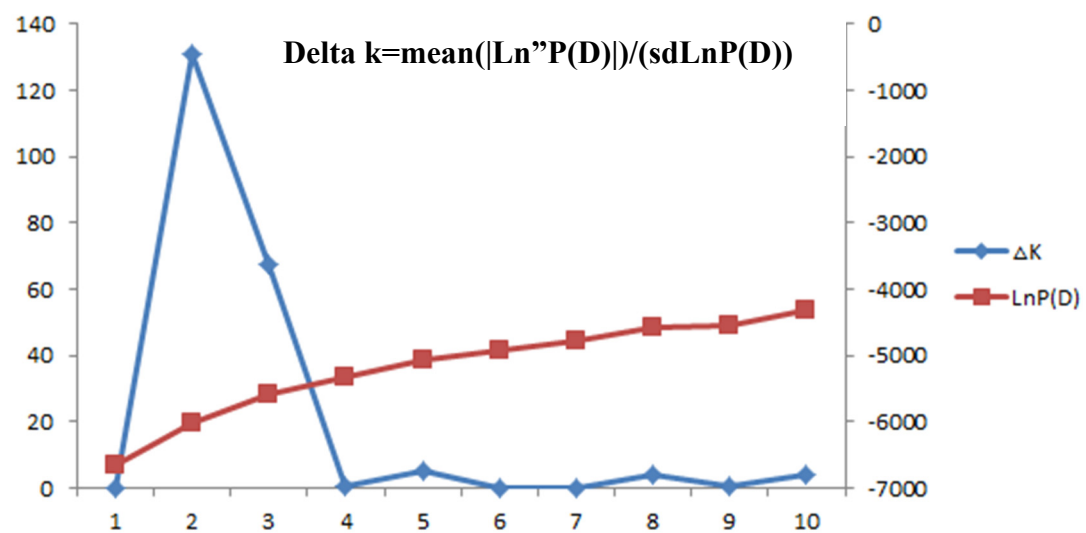

**Figure S2.** The optimal K-values analysis by using Structure Harvester.
