# Supplementary material
Source: MDPI journal article supplement (https://www.mdpi.com/2311-7524/7/6/143)
Supplement: s1 [file s1 › Supplementary Tables.xlsx]

## Sheet: Table S1
Table S1. The list of the C. pepo introduction accessions
Code Name	Accession Name	Taxonomy	Origin	City
1	V05B0316	Cucurbita pepo	China	Xiangtan County, Hunan Province
2	V05B0377	Cucurbita pepo	China	Urumqi County, Xinjiang Province
3	V05B0373	Cucurbita pepo	China	Urumqi County, Xinjiang Province
4	V05B0370	Cucurbita pepo	China	Manas County, Xinjiang Province
5	V05B0325	Cucurbita pepo	China	Jingdezhen city, Jiangxi Province
6	V05B0318	Cucurbita pepo	China	Changchun city, Jilin Province
7	V05B0298	Cucurbita pepo	China	Lingshou County, Hebei province
8	V05B0262	Cucurbita pepo	China	Lixian county, Gansu province
9	V05B0266	Cucurbita pepo	China	Zhengning county, Gansu province
10	V05B0372	Cucurbita pepo	America	unknown
11	V05B0380	Cucurbita pepo	China	Shihezi City, Xinjiang Province
12	V05B0317	Cucurbita pepo	China	Chenzhou, Hunan Province
13	V05B0308	Cucurbita pepo	China	Northeast Agricultural College
14	V05B0365	Cucurbita pepo	China	Changwu County, Shaanxi province
15	V05B0355	Cucurbita pepo	China	Ziyang County, Shaanxi Province
16	V05B0366	Cucurbita pepo	China	Mizhi County, Shaanxi province
17	V05B0326	Cucurbita pepo	China	Bayanhot, Inner Mongolia
18	V05B0375	Cucurbita pepo	China	Tacheng city, Xinjiang Province
19	V05B0274	Cucurbita pepo	China	Linxia city, Gansu Province
20	V05B0272	Cucurbita pepo	China	Pingliang City, Gansu Province
21	V05B0304	Cucurbita pepo	China	Baiquan County, Heilongjiang Province
22	V05B0309	Cucurbita pepo	China	Boli County, Heilongjiang province
23	V05B0259	Cucurbita pepo	China	Chengdu city, Sichuan province
24	V05B0288	Cucurbita pepo	China	Chengde city, Hebei Province
25	V05B0311	Cucurbita pepo	China	Hubei Shennongjia Forest area
26	V05B0290	Cucurbita pepo	China	Hebei Vegetable Research Institute
27	V05B0294	Cucurbita pepo	China	Hebei Vegetable Research Institute
28	V05B0297	Cucurbita pepo	China	Wen 'an County, Hebei Province
29	V05B0348	Cucurbita pepo	China	Ankang County, Shaanxi Province
30	V05B0353	Cucurbita pepo	China	Jingbian County, Shaanxi Province
31	V05B0350	Cucurbita pepo	China	Mizhi County, Shaanxi province
32	V05B0321	Cucurbita pepo	Russia	unknown
33	V05B0320	Cucurbita pepo	Russia	unknown
34	V05B0308	Cucurbita pepo	China	Northeast Agricultural College
35	V05B0384	Cucurbita pepo	China	Dali City, Yunnan Province
36	V05B0279	Cucurbita pepo	China	Xian County, Hebei Province
37	V05B0281	Cucurbita pepo	China	Xian County, Hebei Province
38	V05B0284	Cucurbita pepo	China	Hebei Institute of Vegetables
39	V05B0301	Cucurbita pepo	China	Zhumadian City, Henan Province
40	V05B0302	Cucurbita pepo	China	Zhoukou City, Henan Province
41	V05B0332	Cucurbita pepo	Russia	unknown
42	V05B0331	Cucurbita pepo	Russia	unknown
43	V05B0329	Cucurbita pepo	China	Yinchuan city, Ningxia Province
44	V05B0268	Cucurbita pepo	China	Minle County, Gansu Province
45	V05B0270	Cucurbita pepo	China	Linxia City, Gansu Province
46	V05B0373	Cucurbita pepo	China	Urumqi County, Xinjiang Province
47	V05B0382	Cucurbita pepo	China	Songming City, Yunnan Province
48	V05B0381	Cucurbita pepo	China	Kunming city, Yunnan Province
49	V05B0324	Cucurbita pepo	China	Dalian city, Liaoning Province
50	V05B0323	Cucurbita pepo	China	Shenyang city, Liaoning province
51	V05B0337	Cucurbita pepo	China	Jiaocheng County, Shanxi Province
52	V05B0340	Cucurbita pepo	China	Hun Yuan County, Shanxi Province
53	V05B0305	Cucurbita pepo	China	Heilongjiang Institute of Horticulture
54	V05B0307	Cucurbita pepo	China	Heilongjiang Institute of Horticulture
55	V05B0322	Cucurbita pepo	China	Sihong County, Jiangsu Province
56	V05B0275	Cucurbita pepo	China	Kangle County, Gansu Province
57	V05B0310	Cucurbita pepo	China	Hubei Shennongjia Forest area
58	V05B0386	Cucurbita pepo	China	Fangxian County, Hubei Province
59	V05B0328	Cucurbita pepo	China	Yinchuan city, Ningxia Province
60	V05B0387	Cucurbita pepo	China	Yangyuan County, Hebei Province
61	V05B0385	Cucurbita pepo	China	Yangyuan County, Hebei Province

## Sheet: Table S2
Table S2. The distribution of different nucleotide repeats in the genome of three Cucurbita species.
	Origins	Motif length	Number of loci identified	Frequency	mean repeat number	Number of loci primer designed	Percentage of SSRs suitable for primer design (%)
				(%)
	C. moschata	di-	14362	41.78	14.16	11522	80.23
		tri-	5834	16.97	9.31	5134	88
		tetra-	4253	12.37	5.62	3746	88.08
		penta-	3380	9.83	4.42	3124	92.43
		hexa-	1922	5.59	4.53	1818	94.59
		hepta-	3325	9.67	3.99	2661	80.03
		octa-	1299	3.78	3.22	1128	86.84
		Total	34375	100	—	29133	84.75
	C. maxima	di-	12201	39.9	14.18	11264	92.32
		tri-	5257	17.19	8.93	5117	97.34
		tetra-	4340	14.19	5.8	4218	97.19
		penta-	2960	9.68	4.51	2889	97.6
		hexa-	1833	5.99	4.48	1813	98.91
		hepta-	2836	9.27	3.88	2549	89.88
		octa-	1150	3.76	3.38	1055	91.74
		Total	30577	100	—	28905	94.53
	C. pepo	di-	15626	41.01	13.83	14489	92.72
		tri-	6814	17.88	9.13	6578	96.54
		tetra-	5523	14.49	5.83	5293	95.84
		penta-	3535	9.28	4.59	3457	97.79
		hexa-	2247	5.9	4.53	2204	98.09
		hepta-	3071	8.06	3.24	2981	97.07
		octa-	1288	3.38	3.15	1232	95.65
		Total	38104	100	—	36234	95.09

## Sheet: Table S3
	Table S3. The distribution of SSR loci on different chromosomes in C. moschata, C. maxima and C. pepo.
		C. moschata			C. maxima			C. pepo
		Chr.Size	Number of	Density	Chr.Size	Number of	Density	Chr.Size	Number of	Density
		(Mb)	SSR loci	(SSRs/Mb)	(Mb)	SSR loci	(SSRs/Mb)	(Mb)	SSR loci	(SSRs/Mb)
	Chr01	11.7	2139	182.82	13.08	1771	135.4	21.32	3270	153.38
	Chr02	8.42	1668	198.1	10.11	1554	153.71	11.5	2229	193.83
	Chr03	8.66	1470	169.75	9.43	1333	141.36	11.02	2379	215.88
	Chr04	17.49	3058	174.84	19.84	2538	127.92	10.17	1987	195.38
	Chr05	8.76	1617	184.59	10.61	1360	128.18	8.69	1913	220.14
	Chr06	9.58	1700	177.45	10.75	1155	107.44	8.54	1473	172.48
	Chr07	6.59	1248	189.38	7.93	1013	127.74	8.12	1663	204.8
	Chr08	6.4	1184	185	7.92	1182	149.24	8.05	1814	225.34
	Chr09	9.75	1497	153.54	9.17	1127	122.9	7.94	1516	190.93
	Chr10	10.51	1660	157.94	8.85	877	99.1	7.87	1511	191.99
	Chr11	11.2	1990	177.68	12.97	1646	126.91	7.87	1711	217.41
	Chr12	9.4	1659	176.49	10.18	1313	128.98	7.86	1578	200.76
	Chr13	7.62	1147	150.52	8.51	889	104.47	7.48	1506	201.34
	Chr14	12.71	2191	172.38	14.87	2010	135.17	7.16	1525	212.99
	Chr15	8.28	1531	184.9	9.18	1230	133.99	7.05	1298	184.11
	Chr16	7.61	1371	180.16	9.82	1217	123.93	6.95	1269	182.59
	Chr17	8.61	1447	168.06	9.5	1297	136.53	6.94	1491	214.84
	Chr18	10.34	1571	151.93	10.26	1311	127.78	6.67	1340	200.9
	Chr19	7.8	1252	160.51	9.31	1019	109.45	6.6	1389	210.45
	Chr20	9.44	1247	132.1	9.29	1110	119.48	6.5	1132	174.15

## Sheet: Table S4
Table S4. The identificated SSR markers in C. moschata
Primer ID	SSR type	SSR motif	Chromosome	Physical position	Forward	Tm	Reverse	Tm	Expected_Sequence
CmoSSR00001	c*	(CCCTAAAA)3accctaa(AAACCCT)5(AAACCCTA)3*	Cmo_Chr01	1961..3049	AAACCCTAAACCCTAAACCCC	59.49	GTAGAAAAACCCCTTCCCCA	60.16	AAACCCTAAACCCTAAACCCCTAAAACCCCTAAAACCCTAAAACCCTAAAAACCCTAAAAACCCTAAACCCTAAACCCTAAACCCTAAACCCTAAAACCCTAAAACCCTAAACCCCTAAACCCCTAAACCCTAAACGCAGAGCGACTCTCAACAAGGACGTTGAGACTTTGAAAATAGAAATCTGTTGGGCTTAATCCGCACTAAAGATCAAGGAGTACAAGTGTACTCCGGATAATATGGGGAAGGGGTTTTTCTAC
CmoSSR00002	c*	(AG)9(GAGAGG)4*	Cmo_Chr01	14687..15729	TGCCAAACCAACAAAATCAA	59.95	CCCATTTCCATAGCAGAGGA	60.03	TGCCAAACCAACAAAATCAAATAAAATATGCTGAATCGAGAAGAAAGAGAGAGAAAGTGAGAGGTGGGATGTGTCCTCCGAGCTGAATAGTTAAACCAGGATTGTTGTTTTGCTTCACCTTTATACTCCGTTTGGTGGTTTTTGCCGGGCCAGACAACCTACCAGTTGTTGCGGCTCTTTGAAGAGAGAGAAATTCTTTTTATACATACTCACAACTCAAACTCACGCTCAGAGAGAGAGAGAGAGAGGGAGAGGGAGAGGGAGAGGGAGAGAGAGATCATCCTCTGCTATGGAAATGGG
CmoSSR00003	p7	(TTCTTTT)3	Cmo_Chr01	19191..20217	GAAAGTTGGGGAACCAATGA	59.77	GCTCGCTCGCTATCTGACTT	59.89	GAAAGTTGGGGAACCAATGATATTTGTACATGAAATTCCCAATTGTCCTTAATTATAAATACCAAAATATAATTACTTTATCTCGTCGGATTTTAGAGACACTGAATACCGATGGTTTTCAGTAGTTAGAGAATCAAAAAAAAAAATTCTTTTTTCTTTTTTCTTTTTGACAAAACCCAGAGGGAGAGGGAGAGGGAGAGGGAGAGCGACGGAAGTCAGATAGCGAGCGAGC
CmoSSR00004	p6	(AGAGGG)4	Cmo_Chr01	19223..20252	GAAAGTTGGGGAACCAATGA	59.77	GCTCGCTCGCTATCTGACTT	59.89	GAAAGTTGGGGAACCAATGATATTTGTACATGAAATTCCCAATTGTCCTTAATTATAAATACCAAAATATAATTACTTTATCTCGTCGGATTTTAGAGACACTGAATACCGATGGTTTTCAGTAGTTAGAGAATCAAAAAAAAAAATTCTTTTTTCTTTTTTCTTTTTGACAAAACCCAGAGGGAGAGGGAGAGGGAGAGGGAGAGCGACGGAAGTCAGATAGCGAGCGAGC
CmoSSR00005	p3	(TAA)7	Cmo_Chr01	39528..40554	TGTGGCCCATTGTTTGATAA	59.79	AGTATTAGCATGGCACCGGA	60.49	TGTGGCCCATTGTTTGATAATGGGCTGTCCCATAAAAGCCCATATGATTCTTGTACGAGGAAGTCATCTATTTCCATCCGGTTGCCACGTGTTAAATTCTTTAATAATAATAATAATAATAAATTATTGATTTGGAAATTAATATTGGGTAATTAAAAGTAAATAAAAGAATGGCCTAGAACGTTCCGGTGCCATGCTAATACT
CmoSSR00006	p2	(CT)13	Cmo_Chr01	50698..51729	ACGTATAACACACCCAGCCC	59.74	ATGCAAAGAGGATGTACCCG	59.96	ACGTATAACACACCCAGCCCAAACATTACGACCCATTATTATTTATCAATCAATTCTGTTGCTTTAATTTCCACAGATGTGCCAAGATTGAAGATAGGATTAGAGCTCTCTCTCTCTCTCTCTCTCTCTCTCGATATATATATATATATAATGAAAATATCCAAATACAAATGAGAAAAGGCAAGCTTAGTATTTACAGAAAAAAAAAAGAGAAAAAAAAACCCTTTTCGGGTACATCCTCTTTGCAT
CmoSSR00007	p5	(CACCC)4	Cmo_Chr01	52008..53033	ATATGGCTTTGCAGCTTGGT	59.74	CCTACCATGATGCTGACGTG	60.14	ATATGGCTTTGCAGCTTGGTTTCTTGAGCCTATCAATTGAGTCGAGGAAGAAGGCTCACCCCACCCCACCCCACCCCAGCCGACAACACAGATACAAATCCGACCATTCATTTTTATTTTATTTTACACGTCATTACATAACATTACACACTTGACACCATCCAATTTATTAAAAAAATATTTGCAAAATTATTTAAGAGCTCGGTCCCGCACACGTCAGCATCATGGTAGG
CmoSSR00008	p2	(AT)21	Cmo_Chr01	52203..53250	CACGTCAGCATCATGGTAGG	60.14	CCGCTTGTGATTTCACTATTTG	59.65	CACGTCAGCATCATGGTAGGAATATAATTTTAACGTTGAATATATATATATATATATATATATATATATATATATATATATTTTATATATATATATAAAGACCTGTTCAAACATCATATCAATTATCAAGTTTTTTTTATATCAGAAAATATTTAAGTTTAATAAATATATGAGATATGTGTGACATATAAGTTCAACCTCTAACTACTTGCAAACAAATCAAATTTATCCTTTAATCACATTAAACCATTTCTATGGTCACACATTACTTCAAACTCAAATAGTGAAATCACAAGCGG
CmoSSR00009	p2	(TA)9	Cmo_Chr01	52748..53771	GGTCTCATTCAGAGTTTTGAAGGTAT	60.28	TTGAACCAACAAAGAAGGGG	59.94	GGTCTCATTCAGAGTTTTGAAGGTATTTTTTAATTTATATATATATATATATAAATTAACGTGTAAATTTGTAAATAAAGAATCTGTTTTTAAAAAATAAAACTCGGCCCCGATTTATAACTAACCCAGCCCAATTTATTCTGGATGCCAATTTGGAAAATACTTTGCAACTCTTTGTTCCGGCCGAAAGAAAGAAACCTAGAGAAGCCCTAGCCCCTCCTGTTCTGTTCACAGGCCCCTTCTTTGTTGGTTCAA
CmoSSR00010	p3	(GAA)8	Cmo_Chr01	57196..58225	CAGCGTCCAAGAAAGAGTCC	59.99	TGGTCATTAATGGCGACTCA	60.07	CAGCGTCCAAGAAAGAGTCCCCAAAGATGAAGAAAGCAGCATGCTTTTCAGGCACAACATTGAATTCAACTTCAGCGAAGCAATATATGGAAATGAAGTTGAAGAAGAAGAAGAAGAAGAAGAAGATCAGAAGCAACTCAATTAGTTGACCACGCCAAGTGCTTTGAGTCGCCATTAATGACCA
CmoSSR00011	p2	(AT)12	Cmo_Chr01	63877..64906	CCGCAATGCATTACTTTCTG	59.33	GCCCTAAAAGGGCTATTGCT	59.72	CCGCAATGCATTACTTTCTGTGGTGGAGAGGTACTTTACATACTTGAAGGCTTTTCCCTACTTGCTATTAGACGGACTAGAATTGTGTTGTTTTAGGTGTCTATTTACCCTTCTTCATGGATTCAAAATACTTATCTTGACATTTAGTTTAGGATAAAAGCTGCTTTGTGATTTTCATATATATATATATATATATATATTGTGCTTCTTATACTAGCTCACATTACTGTGGAAGTTGTTGTGGGTAGTGTTTTTAAGAATGTAAAGCAAGTTAAAGAGCAATAGCCCTTTTAGGGC
CmoSSR00012	p2	(TC)18	Cmo_Chr01	88271..89312	GGCCTTGGAAAGGTCTCTCT	59.82	TATTCTTTGTTCGCATGGCA	60.22	GGCCTTGGAAAGGTCTCTCTTTTACCACTGTTGCCACTTATTTTGTCTCTCTCTCTCTCTCTCTCTCTCTCTCTCTCTCTCGGGTTAAATTTTGATTTTACCATGTTTCTGCTTTTTCGTGAATAGAAAATGGGTTGGTAGAATATTTTATTTCTACCGTTGATTCTGACGGGTGGGCTATTGGAAATAAATAATTCCAAGAAGCAGTCACGCGAGGAGGATTACCAGCTCGAGTGTCTGCCATGCGAACAAAGAATA
CmoSSR00013	p2	(TA)9	Cmo_Chr01	93507..94530	AGAATGGTGCGAAGCCTAGA	59.98	ACGGTTGAACACGGAAAGTT	59.5	AGAATGGTGCGAAGCCTAGAAGCCTAGCGTGTGTGTATATATATATATATATATCACTAAATGACATGTCAAATGCTAAATGAAAAGAGTTTGTACTGTGGTAGTACTAGAAACTTTCCGTGTTCAACCGT
CmoSSR00014	p2	(GA)9	Cmo_Chr01	98430..99453	GGAAAGGGGAAAACCAAAAA	60.14	CTCCAACTCCACTGGTTCGT	60.15	GGAAAGGGGAAAACCAAAAACAAAAATGAAACGAGGGAGAGAGAGAGAGAGAGAAGGAAGACCGTCCTATCTCTTGGTTTTTCTTCTCTCTCTTTATTCTTTTTTTACTTTTGGGGTTAACGGAAAGAAATTTATATATAATATATATATTAGATCGAGGGAATCATATAAATATTATGGAGAAGGACGGGGCGACGCGTGGGGAAGGAGCGTAAACAACACGAACCAGTGGAGTTGGAG
CmoSSR00015	p3	(GAG)10	Cmo_Chr01	118017..119052	AGTGGAGATTTCCGATGACG	60.07	AAATATTTGACGACGCCCAG	59.96	AGTGGAGATTTCCGATGACGGGCCAAGGCTTGGGTCCCGGCGGGAGATTTGGACGGCGGAGACGGCGGGAGAGGAGGAGGAGGAGGAGGAGGAGGAGGAGGATGGCGAGAGTGGGCATCCCTGCTGGTGCGTGAGAAAGCCAGGAAGAAACATCCATTGGGCGATTTGATGATGGTGGTGAGGCAATGGAAGGGGTATTAGTAAGCATGGATATCCCAATTGTGTGAATAAATTGAGTGGCTGCAACTTATCTGGGCGTCGTCAAATATTT
CmoSSR00016	p7	(CAATAGC)3	Cmo_Chr01	118780..119806	TTACCCAGCACCCTTGAGAT	59.55	ATTGTGTGCGTGTGTGTGTG	60.12	TTACCCAGCACCCTTGAGATGTTGCTAGTTTATTATTATTATTATTATTTTTAAGTCCGCATTAAAATATATTTTATTATTAAAATTCTAACTATTTTATAATAGAGTATTAGAAATCAAACTTTTTTTCCCCCTAAAAAAACGAAACATTAGAAAAGAATTTTAGGAGGGAACATCCAAAAGAGGAAGAAAATAATATTTTATGAGGGAAAATTTTAAAAAACAAAAAAGTACAATAGCCAATAGCCAATAGCATCCACACACACACACACGCACACAAT
CmoSSR00017	p5	(AAAGA)5	Cmo_Chr01	124126..125156	TGATTTGCAAAGATTGCAGC	59.96	CTAGCCCCAAGATGCTTCAG	59.97	TGATTTGCAAAGATTGCAGCAAAAGGAAAAGAGAGACAACTTCTAAAACAAGCAAACTTTAATCTCTTTATGAAGCCAAGCCAAGCCAAACCAAACCAAAACCCCACTTGAGAGAAAGAAAAGAAAAGAAAAGAAAAGAACAGAAAAGGGAGTCGGTCAGGTCACTGAGTCAGTTCTGAAGCATCTTGGGGCTAG
CmoSSR00018	p2	(GA)21	Cmo_Chr01	125233..126280	AGAAGCAATGAAGGCAGAGG	59.57	TTGAAAGGCAGAGAGGAGGA	60.07	AGAAGCAATGAAGGCAGAGGCAGAACCCAACAGAGGAGTAGTCATATAAACTGCAGACTGCAACTGAGAGAGAGAGAGAGAGAGAGAGAGAGAGAGAGAGAGAGAGAAAGAGAGATATAGGGTATCAGTAAGGCATCATTTGACAGGAACAAGCTTTTGCGACCCATGGATTTTGCAGAAATACCCATTCAAAAACTTGCTGCCCCCAACAACATACCCTCCTCCTCTCTGCCTTTCAA
CmoSSR00019	c	(TG)14cgcg(TC)10	Cmo_Chr01	131240..132297	TCCAGTGTGGGATTGACTGA	60.09	GTTGAAGTCCGCGTAAGCTC	60.02	TCCAGTGTGGGATTGACTGAGTCACAGTGGTGTGTTTCTTTTGTTCTTCGTCCGATCTGTGTGTGTGTGTGTGTGTGTGTGTGTGCGCGTCTCTCTCTCTCTCTCTCTCTGTGTCTCACCTTGTGAGGGGGAGGGGGAGGGAGAGAGAAAAAAGGAGGCAAAATAAGATGGGGTTGAAGGCGGGGAAGAGAGAGAGCTTACGCGGACTTCAAC
CmoSSR00020	p4	(TAAA)5	Cmo_Chr01	132803..133828	TGATTTCTTCCCATTTTGCC	59.88	ACTGGTGATAACGAGGTGCC	60	TGATTTCTTCCCATTTTGCCCCGAATCCATCTTTAAATTTCCCAACCCTGCCACTGCTTCGTACGTATATATTCTCTGGGAGCCAGAAGGAGCATGCCTTGCCAACGCATGCACCCTCCGCTGCATTGCTCTGCTTTTACTTCACACACTTGGCCAAGAATATTGTGTTATTTTGTGGGGGAGAGCGTGAGTGGACGCTCCATGAAGGCGCGTACAGGAAAATCCTAAATAAATAAATAAATAAAACAAGCCAGAGGCACGCAATTTAAGGCACCTCGTTATCACCAGT
CmoSSR00021	p2	(CA)11	Cmo_Chr01	134476..135503	TGGGACAACGTGCATAAAAA	59.97	ACATGACCCGACAGGAGTTC	59.97	TGGGACAACGTGCATAAAAAAACAACACAAACTCCATTATTAAAGTTCAACTTTTGGGTTTGCGCCATACCTTGTTACTCCTCTGTACATTGAAGCACCTCTTGAGAATCCACTGCTTTTCCTGTTCACACACACACACACACACACAAAAGGAACCTTCAAATCGCATCCCAATCCAACAAGATGCCTCGACGATGCTCCGTCGAGAACTCGACTTCAAACATAAACATTATCGGACCAAACGAAATATTACCTTCTCAAGTTGGCTACGAACTCCTGTCGGGTCATGT
CmoSSR00022	p8	(CTCTGTTC)4	Cmo_Chr01	136394..137431	GGGTTGTTTGTCTCCTCGTC	59.55	GGACCAAAAGATAGGAGCTGG	60.08	GGGTTGTTTGTCTCCTCGTCTTCATATTCTCAGACCTCTGTTTCTCTGTTCCTCTGTTCCTCTGTTCCTCTGTTCTCTGTTCTGTAATGAAATTAGCTTAACACCATTGGAATTCGTGCCCTTTCTCTATCATTTTCTTTCCTTACCCTACTAAATCATTTTTTTGCTATTTTACCCCTTTATTTTCCTATAATTAAGAGGTTGTTTCCAACACTTGTTACCAACCAGCTCCTATCTTTTGGTCC
CmoSSR00023	p3	(TAA)8	Cmo_Chr01	137932..138961	TCATCTTTTCAAAGCACCCC	60.05	CTTCGTCGATCCACCTCAAT	60.07	TCATCTTTTCAAAGCACCCCTAAATATGTATCATACTTTATTCTTCTAATATGGTTGCAATATCCAATATAATATTTGTATTATAGGGATTGGATGTATTTGAAGTGTCGAGAAATGGGGTTGGTTAATTGACTTTAAAAGAATAATAATAATAAATGGCACTAAATTTAAGAAAAAAGTATGACAATTAAAAAAATAAAAAAAACAGTAATAATAATAATAATAATAATAAAAAGATTGAGGTGGATCGACGAAG
CmoSSR00024	p2	(TC)13	Cmo_Chr01	138925..139956	GCTCAGCTTTGGACAGAGAAA	59.75	AGAAGAAGGGGAGCACATGA	59.8	GCTCAGCTTTGGACAGAGAAATTAGGAATAAGAAAACTTGAAACCAATCAAATTGTAAATTCATGCAATTCTGATCATAAAAAATAAAAAGGAGTTTTGATCTTCTCTCCTTTCTATGGCTCTGAAAAAGTTATATTCTTTCAACACAAAACACTTTTCTGTTCTCTGCTTCCTTATTTTTCACTTTGTCCTCCATGTATAGCCATTCATTTCTCTCTCTCTCTCTCTCTCTCTCTCTAAAACTCATGTGCTCCCCTTCTTCT
CmoSSR00025	p5	(TATTT)4	Cmo_Chr01	149684..150709	GGGCGTGGTAGACAGGTAAA	59.99	TTTTGAGGCATCAAGAACCA	59.25	GGGCGTGGTAGACAGGTAAAATATTATTATTATTTTTAGGCTTATACCACACAAGAAACCGTTTTTTAGATGATATGATCTCATTATCTATTTTATTTTATTTTATTTGAAGAGTAGTTAAACACATTCGTTTTTGTACCACATGAACCACTTCTCTTCGAACTATTCAATATAATGGGTATCATGGATGTTAAATTTTCTTGAACTCTATTTATAGGTTATTGCTGTTTCCAAGTCTTCAGACTTAGTCTTGATGGTTCTTGATGCCTCAAAA
CmoSSR00026	p6	(TCCAAA)4	Cmo_Chr01	155842..156871	TTATGGAAGGATGAGTGGGC	59.89	AGAAATTTGGTGGGCTCAAG	59.17	TTATGGAAGGATGAGTGGGCACACGTGTTGATGAGCCACACGTGTGCTGATTAAATGGGCCCAGCCCATCACGCGCGATGATGTAAAGTCACTAATGGGCTGCCCCTCCAAATCCAAATCCAAATCCAAATCTACCACGCTTGCATTGTGGGCCCAAATCCCAACTTGAGCCCACCAAATTTCT
CmoSSR00027	p7	(TAATAAT)4	Cmo_Chr01	157858..158891	CAAAAGGAGAAGCAAGGACAA	59.48	TTGAGTTTTGGCGAGGCTAT	59.85	CAAAAGGAGAAGCAAGGACAATTATATGCTGCAATTTAAAAATTTAAAAATATATATGAAGAACTAATAATTTGAAATAATTTTTAATCATATAAATGAGAGTAAAATTATAAAGTTTACTGAAATTTTAGGGGGACAAAGAATTGTGTCATTATTTAAAGAAGTAATGAAAGTAATAATTAATAATTAATAATTAATAATTAATGATTAATGAACATGTGTGGAGCATATTATGGGGAAGATAGCCTCGCCAAAACTCAA
CmoSSR00028	p5	(AAGAA)7	Cmo_Chr01	164992..166032	CCGAGGACATCGATTTTTGT	59.93	ATCTTGGGATTGCCAAAACA	60.31	CCGAGGACATCGATTTTTGTACACATATCATATCAAGCCATTGTCAAACTGATGATGATGGAAATACTTTGCACGATGTAATCCCTAGACTCTCTAGCAAAAAGAAAAAGCAAAAAAAGCGCAGATTCAAAATATATGAGGTATATAGGGACTCGGATGTGTAGGGTTATGCTTTTTCGTGCAAAGCATGAAGATGATCGTAAGAAAAGAAAAGAAAAGAAAAGAAAAGAAAAGAAAGAAAAAAAAAAAGACAATGTGTTTTGGCAATCCCAAGAT
CmoSSR00029	p4	(ATAA)5	Cmo_Chr01	170430..171455	GGCAGACGGTTGCATAAAAT	59.97	CACTTATCTTGGTTGTTCTGCTG	58.96	GGCAGACGGTTGCATAAAATTTAAAAAACATGACAGCAGTACTCTTCAGTGGACAAAACAACAAATTCTGAGAAGAGTAGAACAAATCTAGAATATTACTATTATGTCCATAAATAAATAAATAAATAATGCATACAGCAGAACAACCAAGATAAGTG
CmoSSR00030	p4	(TAAA)6	Cmo_Chr01	186282..187311	CTTCCGTGGGATGATAATGG	60.15	GCTTCTGGCAGATTGGTAGC	59.98	CTTCCGTGGGATGATAATGGCCACTATAAGGCCATATAGCCTGAAACAAAAAAAACAAAAAAAAATCAAATTTCCAAAACCCATTAATTAAAAATTATGCATTTAAATAAATAAATAAATAAATAAATTACCCTGAGAATGCCACTGTCAGCTACCAATCTGCCAGAAGC
CmoSSR00031	p2	(AT)10	Cmo_Chr01	222770..223795	TATTCTGCCGTTGTGTGGTC	59.57	CTTGCACAACTTGGTCGAGA	60.02	TATTCTGCCGTTGTGTGGTCAAGCGGCGAGCTGCTCCCTAATTAAAATATATATATATATATATATTACTCCAAACAAAAAAACAAACCAACTGCACAGAGATGCTTCCTTCTCAAGAATATAAATTGTTAAGACGATATGTTATGAAGTACTCGACAAATAACTCTACTTATAAAGAATCCAAATGTGACGAAGCATCAAGTTTTATTGAAGCTCCTTACAGCAGCAGAGGCATCTCGACCAAGTTGTGCAAG
CmoSSR00032	p6	(ATGTAT)4	Cmo_Chr01	234226..235255	TGTGACCGTCTGGAACAGAA	60.29	AATCCTATTCCCCCAAGCAC	60.15	TGTGACCGTCTGGAACAGAACCAAGAGCAAATGTGATCCTCTTATCAACTTGGGTGCAAAGTAAGTCCTTGATGTTCTGAGATGTATATGTATATGTATATGTATATCTATATACATATTATTTGCTGCATTTTGAGGATTTGATTTCCAATATACATCTGTGATGTGGTAAGGTTTTCCTGGAGCATAAGGCAGTGGTAAGACTTTTGTGTAGTGCTTGGGGGAATAGGATT
CmoSSR00033	p3	(ATT)7	Cmo_Chr01	235476..236502	CGTACGGTTTTGCCATCTTT	60	CGAGATTGCGAGCACATAAA	59.98	CGTACGGTTTTGCCATCTTTTTCCCATTCCAATATTAGAGAAATCCGTTGGCGAGAAATTGGCCACTTGAAGATTCTGATCAAATTAATTCCATTGAATAAAAATGCAATTTTTTTTTGTAATACAGTGGGTGTTTTTACCCTCCTGGTCCTCTAAGAAACTCCTTTCTTCTCCTTTTATTTTCATTATTATTATTATTATTATTTCCAATCAATCATTTTTATTGACGTAATTTATGTGCTCGCAATCTCG
CmoSSR00034	p3	(TCC)9	Cmo_Chr01	249954..250986	GATTTTCTCCGGCCTTGAAT	60.4	TGTGATGTGCGAGGAAAAAG	59.84	GATTTTCTCCGGCCTTGAATTTGAAAATGTAACCATCTTCTTCTTCATTATCATCTTCTCCTTCATCCTCTACTTCTTCCTCGTCTTCTTCCTCTTCCTCCTCCTCCTCCTCCTCCTCCTCCTCTCTATCCTCTACTTCTGTTTCAACAACTCTTTTTCCTCGCACATCACA
CmoSSR00035	p6	(CAATAA)4	Cmo_Chr01	256488..257517	TGGATCAATCATGCCACAGT	59.93	TGAGCAACTAGAAGAAAAGCCTG	60.19	TGGATCAATCATGCCACAGTAATTCGAGAAAAAAGCTGGGAAAAAGGATCTACTCATTCCCCATCATGGATCTAAACAGAGAACAATTGCAATAACAATAACAATAACAATAATAATAAAATTAACATTTTCTCTCTCTAAAAAATTAAAAAATTAAAAAATTAAGAAATTAAAAAATTAAAAAATTAAAAAAATTTGAAAAATAATTTTCTCTCTCTAACTCTAAGGTATATACAAAATGATACTCTCTTTTTACCAAGACAGGCTTTTCTTCTAGTTGCTCA
CmoSSR00036	c	(TAAAAAAT)3taag(AAATTAAA)3	Cmo_Chr01	256537..257594	TGGATCAATCATGCCACAGT	59.93	TGAGCAACTAGAAGAAAAGCCTG	60.19	TGGATCAATCATGCCACAGTAATTCGAGAAAAAAGCTGGGAAAAAGGATCTACTCATTCCCCATCATGGATCTAAACAGAGAACAATTGCAATAACAATAACAATAACAATAATAATAAAATTAACATTTTCTCTCTCTAAAAAATTAAAAAATTAAAAAATTAAGAAATTAAAAAATTAAAAAATTAAAAAAATTTGAAAAATAATTTTCTCTCTCTAACTCTAAGGTATATACAAAATGATACTCTCTTTTTACCAAGACAGGCTTTTCTTCTAGTTGCTCA
CmoSSR00037	p2	(TA)9	Cmo_Chr01	259728..260751	AAGGGAAAGGACCACCACTT	59.83	ACCAAAAGGATGGGTTTTCA	59.26	AAGGGAAAGGACCACCACTTCTTGAATTAGGAATTTTTGGATCATAATATTCTCTCTATGTGTTTATATATATATATATATAGATAGATAGATTTCAATGTATAATACTTTAGTTGTGAAAACCCATCCTTTTGGT
CmoSSR00038	p7	(AAAGGGC)4	Cmo_Chr01	262274..263307	TGAAAAGAATGGGGTGGTTC	59.77	GTTTGAACACAAATGCCCCT	59.84	TGAAAAGAATGGGGTGGTTCGTACCTTTGTATACTCTTTTGTGGTGAGTAGGCATTGGCAAAGGCAAAGGGAAAGGGCAAAGGGCAAAGGGCAAAGGGCAAAGGCATAGCCAGTGCCCATAAATAAAGGGGCATTTGTGTTCAAAC
CmoSSR00039	p3	(TAT)7	Cmo_Chr01	280531..281557	AAAGTTGGCCGATTTGACTC	59.17	GGCCTAACATCCTTCATGTCA	59.95	AAAGTTGGCCGATTTGACTCGGAAGTGGAAATGGGGAGCAACCTGGCGGTGTTTTTTTATATTATTATTATTTTTTAAACTTTATATTATTATTATTATTATTATTAAATTAATACAATATATATTTTTTATATTATTAAGAAATATTTCTAATTTTAGGGTGGATAGAAGAATACTAAACAATATTAATAATAGGTTTGAGCTATTACAAATGATTTTAGAGTCAGACATCGAGAGTATCTAGCGAGAACATTGGACTCTAAAGAGAGTGACATGAAGGATGTTAGGCC
CmoSSR00040	p6	(TAATAT)4	Cmo_Chr01	294686..295715	TCAAGAAGGGCAAAGAGGAA	59.93	TGAGGTTGGTGGCTTTTCTT	59.71	TCAAGAAGGGCAAAGAGGAAAGTCTTTAAATTAGGAAGGAGCAAAAAGGAAAATAAAAAGTTTCACCCTCAAGCCCCATTTAGATAGCGTAGATAGGATTTATAATTTAGTATTTGTAGTGGATAGAATATTAAAAAATAATATTAATATTAATATTAATATTAATAATAAAAGAATATTCAAACATTATATATATTGTCTAGAATATACGATCTGTGCCTTTGATTATCCATCAAACAGTGTAAGAAAAGCCACCAACCTCA
CmoSSR00041	p7	(TCATTTT)3	Cmo_Chr01	307911..308937	TGGGTTCTCTTGGTTTGGAC	59.94	CCCTTTCCACCTCTTGAACA	60.08	TGGGTTCTCTTGGTTTGGACTGAAGAATTCCACATATTGAGTTTTGACTCTCTTCTTAACCTCTTGTATAACTTTCCTAATGATGAAAGATAGCCGGAAGGACAAAAGGCAAAAACTGTGCATTTTATCATTTTTCATTTTTCATTTTCAATCAATTTTATGTTTTGTTCTAACAGATATACTCACCAAGAATTAACAGTTAATAATTGGATATGGGTGACAAATCATGATAGGGACGGGCCCTACATGCGCCTGCTTTGATTATGGCAGGAAATCTTTGTTCAAGAGGTGGAAAGGG
CmoSSR00042	p2	(AG)10	Cmo_Chr01	313931..314956	TTCAATCGAGGATGGGATTC	59.83	CCTTTTCGGGTTTGGTCATA	59.79	TTCAATCGAGGATGGGATTCATACTTCTAACTTTGTATTTAGGTCATAGAAAAATCTATACTACAATGACATCGTTTAAGAACGATGTTGGATGAGTCCAACAACATTCAAGTACACACTAAGAGAGAGAGAGAGAGAGAGTAGTACTATGAGAGTACCATAGACTTTCCTTCCCATGAGTGATAATAGCTTGAGTCCAGTGAGTATGACCAAACCCGAAAAGG
CmoSSR00043	p7	(TTAAAAA)3	Cmo_Chr01	316175..317201	GGGTGGTATTATCTCAAACTTTCAA	59.69	TTAACCGGAGCTTGTTGGTC	60.11	GGGTGGTATTATCTCAAACTTTCAATTTTTTCAACATATTCGACATTTTTTAAATTAAATTTAAAAATTAAAAATTAAAAATTACATGTCGAAAAGTAGAGTTTGTTGGTCACCCGTTCCTATTTAAGACATAAATAAACCAATAAAGAAAATCTTAAATAGGACGGATGACCAACAAGCTCCGGTTAA
CmoSSR00044	p5	(TTTTA)4	Cmo_Chr01	316568..317593	GGTCGGTTGGGTATTTGAGA	59.79	TGGAATGTGGAATCTGTTGG	59.34	GGTCGGTTGGGTATTTGAGAAAAGTCTTCCATTCATGGAAAATCTCATCAAGATTTTGGAATAAAAGAATTAAGCCTTTTTTTATTTTATTTTATTTTATTGTCTCTCCCTAAAATTCCTTGAAATTATTATTCTAAAATATCAAATAATAATAAATATATATTTGGGTTATTTTTTTAATGAACAATTATGGCAGTAAGTTGGAGAGTGTAGAACAAACAAGCTTAGAGAGAGAAACCAACAGATTCCACATTCCA
CmoSSR00045	c*	(TTATTTA)3(TTA)7*	Cmo_Chr01	326501..327545	AGGGCAGGTTTGTGCTAAAG	59.38	TCACGTGACCATGTGAACCT	60	AGGGCAGGTTTGTGCTAAAGTCATAATATATGTATGGATCTGACATATTCTCATCAAATCAATGTTTCCTGTTTGTCAATTGTTACAATTATACATGCACCTTAAGATCTAATTCTGCTTCCCTGTTTGAAGTTTTTTTATTTATTATTTATTATTTATTATTATTATTATTATTATTTTGAGGGCTTTGGCTATTTAAGATTGTTGTACCTGAACTGAAATTTTACACCAGGTCATTGATGTTGGGGGTAAAGAGTTTAGGTTCACATGGTCACGTGA
CmoSSR00046	p2	(AT)9	Cmo_Chr01	365971..366994	TGGATGCTAACTTCCACACG	59.72	GGTTACAAGTGGGATTTGTGG	59.2	TGGATGCTAACTTCCACACGTCCCACTCTTATTCAATTTAAGAAATATATATATATATATATTGAGTAAAATAAATAATTAGATAATTATTAAAATCCACAAATCCCACTTGTAACC
CmoSSR00047	p6	(TAATAT)4	Cmo_Chr01	385973..387002	CATGATGTATCCATTGTTTTGC	57.9	CACACACACACTACAAACATTTCTT	58.22	CATGATGTATCCATTGTTTTGCATTTATGCATCAATAATATTAATATTAATATTAATATTGGTTAGCCATCAAATCAAGTGATATTTAAAAAAAAAATGTTGAATAAATTATTTGGATAAACGTATGTTTTAGTATTTACTTATTTTTTAAATATTTAAATGATGGTACTCCATATTTATTAAACATATACTAAGAAATGTTTGTAGTGTGTGTGTG
CmoSSR00048	p2	(TA)11	Cmo_Chr01	400587..401614	ACGTTGGCAACAGGTTTAGC	60.18	TGGGTCGTGAACAGTGTCAT	60	ACGTTGGCAACAGGTTTAGCCTTCCTCGGAAGGAATGATCCTGCCATACACACAATCAAATATTATCTTTAGTTTTATTAAACTCAATAAAAATTAATTTTAAGTTTTTGTTGAATTATAAAATATAAATTTGAATAAGTATATAAATAAGAATGAAAATGATATTATAAGGATATTAAAATTCTATATAAAGAAAAACGGCAATATCTATATATATATATATATATATACACAAGTTGCGTAGTTGAGTCTCCCTCGTTTCCAAAATTTTTAATAGTCATGACACTGTTCACGACCCA
CmoSSR00049	p4	(TTGG)5	Cmo_Chr01	423964..424989	GGACACCCACAAATCTGCTT	59.97	ATGGGCCAATTTAACGTTGT	59.21	GGACACCCACAAATCTGCTTATACTCTTCCCAAGGCTCCCACTTTTAAGAAGGCATCATCATCATCATCCAAAAAGATCTCTGTCTCTTGTCCCGGTTACGAGAGGCAGTGATTTGGTTGGTTGGTTGGTTGGTTGTGATAGCCTTCCATTTCTGTGTGTACATGATGTCTGAGTAGTAGGTTTACAACGTTAAATTGGCCCAT
CmoSSR00050	p7	(GTCGCGG)3	Cmo_Chr01	426254..427280	GGGCCAAAAATCAGCTTACA	60.07	TAGGAGGAGGGAGAAAACCG	60.56	GGGCCAAAAATCAGCTTACACGCGCCTCCACGCGCCAGTCACACGCCGGGGAGCAGCCACTCGCAGATCCCACGCGCGAGTGTCACGCGCCCAGAGATTTCTGCAGTCGCGGGTCGCGGGTCGCGGGTCCGGGTCGCGTAGCCAGAGACGCGTGTTGCAGGAGAGCTGGAGCCGCGTTTTCCCAGGCGGCGCTCGACGCGTGTCCGGGGGCGATTGGCGCACGCGGCCCTCTAGCTGGTTGCCACGTGGTACGCCGGCGGTTTTCTCCCTCCTCCTA
CmoSSR00051	p4	(AACA)5	Cmo_Chr01	429455..430480	TTCAAAGGTGAATATAAGTGGTGAG	58.69	CAGAGTGGCGTTGAATGAGA	59.98	TTCAAAGGTGAATATAAGTGGTGAGTAGTAAAAGTAAGGCTAAATTTAGATGAACAAACAAACAAACAAACATGATTTTTGTCATTTATGTAAAAGAAACAAAACAAAAGTAAGAAATTGATCGAGAAATTATGAATTTACAGGAACACTCTGATTCAATCTTTCAAACCTGTCTCAACAAAAATCAGAACTCATCAAACCCTTCATCTCCTTCAATCCGATGACAGTATTTCTGCATTCTCACGCCGCTGGTGCTGTTCCTGCCTCCCATAATCTCATTCAACGCCACTCTG
CmoSSR00052	p6	(AAAAGA)4	Cmo_Chr01	439797..440826	CCATTCCCAACTGTCGTCTT	59.97	AATGATGGGGTTTAGGGAGG	60.01	CCATTCCCAACTGTCGTCTTCCTTTCGCCAGCTCTTCTCCCTGCCCCCACTGGCATGGCACCCCATTTACATACTCTGTACAAAAGAAAAAGAAAAAGAAAAAGAAACCCTCTTCTTTCTTGCCTTTCACAACTACTCTGTTTCTGCCTTTTTTTTCACTTCTTTCCTCTGTTCTTCCTCCCTAAACCCCATCATT
CmoSSR00053	p2	(CT)14	Cmo_Chr01	454333..455366	GAAAGGTCTCCTCCGGTTTC	60.05	GCATTCTCTTCCCAGCTACG	59.98	GAAAGGTCTCCTCCGGTTTCTCCTGCGAAATCTGTTGTCCCTCTCTCTCTCTCTCTCTCTCTCTCTCTACTGGTTTTTGTTGAAAGCCGTAGCTGGGAAGAGAATGC
CmoSSR00054	p6	(TAATTA)4	Cmo_Chr01	458014..459043	CTCCAACCTCCACCACTTTT	59.04	ATTATGGTGTGGTGGCCATT	59.94	CTCCAACCTCCACCACTTTTATTATCATTAAAGAAATTAAAAGTGAAAGCTAATTAGTGTTGTTGTCACCTAATTATAATTATAATTATAATTATTATTATTATTAGTAGTTTGTATATTGTATTATAATCTAAACATAGTTCAAATAATCTAAGCATAAGATCGTAATTATTATGAAAACACATGATTATTATCATTTAATACATAAAAATGAAAATGGTGTGGAATTATTAGAAAAAGCTGTGTGGTTTGCAATGGCCACCACACCATAAT
CmoSSR00055	p3	(CTT)8	Cmo_Chr01	461040..462069	GTCTTCATCTGGGGCTTTCA	60.2	TCTCTTCCGTACGCCTCTGT	60.01	GTCTTCATCTGGGGCTTTCATTAGGAATTAATGTCAAATTATAGAAGGTTTGGTTGGTTAGAAGTCGCTTTGTTAGGAGCCTACCAATTTTTATTTTTATATATAATATAATGTTCTATACAATACTACTCTCACATGTCACTTTGCTCTTCTTCTTCTCCTTCTTCTTCTTCTTCTTCTTCTTTCTCTCGGCATCAATGGCGGAGCCAAACAATTCGAATTTAGAATCTGAGAGTACAGAGATCAAAAGGGGAAATCGAAAGCACCAAATTTACAGAGGCGTACGGAAGAGA
CmoSSR00056	p4	(TAAT)5	Cmo_Chr01	462418..463443	GGATAAGGCATTGTCGAGGA	60.04	AGATATGCACATGCAACCCC	60.75	GGATAAGGCATTGTCGAGGATTGGGTGGACAAGAGTAACATTCCTCAACGTGAGCGTACCTCCATTTCTTTTTTTTATAATTAATTAATTAATTAATTGATTAATTGATTATCATCCCTCACATGTGTCATGTGATATGGCCTAAGCAATATCATTTATTTTTAAATAAATAAATATGTATTAAAATGGATTTCTTTTGTTTGCATTTATTTGGTTTTTAAATTGGGGTTGCATGTGCATATCT
CmoSSR00057	p2	(TA)9	Cmo_Chr01	473414..474437	TGAATTCCTTGCTTTGCCTT	59.82	TGAGCAACTGAACAACAGGG	59.87	TGAATTCCTTGCTTTGCCTTCTTCTAGATTTTTCCTTCTGAAATAATAAAAGTCTAATTTTTCCCTCTTTTATTTTCCCTCTCTTTTAGTCCTTCGATGCAAATATATTATATATATATATATATACAAACAAGTGTAAAATTAAATTTTTAATCTCTTAAAGAGCTAAAATTTAGTTTATATGGTTTTAAGTAATGGGTTAAATTACCAATTTAATTCACTCCATTGTCAAGAAAAAAAAAAAAAAAGTAAAATAAAAAGTAAAAAAATTAATTTACCCCTGTTGTTCAGTTGCTCA
CmoSSR00058	p5	(AAAAG)4	Cmo_Chr01	479272..480297	GCGGGAAAACAAATCAGAAC	59.55	TGTTCACTTGCATAGCGAGTTT	59.95	GCGGGAAAACAAATCAGAACATAAAAATAACTGCTAATTAAAAGAAGAAAACAGAAAAAAATTGAAATGATAATTATTTAACTAATATTAAGAAAGAAAACAAAGAAGACAATCGAATGGGAAAGAAAATAATAATCAAGATTCAAATATAGAGAAAAAAAAAAAGCAAAATAGAACGGAAAGAAAAATAATAATCGAAACTCAAAAGAAAAGAAAAGAAAAGAAAGTCGAACAAACAAAGAACAAAATGAAAACGGAAGTAGTAAGAAAAAAATATTAAACTCGCTATGCAAGTGAACA
CmoSSR00059	p5	(CTTTT)7	Cmo_Chr01	484845..485885	GAGGCAGTTCTTGTTTGGGA	60.23	GGAGGAGGAGGAGGAAGAGA	59.88	GAGGCAGTTCTTGTTTGGGAGTATCTACAAGGAAATAAATACATCACAAAGTGTTTGATATAATAAAGCAACTCACAAAGTAAAGTTGTTCCCTTTTCTTTTCTTTTCTTTTCTTTTCTTTTCTTTTCTTTCCAAGTATTGTTTTTGTTTCAGGTGGGTTTGATTCTCTTTCAAAGCATAAACTCAAGAAAAAGCTGATATTGTGAAGAGGGAATTTTTGTTTGAAAGCAAATGATGGGTGGAAACCCTAGTAATTGGTGGAACATGTTTCCACCTAATTCTCTTCCTCCTCCTCCTCC
CmoSSR00060	p3	(TCC)9	Cmo_Chr01	485037..486069	AGCAAATGATGGGTGGAAAC	59.8	ATTGGGATGCTCTTGATTGG	59.89	AGCAAATGATGGGTGGAAACCCTAGTAATTGGTGGAACATGTTTCCACCTAATTCTCTTCCTCCTCCTCCTCCTCCTCCTCCTCCTCAGTTTGTTGTTGGATCTTCTTCGCTTCCTTTCACTTCCATGGCTGATCATCCCAATCAAGAGCATCCCAAT
CmoSSR00061	p3	(TTA)7	Cmo_Chr01	487184..488210	AAGAGAGAGGGGCTTCAAATG	59.83	GTGCTGTCGTTGAAGAGCTG	59.78	AAGAGAGAGGGGCTTCAAATGAAAGCATCTAAAAATATTATATATAAAAATAAAAAAATAAAAACTGTATTTTATTCATAAAGGAAAGAAATGAAAGAACAAGGTTCTCAGCTTTTCATACAACTTTAGCATTATTTAAAAGTTACCTAAAAGCATTCTTTGTGAATTCCTAATTGTTTTGGAATCATTAAAGGGTTAGCTCAAAATTGCAACTTTATTATTATTATTATTATTATTTTTTAAATTTTGCTTTCTTGGCCATTGCAGCTCTTCAACGACAGCAC
CmoSSR00062	p2	(GA)9	Cmo_Chr01	505590..506613	AGGACAGAGGTGTTGGTTGG	60	ATCCATCTCTTCTCTCGCCA	59.91	AGGACAGAGGTGTTGGTTGGAAAACCCAAAAAAACAGAATCAAATTTCAACCGAATAGGTTGGTTTGTTATGTTGTTTGAAATGGGGATTGGGTTACATGCAGGGTTTGATAAGATAGATGTGAGAGAGAGAGAGAGAGAAAGGGAGAATTTGGCGAGAGAAGAGATGGAT
CmoSSR00063	p3	(AAT)9	Cmo_Chr01	527298..528330	TTCGGCATGCCTTTATTTTT	59.56	TCAGGCAAGCACATTCTATG	57.44	TTCGGCATGCCTTTATTTTTTTTCAAAAATAAATAAATAATAATAAAAAATCCTTTTTAAGTATCTTATTTTACAAATTGACTTTTTAAAATAAAAAGGGGAATGTTATGATAACCTATCCATATTAGCTAATTGGGAGTGGGCCTCTCACATGCATGGCTGGACAAGGATTTAATTTATCATAAATTTAAAATAATAATAATAATAATAATAATAATTAGCACATAGAATGTGCTTGCCTGA
CmoSSR00064	p2	(CT)9	Cmo_Chr01	542440..543463	TCATTTGGCTCCAAAATGTGT	60.36	CGAAAACCAACCGAGATGTT	59.97	TCATTTGGCTCCAAAATGTGTAATTTTAAGGATTAGCTTTGTGGGTTTTTTTTGTGTTTCTTGATTTATTTCTTGAGATTTGGTTATGTTCAGTAGTTTATTGTCTCAACTCTCTCTCTCTCTCTCTCCCCTTTCATTTTTCTTAACACGTCTTAATAATTGTATAGGTTTTTGGTTTCTTGTTTATCTATATAAATTTTTTTTCTTTATTTATTTAAAAAAAAAAAAAAAAAAAAAAAAGAGAACATAACAGACCATAAGGAAGTTTATAGAACATCTCGGTTGGTTTTCG
CmoSSR00065	p5	(TTTTA)4	Cmo_Chr01	543015..544040	ACTTTGAATCCAGCGACCTG	60.25	GGCCTTTTCAGTTCCCTTTC	60.05	ACTTTGAATCCAGCGACCTGGGTTCGACTCCCGGTAGGACCTTTTTTATTTTGCCAAATTTTGTTTTATTTTATTTTATTTTATTCTCTGATAAACTTAACCAGACATGTGACGTACAAAGCACCAACCTAAGTTCCTTTGATAAGAAATAAATAAGGCCATGTGGAGAGGACCATAAGACACTGTTGATAGTCTTGTTCATGGAGGGATACTGTCTGAAATCACTCACTTCTGTGCAGTTTGTATGGTTGAAAGGGAACTGAAAAGGCC
CmoSSR00066	p2	(TA)10	Cmo_Chr01	545495..546520	TCCAATCGATCGAGTTTTCA	59.2	TGGGAGATTAACACTCCAAAGC	60.48	TCCAATCGATCGAGTTTTCACAATTTCTTTTTTTTTTCATCGATTTGAAATGTATACATACAATTATATATATATATATATATACTCAGGATCATACCCTAACTTGATAATGTTAATGATCTTGTCTAATTTGACAATTCACAAAGGTTAATGACAAAATTTCTGTTTACATCCTTGGATCTTGTTTGACAATTTACTGAGCTTTGGAGTGTTAATCTCCCA
CmoSSR00067	p2	(AT)10	Cmo_Chr01	568497..569522	CATTTGGATCCCCATTTATTG	59	CCATTTTCCACAAACTAAAGAGAAG	59.62	CATTTGGATCCCCATTTATTGAACTAAAAAATAAATTATCTTACCTTAATTACTTAATTATCTCCTTACCCAGTTGATTAATAATATAATTTAAATTATGTCATCCACAAAATATATATATATATATATATCTTAAACACTCTTGTGTTAAAAAAATATATATTTCGTTCACTATTTTCAAATTAATTAAAGCACTAAAGTTATACTTTTTTTTTTCAAAGAATAAATTTATGTATATTTATTTGTTTAAAAACTTCTCTTTAGTTTGTGGAAAATGG
CmoSSR00068	p2	(AT)9	Cmo_Chr01	571485..572508	CTTGGGTAGGTTGTTTCGGA	59.96	TATATTGGGGCACCTTTGGA	60.15	CTTGGGTAGGTTGTTTCGGATTATAATATATATATATATATATGGCAACTCCAAATGCAAAAACAATACAAACAAAGATGTTTTGAGGTATAAATACACCATGTATTTACCTTATAGGTACCCCAATCAAATTTGGCCCAAACAAGTTCAGGTCCAAAGGTGCCCCAATATA
CmoSSR00069	p4	(TTAA)5	Cmo_Chr01	571974..572999	TTAACGGTGGAATTTGGCTC	59.94	TGCTTCCTTGACTTTCTTTCTTC	59.19	TTAACGGTGGAATTTGGCTCTTATAGTTGAAGAGATATAAGATTATTCTGACATTTTTTTTTTACTTTGTGTTATGAATTTTATATTTGACATTTTTTTAAAATTTTAATTAATTAATTAATTAAGCACATAGAAGGCATTCAATTAAAAAAAAAAAAAAAGGAATTATATTATAAAAATAAATAATTAAAAACTAACCCATAAAAAATGAGAGAGAAAGGGGTAAATAGATAAAATAAGGTACATTAGAATTTAAGTTTATTTTTAATAGAATAAGAAGAAAGAAAGTCAAGGAAGCA
CmoSSR00070	p3	(AAT)7	Cmo_Chr01	573570..574596	TTTCAATGAGGTTTGCACAGA	59.31	TGAGGGGTACCTACTCCCCTT	61.08	TTTCAATGAGGTTTGCACAGACTTATTTAATTTTGCAATATTGATAAATTATAATAAATTTGAACTTATGGTTCAAGTTAACCTTCAATTTTCATTTTCGTTTGAGAAGGTTTATGAATTTTTAATTTTGAAAATGCTTATTTTAGTTTTTAAATATATAAATAAAAACTTCTTTTTGAATATTAAATAATAATAATAATAATAATAAAATTTCAATCTAATACCAAAGACCTAATAAGGGGAGTAGGTACCCCTCA
CmoSSR00071	p4	(TTAT)5	Cmo_Chr01	574052..575077	GGGTTGTTTAGCATAAATTGGG	59.62	TCCAAACCCAGTCCACCTAC	59.82	GGGTTGTTTAGCATAAATTGGGTTCAATAGGAAAATTAAGATCTTGCTATTGAGAGTTAAAAACTTATTAGGTAAATAAATATCTAAATTTATGATTTAATTATAATCTTAATTATTAAAAAACGTTGTGTTCTAGAAGTGACGAAAACGGAATAATAGTAATAATAAAAAAGACGAAAATGGAAAAACATACAAATTTATGGAGGAATGAGAGTTGTTATTTATTTATTTATTTATTATTATAATTATTATTTTGTTGGTGAGTTTGGTGAAAGATGTGGTAGGTGGACTGGGTTTGGA
CmoSSR00072	p8	(TCTCTCTT)3	Cmo_Chr01	602000..603029	CAGCTATCAAACCGTACGCA	59.9	ACCAAACGTCTTCGGACATC	59.97	CAGCTATCAAACCGTACGCACGACCGTACTGTATTGCTGCTCCAAAGAGTCTTGCGATCCGGTGCTGAAGGTCCTTCGAAACACCGGCCAGTGAGTCTCGCTTGAAGGTTGAAAGCTCGAAGATCCTTCGGAATCTCTCTCTCTTTCTCTCTTTCTCTCTTTTTCGTTCATTCAATATCGACCCGGAGAATCGAAGTTTCCGAATTCGGACAAAAAGACGGCGATCGAAAGATGTCTCTGACGGCCGTGAAGATGTCCGAAGACGTTTGGT
CmoSSR00073	p2	(TA)9	Cmo_Chr01	614522..615545	ACTTCGTGTACATTTGCCCC	59.86	AACTCCAACCCACCATCATC	59.64	ACTTCGTGTACATTTGCCCCCACCATTGTAGTACTCATCATCACCACTACCAACTTAAGTTATATATATATATATATAAATGAAATTTGATACAATTTGCTAGTAGATGACGATTTTGACCCATACATGAAAATTCATTTTTTTTTTAAATAAATAAACTAATTATGATGAAATTTGATGGTATGATGATGGGGGAGGGGACAACTATATTTATATATAATTGCAAATGGATGATGGTGGGTTGGAGTT
CmoSSR00074	p2	(GA)16	Cmo_Chr01	616476..617513	ATAGAGAAACCTGGCAGGGC	60.6	GCAGATCTCTGCAAACCCTC	59.96	ATAGAGAAACCTGGCAGGGCAAAAAGGGGAAACCAAAAATATAAACGCACACAAAACTTACTCCGTTAGTTTCCGAGAGAGAGAGAGAGAGAGAGAGAGAGAGAGAAGAAGGTTTTGGCTATGGAGGGTTTGCAGAGATCTGC
CmoSSR00075	p7	(AGTTCAT)3	Cmo_Chr01	625127..626153	AATTATCGGCTTCTCGGTCA	59.67	TGAACTCAGGGCTCGTTTCT	59.99	AATTATCGGCTTCTCGGTCATAATAATAGTCACCCAACCAACATAAGGTAAAAACCTGAAGAAAACCGCGCGCGCATTAGCCATATATGTATTTACTATTTATACACTTCAATGGCAGAAAGAAAATGAGAACCAAATGAGACATTAAACATGATAATAAGATAAAATGACAGCCTTAAGTTCATAGTTCATAGTTCTTAAGTTCATAGTTCATAGTTCATAGACATCGAACATTAAACAGGAATGTTAAGAAACGAGCCCTGAGTTCA
CmoSSR00076	p3	(TTC)8	Cmo_Chr01	637934..638963	TCAACAACAACGAGGAGCTG	60.02	TCCATCCCCAGAAACAGAAA	60.43	TCAACAACAACGAGGAGCTGCAAAAATCAAACTCCTGCAAATCAACTTGCTTTGTACAATGGAATTCTTAAACAACGATCGCAGAGGATCCAATGTTCATTTTAATCAAAGCCTTTGCCTTTTCTTCTTCTTCTTCTTCTTCTTCTTTCGTTTTTGTTTTTCATTGTTTTCTGTGTGTTTCTGTTTCTGGGGATGGA
CmoSSR00077	p2	(AT)10	Cmo_Chr01	648041..649066	TGAATGGTAACGGGGAATGT	60.05	CCTCGAGTCATCCACAGAGAG	59.99	TGAATGGTAACGGGGAATGTCCCAAATTACCCATATATATATATATATATATGTATGTTGGCATTGGTGGAAGACAGAGAAAATCAATCAAGTATTCCTTCGTAGTTTTTACAAAGTTCTATTCTCTCAAATAATTCTACAAAATTTATCTATCGTCACTAACATACCTAATATGAGGTCATGGATAGATATTTCTCTTCAAATAATCTCTCTGTGGATGACTCGAGG
CmoSSR00078	p5	(AAAAG)4	Cmo_Chr01	657119..658144	AGCATTCTGGGTGTGGAAAC	59.97	ATGGAATGGCTCATTGGAAA	60.27	AGCATTCTGGGTGTGGAAACCTCTAGCTCTCTAGTAGACACATTTCAAAACAGTAAGGGACGTAAAGGGCTGAAACAATCGATAGGGATAGGGAAAGTTGGTGAGGATATCATTAGTTTGAATGTAACATTACAACCACAACCAGTTTTTGCTTGATAAAAGTGGATTGAAAACCAAGAAAAGAAAAGGAAAAAGAAACAGAAAGGAAGAAAGAATTATAACTCTACAAAAAGAAAAGAAAAGAAAAGATGTTTGAGGTGAAGAAGAGAAAAAGTAGGGTTTTCCAATGAGCCATTCCAT
CmoSSR00079	p3	(CTT)15	Cmo_Chr01	657214..658264	TTCCAATGAGCCATTCCATT	60.27	TTCACGAGCTGTTTCAGGTG	60.02	TTCCAATGAGCCATTCCATTGTTCTTTTTCTGATTAAGATCACTTCTTCTTCTTCTTCTTCTTCTTCTTCTTCTTCTTCTTCTTCTTTTTAGTTTCTGGGTTCAATTCTGTTGCATTGGGTACCTAACTCCTGCGCCCAACACTCTTTGCTGCTCTATCTGCATCACATGCAAATTACAAAAGCTAAATGAAAAAAAGCTGCCTTTTTTGTGTAACAATTTTTATACAACAACTTTCATCTTTCCCTATCTTCAACTCACCTGAAACAGCTCGTGAA
CmoSSR00080	p8	(GCTCAAAT)3	Cmo_Chr01	677012..678041	CTCACCGGAGCTTCATCTTC	59.95	CCACTCACCTACCCCACAAC	60.28	CTCACCGGAGCTTCATCTTCGACCGCCATAGCCTTCTGATCATTGTTTCTATCTTCAAGCTCTTCCATTAGAGGAAAACGGGACGTTAATGGCAGAGAGCAAAGACAAGAGAGAGTATGGGACTTTGGAAGTAGCACTGCCTCAGCTCAAATGCTCAAATGCTCAAATGCTTCGGCCTTTATTTATAGTAAAAAGGGTTCCATTTTATTATTATTATTATTTTAAATTAAATGGTTTGCATGCAATTTGAGAAATTATGTTGTGGGGTAGGTGAGTGG
CmoSSR00081	p5	(TGTAT)4	Cmo_Chr01	696122..697147	TTTTTCTTTCCCCATTTCCC	60.1	GCACACACAGAGAGAACCCA	59.87	TTTTTCTTTCCCCATTTCCCTTTGGAGGCTCTGGCTGTCACTTACAAAAGCATGTCAGAGTGGTAAATTTGGGTACTCATTATGATTCTCAAGCATTGTTTTATGAGTGCAGCTGAGATTTGTATGATTTGTTTTGGCTCTTTTTGTTCTTATTTGTGTATGTGTGTATGTATTGTATTGTATTGTATTGTAAGTGGCATCAAACTGTATCCAACTTTCTGGGTTCTCTCTGTGTGTGC
CmoSSR00082	p3	(TCT)7	Cmo_Chr01	704937..705963	AAATGGGGCCCAAAATAAAT	59.4	ATTTACGCTCGCTTTGGAGA	59.98	AAATGGGGCCCAAAATAAATATATATATATGTCAAGTTGTTAAATTATGACTTAAAATATATAAATCTTTGAAATATATTAAAAAAATGGAAGACAGAAAAAGACCTAAAATTTCATAAAAACAACATGAACACAATTAAAACAGTGGCGTTACGTGTAACAAGAAAAATCACACCACATCTTACGATCCTCTTCTTCTTCTTCTTCTTCTTGTTGTCGCCCACAGTCTCCAAAGCGAGCGTAAAT
CmoSSR00083	p6	(CAACCA)4	Cmo_Chr01	709401..710430	TCATTGAACAACGCTTCTGG	59.84	GGCAACTGTTTTGACCTCGT	60.16	TCATTGAACAACGCTTCTGGGACCGGGAGCCGTTTCAGAACTCGCCCAAAACCTCAACCACAACCACAACCACAACCAACTAGTAAGCTATATTGACAGATCTTTCCTGCAAGTTTTCCTAATCTCCTAATAGAACTACATATAACATTTTCATCCACACTTTTCAATAGTGGAATTCTTAGAAGTGATTGCATTTGCAGGTACAAGTACAGAAGACGAGGTCAAAACAGTTGCC
CmoSSR00084	p5	(AAAAG)4	Cmo_Chr01	710984..712009	CGCTTTTTGGTGATGACGTA	59.73	TTCCGATTTGAGGGTTTCAG	60.04	CGCTTTTTGGTGATGACGTAAGCACATAATTATATAATACTATTTTTAGAACAAATATCTGTACTATTTAGACCCCAAAAAAAGAAAAAGAAAAAGAAAAGAAAAGAAAAGAAAAACAAAACTGAAATTCAAGTAAATAAACCGAGGATCCTCTACGGGCAGGCGCATAATATAATAATAGGCATTTGGTCGACAATCGTACTTTCCATTTTTACCACTCCGAATCGGACTCTGAAAGGCGGAGAAGGACGTCGTAAATTCTCTGAAACCCTCAAATCGGAA
CmoSSR00085	p5	(TAAAA)4	Cmo_Chr01	730405..731430	GGCCGAGTTTTCTAAGGGTC	60.07	GAATCTTACCTCGGCCCAAT	60.29	GGCCGAGTTTTCTAAGGGTCATTTTAAAACAAATGGAAAGCTCGAGTGAAAAGTGATTTTTTTTTTTTTTTTTTTTGTCCTCTTTATATTAGGCGTTTGGGGTTTAATAATAACATTTTATTATATGTAAAATAAAATAAAATAAAAAGATATGGGCCTAAGCAATTATGTGGCCCAATATCAAAATTGGGCCATTGGGCCGAGGTAAGATTC
CmoSSR00086	p2	(CT)15	Cmo_Chr01	730580..731615	ATATCTCTCTCACCGTGGCG	60.24	ACCTGACGGAAACTTTGACG	60.15	ATATCTCTCTCACCGTGGCGGGCACAAGCCAGTAAGCTGCTTCTTCTCCCCGGCCTCTCTCTCTCTCTCTCTCTCTCTCTCTCTCCCCCTCTCCTAGCCGGATTCGAGTTCAACTTCCAGCCCTTAAACTCGTCTCTGATCGAAAATGCTAGGTCGTCTGGCTGCCAATCGTCTAGCTGGAATTCGTCAAAGTTTCCGTCAGGT
CmoSSR00087	p2	(TC)13	Cmo_Chr01	742908..743939	TCTTCTTTTCTCTCTCCCAAGC	59.24	CGCTGATGAACTCGACAAAA	59.99	TCTTCTTTTCTCTCTCCCAAGCTTTATCTCTCTCTCTCTCTCTCTCTCTCTCAAGAAACATACATGAACTTGCAGAAATGGTGATTTTATATAGGGACCAGGAGACAGCTAAAGCAGATGATAAGCACACTTACTTATCTCCGGATAAAATAAGAAAATATTAAAATATATATAATCTATCAAGTTATAACTACAGTCACGATGCGTGATAAGTGCAGATTGGGTGGGCCCCGCTTAGCCGGCTTGATTTTGTCGAGTTCATCAGCG
CmoSSR00088	p4	(TATT)5	Cmo_Chr01	746759..747784	AGATCGAGACAAGTCGAAATCA	58.94	GACCACGTTTCTTTGGCATT	59.98	AGATCGAGACAAGTCGAAATCATATATTAAAATAATAATAATAATAATACTACAACCATAACTTATTAGCTAAAATATTTATTGTGTAAAAAATAAATTCGTAGAAGATTATATATTTGATATTTATTTATTTATTTATTTGAAGCATAATTATAATAATAAAATTTATGAAAAATTGAATTTAAAAAAAGGTTTTTTTTATTATCGATCAACATCAATGGAACATCGACTCCACATGGTGGAATTTTTCAGGAACAAAAAATGCCAAAGAAACGTGGTC
CmoSSR00089	p3	(TAT)7	Cmo_Chr01	746981..748007	AAAATGCCAAAGAAACGTGG	59.97	TGCCCTCACAACTTAGACCA	59.29	AAAATGCCAAAGAAACGTGGTCAAAAGAAGGCCATTGGTTTGCATTAATTAATTAATTAATATTTATATATATTGACCCATATGTATTATTATTATTATTATTATTAAAGATCTTATCAAATTTTTTGGACTTCCATATTGCATTAAATGCTTCAAATTCATCCTATTCATGGTCTAAGTTGTGAGGGCA
CmoSSR00090	p2	(AT)12	Cmo_Chr01	749728..750757	TTCGAAGTCTCTTAAGGGTTGC	59.89	AGTCGCACCTGTTGTGATGA	60.32	TTCGAAGTCTCTTAAGGGTTGCATCTTTTTTATATTGAATAATATATATATATATATATATATATTTTTTTTTTTGACAATTCAAAAGTTGGGTGGGTTTATCATCACAACAGGTGCGACT
CmoSSR00091	p3	(TAA)7	Cmo_Chr01	750764..751790	CAAGACAGCATCTGGTTGGA	59.83	TGGTGGGTAACACATCATGG	60.09	CAAGACAGCATCTGGTTGGATCGATAATTTCTCCACTGAGAAAATAATATAAATTAATTATTAAAATAATTTAAATTGAATTATTCTTGACTTTATGTTTCCATTCATTTCAGTCCCAATAATTAAGAATTAAAATACCTTTATTCTTTTGTTTGTCTTTTCCTTATCCAACCATTTTTTTAAATTATAAATTAATAATAATAATAATAATAAAGGCAAGGTGGGCCATGATGTGTTACCCACCA
CmoSSR00092	p5	(AAATT)5	Cmo_Chr01	755795..756825	TGAGAGTAGGCGACCTTAAACG	60.78	CACCCCAACCTAGAGAGAGAGA	59.87	TGAGAGTAGGCGACCTTAAACGTTGAATCAAAATACATTATCCTTGTGATTAAATTAACACAAATTAAATTAAATTAAATTAAATTAAACCGACTTTTTTTTTTTTTTTTGTATAATAAGAATATAAATATATTGAATTTTTAAAATTAAAAAGAGAAAAAGTCAGTCAAAACACAAAGTAGTCAAAAGACATAAAAAAAAAAGAAAAAAGAAAAGAAAATAATTCTCTCTCTCTCCTCTCTCTCTCTCTAGGTTGGGGTG
CmoSSR00093	p7	(TTGGGAA)4	Cmo_Chr01	756897..757930	TTCTGTTTTGGATTTCCCCA	60.28	GCTTGCATTCTGCTAGACCC	59.98	TTCTGTTTTGGATTTCCCCAATTCTATTGTTTGGGTTAATTTGATGGTGAGAGATAGGTTTTTGTGTTCTACCACCAACACTAGGATTAGAATTTAGTATATTACTAAGGCTTGGGAATTGGGAATTGGGAATTGGGAATGCTTCATTTTGTTTGTTTCTTTTTTAGTGGTGGGTCTAGCAGAATGCAAGC
CmoSSR00094	p5	(TTTGT)4	Cmo_Chr01	775132..776157	TTCTGCTTCTGGGTTTGCTT	59.99	AATTGCGAACTTCAAGGCAT	59.71	TTCTGCTTCTGGGTTTGCTTCTCTTTTCTTCATCTTTCCACCCTTTTCTTTCATGTTGATTCTGCTTTTGTTCAGTATCTGCTTCTACAGGTACTTGTTGAGAGATCAGCAGCAGAGCTAAAAGTGCTGCTATCACTACAGTAAGCTTCATTTATGTTTCTTCGGTCATAATCTTGTATGCATTTTGGTGATGTTATATGTTCCATGTAGAAAAAGGGGCTTATATAGAACAATAGAATAGACTGGTTTGTTTTGTTTTGTTTTGTTTCGACCATAGCATGCCTTGAAGTTCGCAATT
CmoSSR00095	c*	(TCTTTT)4(TA)9*	Cmo_Chr01	782802..783848	AGGGTGGGAAGAATGTGAAT	58.3	TTCATGTACCTCTCTTTGCATCA	59.76	AGGGTGGGAAGAATGTGAATAGAGAGGATGCAATAAAGGTAAAAGAGAATGAAAATGATGAGCTATCACTCTCTATCTATCTATATGATTCACATCAACAAAATTCCTTAACTCATAATTGAAGCAATACCCAATATATTATCAATAAGTGCATTCAAGCATGCATTGTATCTCTTTTTCTTTTTCTTTTTCTTTTATATATATATATATATATGATAATGATGCAAAGAGAGGTACATGAA
CmoSSR00096	p2	(TA)17	Cmo_Chr01	784167..785206	TCACTTTTGACCCACATACTCA	58.13	CTTGGATCATGCGAAGGAAT	60.04	TCACTTTTGACCCACATACTCATTCTATCTATAGATTATTCTCTTTTATATATTAATATTCTTTAAATATTTTTATTAATATTCTTTGAAATATTATTATATATATATATATATATATATATATATATATATTTTTTTTTTTTTATTTAGTTATTAGTTTCACTCTTACTTTAATTAATTTTGTTTTTTTTTCTTCTTTTATCTTTATTTTTTATTCCTCCCTTTCTCTATTATCTTCAACCTCTTTTCATAGTTTTCTTTATTTATTTCATTCCTTCGCATGATCCAAG
CmoSSR00097	p2	(AT)9	Cmo_Chr01	785865..786888	GGGCGTACAACTCGACAACT	60.18	GCTCTGGCGTTCAAGAAAAT	59.46	GGGCGTACAACTCGACAACTCGAACTGACCCAACACAACCCAACTGGTCGGGTTAATTTTTCTAAACCCGAATATATTCAATTCGGGTCTCAAGTTCATTGGACAAAACTTGAAGTTGATGAACAAAATCTTATAAAATATATTAAAATATCTTTTTGGGTTTGCCTCATATATATATATATATATTTTTTATATAAAATTGTATCGAATAATTATGAATAATGAATAAATAAAACTTTTTAAAATTTTCTTGAACGCCAGAGC
CmoSSR00098	p2	(AT)10	Cmo_Chr01	793756..794781	GGGTTTACCTTCAGAGTTTTGTG	59.1	CCATGTCATAAGCGTTTTGC	59.19	GGGTTTACCTTCAGAGTTTTGTGAAGTGATTTTATTTGATTATTGTCGTTATTTTTTCAGGTTGATTTGTTATATTTTCAATTAATTTTCTAATATTAAAGGTGTCCACTCGATACTTAGTATAAAAAGATATATATATATATATATATCATAATTGGCCTAGCTATTGTTATTAATTACTAAGAAGTGTGCATGTATGTGTGTATATATTCAAATACCAAATTAAAAGACAAAAATATTTAAAGCAAAACGCTTATGACATGG
CmoSSR00099	p3	(GAA)7	Cmo_Chr01	794729..795755	TGGTGAACTTAGGGGACGAG	60.1	TCATTTTGTGTTTGCGAGGA	60.23	TGGTGAACTTAGGGGACGAGGGCGTCTGGTTCTGCTTCTACCTCTGCGGAGAATGGTTGGAGAAGATGAAGAAGAAGAAGAAGAAGAAGACTTAGAAGCTGCAATTTCGGCTGTTAATGGCGATTCCTTCTTCTTCTTCTCTTCTTCTCCTTCTTGTTTTTCTTCACTTCTCTTGTTCTGCACTCTGTTCTGTCCAACTTTCGTGGAGTTTAAGGTTGCTGGCAAAACACAGCTGCAAATCCACCCTGCATTCAAACCCCATTTCAGAAAAATCCTCGCAAACACAAAATGA
CmoSSR00100	p3	(AGA)8	Cmo_Chr01	802139..803168	ATTCAGAAGGGGATGGCTCT	60.04	CGCCAAAACACATGAAAAGA	59.71	ATTCAGAAGGGGATGGCTCTGATATGGGAAGATACATCGAAGGAGGAAGAAGAACAAGAAAAAGAAAAAACACAGTAGAGAGAGAAAGAGAGAGAGAGAGAGAAACAAGAAGGAGAAGAAGAAGAAGAAGAAGAAGAAGGTTATGGATATGGTAATAAATGTAGTGGTTGTCGTTGTATGTATAGCAAAGAAATGGCACTGTTTTACAGTTAGAAGTTCTTTATATAGCAAGTGAAGCTAATGAGAAGAACAGCCTTTCTTTTCATGTGTTTTGGCG
CmoSSR00101	p2	(AT)11	Cmo_Chr01	802995..804022	AACGACAAAGAAGATAATCGCC	59.64	TGCTTTTCAAACGATGGATG	59.66	AACGACAAAGAAGATAATCGCCTTTTAAAAAGTGAATTTAAACAAAATTGAAGGGCTAATATATATATATATATATATATTTTGAAGAAATTTAATGTCACATCCATCGTTTGAAAAGCA
CmoSSR00102	p3	(AAT)8	Cmo_Chr01	830237..831266	ATTCAATGCAAAAGCGGTTC	60.08	CCTTGGTCATAGGATGCGTA	58.6	ATTCAATGCAAAAGCGGTTCCTATAACTGGAAACAGAAAGGATGAGGTTTGAGAATAACTTCGACAACAAACGAGGATTCATTTGTCATGAACCAGATACAGAAGATAGCACCCGTAATAGCAACTCTAAATGCTAATCTTCCACAGAGAAAAATAATAATAATAATAATAATAATAAACCATCCAGCATGAGTACACAAAATTCAAAAGATAAAATACGCATCCTATGACCAAGG
CmoSSR00103	p2	(AT)10	Cmo_Chr01	836933..837958	GCGTCGGTCGTTACTTGTTT	60.18	ACACGTTTTTCCGCTGATTG	61.06	GCGTCGGTCGTTACTTGTTTGACCATCATTTCTCGCACGTGCCATCAACTACCTTTCATTAATATAATATATATATATATATATATAATATATATTTTTTTTCTTCTTTTCACTTTCAATTCAATTTCAAATCCTAAACCCAATTAATTCAAATTATTTTTAATTATTTGTATTATGATTGAGTATATAACCAATCAGCGGAAAAACGTGT
CmoSSR00104	p2	(AG)11	Cmo_Chr01	851055..852082	TTTCCGAGCCAACTTTATGG	60.07	GGTTGCCTTGTGACCTTCAT	59.97	TTTCCGAGCCAACTTTATGGATATTGCTGAATTCTCGTTATCTGCAAATGACATGAGAACTTGTCATCTAGAGAAGATAAATTTTCCTAAAAAAAGTTAAGAGAAAGAGAGAGAGAGAGAGAGAGAGGGTTATGCCAAAACGATGATGAAGGTCACAAGGCAACC
CmoSSR00105	p2	(CT)10	Cmo_Chr01	853878..854903	AATCCTGACAGCTTTGGTCC	59.14	AAGTTGATGCAAGGCTGGTT	59.74	AATCCTGACAGCTTTGGTCCACAAGAATCTACCTTCTTTTCCCCTCTCTCTCTCTCTCTCTCTAGATATTTCTCATATCATTCTACCTGTTCTAGTCAAAGAAGAAAAGTTACAGCAAGACCCAGAAATTCTAAGCATTTATTAAACGCTCATGCTATGCAGGAGGCTCGGAGTTGGCATGAAACTAGTTAAGCATCTAGAGGAGTGGTGCAAACAAAAGGGTGCAGACTATGCATATATAGCAACAGACTGCGCCAACCAGCCTTGCATCAACTT
CmoSSR00106	c	(TTC)7(TTTAT)4	Cmo_Chr01	864941..865987	CACCCACTAAGAAAATTCAGGC	60	GAGGTCCCACGTTCAATCAT	59.79	CACCCACTAAGAAAATTCAGGCTATAGCTTCCATTGTTTCTGTTATAATTGAAGCTTTTCTTCTTCTTCTTCTTCTTCTTTATTTTATTTTATTTTATTTTTATTTTATTTTATTTTTTGTATTCACTGGTGGCCTTATAAGTAATAACAGGAAATAACTATGATTGAACGTGGGACCTC
CmoSSR00107	p2	(TA)17	Cmo_Chr01	871469..872508	CCACCCATGTGTCTTCAAAGT	59.88	CCTTTGATATCCTTTTGCCTTG	59.96	CCACCCATGTGTCTTCAAAGTATGAATGTGAGTCAATATTTCTCCGGTTCTCCTTATTCTATTAAAGAGTAACATAAATCATCTGAAGAGAGCTCTATTGAACTATTAACTTTAAGCTCTCTCACAGTTATTCACTTAGATGACTTTTCATTATTTAGTCTAATTATTATCCCAAAACGTGTTGGTATAAAACTATATATATATATATATATATATATATATATATATGTATGTATGTATATAGCCAATTGAGATCATCTTTGATTTTTTTCAAGGCAAAAGGATATCAAAGG
CmoSSR00108	p2	(TA)16	Cmo_Chr01	871941..872978	CCTTGCTAGGCAGGTGATTT	59.34	GTGAGCACACCAAAAAGCTG	59.49	CCTTGCTAGGCAGGTGATTTTTTTTTTTTTTTTTTTTTTTTANNNNNNNNNNNNNNNNNNNNNNNNNNNNNNNNNNNNNNNNNNNNNNNNNNNNNNNNNTATATATATATATATATATATATATATATATATGTATGTATGTATATAGCCAATTGAGATCATCTTTGATTTTTTTCAAGGCAAAAGGATATCAAAGGAGGAAAGACTTGATTATTTCAATTTTTTTAACAATGAAACTTTTCAGTGATGGAATGAAACGAGACTACTTCTCTACAGCTTTTTGGTGTGCTCAC
CmoSSR00109	p2	(AG)10	Cmo_Chr01	873069..874094	CGAGAGTCGGGATGTCAAAT	60.07	ATATTTGGGTGCTTTTTGCG	59.96	CGAGAGTCGGGATGTCAAATACAGACATGTTACAGAAACTAAATTATTTGTGCCTTGTTTTGAAACAAAAGCACAAGTTTTGGGGGAACAGAGAGAGAGAGAGAGAGAGACAAACATTTAACCAAACGCAAAAAGCACCCAAATAT
CmoSSR00110	p3	(TAA)7	Cmo_Chr01	895522..896548	ATCCCCAACAAGAACAGTGC	59.97	CTGGCAACCTTCAGCTTTGT	60.43	ATCCCCAACAAGAACAGTGCACTGCATGATATCTTAGACTTCTCCAACTCGTGTTCAAACAATGCAAATCCAGCAGATCACGCAGAATTAATAATAATAATAATAATAATTGTGATCGTCGTTCAGAAAGAAAAGCAGCTTACGGATTAAGTAACACACGAAGCCCTAATTTTAGGATCTTTCCAATTCCAAACAATTCCTCCAGTAGTTTCACACTGTTCCAATTCTATAATCACAATTTCTTAAGAAGAAAAAAAAACAATTAAACAAAGCTGAAGGTTGCCAG
CmoSSR00111	p3	(TAT)9	Cmo_Chr01	942734..943766	TGAGTCACAAAAATGAATGTGC	58.68	AAAGAGAGGACAAAGCCACG	59.47	TGAGTCACAAAAATGAATGTGCACCTCATAATCAGATTTTATAGTCATACGTGGTTTTGGTTTATTTATGTACTGTTTTAATAAATTAGCATAATAATATTATTATTATTATTATTATTATTATTTTTGATCCATTGGGTTTGTAATTAAAATAATGTAGGAAGAATATGGTAAGATGTGAATGTCTTATTATTGTGTCACTATGTGACATTCATAAGTTAATGAATAAAATTTGAATGTTGGGTCTTCTTAAACTACACGTGGCTTTGTCCTCTCTTT
CmoSSR00112	p6	(CTTTTT)4	Cmo_Chr01	950795..951824	CCCACTTACACTTCCAAACCC	60.63	TGGGAAAAGAACAAATTGGG	59.77	CCCACTTACACTTCCAAACCCTAATTTCATTTCCTCTTGCACTTTACCTTTTTCTTTTTCTTTTTCTTTTTCATTATTTTCAACCATTTTTAGACCTAAAAAGAAAAGTTAAAGGAGCTCAAAGAATAAAGAACAAAGGGTAAAGAGAAAAGGAATGCAACGTTGGTATCGACCCAATTTGTTCTTTTCCCA
CmoSSR00113	p4	(AAAT)5	Cmo_Chr01	954548..955573	GCATTTACATGAATAACTTGCCC	59.77	AAACGAAAATTCCGCTTCAA	59.7	GCATTTACATGAATAACTTGCCCTTTAATTACAAAATAAATAAATAAATAAATAAAATCATGTTCTTTTATAATTATTTTATATAAATACACAAAAAATTGGTACAATTAGACTGATTCTAACCTTTAAAATTAAATTCTAAGTTTTAAAAGAAAAAAAAATTGAAGCGGAATTTTCGTTT
CmoSSR00114	p2	(TA)9	Cmo_Chr01	959792..960815	TGGTGAAATGGGACAAAGAAG	59.96	TTGAAGCTATCCATCACCCC	59.89	TGGTGAAATGGGACAAAGAAGAGAAGCATAATGATGGCAAGAATGTAATTATGTAAACTTCAACTCGGACAACATAATGCATAGGAGAGCCATAATCATCACATTTTATGAAATTTTTTCATATTCTTACAAATTTTACTCTCCAAATAATTCATTTCAATTATGAAGCTTCCTTTATATATATATATATATATTTATTCCACTTGGTTTATGGGCACGGGGTGATGGATAGCTTCAA
CmoSSR00115	p4	(TTAT)8	Cmo_Chr01	962252..963289	GGTGACCATCGCCATTATCT	59.78	TGTTGGGTTAGTGTTTGGCA	60	GGTGACCATCGCCATTATCTCTCTCTTTCTCATTATTTATTTATTTATTTATTTATTTATTTATTTACAGTGTTAACATTACAGAACCAAGCTGAAGCAAACCGAAGTTGACTGTGAGTACTTGAAAAACTGTTGCCAAACACTAACCCAACA
CmoSSR00116	p3	(AAT)8	Cmo_Chr01	974427..975456	TCCCTTCTCTTTAATCATTGCC	59.57	CCCTCCTTTCATTCTCTTGG	58.71	TCCCTTCTCTTTAATCATTGCCTAATTTCATATTCACATTTTAATTTTAAATTTTAGAAAATAATGATTAAAAATTTAGTCTTTTTAGCATTTTCTTTGTGGGATTTTGTTATATTCTTCATATATATAAAAATAATAATAATAATAATAATAATGAAAAGAGAGAGTCAATATTATCATTAAAAATATAATTTTTTAATGTTGTTCATTATTTTTCCAAGAGAATGAAAGGAGGG
CmoSSR00117	p2	(TA)9	Cmo_Chr01	975555..976578	GACGGCAAATTAAAAGCCAA	60.07	TGTCTTCTCTCTCACAAGGAACA	59.12	GACGGCAAATTAAAAGCCAAAGCATTTAATTAACCAAACTATAAGCCAAGTATTCAAAAATTAAAATTATTAATAACCACAAACTATATATTATATATATATATATATATTAACATTAATATATGGTTGAAAACAAAATACAATCACATGATTAATCTTGATTTATATATTTAATCATAGTATGGATGCTTCATTTTTTAGAATAATATATTTTGTTCCTTGTGAGAGAGAAGACA
CmoSSR00118	p2	(AT)10	Cmo_Chr01	978609..979634	CAAACTCTTGTTCGTGTGCAA	59.94	CGAGGTACACCTCAGCAACA	59.9	CAAACTCTTGTTCGTGTGCAATTACAAAAAGTTCCCTATTTTGAAATATTTTTGTCCCATCCTTGTATGTTCTAAATGTCACAAAAAAACATATATATATATATATATATTTCAAAACTCTATATATATATTATTTATTTATTATTATTATTATTGAGTTTAACCCCTTTTTTTTTTTAAATATGAGGGATAATTTTGGAGGGAAAATAAGCTATTTAAAAAAAAAAAAGATGAAAACTCTCTGGAAAATGGGTGTTGCTGAGGTGTACCTCG
CmoSSR00119	p2	(TA)9	Cmo_Chr01	1010023..1011046	GCCCCGTCAAAATTTAAAGA	59.05	TCGCTATCATGTTCAATGACG	59.7	GCCCCGTCAAAATTTAAAGATTTTAAAATATAAATATAATTATTTAACTACAAATTTCTTTAATTTAAATTATTATTTTTAATTTTGTTTACTATCTACTCCATATACATTAAAATAGGTCAAAACAATGGGAAAGATTTTGAAACGTGACGAAAATAATAATAAATAATTAATTAATTAATTAGATTATATATATATATATATATTATAAAAAAACGTCATTGAACATGATAGCGA
CmoSSR00120	p2	(AT)19	Cmo_Chr01	1011359..1012402	CCTGAAAATTCTTGCTCCCA	60.18	TTGTCTCTGCTTCATCGTCG	60.14	CCTGAAAATTCTTGCTCCCATGGACCATTTGTATCTCTATGCATTAAAATCTCAATTCATGAATTTCTCGAAAAATTAAGAGGAAGAGGATCAAACCATTTCTTTTGATCCTTTTTCTTGATAATAGTGGGTTGATATATATATATATATATATATATATATATATATATATAATATTTTATTATGAATATATGAATAGGTTATTGATGAGTACACGGTGTTGTGGCAACGACGATGAAGCAGAGACAA
CmoSSR00121	p2	(AT)9	Cmo_Chr01	1023008..1024031	TGGACCAACTACTTTGTGATGG	59.89	GCGAGAATGTTATGTCGGAGA	60.23	TGGACCAACTACTTTGTGATGGTGAACACATATACATACATACACACATATATATATATATATATCATATACCCATGATCTTATAAGTATATCGTTTATGCAATTTTCTATTTTAAAATTTAGTTCAACTATTTGGTATTTAGCCTCGAACTAGTTATTGTCAGACTGTATTTGTTATCGTGTTGTTTACCTATTATTGAATTTCAACCGACTGATTTTACCTATTGTACTGACTAATCTTATTATAATAAAAAAGGGCTAATTCCTTTTTTTCTCCGACATAACATTCTCGC
CmoSSR00122	p2	(TA)14	Cmo_Chr01	1023342..1024375	TGTTCGGCTCTATCAACTCG	59.02	AATAAATGGGCTTGTCGTCG	59.96	TGTTCGGCTCTATCAACTCGAAACTAACGAGTATCTCTGTATATATATATATATATATATATATATATTTATTTATTTATTTATTTCAACTGAACTAATAAACTCTAAAATGATTATTGATAATTTTTTATTTTACATATTTTTAAATAAATGTTAAATATGGAAAGCTGTAAATGTCACATAGCACCATTTTTGTAGTATTGGACCCTTCGACGACAAGCCCATTTATT
CmoSSR00123	p3	(TTA)11	Cmo_Chr01	1026450..1027488	GATATGAAAATAGGTTGAGTTGTCG	58.23	AATTGCTTTTGTGTGGGACC	59.84	GATATGAAAATAGGTTGAGTTGTCGTTTTTCTAATTTAAAATATTTATAAAAAAAATTGGGTTTAATATTGAAACTTTTTGAAAACAATGCCAAATTAAATACTAAAATTGTAAAATTTAAATTAGTGAGTACAAGAACAACATTGACATATTAATTTATTATTATTATTATTATTATTATTATTATTATTGGAAAAGAAAGACAGTGAAAAAACAAGCCAAGCTCTTTAAAAATCTAAGTCGAAGGATTTGAAGGTCCCACACAAAAGCAATT
CmoSSR00124	p8	(AATAAAAA)3	Cmo_Chr01	1031405..1032434	AACGACGGGGAAGAGAAGAC	60.63	CCCTCCAAATCATGGACAGT	59.78	AACGACGGGGAAGAGAAGACCGACCTTTATAAATTCACAATAAAAAAATAAAAAAATAAAAAAAATAAAAAAAATAAAAAAAATAAAAAAATAAAAATTAAAGGATGGGATTGTCTTCGTAATTAAAGGTGATTTCAGCAATTTTCTTAATAATAATAAAAAAAAACATTTTAATTTTAATTTTATTTTATTTTTCTTTTCGTAATTCACTTTATTGAAATCGGGTAATCGGGCCGGAAGAGGAATTGGGCCGGAGTCCAACTGTCCATGATTTGGAGGG
CmoSSR00125	p7	(GAAAAAT)3	Cmo_Chr01	1040222..1041248	AGAAGTATGGATGGCAGCAGA	59.85	CAGAGGAAGCGAGGAATTTG	59.95	AGAAGTATGGATGGCAGCAGAAATATAAATCGAAAAATGAAAAATGAAAAATAAAAGAGAGAAATCATAATTATCAATCAAACACGATGATCGTGATATTCGACGACAAATTCCTCGCTTCCTCTG
CmoSSR00126	p2	(AT)11	Cmo_Chr01	1043583..1044610	ATTTGACGAAAGCAATTCCG	60.07	TAATGGGCCGCTTAGATTTG	60.05	ATTTGACGAAAGCAATTCCGATTCTTAAGAGTGTTTGAGAAGCATCTACAGCACTGTATCTAAATAAAAAAAGACTGGATATATATATATATATATATATAATCTTATTTTTCTAAATGTCTTCCCTTTCTATTTTGGGAGTATTAAAAAAAAAGGTGTAAAATAGAAAATTTGTTATATTAAAAAAAGAACTTACAAATTTTTATCAAATTGGATTACGGAAATGATGGGCCCAAATCTAAGCGGCCCATTA
CmoSSR00127	p2	(AG)16	Cmo_Chr01	1058867..1059904	AACACATCCCAAAGTACCCAA	59.2	GAGAGGGAAGGGGATGGTAG	59.89	AACACATCCCAAAGTACCCAAGTACATTCATGTACTCTCTCTCTCTAGGTTTATTCTTCATAGTCACGTGTCTTTAGAGAGAGAGAGAGAGAGAGAGAGAGAGAGAGATTATTATGTGAAGTGGAAGCAAAACTGTAGTTCTTTGTTATATAGAAGACAATGATTACCTTGTGAGTGAAGAAAAATTCAAAAAAAAAGACAAGAATTGAGTCAAAGACAAGAAGACCTACCATCCCCTTCCCTCTC
CmoSSR00128	p2	(CT)14	Cmo_Chr01	1059033..1060066	CAAGAAGACCTACCATCCCCT	59.45	ATAGAAGGCTTCATGGCGTG	60.24	CAAGAAGACCTACCATCCCCTTCCCTCTCTCTCTCTCTCTCTCTCTCTCTCTGTTCACAAAGAGACACATACACAAATGGAGGTCCCCCTCCAATCCGTTTTCCACTCCACCTAGCAACCAACCAACACAATCTTCTCTCTCTCTCTCTCTTTCTGGACACAAATATTCACAATTCAAATTCATGTTCTTCAAGCAACAAAGGCGTCCCCAACCATCTCCATCATCATCACCCTTACCACGCCATGAAGCCTTCTAT
CmoSSR00129	p4	(ATAA)5	Cmo_Chr01	1061864..1062889	TGCATGCAACATAGCAACAG	59.46	CCCAGCGTTGAAACAAAAAT	59.97	TGCATGCAACATAGCAACAGATTATCAAGTATATATTAAAAATATTATTTTTCATGAAGGTAAAATTTAGTATTTGAACTTTAATTTTATAACAATTTAATCTTATTTTTAAATTTATAATGATTTAATTTTTTTGCGGTATTATGTAACAATTTAGTCCCTGTAATATTCGGTGGAAAATGAGTTTACATAAATAAATAAATAAATAAAAAGGATTATACATATTTGGGATAACTTTGACTCTTTAGAAAAGTTTGACACAGTGTGGCAGATTTGTAATTTTTGTTTCAACGCTGGG
CmoSSR00130	p2	(AT)11	Cmo_Chr01	1062607..1063634	CTCATTCGGCTGTGGTTTCT	60.25	CCTCTCATTTACTCTTCCCTCAA	58.9	CTCATTCGGCTGTGGTTTCTGTTCATTCATGTTCTCCTCTTTTACTCGAGTGTCGCACTTTTTCTAAAAGAAATACTTACTTTTGTACAAATAATAAAATATTAATATAATGTATATGAAATTTATTTAAAAAAATGAAAATTTCCCATATATATATATATATATATATAATATGATGTGTAAATATTGAGGGAAGAGTAAATGAGAGG
CmoSSR00131	p6	(GATCGT)4	Cmo_Chr01	1063721..1064750	GCCTTTCACCACTACGGAAA	60.11	ATCTCCCAAGCATACAACCG	59.96	GCCTTTCACCACTACGGAAACACCCATGATATGAAATCACTAACCAATCCCTTCCCCTCTAAACACTTGGGGATTTTAAAATCTTCCATTGAATCGATCGTGATCGTGATCGTGATCGTGCGTTCGTACGAAATATGTAAGGACAATTGATATTTTTGTATTTTTCATAATCATATGATATGGTTTGTTTAATTTGATCGTTTTAAGTAATATGTATTTGCTACTGATTGTTCGTAGAAATATTCGGTTGTATGCTTGGGAGAT
CmoSSR00132	p2	(TA)16	Cmo_Chr01	1068099..1069136	GAATCCTACGAAGCTCCCAA	59.27	GAATGAGCGATAATCCAATTCA	59.04	GAATCCTACGAAGCTCCCAATTTGGACTTGGGAAATAAAGATTAGGTTATCTACCAACTTCAAACCACTTAGTAAGTTTAAATTATTCTAATGTATGTATATATATATATATATATATATATATATATATGAAAAATATAATGCATACCCTAAAAGTTAGGAACTTAAAATAAATATGATATATTTTTGTATAAGGGTCACTCTAATATGTCATATGAATTGGATTATCGCTCATTC
CmoSSR00133	p3	(ATC)14	Cmo_Chr01	1075848..1076895	TCCTTCCTCTTCTTCCTCCA	58.94	ATAGGAGCTTGGCTTGAGCA	60.12	TCCTTCCTCTTCTTCCTCCATATCATAATCATCATCATCATCATCATCATCATCATCATCATCATCATCCTCCTCACCTCTCTTAGAACCCTTCAGCTTCACCTTACCCAGAAAGAATTTTGGGGAGAAATACCTATCTTGATGAGTAAAATGAAAATGGCTTTATGTTCTTTGTTGTGCTACACTACAAGCTGATCAAGCTGCATCTGCTCAAGCCAAGCTCCTAT
CmoSSR00134	p6	(AAATAA)4	Cmo_Chr01	1089601..1090630	AGCACGAAGATTGACTCGGT	59.87	CCAGCGAGAGAAAAATGGAG	59.95	AGCACGAAGATTGACTCGGTGTTGCGTTTAAGGCCACCTCAAATACTCGGATTTCTTTTCTTTTTTAATTTTTTTAATTTTCACCATACGAAAAAACACGAATAAATAAATAAAAATAAAAATAAAAATAAAAGCTCAACACGACAAACAAACCAGAGCTTCTTGTTCTCCATTTTTCTCTCGCTGG
CmoSSR00135	p3	(AAG)7	Cmo_Chr01	1089726..1090752	CTCCATTTTTCTCTCGCTGG	59.95	GCCGCATTTATGATCTTGGT	59.93	CTCCATTTTTCTCTCGCTGGGGCAAGCTTCCATTTCTGCACAAAGGAGAGCTCAAGGAGCTTCATAAGAAGAAGAAGAAGAAGAAGATCAAAAGTCATGAATGCCCCCGACCGATACGAGCGATTCGTCGTTCCAGAGGGGACTAAGAAGTAATTTGATGAACTCTACTCCTCTCTCAATACAGAGCAATTTTCTCAATCTCTTACGTTTTTGCTTGCTTTTTTCCTCTTCAGGGTCTCATACGAGAGAGATACCAAGATCATAAATGCGGC
CmoSSR00136	p8	(AAATAAAG)3	Cmo_Chr01	1099913..1100942	ACGCATCCCGCTTATTTTTA	59.59	GAGGATAAGGCTACACCCACA	59.07	ACGCATCCCGCTTATTTTTATTATTATTTCTTTTTAAGGATTTTCATATTAAATAATCGCTGAATCAATTTTATTTAAATTACAAATTAACCCTAAATTTAATTTAATTTCATTATCATCCTAAATCAACTACATATTTGTATTTGAATTTAACTTTAACACAAAATAAAATAAAATAAAGAAATAAAGAAATAAAGAAAATTAATCGAAAAAATAAAATAAAATAAAATAAATAAATAGCTTGTGGGTGTAGCCTTATCCTC
CmoSSR00137	p5	(AAAAT)4	Cmo_Chr01	1099950..1100975	ACGCATCCCGCTTATTTTTA	59.59	GAGGATAAGGCTACACCCACA	59.07	ACGCATCCCGCTTATTTTTATTATTATTTCTTTTTAAGGATTTTCATATTAAATAATCGCTGAATCAATTTTATTTAAATTACAAATTAACCCTAAATTTAATTTAATTTCATTATCATCCTAAATCAACTACATATTTGTATTTGAATTTAACTTTAACACAAAATAAAATAAAATAAAGAAATAAAGAAATAAAGAAAATTAATCGAAAAAATAAAATAAAATAAAATAAATAAATAGCTTGTGGGTGTAGCCTTATCCTC
CmoSSR00138	p2	(AG)9	Cmo_Chr01	1105363..1106386	GTCTCCCAAACGTGGAGTGT	60.01	ACGTTGAAAGCGGAAGAAGA	59.99	GTCTCCCAAACGTGGAGTGTGCGCTGTCAACCAGAAGAGAGAGAGAGAGAGAGATTTTCGTAGCCGGCCATTCGATTCATCACTGCATTTACTGTTCTTGTTCGTCCCTGATTTGCTCTATAAAGATTCCTTTTCAAATTTTCATCCATTCAGACATCTGGTTTTGTTTCTCTCTCAGATCTTCTTCCGCTTTCAACGT
CmoSSR00139	p5	(TTATT)4	Cmo_Chr01	1123885..1124910	TCCACATTCTAGTGGGTTCCTC	60.36	ATCCACGTCACCTTCGAGAT	59.54	TCCACATTCTAGTGGGTTCCTCCTTAAATTATTTTATTTTATTTTATTTTAGGGGAAAAAATACAAATAGAAGTCTATTTCTCTCAATATCACTTTTAATAATTTTAGTAAATAAAAATCAATTAAAAAATATATTTTAATGCATTATTGTTGGTTTATTTAGCATTGGAATTTCTTAAATTTAATAAAATGTTTATTATGTGACAAGACAGGTGTACAACAACTAGTGGTGCATATCGAATCGAATATACACGTGTGTGGCCTAGATATCTCGAAGGTGACGTGGAT
CmoSSR00140	p2	(AT)23	Cmo_Chr01	1157392..1158443	CGAGTTGATCACATCCGTCA	60.69	TTTGACCGGTTCATGCCTAC	60.89	CGAGTTGATCACATCCGTCAAACTCATCTCATTTCAAGTTAAATAATTGTTTTTACATTTTCAAGGAAATAAATAAATAAATAATTGGATTAAATTGTACTTGTTACAAAATGTGTAATATTTAATCTTTTATTTTTATAAATATTAAAATATATATATATATATATATATATATATATATATATATATATATATAAACACTATTTAAAAAAAATTAATCTAATTTTATCTTAAGCTTTTTTAATTAATTTATTTAAATCATATGTAGGCATGAACCGGTCAAA
CmoSSR00141	p2	(TC)13	Cmo_Chr01	1168792..1169823	GCCGGTCAACGGTAATAATTC	60.56	GAGTAGTTCAACCTCCCTCGG	60.12	GCCGGTCAACGGTAATAATTCTGTTCTCTCTCTCTCTCTCTCTCTCTCTCTAAATTTAGAGAGAGAAAATGAATTTGGAGATTGAAAAGAAGATAATTGTGAGATTTATATAGATATTGTCTCTACTTTTTTTCAATTTAATCACTTTTTTTAGATTTAAATTTCATTTTAATCCTCTAACTTTTCAAATTCTTTCATTTTAGTCCTCATCATTTAAAAAAAAATTAAAATTATATTAAAAATTTGTAATTAAAAATTTTGGGTAATCGCCCGAGGGAGGTTGAACTACTC
CmoSSR00142	p2	(CT)19	Cmo_Chr01	1184654..1185697	CCCAAACTCCCAAAGACAAA	59.94	TGGAGATGATTGGGAGGAAG	60	CCCAAACTCCCAAAGACAAATACTCTCTCTCTCTCTCTCTCTCTCTCTCTCTCTCTCTCTACTGCACTTCTTCTTCTGAAATCATCTCCATTTCCGGCACCGGCTTCACCTCTCCGACCACCAATCACAAATTCCCATCCCTAAATCCTTCAACCAAACTTCCTCCCAATCATCTCCA
CmoSSR00143	p3	(TTC)12	Cmo_Chr01	1202003..1203044	AAGGAAGCAAGAACAGTCGG	59.47	GGACGAGGAGGTTTCAACAA	60.09	AAGGAAGCAAGAACAGTCGGCGGCTACTGGCTGTGCTAACTAACACACACACTATTACTTAAACATGTCTGTCTTTCTTCTTCTTCTTCTTCTTCTTCTTCTTCTTCTTCACCTTCACCTGCCAAAACTTTGTTTTTCCCTACCATTTGCTCTCCTCTTCTCTTCTCTTCTCTTCTCTTTCAGTCATCAATCATCACCGAATGTAGTTTTCTTTCCTGATGCAACTATGCTAGGTTTGTTGAAACCTCCTCGTCC
CmoSSR00144	p5	(CTCTT)5	Cmo_Chr01	1202083..1203113	CACCTTCACCTGCCAAAACT	60.15	GTGGTGGAAGAAGTGGAGGA	60.09	CACCTTCACCTGCCAAAACTTTGTTTTTCCCTACCATTTGCTCTCCTCTTCTCTTCTCTTCTCTTCTCTTTCAGTCATCAATCATCACCGAATGTAGTTTTCTTTCCTGATGCAACTATGCTAGGTTTGTTGAAACCTCCTCGTCCTCCTCTACCGCCTCTCCCGCCGCGATCGCCGCCTCGTCCTCCTCTGCCTCCGAATCGTCCTCCTCCTCCTCTGCCATCACCACCACTCCATCCTCCACTCCTTCCACCACTTCTTCCTCCTCCACTTCTTCCACCAC
CmoSSR00145	p2	(AT)25	Cmo_Chr01	1209491..1210546	AAATCGATTAAGAAGTCGTGGC	59.64	TTTGCGAACCAATAACATGG	59.42	AAATCGATTAAGAAGTCGTGGCTATTAAGTTCAAATTGTTTTATTTTTTATTTTTTGTATATCCATTCCTTCTTAATTTTTACGTATTTCTATGAAGATTAGAATATTTAATATTTTAGTCAATAATATATATATATATATATATATATATATATATATATATATATATATATATGATAATTAAATTAGATTGTACTAATTTATTTACCAATTACTCAGTATTAATTATACCATGTTATTGGTTCGCAAA
CmoSSR00146	p2	(AT)9	Cmo_Chr01	1209912..1210935	TGACCAGAAATGATTCCCAA	58.9	GGAAACTAACTCTCGCGGAA	59.45	TGACCAGAAATGATTCCCAAGTTAGTTTCTCCATAAATAGAAAAAACAGGTTGACAAATATATATATATATATATAAAAATAAAAAAATGAAAATTTTATGAGCCTGATAATTATTCCTATACTATAGGTTTAAAATTGGATAAATAATTTAATTTGTTATTGTGACAAATGCCACGTGTTGATTAGGTATTGGGTCTTAAAATTATATTATATGTTTTTGAAGAGACGAGATTTTCCGCGAGAGTTAGTTTCC
CmoSSR00147	p2	(TA)10	Cmo_Chr01	1226830..1227855	CCATACACACGCACACACAA	60.07	CTTCTCTTCGTCATAGCGGC	60.12	CCATACACACGCACACACAAATACCAAAAAGGCAAAAGAAAATTTACGGGACATGAGGGCACAAAAATGGAATGAAAATCGAGCATCTGAATGTTTTAAAAGTCTAGTTTATTTCAAACTAAAAATATTACTATTAGTTTCTGACTCAATATACCCAATGAATTGATAACAGAAGTTGTCTTTCATTTCCTAAAATTTTAAATTATATATATATATATATATATTTTAAAAGCTAATTGCTACCTCAATGTGCCGCTATGACGAAGAGAAG
CmoSSR00148	p3	(TAA)7	Cmo_Chr01	1257894..1258920	CAAGCAACTGACAGCTCCAA	60.18	GCCATAACCAACTAGGCACG	60.52	CAAGCAACTGACAGCTCCAATAATACTAATAATAATAATAATAATAAAACAACTCAATGATTTAGTCCCTTAATTATAGTGAAATTATATAAATTAATTTATGTAGCTGTCTCGTGCCTAGTTGGTTATGGC
CmoSSR00149	p4	(AAAT)5	Cmo_Chr01	1258597..1259622	CAATTGACAGCGAGGAGAGA	59.11	TTTCAACCACTCCCATTTCT	57.08	CAATTGACAGCGAGGAGAGAGAAAATTATATAAAAAGACAAGAGAAAAAAATAAAGGTAAAAGCAAAATAAATAAATAAATAAATTTATGGTTTTTTTTTTTTTTTGTTAAGATTTTAGAGAATTTCATTTAATCACTTTTTTAGAAATGGGAGTGGTTGAAA
CmoSSR00150	p4	(AAAT)5	Cmo_Chr01	1258721..1259746	AGAAATGGGAGTGGTTGAAA	57.08	TGCAGCACGAAAACAACAAT	60.3	AGAAATGGGAGTGGTTGAAATTATGTTTTCACTTTACAACTTTATGAAATAAATAAATAAATAAATAAGATCGTCGAGATCTTAAATGTTGACTATATCGATTCAACAAAGTAATTAGAAAATCGATAATTTTATTGACTAATTTCATTCCATTATTTTTTTTTCAAAATACAATATTTTTAATGTTTTTTAATCCTTTATTCGTTGTTTTGAATTAATAAGTTATTTTAATTGTTGTTTTCGTGCTGCA
CmoSSR00151	p5	(TCCAA)4	Cmo_Chr01	1260535..1261560	AAAAAGGCCCAACTAAAGGG	59.48	TTGGCTCTTCTGCTCTGACTT	59.37	AAAAAGGCCCAACTAAAGGGTTCTACTCACAAGAAAAGAAACTTTTGTTGAGAAAGATGAAGATATAAAAAGGGCCTACAAAAAAGACCCAACTAAAGGAAGGACTCCAATCCAATCCAATCCAAACCAAAAGAATAAAACTTAGCTTAAAGTTGCTGATTAGTCCGTTTAAACAAATTCTGAAGTTGCAGATTCACCATATGGAAAGTCAGAGCAGAAGAGCCAA
CmoSSR00152	p2	(CT)14	Cmo_Chr01	1261083..1262116	CTTCGCCAACTTCCTCATTC	59.81	GCCTCCTCTCCCATCAATTC	60.94	CTTCGCCAACTTCCTCATTCCCACCTCTCTCTCTCTCTCTCTCTCTCTCTCTAAGATTCTCAGAAAGAAAAAAAAAAGTTCCTGGTCTTCCTTTCTCAAGGAAAATTAGATTCAAAAAATTGGCAACCATATGGTAGCTCATGAGCTGTACTATAAGATTGATAGAAAATTTAGCTTCTTAAAGAAGCTTTTAAATGATTTCTTCATAATGCATCATGAGTATCGACTTTGAGAATTGATGGGAGAGGAGGC
CmoSSR00153	p2	(TA)9	Cmo_Chr01	1264386..1265409	TTCCCTCCTCAAAGGGACTT	60.04	GACCCGAGCTATGCAACAAT	60.1	TTCCCTCCTCAAAGGGACTTTATTGCCTCCCTTTTTTCCCTCTTATATATATATATATATAATTTTTTTAAAAAAAAAAAATTAATTAAAAGTCTTGGTCAATCCAAAAGTAATTAATAAATTCCATAGATTTTATATATATATATTTTATAGTGCATGAATCTAAACTTTCACCTGTCAATAATTTTTACAAATATTTAAAAATTTAACTTATTATTTTTATTTAAAATAATATTTTAAAGCAATTGTTGCATAGCTCGGGTC
CmoSSR00154	p2	(AT)12	Cmo_Chr01	1265531..1266560	CATAAACGAGCACAGCCTGA	60.01	CCAAGGTGTACCTCAACGCT	60.17	CATAAACGAGCACAGCCTGAAAATATATATATATATATATATATATTTTTTTTTTTAATCTAATGAGTTTTAAATATTTCAAAAAAACACGTCTTAATCGAAATGCTAGAACTAGTATCTCGACGTTGTACCATTGCCGAAAAAAATTATAAAAATTTAGGCAGCATCGAGACACTCGATGTAGTGTCTCGATGCTACAAACAAAAAATTAAATAATGCACGTGTTCCATAGCGTTGAGGTACACCTTGG
CmoSSR00155	p5	(AAATA)4	Cmo_Chr01	1267809..1268834	ATGACTCGCTCGTGACCTTC	60.42	CCCCACTTACCCAAAATCAA	59.66	ATGACTCGCTCGTGACCTTCGTATAAAACACGGTTAACTGTTTAATATGCTATTACTTTTACTTGAAAAATAAACTAGTTAAAGTCACTCAAATTTTTATTTATTTATTTATTATTATTATTTTTTTGGCTTGGCTAAATCTTAAGTAAAAATAAATAAAATTAATTTTAATTTCCATATTATTTTTTATCCGAAACAAATAAAATAAAATAAAATAAAAACAATTTATTTATTCAATTATTGATTTTGGGTAAGTGGGG
CmoSSR00156	p2	(AT)15	Cmo_Chr01	1268088..1269123	AAAACACTCCACGTCAACCC	59.87	CGTTTTAAAATCGTAATGGGTC	57.66	AAAACACTCCACGTCAACCCAGCTATGAATTCCGACATATTTTCCCTTTTTTTTTTTTTTCTCTCTAAATGATAATGATTATTATTTATTATTATTAGTTAAATGCTCTATTTAACTCTACCTTTAATTTTAATTTCGTAGTAAAATAAATATATATATATATATATATATATATATATAAATTTAAGTATATTTTTTGTTTTGACCCATTACGATTTTAAAACG
CmoSSR00157	p2	(GT)13	Cmo_Chr01	1283416..1284447	TATCTTCGTGTCATCGAGCG	59.97	CCGAGAGAAATTCCGACAAA	60.18	TATCTTCGTGTCATCGAGCGCCGATTCCTCTTCTTTGGGTCTCTTTGCTCTGGAAGTTCGCCTGGTTTTCCTTTTCCAGGTTCATTCTCTCTCTTTAATGGCTTCCTCTGTGTTCGTGTGTGTGTGTGTGTGTGTGTGTGTGAGTTGAGGGAGAAATGGATGTTTCTGCTTTTGAAGTCATTGGGTCTTGTGTTTGTTTGTTCCTACTTTTAGGGTTTCTGAAATTTTGTTCGTTTTGGGTTTCATTGTGTGGGGATGCTGTTGTGTTGTATTTGTTTTTGTCGGAATTTCTCTCGG
CmoSSR00158	p2	(TA)9	Cmo_Chr01	1298866..1299889	AGAAGCGGAACGAGAAAACA	59.99	TCAACCCGACACAACCATTA	59.82	AGAAGCGGAACGAGAAAACACCAAAACACTACATGAAAACAGAATAAAAAGACACTAAAACACTACATGAATCTCGTGTCATAAGCTTTTGTATATATATATATATATAGCCCCAAAAAAATTATGAAATTTAGTTAAAAAGAGATGTACAATTGAATAGTGTTTAAACTTGGACCTTTTCATTTTTGTTCACCTAAATTGCTATTGGAAATGACAAATGACGATTTTAGACATGTTCTAATGGTTGTGTCGGGTTGA
CmoSSR00159	p7	(AAAGAAA)3	Cmo_Chr01	1306936..1307962	TTAGTTTCATGGGCTCCTCG	60.21	TTGGAGAATAATGGTGCCAAC	59.81	TTAGTTTCATGGGCTCCTCGGCGATGCTTGCTTGGCAAATGCCAAATGAAATGAGATAAAAATTACTTTTAATTAAAGGATAATTCAAATTTATGGTAATTATGATTCCAAATGATTTTTTCATTATTATTGGAACCCTAAAACTAAAGAAAAAAGAAAAAAGAAAAAAAAAAACTATTTTTCACAACCAATTAGTCAAAGTTGGCACCATTATTCTCCAA
CmoSSR00160	p5	(AATAA)5	Cmo_Chr01	1307163..1308193	AGTTGGCACCATTATTCTCCA	59.44	TGCGCATTTAGTTGGTCAAA	60.25	AGTTGGCACCATTATTCTCCAACTCTTACGTCATTGTGCTTACGTCATCAAATTCCTTATTTATTTAATTTAAAATAAAAATATATACACAAAAAATAAAAACAAAATATTTATTTACCCTAAGTCGTTATTATCATTGTGAGAATTTGACAAACTCAATGCATAAAGAATAGAATAAAATAAAATAAAATAAAATAAGATAATTAAAATTAATTATTTACGAAATTAAATTAAAATAGGACGTTCACAAGTACCTGTAATTTTGACCAACTAAATGCGCA
CmoSSR00161	p3	(TAA)8	Cmo_Chr01	1307311..1308340	CCTGTAATTTTGACCAACTAAATGC	60.17	GTTTCGAGGGCTCTTCACTG	59.99	CCTGTAATTTTGACCAACTAAATGCGCATTTTCCATTTTTTTAAAATAATAATGAATAAAATAAATAGTAATAATAATAATAATAATAATAATTCTCCCTATAAATACTCTGTTCTGTGCAGGTCTTCCCAGTGAAGAGCCCTCGAAAC
CmoSSR00162	p6	(ACAAGA)4	Cmo_Chr01	1313822..1314851	GCTCAAAACAAGGAAATGGC	59.69	TGCTTGTTTCTCTGCACACC	60.03	GCTCAAAACAAGGAAATGGCAAAGAAATTACATGATTCAATGGCTTAGAGAGAGAGTACAAACCGATTCAAAGAAGGTTTAGCAAGAAAAAGAGACAAGAACAAGAACAAGAACAAGAACACAAAAAGAGCTGAAATCTGAGAAACAGAGGAAATGGGTGTGCAGAGAAACAAGCA
CmoSSR00163	p7	(GAAAAAG)3	Cmo_Chr01	1320256..1321282	CTAAAGTCGTCGGGATTCCA	60.07	TGAGTCAACTCTTGGTGGGA	59.23	CTAAAGTCGTCGGGATTCCAGATGTACTATGTTTCTAGCAAGCCATTTTAAATGGGGAGTGGAAGAAAAGTTTGAATTTTGAAAAAGGAAAAAGGAAAAAGGTTTTAAATTAAGGGGGAAAAAATGAACTTTTCTTTCTCTTTTATTGGATGCCTCTTTTTTTTTCTCCCACCAAGAGTTGACTCA
CmoSSR00164	p2	(TA)14	Cmo_Chr01	1325794..1326827	CTCAATGGCAATGAATTGGA	59.47	GTTGGAAAGTTGCCACGAGT	60.16	CTCAATGGCAATGAATTGGATAAACGAATAAGGAAATTGATTCTTGACCTTTTTCTCAAAAATACTACTTTTTTTTAGTTGCAATATTATATTTAATTTTGATTATATATATATATATATATATATATATATTTTTTTTTTTTTTTGGCAAAATGCATTTTTAGTATAACAAAATGTTTTTTTTTTTTTCTTTTTAAGATACAAACTTAAATTTTTTTTTCAAACAAAAAAATTTCAATATGGTCTCTTACTCGTGGCAACTTTCCAAC
CmoSSR00165	p2	(AT)14	Cmo_Chr01	1331168..1332201	GGCAAAACACGTTGTTCAGA	59.74	GCCCTTTCTTCAAATCCTCC	60.02	GGCAAAACACGTTGTTCAGAACTTCCCCTGTTTTCCCCATCTCTCTCTCTCTATATATATATATATACACATACATATATATACATACATATATATATATATATATATATATATATTGGTTCAATTCTCCCCCAAAGAAGCCCAAGTTCCATCTTCTTCTTCCTCTGGATTCTGATTTACAGACAGAGCTTTCTAAAAGGGTTCCAATGGAGGATTTGAAGAAAGGGC
CmoSSR00166	p5	(TTATT)4	Cmo_Chr01	1331660..1332685	CTGCGGTGGCTGAATTATCT	60.24	CGTCGCAATTCAGCTGTTTA	60.01	CTGCGGTGGCTGAATTATCTCCGCCCTAATGTCCGCCGCGGCAATATCACTCTTCAGGAACAGCTTCTCATTCTCCAACTCCACTCCCGTTGGGGCAACCGGTAAGTTTTTTTTTTTTTTTTTAATAATAATAATTATTATTATTTTATTTTATTTTATTTATTTATTTCGATTTGGTTTTTTTAGGTGGTCGAAAATAGCTCAATTTCTACCGGGTAGAACGGACAATGAGATTAAAAATTATTGGAGGACGAGAGTTCAAAAGCAAGCTAAACAGCTGAATTGCGACG
CmoSSR00167	p4	(TTTA)5	Cmo_Chr01	1338541..1339566	ATTGGTTAATATGCCACGCC	59.69	GAAGCCGATTTTGTTGGGTA	59.94	ATTGGTTAATATGCCACGCCCACGTCACCATATATTTGGTCTTTTTTGCAAAATTGCCCCACTTTATTTATTTATTTATTTAAAATGGACTTATAAATGAGCTAACTACATATGCTATTAAATAAAGAAAACAACTTAATTTTTAATTTGATAAATAATTTATTATAAAAAAAACACGTAGCATGCAGTTTGACAATGAGTTTTGCCAATTAGTTGTCATTCTTTGATTAAAATTGACTTTTTTTTTTCTCCATCGTTAATTTTACCCAACAAAATCGGCTTC
CmoSSR00168	p2	(TA)15	Cmo_Chr01	1353535..1354570	GCAATGCTTGTGGAGGTTTT	60.12	GGGGTTCATTAGACACGTTTAGA	59.42	GCAATGCTTGTGGAGGTTTTATTGTATGTACTCTCTGCTCAATTGTTCTTTCTAGCTTGCTCCCTATTACTTAGATATTCTCTCATTTATATGTGTGTGTGTGTATATATATATATATATATATATATATATATCTATATGTTGAATTACAAATTTAGTTGATAAACTTCTAAACGTGTCTAATGAACCCC
CmoSSR00169	p6	(TCTTCG)4	Cmo_Chr01	1355722..1356751	ATGATCCAGTGCGGAAACTC	60.08	GGATGGTGATTGGGGTATTG	59.87	ATGATCCAGTGCGGAAACTCGCACCGAAGTTTCCGTGGTCATCTCTCTTTCATCTCGCGCGCTCTTCGTCTTCGTCTTCGTCTTCGATTCTGCATCGCTTGTCCATCCTCAGGCCTCGAGTAATTTTACGTTGTTTCGATTCCAATTCTTCGAAACTGGAGAGACATCGCCCAACTTCTTCGGCGCCGCCGTGGCCATCCGACGACCACCGCCCCAATTTCAACCACCAGTTTGATCCCTATGTTCAATACCCCAATCACCATCC
CmoSSR00170	p2	(AT)10	Cmo_Chr01	1363790..1364815	CATTAATGGTCAGTTGTGGGC	60.24	ACCCAAACCCTGCTTTTCTT	59.98	CATTAATGGTCAGTTGTGGGCTAATAAAAATAAAACTAAAATCTGTATTTTTAAACTTAGGCTAATATATATATATATATATATAGATATATAGATATCTATGTCTAAACGTATTGTAAAGTTTATTTTTTTTACTCCTGTTTGAGCATGTGAGGAGGAACAACATCTTGAAGCAGCCCATGGTCGGCAAGAAAAGCAGGGTTTGGGT
CmoSSR00171	p7	(TTAAAGC)3	Cmo_Chr01	1372268..1373294	CCCTTTTCTTGCATAGCTCG	59.97	CATCCAGCTTGCGTTTGATA	59.83	CCCTTTTCTTGCATAGCTCGATCTCCGATTCAAAACAACAAAAATGGGGTTTTTATAACCTAAAAATTGGGTTTAAAGCTTAAAGCTTAAAGCTTTTGCATAAAATTGGTAGAGCATGTTAGGAGGTGATGCAGCCACATGATTGTTTTATACCCAATCTAGAACCCTAGAAATGAAGCATGTGTTATCAAACGCAAGCTGGATG
CmoSSR00172	p3	(GAA)12	Cmo_Chr01	1388679..1389720	TATCCCGTAAAAACCTCCCC	60.01	CAATAGCGAACTGCAGACCA	60.01	TATCCCGTAAAAACCTCCCCTGCACTCTCACTGTCTCAGTCACTTTGTCAGGGAAGAAGAAGAAGAAGAAGAAGAAGAAGAAGAAGAAGTTCCCATAACTTTCTCTTCGTCCTTTCAATTTCGCTCTTTCATTCATTACTTCATTCATTCATAGCTTCTGCTTTTTGGGTTTCGTTTCGATTCCCTTCTCGGTGATGTTACTACTCCGCTTTGGTAATTGTTCTTCGTTGGAGCGAGTGGTCTGCAGTTCGCTATTG
CmoSSR00173	p7	(CGGGACT)3	Cmo_Chr01	1389663..1390689	AGTGGCGAAAAACAAGCACT	59.92	TCCCCCAAAGGTATGTTTCA	60.16	AGTGGCGAAAAACAAGCACTTAAGGCAAAAGGATGCTTGTCTAGAATTTGGGGATGGAGTAAACATTTTCATTGAGGGGGAAAAATTATATGTTTTTAAAATCTGTTGATGATTTAGGGGCTAAATTAGAGATGAAATTTTGAAATCTTTAACTTTTTATATAATTTTTTTAATCAAAGGCAAATCAAGAGCGGGACTCGGGACTCGGGACTCGTTCCTTCTTCACTGTACTCCACTGGTAATGAATTAGTGAACTCCTTGAAACATACCTTTGGGGGA
CmoSSR00174	p3	(TCT)13	Cmo_Chr01	1403665..1404709	GAAAGGTTGAGGAGATGGCA	60.2	ATGGTCATCCAAATCAAGGG	59.61	GAAAGGTTGAGGAGATGGCAATTCTTCAAGTTCATCAAAGAAATGATCATGATTTTCCACTTCTGTCTTGTTTGCCTTTTCCTCTTCTTCTTCTTCTTCTTCTTCTTCTTCTTCTTCTTCTTCCATACTTAATTCTTCTTCTTCTTCTTCTTCACTTTGATCTTGATCTTGCTTTTCTAGCCCTTGATTTGGATGACCAT
CmoSSR00175	p3	(TTC)7	Cmo_Chr01	1403715..1404741	GAAAGGTTGAGGAGATGGCA	60.2	ATGGTCATCCAAATCAAGGG	59.61	GAAAGGTTGAGGAGATGGCAATTCTTCAAGTTCATCAAAGAAATGATCATGATTTTCCACTTCTGTCTTGTTTGCCTTTTCCTCTTCTTCTTCTTCTTCTTCTTCTTCTTCTTCTTCTTCTTCCATACTTAATTCTTCTTCTTCTTCTTCTTCACTTTGATCTTGATCTTGCTTTTCTAGCCCTTGATTTGGATGACCAT
CmoSSR00176	p2	(AT)19	Cmo_Chr01	1405508..1406551	ATACCCGTGTTCGCATTTTT	59.34	TTTTCATAAATGGCTTGGCA	59.15	ATACCCGTGTTCGCATTTTTTATGTGTTGTTCATCCAATTAAAATTTAAAATGTTATTTTTTTTCTTCTAAATATTTGAATGATGTGATATATATATATATATATATATATATATATATATATATTCATGTAAGCAATTTATTAAAAATTTTGTAAAAATACTTGAAAGTATTTTTAAAAAGTATTATTTATTTATTATTATTATTATTATTTTGCCAAGCCATTTATGAAAA
CmoSSR00177	p2	(AT)18	Cmo_Chr01	1406557..1407598	GCCAAAATTACACAAGGCCA	60.87	CTCTTGGGCCTATTTGTGCC	61.87	GCCAAAATTACACAAGGCCATAATCAATTCTTCATGCAAATTCTTAGCCAAATTAGGCGTAATCTAAATAATATTTTAAAATTTTAGAATAAATCTATACTCAATTTAAAAACAAATACATACATACATATATATACATACATACATATATATACATACATACATATATATACATACATACATATATATACATACATACATATATATATATATATATATATATATATATATATATAGAAAATTAAATTATAAAATATTAAAAAAAAAGATCATGGCACAAATAGGCCCAAGAG
CmoSSR00178	p2	(AT)11	Cmo_Chr01	1406852..1407879	CCAAAAATACTTCATTGGCCC	60.53	TGGTATCGCAAAAATTGACG	59.56	CCAAAAATACTTCATTGGCCCAACTACTTATATAAGTCTACGAAATAATTAGTTTGAATTTTTTAATTCAAAAAATAAAAATTAAAAAGAAGAAAGATCTAAAATAAAATAATTTTAGTCTCTATAATTATGATATTAGATTTTCAATTTAATGGATAAATCGATAAAGTATCAATATATATTGCTATAAATATATATATATATATATATATTTAAATGAAGGTTAATATATATAAAGTTTCTTCGTCAATTTTTGCGATACCA
CmoSSR00179	p2	(TA)29	Cmo_Chr01	1416633..1417696	GGGTAAAAGGATTGGAGTTGG	59.69	CCAGCTTAGCTTACCTTCGC	59.27	GGGTAAAAGGATTGGAGTTGGTTGAATGTATTTACTGGAATAACTTAATCATTTTTTTGCTTATATATATATATATATATATATATATATATATATATATATATATATATATATATATAATTAGGATACTTTGTGAACTGGACCCTAAACTACAAATTCCATTGCAACATTATTCTAAATATTAGAAGCTTTATATTTCCACAGTATGTTCTAGATGCCTATCGTAAAGGAGACAAGCTAAAGTTTGCAAATCATTCATCAAACCCCAACTGTTACGCGAAGGTAAGCTAAGCTGG
CmoSSR00180	p8	(GAAGAAAA)3	Cmo_Chr01	1418639..1419668	CGTTGATCTATGCCATTTGTC	58.11	TTTGACCTGCTTACCCCTTG	60.1	CGTTGATCTATGCCATTTGTCAAGAGAAGACTATTATAGAGAACATGATTATTTTATGAAGAAAAGAAGAAAAGAAGAAAAGAATCAGGATATTGTGGAAGAGGAATAAGACGATTTAACACATTGGATAAGCTAAATTGCCCACGGAACCAAGGGGTAAGCAGGTCAAA
CmoSSR00181	p4	(TATT)6	Cmo_Chr01	1434553..1435582	GCAGCATGGATGTTTTGCTA	59.84	CCCCAGTTTTCACATAAGGC	59.43	GCAGCATGGATGTTTTGCTAGTAATATATGAAAACTCCTTGAACTCTGATACTCTTTTCTTGAAGAAGTCACTGATAATTTTTTTTTTTAATATTTATTTATTTATTTATTTATTTCGTCGTTTTTGAAGTACTAGTATGAATTTTGTTGGCATTGCTATGAAAACTAACCCATATCTACTAATTGTATGAAAACTCATTGAACTTTGATTATCTTTTCTTGTAGAAACTATCAATGATCTTAATATCACTTTTGAAGTACTAGTCTGAATTTTGTTGGCCTTATGTGAAAACTGGGG
CmoSSR00182	p5	(TAGCA)4	Cmo_Chr01	1437788..1438813	CTGGCATTATGAGCAGCAGA	60.12	AGTGGTGCATCCATGTTCAA	59.97	CTGGCATTATGAGCAGCAGAAGATCACAAGTTCACTAGCATAGCATAGCATAGCAGGAATGTCAAATTTGATTAGCTCCATTGTGGGGTGCTGAGGTTTTGGTACAGTCGGCTTAAAATGATGTTCTCTGCTGTTGCATTGCATCCATCTTGTTTGAACATGGATGCACCACT
CmoSSR00183	p2	(AC)11	Cmo_Chr01	1444097..1445124	GCACTCGAACGAAACCCTAA	60.25	CACATGTCCATCACCTTCCA	60.38	GCACTCGAACGAAACCCTAATTGGGTAATTAACACACACACACACACACACACAAAAAAAAAAAAGTAATAATAACAATTTTAAAATTAAACGTTTAATATTCCAAAAAACACGAAAAATGCTAAATATATATTATTAGGCAAATATAAGTCTTAGTCAACCTGTGTCGAAGAAAATTCTCGAAGACAGAACATTCTGGAAGGTGATGGACATGTG
CmoSSR00184	p4	(TAAA)6	Cmo_Chr01	1445272..1446301	ATAATCTCCAGCGCCAACAG	60.24	TCACCGTAAGTTCCTCGGTC	60.11	ATAATCTCCAGCGCCAACAGCAATAACATCATAGAAATGTCTCAACAACAATACTAAAGTAAACTGCATAAAAAAAATTAAAATTAAAATATAAATATTACTCTAATTAAGTTAAATAAATAAATAAATAAATAAATAGTGGGCGAAATTAGAAAATAAACGGCTACTAATCTAATTTAAAGTAGTGATTAAGGTTAAATTAAGAATTTAATTAATATTAGAAGAAAATTAGAAAAACGGGCAGAGAATATTCGTTGACCGAGGAACTTACGGTGA
CmoSSR00185	p5	(AAACC)4	Cmo_Chr01	1446138..1447163	ACGAATTCCAGAATCCCACA	60.32	TGAAATTTGCCTCCAGGTTC	60.05	ACGAATTCCAGAATCCCACAGAAAACCAAACCAAACCAAACCAAACTCAAAATCAACCAGCTGTGCTTAAGAAAACCCATTACATAGCTCTGGAAAACAAGCCCGAGGTGTGTAAAACTCAAAATCAACGAAAACCCAGTTGAAATTTTGAAGAAAAAAACAGACCCAGAAGCTCAAAAGCTAAGAAGAACCGAACCTGGAGGCAAATTTCA
CmoSSR00186	p4	(AATA)6	Cmo_Chr01	1449018..1450047	CCCACAAATGGGAGATCAAT	59.61	AGACCATTTTGCCCTTCTGA	59.67	CCCACAAATGGGAGATCAATTATACTTTTCGTCTTTATTATTTTTAAGAATAAATAAATAAATAAATAAATAAAATAAGATAATTTCTTACTTTTTTAATGGCCAATTATAAATATTTCATTAATTCAATAATTGAACCCATAAAGTACATATCGAATGTATCTTCTTTGACTTTGGTACATTCATCTTGATCCATAAATTAATTTTAATTCTAGTAAATTTCTATTATAAAAAAGAATTAAAAATTACTTAATAATTATTACTTAGGTCAGAAGGGCAAAATGGTCT
CmoSSR00187	p5	(AAAAT)4	Cmo_Chr01	1449497..1450522	GGATCAGGAGCCTTGGATTT	60.41	AAACGTCGACATCCCAAAAA	60.34	GGATCAGGAGCCTTGGATTTTAAAATCAACGGTCATGAAATAATTTAAAATTTGTGGGCCTAGTAGTGGGGGCCCATGACCACCGGCCTGTTTCGAAGGAAGACGGTGGCCGAGATCCTGTGGGCCCAACCCAAAGTCACTTCTCGTAGTTTCTTTTTAAGAAAATAAAATAAAATAAAATAATGTATTTAATTTTTTGGATATTTATTTTTTGGGATGTCGACGTTT
CmoSSR00188	p3	(TTA)9	Cmo_Chr01	1449999..1451031	GCTTGTGTAATACGGCCCAT	59.85	TTGCAATCAAAGGTGCTTTC	58.89	GCTTGTGTAATACGGCCCATTTGTTTATTATTATTATTATTATTATTATTATTTTAAATTTAAGCCTACAATCACTAGTTTTGTAATTATATATCATAAAGACAACATTATGATGAAAGCACCTTTGATTGCAA
CmoSSR00189	p4	(TTGT)6	Cmo_Chr01	1450797..1451826	AGATCCTCTTTCTCGGCCTC	59.92	CCTCAGACGTCGGGTACTGT	60.17	AGATCCTCTTTCTCGGCCTCGATAATGCCGGCAAAACTACTCTTCTCCATATGTTGAAGGATGAGGTTTGATTTCTTGCCTTTTCTGTTTGCTTGATTTCTGTTTTTGCAATTTGGGGGAATCGGTGTGTTTAGATTTGGATTTGACTGAGGAATCGAAATGGTGGGGGATTTTGGCTTGATTGTTATGGTGTGGATTGGTTATTGTTGTTTGTTTGTTTGTTTGTTTGTTTTGGTTTCTTTGTTCTATAGAGGCTTGTTCAGCACCAGCCAACACAGTACCCGACGTCTGAGG
CmoSSR00190	p5	(AAAAT)4	Cmo_Chr01	1455094..1456119	TTGAGGAGGTCCATGATTCC	59.86	TGCAAAAGCCAAACAATCAA	60.23	TTGAGGAGGTCCATGATTCCTAACATGGTATTAGAGTCCTGAGAATCCTCTAACGAGCTTCATAAACCTAATATCATACCATTGTGGAGATCAAAATTTTATTATTGGTAAATTTTTTCAACTGGGTGTTAAATTTTTGTTGATTATTCGATGTTTATGTGCTCATGGGTTCGATATCGAAAAAAAGAAAAGTAAATAAAAAGAAAAATAAAATAAAATAAAATAAAAAAAGCTGCAAAGATATTGATTGTTTGGCTTTTGCA
CmoSSR00191	p2	(AT)19	Cmo_Chr01	1455496..1456539	TGGAAGCCCGAGAGAAAATA	59.78	CCAAGACATGTTTGCTTCCA	59.69	TGGAAGCCCGAGAGAAAATACCCAAATACGACAATATCTACTGACTGTAGATCTGGGTCATTACAATATATATATATATATATATATATATATATATATATATTTTTTGTTGTAAATTTTTTTAAAAAAATTACCTTGACGTATTTTTTATTAAGGAATATTGGGTTAGTGGATCCATAGGGTTTGACGTCAGCTTAATGCTTCCTTGGAAGCAAACATGTCTTGG
CmoSSR00192	p3	(TAA)7	Cmo_Chr01	1457271..1458297	ATGATCAATCGGGACCGAAG	62.15	TGTGTCCCAAAAGACACCAA	59.98	ATGATCAATCGGGACCGAAGCAGCCTTATATGACTTCATAACATACGTCCACATTAAAATATTAATACACAATTTTTTAAAAAAATTAATAATAATAATAATAATAACTCATTATTAAATTTTGGTGTCTTTTGGGACACA
CmoSSR00193	p3	(ACG)8	Cmo_Chr01	1464964..1465993	TCCAGCGGAGGAAAGAGTTA	59.95	CAAAGCTTTCCCAATTCCAA	60.05	TCCAGCGGAGGAAAGAGTTAGTTCCAACGACAAAATTATTAGCAAAACGACAGATGTTGGTGGGTCTGCGACGTTGAGTTTCGATAAGGACGACATGTCGTTGGACTTGGATGCCTTTTTGGATTGGGACAATGACAACGACAACGACGACGACGACGACGACGACGGAAATAAAGTCACCGCCGCTACCGGTGGCGCTGAGGTGGAGACCGGCGGTGAGTGTAGTTCGATTAGTTGTTCGTTTCGTCTGGACAGTCCTTGGAATTGGGAAAGCTTTG
CmoSSR00194	p3	(TTA)11	Cmo_Chr01	1468669..1469707	GAGCGGAGAGGGGTAAAATC	60.04	AGCAATTTCCCAAAACGATG	59.94	GAGCGGAGAGGGGTAAAATCGGAAAAAGAGAGAGAATATTGAAATGGTGGTGTGGTGTGGAGTCGCGAGTAGTGATACTGGGAGATGAGCTGGAAGTCTTACAACGTTTGGTTTTCCCGATCTCTGTGTCGTACGGAAATCTCTGTTTTATTTTATTATTATTATTATTATTATTATTATTATTATTTAATGGTTTTTTCTGTTCATCGTTTTGGGAAATTGCT
CmoSSR00195	p4	(ATTT)5	Cmo_Chr01	1470748..1471773	AACCCATGTGCTAGATTCAAGA	58.72	GCCTCTTATCCCTTGGAACC	59.9	AACCCATGTGCTAGATTCAAGAATTTTCATAATTTATTTATTTATTTATTTCATTTGGTTTTGAGGGTTTTGTTAATTAAAATTAAAATTATTTATTGGTTAATAAAATAAAATAAAATGATTTTTTTTTTAATTTTTATTAATAATTCAACACCAAATATATTGAGCTTCGGTTCTCACCCACTGGTTCATCTTCCCCAAATTCACAATTCTAGAGAGAGAAAACGAAAGAGAGAGAGAATGGATGAAAATGGGGTTTCTGAGAAATGGTTCCAAGGGATAAGAGGC
CmoSSR00196	p5	(AAATT)5	Cmo_Chr01	1472409..1473439	TAAGTCGACGTGGGCTTTTG	61.18	GCCTAATTCAACTGTTAACCCTG	59.11	TAAGTCGACGTGGGCTTTTGGATCATGGTCCACTTGAATTGGACCTTAAATCTAACCTTTTGATTGTTTTTTAGTTTGACCCATTGAATTTCCAACTTAAAATTAAATTAAATTAAATTAAATTTTCTCAGTCAAATTTTATTCATATTTAAATCATTTTTTAGGCTTCTTATTATTAACACGTGAGAAAAGAAAAAAGAAATGTTTCTCAATGGTAAAAATGGTTGAAGTAAATAGTTAAAATTCACTATGGTAAAATAAATAAACCAGGGTTAACAGTTGAATTAGGC
CmoSSR00197	p3	(AGG)11	Cmo_Chr01	1473691..1474729	TGTCGCTTTGATACGCACTC	60.02	AGCAAGCACAATCATCACCA	60.27	TGTCGCTTTGATACGCACTCGCAGGGAGGAGAAAGATTGATTCGATCTGGTTCAGAGGTTATATTTGTTGTTGATTTTACATGTGTTGTTTTAAAGAGAGCTCTAGAGGACGTTAAAGGAACCCTAACGGTCATTCGAACGGGTTTTTTATTGTCGATTTTGGTAGATCGATTTGGTTTGAAGTGGAAGGAGGAGGAGGAGGAGGAGGAGGAGGAGGAGGGGATTTAAAGGTTGAATATGGTTTGGTTGGTGAAATTATCGAGGGTTTTCTCCGCAGCAATGGTGATGATTGTGCTTGCT
CmoSSR00198	p2	(AT)11	Cmo_Chr01	1479016..1480043	CTCTTCACGTGCAAATCCAA	59.84	GTTCGAATCTCTCAGGCGAC	59.96	CTCTTCACGTGCAAATCCAAACTTGTTAAAATAACCTTTTTTTTTTATTAAAGAATATATATATATATATATATATTATTATTATTATTTTGTAGAAGAAGTATTTGTTTATTAAAAACAGGTAAAGAATAGAGAACAAGAAATAAGAAAGAAGAAAAAATAAAAACAAATCGTCGCCTGAGAGATTCGAAC
CmoSSR00199	p2	(AT)16	Cmo_Chr01	1479820..1480857	AAATCCAAACTGCCAAACCA	60.34	TCGGAGTAGAAAATGGCACC	60.07	AAATCCAAACTGCCAAACCATATAAAAATTGACATTAATTCAATTAATATATATATATATATATATATATATATATATACATATATATAATAATTAAGAACTAAAAGCCAATATTATTTAATTTAGTGAGATGAGGTGCCATTTTCTACTCCGA
CmoSSR00200	p5	(ATTTT)4	Cmo_Chr01	1479951..1480976	GGTGCCATTTTCTACTCCGA	60.07	CCTCACCAATGTGCCTTTTT	59.97	GGTGCCATTTTCTACTCCGAAATAAATAAATACTTCAAAATTCATTTTATTTTATTTTATTTTTTATATTTTTAAATTAAATTTTATCAAATATAAAAAAAAAATGTATTAATTGGTAAATCCCAAATATAATAATTAATGCCCACAAAATGACAACTCATTTGACAAATTAAAAGAGAATAAAATTTTGTACTTTTTCATCCTTTGATGTTGGAAGAATCAACAAGATTTTGTATTTTTATTTTTTATTTATTTTTATTTTTTTTTAAAAAGGCACATTGGTGAGG
CmoSSR00201	p8	(TTTTTTAT)3	Cmo_Chr01	1480953..1481982	CCATGTGAAAATGAAATTGGG	60.04	CTCTCACATCATCAATTCGCA	59.81	CCATGTGAAAATGAAATTGGGAATTTTTATTTTAAGCGTAAAGTAAGTTGTAAAATGGGAATCCTATAACTATAATCATATTTTTTATTTTTTTATTTTTTTATTTTTTATTTTTATTTTGTTTTTAAGAGTTCCCTTCACTATTTGACCTTCAAAATTTATAAACTTATTTAAAATTTTAAATTTGGTTAAATATAAAATTTAATTTTATGTTTAATAATTCAAAATAATTTTAAATTCTAGTGCGAATTGATGATGTGAGAG
CmoSSR00202	p2	(AT)9	Cmo_Chr01	1483696..1484719	AGGCAAGGAATATGTCGAAAA	58.71	GGGGATTTGATGTCGAAGAA	59.87	AGGCAAGGAATATGTCGAAAAATTATTACTACTATCATCATTCACAATGACTTAAATCAATTTTGTTTAAAGGAGATTTTTTTTTTTTAATTTCAACTAATTACATATATATATATATATATACACGTCAATATTTAATCCAAAAAATATTAAATTCTCAAATTTCTTCGACATCAAATCCCC
CmoSSR00203	p2	(AG)9	Cmo_Chr01	1484519..1485542	TCGGAAAGCAGAAAAGCAGT	60.13	GTGGCGGTAATGGAAAATTG	60.19	TCGGAAAGCAGAAAAGCAGTACAGAGTATCAAAGGCATAGGAATTACAGATAGAGAGAGAGAGAGAGAGGAAAAGCAAAAGCAAAAAAGCGTGAGGCAATGAAGAACTGATAGCAAAGAAATGCCAACAAACTCCATTACCCATCAACCCAATTTTCCATTACCGCCAC
CmoSSR00204	p4	(TTGT)5	Cmo_Chr01	1485840..1486865	GCCATTCACGAATTCCTTGT	59.94	TCAAAAGTGCACGAATGAGC	60	GCCATTCACGAATTCCTTGTCAAGAACTTCCTCTTTGAATGACAAATCTTTCAATCCTTCCAATGTGGTTTGTTTCAATCTTACGTTGTTTGTTTGTTTGTTTGTCTCATGTTTATTTTGTTTAAGCTTCTTTTAAACTCTAGTGTTTCTTTCTTGTCAATTGTTCATTGTAGCAGTCTAGTTCTCGCTCCTCGCTCATTCGTGCACTTTTGA
CmoSSR00205	p2	(TG)9	Cmo_Chr01	1496541..1497564	ATGATCGCCAATGCTCTTTT	59.67	GCAGACGCATCCCCTAATAA	60.06	ATGATCGCCAATGCTCTTTTGCATGTAAGTTCTATTATAATCCCTTCACCGTTATTATTTCTAGAGATTATGTTCAATAATGATATCAGGAACTAAATTATTTCCTGGTGGTATGAGATTCATTTATGTGTGTGTGTGTGTGTGTAGATAGAGAGAGAGAGAGAGATAAAAATTCTGGACTCATCTAACCTTCATCTCCCATGCTGCCTCTTCATTTGCAGTCAGTGAGATTATTAGGGGATGCGTCTGC
CmoSSR00206	p5	(AAAAG)4	Cmo_Chr01	1498226..1499251	TAATGCCCGGTTCTGCTACT	59.73	ATGCCATCATTGGAAGCATT	60.3	TAATGCCCGGTTCTGCTACTGGATCTGTTTATGTTATCAATTGTAGTTTAAAGTATTATTAAATATTAGTAGAATTTTAACTGTGTACATCTAAAATGTAATTAGGACTAACTTAGTGGTAACAATGTATGTACACCAAGTTTCCTATTTTTTGTAAAAGAAAAGAAAAGAAAAGGGTTTCAAGGAGTTTCTCGTAGAATGAAAAATAACAATATTAAATAATTTTCGAAATTATAATTGACGAATCAATTAAGGTGAAGGATTCAATATGCATACCCCAATGCTTCCAATGATGGCAT
CmoSSR00207	p3	(AAT)7	Cmo_Chr01	1501744..1502770	CGACATACGGGGATCCATTA	60.54	GGGATTCAGGGTGGTGTGTA	60.63	CGACATACGGGGATCCATTAGAAATAAATAAATAATAATAATAATAATAATAAAACTCACTTGAAAATGTACATGAATGCTTAGTAAAAGAGCTGAACAAGTGTGGGTAAAATTGTAACTCTATCCTCCTCAATAGTATCTTTACAGAGTATAATGCCTTTACCTATTCACTCCTGTTTTGTATACACACCACCCTGAATCCC
CmoSSR00208	p2	(AT)9	Cmo_Chr01	1510693..1511716	ATCCGATTCCTTGCCTTTTT	59.91	TGGATCGTCGGCTCTTAGAC	60.36	ATCCGATTCCTTGCCTTTTTCTTTTTCCTTTTTTCCTTTTTTTTTCCCATATATTTATTTTAAATATATATATATATATATAGTTCTATAGTCCTTGTTAATCAATGAGTGTTTAAATAAATTATAATTAGTAATTTTTTTAACTTTAAAAATTTTAAAAATATTAACCGTCTGAATGCTTTTAACTTCCACTTTTTATGTCGTATGATTTGTAAGTAGTATTTTAAGTCTAAGAGCCGACGATCCA
CmoSSR00209	p2	(TA)14	Cmo_Chr01	1511429..1512462	ATCCATTCCCAAGTTGTTGC	59.8	ACACGTCCATTCATGAGGTC	58.35	ATCCATTCCCAAGTTGTTGCTAATTAATTTATTTAACAAAACTAAATATTTCAAAATAGTAAAAGTACATAATATTAGAATTATCTGATAGATTATTATAAAATTATTATTTATTTAATATGAAAGGCACTTTCTTTGAGATCGCGATATTAAAATGTTTTGGAATTAAAATAACACATTAATTAACGGATTAGGTGAACACACTTGGACTTGGATTTCTATTAAATTACAATAAAGCTATTATATATATATATATATATATATATATACAATGACCTCATGAATGGACGTGT
CmoSSR00210	p2	(AT)11	Cmo_Chr01	1511569..1512596	TGACCTCATGAATGGACGTG	60.53	TCGCGACTATATCACCTTCTACTG	59.83	TGACCTCATGAATGGACGTGTAATTCAAATAGAAGTTAAACTCTCCATCTATTTTAACTAAATATTTAAAGAGGAGGTTAGTAATATTTATGTAATTATTTATGCATACATATATATATATATATATATATAATGATTCATATAATATTTTAAATGTTTTTTTCTAAAATAATATTCCAATATAATTTAGTGGATCATTTTTTATTTGCAGTAGAAGGTGATATAGTCGCGA
CmoSSR00211	p2	(TG)12	Cmo_Chr01	1512748..1513777	CCAGGTGTGCTGGTTTCTTT	60.15	GCAGTTTCCCGTCATCATCT	60.08	CCAGGTGTGCTGGTTTCTTTTTCTTTTTTTTTAATCTGTTTGGATTTTTAGGCTTATGTTTGGAATCGTTTGAGGAAGAACACTCTGTGTTCATTGTGTGTGTGTGTGTGTGTGTGTGTCCTGTTTATCATTTTCCACCATTTTTGAGTTGATGCTAATTTACTGATGCATTTGAGGTGGGCTTTGAAGGTATATTGATCAGGGAAAAGGGATTTTACAGCCCCATCATTTGATTGATGAACTCGAGAATATCATTGGAGATGATGACGGGAAACTGC
CmoSSR00212	p7	(CATCGAG)3	Cmo_Chr01	1518792..1519818	ATGAAAAGACGGCCAACAAG	60.11	TTGAAGCTATTCCAATGATGTG	57.78	ATGAAAAGACGGCCAACAAGAAAATAAAGATAATAATATAAAAATGTCCAAAAAAAGAAACAATAATTGAAATTATTTAATTTCAACGCCTACATTATTAATCTCTACATCGAGCATCGAGCATCGAGAATGTGAATCTATATCTTTAAACCAATATAATATGATATACACGTTAAATCTATATTGTTACACATCATTGGAATAGCTTCAA
CmoSSR00213	p4	(TTAT)5	Cmo_Chr01	1523557..1524582	TGAATGGTTATGAGCTGCGA	60.37	TCTGAAGGCGACAAGGAAGT	59.99	TGAATGGTTATGAGCTGCGATTAGTACTCGAGACACTAAAGAACATTATTTATTTATTTATTTATTTTTATGAAATAATTTTAAAAAATTATATATAGAAACTTTTCAAATAATAGTCAATAGCCCAGCAGCGTAACCAAGATTGGCTCTCCTCGACATCACTCCAAGCTTTTCAACTCATTTTTACTTCCTTGTCGCCTTCAGA
CmoSSR00214	p4	(ACAT)5	Cmo_Chr01	1528783..1529808	AGAAGATCCTTGGCCTTGGT	60.07	TTGATGAGGCTTATGGAGGG	60.03	AGAAGATCCTTGGCCTTGGTGATGTCTGGCTTCCTCTTGTGGGGGTCGTCCTCTGTGTTCGGCCTGTACTCTATCTTCGCATCCGGGTCGATCGTTTCCTGCACGACCTGCTCACACAACATACATACATACATACATATGACCGAGGTTATTATCATCGTTACGTTTTTACAACCTTCTCACTACATTACTTCGCCAAGAAATGTACCTTGGCAAGTTCAAGCATGGTGAATTCACCGGGGTTTCCAAGATTAAAGGGTCCAATATGCTCTCCCTCCATAAGCCTCATCAA
CmoSSR00215	p4	(TAAT)6	Cmo_Chr01	1529809..1530838	CATCAATGCACATTCTTGGG	59.92	ATGTGTGACAGGTGTCCGAA	60	CATCAATGCACATTCTTGGGCCATAAGTGTTGAAAATTCTAGCAATCCTAACCTGCAAAAGGAAACATAATTAATTAATTAATTAATTAATTAAACTACTTAATATTATAATTAATGGCGACCAACCTCAACTTGAGCTCCTCGGTGATAGTCCATGGTCAACGTCTCGGCCGTCCGTTTTCCCTCGTCGTAACAGCTTCGGACACCTGTCACACAT
CmoSSR00216	p2	(TA)9	Cmo_Chr01	1554132..1555155	ACCCCTGACGTTGACACTTC	60.01	ATGGATTTTGGTTCGGGTTT	60.41	ACCCCTGACGTTGACACTTCCTCTACCTCAGTATCGTCGTCGACACCACACTACCTCGATGCTAAAGATAACGCCACCACGGTTCATCAACGGATTTGGGGGCAAAAATGGAATTATATATATATATATATATTATTATTATATTTAATAATAATAATAATCAAGTATATAGTTGATTGGGATGTTATGCAATTTAGTAAATTTAAAATAAAATTACCTTTTTGCCCCAAGTTCCCGCAAAACCCGAACCAAAATCCAT
CmoSSR00217	p2	(TC)16	Cmo_Chr01	1560657..1561694	TGTGGATGCAAATGGTGAGT	59.97	ATCTGGTGGAAACACAAGCC	59.97	TGTGGATGCAAATGGTGAGTATAGGCATCGACAGGACAGTCTTCCACTCCCACCACCAATCCCTTCACCATCCCAATCTCTCTCTCTCTCTCTCTCTCTCTCTCTCTCATCCCTATAAGCCATTCAAAACCCTCGATTCCCCTTTCCCATTCCCCACTTTCAGCAATGGCGGAATCCCTCTTCTCCACCCTCCCCGACGACATTCTTCTCAACATCTTCTTCAAGCTCGAAGACAATCCCTGTTACTGGGCTCGTCTGGCTTGTGTTTCCACCAGAT
CmoSSR00218	c	(AG)10aa(AG)15	Cmo_Chr01	1572056..1573113	TGTTGAAGCGCTGAGAGAGA	60.01	CTTGAGCGAACTCCTTCGAC	60.13	TGTTGAAGCGCTGAGAGAGAGAGAAAGAGAGAGAGAGAGAGAGAGAAAGAGAGAGAGAGAGAGAGAGAGAGAGAGAGTTCTTCCCGTCATAATAAAACCTTATCTTTCTCCATTGTTCTATCTCTCTTTCGGAGCCTTCTTCAGCTCTCAGCCGCTCTCCACAATTTCCTGTCAACGCGCAGGACCTTGTGGATAAAATTTCCGTTTTCATTCCTTCATTATCCAGTTTTGATTTTCCGATACACTCAGTTCTTGTAGATGGAGTCGAAGGAGTTCGCTCAAG
CmoSSR00219	p3	(CTT)7	Cmo_Chr01	1600983..1602009	TAAACGCTGCCTTCCATTCT	59.85	AAGCAAACGCAAAACAAAGC	60.42	TAAACGCTGCCTTCCATTCTTCCCCTTCTTCTTCTTCTTCTTCTTCCACTCTGCACAAATAACGAAGTGAACAAACTTCCCAAGGCGGCTCCACAGATTCATTCATTCATTGATTCATTCATTCCTCACAAATTTAGGCACAGAAAAACAAACCCATTTCTTTAATTCTCTTAAATTTCTTCTTTGATCAAACAAAAACAGAACCCCATTTCTTCTTATCATTCTGTTGCTTTGTTTTGCGTTTGCTT
CmoSSR00220	p2	(AT)13	Cmo_Chr01	1613292..1614323	TAAGCAAAAGAAGAGGGCGA	60.09	CGGTTAGGCAACGAAACATT	60	TAAGCAAAAGAAGAGGGCGAGAGATATTTGATGAACATATATTTTTGGCTTCCATATTTATAGCGGAGGAGAAGAGTAGCTTTACTTTTAAAAATATATATATATATATATATATATATTTACAGTAAGGCCCGCACACGCCCGTGACTCGGATAAGAGTTTTAAAATGCGTCGAGAGATTTCTACACTCTTATAAGAATGTTTCGTTGCCTAACCG
CmoSSR00221	p2	(AT)14	Cmo_Chr01	1664086..1665119	AGATTATTCTCCACCCCGCT	59.92	AATGCCATAACATAGCCTTTTC	57.38	AGATTATTCTCCACCCCGCTTCGTCCTCACTTTTATATAAATAAACATACATAAACATATATATATATATATATATATATATATTTTCTGTCTTCCATTTATATTTTTATGATTTTCTTTAAATGTACCATTATTCTATTTTAGACATAAATATTATTACTTATATATTTGAAATTTAATTAAAATTATGGAATTTTTTTTATATAGAAAAGGCTATGTTATGGCATT
CmoSSR00222	p4	(TCAT)5	Cmo_Chr01	1667994..1669019	AAAAGGGCTCACACTGATTGA	59.73	TTGTAGGAGCAACCCCAAAG	60.1	AAAAGGGCTCACACTGATTGATAGCCATCCATTAAAGTACAATACTCATTCATTCATTCATTCATTGAATCACTGACAATATGAGAGAGAAAAAAGGCAAGATTTGTGATTACAATGAAGGGTTTTAAAGATGATTACCTGTAAATGGCTCTTGACATGAGCCAATGTTAGATCCTTAACATCCATCAGCTCAAGAACTGACTTTGGGGTTGCTCCTACAA
CmoSSR00223	p7	(GAAGAAG)4	Cmo_Chr01	1669403..1670436	TTTGAGAGATTTGGGGTTTGA	59.53	ACAGATGCCCGAAACACTTC	60.12	TTTGAGAGATTTGGGGTTTGAGTATTATGGTGTTTCTCTCAAGAGCTTATATCAGAAAATGACAATGAAGAAGAAGGAAGAAGGAAGAAGGAAGAAGAAAGAAGGAATAGCACAACCTTCTCTCTCCTCTTACTCTATTTCTATTCTCTCTCTAGTCAAAATAGATAAATAAAAAATTTTAAAAAGTTCAAAATTTTATATTTTTAGTCAAAGATTCCAATGGAAGTGTTTCGGGCATCTGT
CmoSSR00224	p2	(AT)10	Cmo_Chr01	1671123..1672148	TCAGCAATCCTTATCTGGCA	59.38	GCTACTGAACCGCTCGAAAC	60.02	TCAGCAATCCTTATCTGGCATGCAAATATATATATATATATATATGAATATAAATAAATCATATTATATAAAATATCATATTGAATTTTATTTTATTATATGGTCTTTATGGTTTGACCCTTTCAAAACCCTAGACTTAAATACTGTCATGTGTATATGTACACATGATCATCAAAGCTTCTTATTGGGGATTCACCCCCTCTTTAAATGCATGCTCTCTTTCCTCAGCTTATAAAATTCTCTCTTGTTTCGAGCGGTTCAGTAGC
CmoSSR00225	p2	(TA)9	Cmo_Chr01	1710826..1711849	CCGGCTTCTTTTAGCTTCCT	59.98	AAAATCAGCTCTGCTTTGCTC	58.87	CCGGCTTCTTTTAGCTTCCTCTGAACTAGATAAAACTGTCCAAGGTTGTGAAGTGCAGAACCAACTCTGAACAATAAGAGTTCGAATCACATCAAAGATACTTTATATATATATATATATATGTGTGTGTGTGTGACTAGATCCGTTAAGAAAAATGATAGAGCAAAGCAGAGCTGATTTT
CmoSSR00226	p8	(AAAAAAAG)3	Cmo_Chr01	1711967..1712996	CATGCTGGGCCTTACACTCT	60.28	TTGGAGGAATCCTATGGCTC	59.08	CATGCTGGGCCTTACACTCTACCATATCAAGGCCCTCATCATGATATTCCAGCTGGAAGTTCCTTAACATACCATAGGAAATTAGAGAAGAACATGTTGTTTTCATGCAATAAAAAAAGAAAAAAAGAAAAAAAGAAAAAAAAAAAAGATGCTTCTAGTTCATGTACAAGCGAAGTAAAGCTGATAAAAAGGATGCTTCTAGTTCATGTAAGGAAAAATGTGAGGTTTGCTACATAGAAAAAGATAGCAAGATTCAAGAACCTTATATCTTCAGAGCCATAGGATTCCTCCAA
CmoSSR00227	p2	(TA)19	Cmo_Chr01	1721625..1722668	CCATTCACCGAGACTTTGGT	59.97	GATCATCGGGAGTGGAAAGA	60.01	CCATTCACCGAGACTTTGGTCTACATGTTATCCGATCACCAGCCTACTTGACCCTCCCACAATAGGTATGCATAAAAAAAAGAAAAAAATTGTGAGTTTTGAGGAAAAAAAAAAAAACAATTCATTTAAAAAATATTCTTAAAACTCAAAAAAAAAAAAAAAAAATATATATATATATATATATATATATATATATATATATAGATATAGATATATATATTTATTTATTTATTTATTTTGAGGGCTTTCCTTTTACCCGTTCTTTCCACTCCCGATGATC
CmoSSR00228	p4	(TATT)5	Cmo_Chr01	1721677..1722702	CCATTCACCGAGACTTTGGT	59.97	GATCATCGGGAGTGGAAAGA	60.01	CCATTCACCGAGACTTTGGTCTACATGTTATCCGATCACCAGCCTACTTGACCCTCCCACAATAGGTATGCATAAAAAAAAGAAAAAAATTGTGAGTTTTGAGGAAAAAAAAAAAAACAATTCATTTAAAAAATATTCTTAAAACTCAAAAAAAAAAAAAAAAAATATATATATATATATATATATATATATATATATATATAGATATAGATATATATATTTATTTATTTATTTATTTTGAGGGCTTTCCTTTTACCCGTTCTTTCCACTCCCGATGATC
CmoSSR00229	p2	(TA)22	Cmo_Chr01	1744397..1745446	CATTTTGGGCCTGCACTATT	59.96	ACCAACCCGACCATCAAAT	60.04	CATTTTGGGCCTGCACTATTTCGCTGATTGGGCTTGACCCAAGTGTTTTGGGCCGGCAATATTTCAATTGAAGATTTTCTCTAGGCCTTTCGTACCAATACGAGCATAGTTCGTTGGATAAATAAGTATTTACGGTTTAAAAAGTCTATAATTTAATTCTTTCGAGAAATTATTATATATATATATATATATATATATATATATATATATATATATAAAATGATTTAGTTTGCTAATAAGTTAAGGAACAACGATAAAAGAAATTTGATGGTCGGGTTGGT
CmoSSR00230	p3	(TTA)7	Cmo_Chr01	1753824..1754850	CTGATCTGCTCGAACCACAG	59.57	AAGCGTTAGGCATTGTGTGTC	60.19	CTGATCTGCTCGAACCACAGATCCAAATTATTTGTTTTTGTCTTGTTTTGTTTGTTATTATTATTATTATTATTATTTTAATTTTCTCTTCTTGCTGAAAGTACAGGCAAATTCACATGTACATTCGTGAGCTACTTTGAACACAATAGTGAATTTGACTTCTTTTTACTTTTTACTTTTTACAGATAAACCAGTAAAAATATTATTTCCTTGCTTGAAAATGGTATTCTAATATTCTTACTATTTTTACTTTTAGGACACACAATGCCTAACGCTT
CmoSSR00231	p7	(CTTTTTA)3	Cmo_Chr01	1753931..1754957	CTGATCTGCTCGAACCACAG	59.57	AAGCGTTAGGCATTGTGTGTC	60.19	CTGATCTGCTCGAACCACAGATCCAAATTATTTGTTTTTGTCTTGTTTTGTTTGTTATTATTATTATTATTATTATTTTAATTTTCTCTTCTTGCTGAAAGTACAGGCAAATTCACATGTACATTCGTGAGCTACTTTGAACACAATAGTGAATTTGACTTCTTTTTACTTTTTACTTTTTACAGATAAACCAGTAAAAATATTATTTCCTTGCTTGAAAATGGTATTCTAATATTCTTACTATTTTTACTTTTAGGACACACAATGCCTAACGCTT
CmoSSR00232	p6	(TTTTTA)4	Cmo_Chr01	1780988..1782017	ATTTGTTGAATGCCAAAGCA	59.16	GACACCCACTTAATTCCTCCA	58.9	ATTTGTTGAATGCCAAAGCATAATCAATTCTATCAACCGATCCATATCGAAATTTTAAGAATCCATTAGAAATTAAGTTCAAATTTTAAATACTAAATAAAAACTAAATTTAAATCCCAAAAATAAAAAGATTAGTCCTAAAAAAATTAAGAAGTTAACTTCTAAATTTTTTTTTATTTTTATTTTTATTTTTATTTTTGTTGGAGGAATTAAGTGGGTGTC
CmoSSR00233	p3	(AAT)8	Cmo_Chr01	1781534..1782563	TCAATCTATGCCCGTTTTCC	59.9	CCTTTCCAAAGCAAAACCAA	60.08	TCAATCTATGCCCGTTTTCCCTGTTTCACAATTATTTAAAGCAAAAATAATAATAATAATAATAATAATCTCATTAAACAAACATATAATAATTTAAAAACAAATTAGGGAAAATATTACTTTTTTTTTTTTTTTACTTATAATTAAATTAAATTAAGCTTATTTAAAAGGATGGCACCTCTCTTATACATGAGCCAAGCCTCTCAAGTCTCTTTGGTTTTGCTTTGGAAAGG
CmoSSR00234	p4	(AAAT)5	Cmo_Chr01	1785513..1786538	ACGTAAGCGTTAGGAACGGA	59.77	GATTGACGAGCTCTGGAAGG	59.95	ACGTAAGCGTTAGGAACGGAATTGACACGTCAGCTTGGGACGAGACGAGCCGTAGATTACATTCAAAATAAATAAATAAATAAATAAAATAAAAAAAAGCGCCCATATGTTAATACTATAAAAGCGTTTAAACCGAGAAATCAGTCGGTTTCAAGACAAATTGCGGTCCCATTGGTATTCATGACCTAAACGTGGAGCTTTAGAAAATCCTTCCTTGCTGCATGCGTTCGACCTTCCAGAGCTCGTCAATC
CmoSSR00235	p2	(TA)10	Cmo_Chr01	1794451..1795476	TAACACGAGGCACTTGTTGG	59.76	GCTTGTCCTTGTCCATTCGT	60.12	TAACACGAGGCACTTGTTGGCTCAAAAGGTGTAAGACACAACCCAGATACCACGACGAAGTCCATGTACTAGATAATTAGACACTCTAGCATGAGATACTTGTTGACACAAAAGGTGTATGTTATGTATATATATATATATATATAATCGTAGCTGGTACTAAATGAATGAGTCTGACAATTTGTTTATGTAGAAATATTTATTAAGAACAACGAATGGACAAGGACAAGC
CmoSSR00236	p3	(CTT)11	Cmo_Chr01	1800730..1801768	TTGTCCCTTGTGAGCAAAAA	59.29	GCTTCGCTCAGTGAACCCTA	60.54	TTGTCCCTTGTGAGCAAAAAAATGCATTAGAAAATTATAATCCTCAGAGCTTCTTCTTCTTCTTCTTCTTCTTCTTCTTCTTCTCCTTTTCTCTCTCTTTTGTTTTTGATAAAAATATTTTCCTTGTAGCTTACTACTTCTAGGATACCAAGAACTCATACATTTACCAAAACATATATATGGATAAGGAGAAAAGATAATAAAGCATAAGGAATTTGAATCTAACTGACCATATGTTAACTTAGGGTTCACTGAGCGAAGC
CmoSSR00237	p2	(TA)9	Cmo_Chr01	1805801..1806824	CGTGCAAGGGTTTCAACTTT	60.15	AATTGGGTATGGATGGAGAGA	58.32	CGTGCAAGGGTTTCAACTTTAAAATAATATTAAATATTACAAATTTTTTTATTCAAAACCTAGTGCTAATTTATTCACGTGTGTATATATATATATATATAACTAATGTATAATTGAAAATTGTCTCCAACATTTAATATAAAATATTTTAAACATAAACTTGTACCCCTCAAATATATCTCTCCATCCATACCCAATT
CmoSSR00238	p2	(AT)9	Cmo_Chr01	1808711..1809734	TCGGGAAATGAATAGGGAAA	59.34	CATTGTGCAGAACCATCCTC	59.09	TCGGGAAATGAATAGGGAAAATGTTGATGAGGCAATAATATATATATTTTTTGAGATAATATAGTATGGAGAGCTTAAGTTCCACTTGATATATATATATATATATGTAGCATTTGTAAATTTATTTTTAAAAAATAAAATAATTAATCCTTTTGAAATATAAACTAATAATTGTTTCTTAAACCCTAAATATTTGCAGAAAAGAGTGAGCTTTGTGAAACAATGAAGAGGATGGTTCTGCACAATG
CmoSSR00239	p2	(TA)10	Cmo_Chr01	1814584..1815609	ATTTACACGACAGGCGTTCC	60	CTGACCATTTTGCCCCTTTA	59.93	ATTTACACGACAGGCGTTCCCAGTGACCTATACCAGAATGATGAAAAGAACCGTTGGTATTACTTCTCCGGCGCAGTTGGGAAGCCGCCAGCCATGGCGGCGCTGGTGGTGGTGGGCCTTGCCTGTGGAGCTTTGGATCTCATAGTGTTTGGTAAGTGGTAAAGGATGAATAGAAATATATAGTAAATTAATGTATTAAGTTTGGTATATATATATATATATATATTTGTTTTTGTGATGTTATTTTAATTAATTTTTTAAAACATTTTATAAAGGGGCAAAATGGTCAG
CmoSSR00240	p4	(TTAT)5	Cmo_Chr01	1827393..1828418	GCGAGGAATTGAGAAACGAG	59.96	GTCAAGCATTGCCACATCAG	60.27	GCGAGGAATTGAGAAACGAGGGTGAAAATGGGAAGATAGAGAATTTAGGGTTTGATCTGAAATGGGTTTTAGAGAGGATTGAAGATGAGTCAAAATTCAGTCCATTATTTCGCCTCAACGATTAAGGATTGTCTATTGGGAAGAACCAAGAACTCTGTGCTGGTTGGTCATTGCTTCAAGATCTTCAATTATTTATTTATTTATTTATTTTTATTTTATTTTTTGGTATACAGAAATGAATAAAAGAAAACTAAAATTTCGGAAAAAGACAAATCGGAGCTGATGTGGCAATGCTTGAC
CmoSSR00241	p4	(GAAC)5	Cmo_Chr01	1839276..1840301	AAAGTACTCTCCCGACAGCG	59.5	CCTCCTTTGCTTATCCCTCC	60.03	AAAGTACTCTCCCGACAGCGTTATACAGTTCAATTACCGCTTCGGTAAGAAACTATCTACGTTACTATTTTAGTCTCGAAACTTTTAAAAATATAACGGGTTCGCTTCTTTGAATATGAACGAACGAACGAACGAACAGGCAGTCAATTATTATCGGCAAATATAAAGATCAGAGCTGTGGATGATGTGAAGAAATCGTTGGTTTATAAAGTTATTGAAGGAGATATTCTAAAGCATTACAAAGTGTTTGAATTAAGAATTGAAGCTGTTAATGGAGGGATAAGCAAAGGAGG
CmoSSR00242	p2	(AT)15	Cmo_Chr01	1848530..1849565	GCATGAGTGAGGCATAGGGT	60.1	TCCTACCATTGAAACCCCAA	60.16	GCATGAGTGAGGCATAGGGTGTAGGGCATGTACCTTGCCTTTTAAGCTCCCTTTGCGTGCTTGCTTCTTTGTCGAGGCCCAATCCCACCTTTCTAGTTGTCACTAATGTTTCTTTGTTTTCAATAATTAAAATTATTATTTGAATCCTATTACTCTATAGGTTGTCAAAAAAAAAATATATATATATATATATATATATATATATGAACAATGAGTTAAAATAAGCAAGAGACTTCTTTCGGAGTTATTCACTACTTTGAAAATTGGGGTTTCAATGGTAGGA
CmoSSR00243	p2	(AT)10	Cmo_Chr01	1850370..1851395	TGACCCTCTTTTTCTGTGGG	60.08	CAGGTTCCAATAATACCACGG	59.21	TGACCCTCTTTTTCTGTGGGCTATCAATTTCTTAATTTGGCTCATTTAAATTTGTATTTTATATTTTTTCGACCGTCAAATGAAGATTTAAATATGTGATTTTTATAACAACAGTCTAATATTTTTATGAGTCGGTCGAATTAGAGTTAGATTTCATGCTTGCCTGATATTGGAAAAAAAAAATATATATATATATATATATAATTAATTAATTAGTTTAAGTTTTTAGGTTTAGTAGCGAGAGTTACCGTGGTATTATTGGAACCTG
CmoSSR00244	p2	(AT)20	Cmo_Chr01	1850684..1851729	CAACTTGAAATGTTGACTTGTCG	59.7	CCTTTTTGACCACAAAAGATGA	59.11	CAACTTGAAATGTTGACTTGTCGTCAATCTCTCATTTCAATAAAACGTGTCGTAATGAATATAAAATATTATAAAATCTTTTTATGGTATGCAATAACCTACTATATATACATACATATATATATATATATATATATATATATATATATATATATTTTGTTTTATAAGGTTGGAGTAGGAATTCATCTTTTGTGGTCAAAAAGG
CmoSSR00245	p7	(AAAATGA)3	Cmo_Chr01	1859677..1860703	AAAGGATGTGGATTTGGTGC	59.8	CATTAGCCTTCATTAGCCTGG	58.86	AAAGGATGTGGATTTGGTGCAATCAAAAGAAGTTCAACTATTCTGGTATGGAATGGCTGAGGTAAGAACAGAAAATTCTCATTTGTTTAAACTTTCTTCCTATCTGAAAGGAAACTTGCTTTCTATATTCTAACATTGATTGTTTCCTTCTAATAAAATGCATCAATTTCATTAGGAAAATGAAATATTAAAAATAAAATGAAAAATGAAAAATGAAAAAGGCCAGGCTAATGAAGGCTAATG
CmoSSR00246	p2	(AC)11	Cmo_Chr01	1871923..1872950	GTCTCTTCCGTCTGAGGTGG	59.83	TACTGCCAATTGGGAAAAGC	60.07	GTCTCTTCCGTCTGAGGTGGAGGGAAAAATCTGAGGTCTTCCTCCCTTCCATGCATAAATAGCATGTAGGAATTACAAAAGATTTATCCTAGAGCTCCTTCTTGGGTTCTCGTTGATTTTTTAGGAGTGTTTATAATACACACACACACACACACACACATTTATTTTCTTATCGATGAGAAACAATTTCATTGAGATATGAAATTTACAAAAATGGTAAGATATCTATAAGGATTACAAACGGCTTTTCCCAATTGGCAGTA
CmoSSR00247	p2	(AT)10	Cmo_Chr01	1880290..1881315	GAAGGCCATCCTGACCTACA	60.07	AATCAAGGCCCCAGAAGAAT	59.9	GAAGGCCATCCTGACCTACAATGCTATGGAGACTACAAAAATACTTTCCACTAAACCATGATAGAAAGAAAAGAAATTGGAAATATCACAAAAAATGATTAGAGATGACCAAAAGATGCTGAATATATATATATATATATATACTTTTTTTTTTTTTTAATTAAACCATAACATTCTCACATTCTTCTGGGGCCTTGATT
CmoSSR00248	p2	(TA)9	Cmo_Chr01	1883231..1884254	TCTGCCTTTCCTTTCTGCTC	59.69	CTTCCTTCGCCTTGCAAATA	60.34	TCTGCCTTTCCTTTCTGCTCGAATTTGTCTTTATGATGTTTATTTTCCATGCAGGTGGTTTCGAAGATTTTTGGATGGTTTGTAAATCTTTGTTAATTTTAATTGATTGGGTTGGCTTCATTTATCAGTTTTGTATGGAAGGCTTGCTTGTGTATGTGTATATATATATATATATACATTATATATATATATATATCATCTTAAAGTACAAACTCTTGCTACTATATATTTGCAAGGCGAAGGAAG
CmoSSR00249	p2	(AT)20	Cmo_Chr01	1899144..1900189	TTGATTAGCGGATGTTGTGC	59.69	CCCTTTTCGCTTTTCTAGCC	60.32	TTGATTAGCGGATGTTGTGCTTAAGTCCATGATTAGCAGATGTTTTCATAAAGTAATGTTTTGTCTCTTTGATTAACGTGGAATCTCACTAATATATATATATATATATATATATATATATATATATATATTAAAATTTTATGGTGCAAATTATTATACCTTATACCAAGTTGAGATGAGAAATTGATATTTCCAGAAAAAACAAAAAAGAAAAGAAGAAAAAGAAAAATAGAGTTAGGCTAGAAAAGCGAAAAGGG
CmoSSR00250	p2	(TA)11	Cmo_Chr01	1899361..1900388	GGCTAGAAAAGCGAAAAGGG	60.32	AAAGGCTCGTTTGAGTTGTTG	59.41	GGCTAGAAAAGCGAAAAGGGACGGGTACAACTAATTACCAAACAAATTAATTTTCTTTTAAATAATTAATTTATATATATATATATATATATAATAAATAAAGTACAACAACTCAAACGAGCCTTT
CmoSSR00251	c	(ATT)9ataaaaa(AT)9	Cmo_Chr01	1903523..1904580	GGGGAGGACACCTGTAACAA	59.82	CTCATCCCCCTTTACAGCAG	59.69	GGGGAGGACACCTGTAACAACCTAAAATAATGATAATATGTATTTATTTGTTGTGTGTTTGATGATGATGATGATAATTATTATTATTATTATTATTATTATTATAAAAAATATATATATATATATATCGAAACGAAGCAGCTGCTGTAAAGGGGGATGAG
CmoSSR00252	p2	(AT)38	Cmo_Chr01	1921896..1922977	TCGTTATAGTCCCGACCCCT	60.7	CCACCTCCCCTCACAAAGTA	59.96	TCGTTATAGTCCCGACCCCTAATATGAATATATCTTTATGTACGTCAAAATTAAGATATATATATATATATATATATATATATATATATATATATATATATATATATATATATATATATATATATATATATTTCTTTGCTTAGTAAATAAATACATTTATTTTAAATATTAAAATTTTGAATTTTTGAAGTTACTTTGTGAGGGGAGGTGG
CmoSSR00253	p3	(TTA)11	Cmo_Chr01	1932718..1933756	CAACCTCCTCCTCCCATTCT	60.45	GGAACTAACACGTGGGATTAAA	58.05	CAACCTCCTCCTCCCATTCTAAATAGGTGGGCTATGACTTAACTTTAACACTGAGCTTTTATTATTATTATTATTATTATTATTATTATTATTTGTCTCATTAATTTTTATAATTATTTAAGATAAATTACTCCATGAATATAATTTTAATTTAATTTCTATAGTTTAGATTCTTTTTAACATAATATTACAAAAATTTAACAGTGATTTAATTTGTTCCATATAGTTTGTTTAATCCCACGTGTTAGTTCC
CmoSSR00254	p4	(ATTA)5	Cmo_Chr01	1955275..1956300	AACAAGTTGCTGATGGGTCG	61.1	GGGGGTAAAAATGACCCAAA	60.75	AACAAGTTGCTGATGGGTCGTCGGTGGCTTAGATTAATTAATTAATTAATTACTCAATTATTTATTTCTCACCTAATAAAAATAAAATATGTAAATTTAATTTATTTTTTTAATAAAATAAATCACTAAATACAACTCATAATTATCACCGTTGACTTTGTCAAACTACATTTTGGGTCATTTTTACCCCC
CmoSSR00255	p2	(CT)9	Cmo_Chr01	1958589..1959612	CTTTATGAAACGTGGCCCAT	59.82	GTTTGAAACGGAGGGAAACA	59.95	CTTTATGAAACGTGGCCCATCGCGAGATTCAAATTTAAAATTCTAATAAAACTTATCGTAAAGGCGATATATTGAATGAATTTCTCGTCAAAATGTCACGTAAAATAAACAGAGATAAAACAAAAATAAGGAATACTATAAAAAGTCAACACTTTGACTCTCTCTCTCTCTCTCTAACGCCGTCTTTACTCTTTCTCTCTCTTATTTCGTTAATTTGTTTCCCTCCGTTTCAAAC
CmoSSR00256	p3	(TCT)8	Cmo_Chr01	1958768..1959797	ACCGCTTCAACCTTCTCTGA	59.99	ACTTTAATCGGCGGACATTG	59.96	ACCGCTTCAACCTTCTCTGAGCTTCCCACAACTCCCTCTTCTTCTTCTTCTTCTTCTTCTATCTCGTTCTTCCTCTTCCTCTGTGTGATTTCATGGAGTCTGACCCTGTTTTGACGCAGAAACAGAGCAATGTCCGCCGATTAAAGT
CmoSSR00257	p5	(TTTGT)5	Cmo_Chr01	1959454..1960484	GGCATTGGCCATTACAGAGT	59.96	AAGCCGACATTAACTGGGTG	59.99	GGCATTGGCCATTACAGAGTTCGAGGCTCTGTGTGGATTCATCAGTGTGGAGGTAAATTATTTGGTGACAACGTCAAATCCTCCATGGATGATTAAATTTTGATTTGTTTTGTTTTGTTTTGTTTTGTTTGCAGGAGCTGAAGGATGTTCTTCGTTCTGTTCCTGAGATTTTAGTGATGATTCGTGATGCAGACAGAAACAGAGTGTTGTTGTTAGATGATCCTGCAAATAAAGAAGCGGACCTTAAGGCTGCTCTGAGGTTAGCTTTCACCCAGTTAATGTCGGCTT
CmoSSR00258	p3	(AAT)7	Cmo_Chr01	1965256..1966282	CCAGAAGGCCTCCTACCAAT	60.46	ATGTGGAAATTGAAGCCGAG	60.07	CCAGAAGGCCTCCTACCAATAGAGTTAGTATTTCTCACTTATAAACCCATGATCATTTCCTAAATTAGTCGACGTGGGACTTCTATCATCCAATGGGTTAAAAAAATTAATAAGGAAGAATATAAGTTTAAATATTGATTTATTAGGATTTTTTTACCTTTTTTTTTATATATTAAAGTTATACTGAAAAAATAAAATAATAATAATAATAATAATAAACCTCGGCTTCAATTTCCACAT
CmoSSR00259	p5	(TAAAA)5	Cmo_Chr01	1977116..1978146	CTCCATGCACCACTTGCTAA	59.86	GGCGAGGAAACAGACAAAAA	60.23	CTCCATGCACCACTTGCTAAATTCAGCAAAAAACCAGATGGAAATTATTATTTTTTTTTAAAGATAAATATGATAATTATTTTATTTATTTGAGTTGAAATATGTATATTTATTTAATTGTTTTGCGTTTAAAATAAAATAAAATAAAATAAAATCCATGTGCATTAAATACCCTTCTAAATCAATTAAAATGAGACGGTTTTGGACAAATAAAGAGATCTAAAATGTAAATAGATTTTATTAATTGTTTTTGTCTGTTTCCTCGCC
CmoSSR00260	p2	(GA)11	Cmo_Chr01	1992646..1993673	GCCACGTAGTAAGCAATTTGG	59.66	CAAAGAACCACCGCTCTCTC	59.99	GCCACGTAGTAAGCAATTTGGTCTGAAAATTAACGGAACAAGCATATGAGAGAGAGAGAGAGAGAGAGACCTCCTTATCAGGCGAGGACTCTGAAAGGGAATCATCAGCAACAGGCGATTCTGAATCAGCTTGAACAGCGTCAGCGGCCGCAGCAGAAGCAGAGACTTGGAGAGTTCTGAAGCTTTGGCGCCTCAACTTCAATCCAGAAACAGAATAGACGTCGGCAATGCAGGAAGAAATCGAAGATGAGGGAGAGGAGAGAGCGGTGGTTCTTTG
CmoSSR00261	p5	(CGGGT)4	Cmo_Chr01	1993085..1994110	ACAGAAATTGAAGTTGGGCG	60.11	TCAAAGGTGAATTTCGGTCC	59.91	ACAGAAATTGAAGTTGGGCGGGAGATGAACAGCCATGGATAACATCATAGCCACAGTCTTTCGAGATAGAGAGAATTCAAGAGGAAGACGAAGCCGCACTATGCTCTTCTACTGAAATAAGCTTGAAGTTGAAGATAAGACGGGTCGGGTCGGGTCGGGTCGGACAAACAATTTCAAAACAAATTCAGTTAAGGCCCAAGCCCATACCAAAGGATTAGTTGGACCGAAATTCACCTTTGA
CmoSSR00262	p5	(AGAAC)5	Cmo_Chr01	1993808..1994838	ACACGACAGCCTACAATCCC	60	CTGTTGGAGAGAGGACGAGG	59.98	ACACGACAGCCTACAATCCCCACCTGGACATTATTATTCGCAAAAGGAAACAACACAAAAAGACATTAATGAAAGAACAGAACAGAACAGAACAGAACGACCCCCCCGAAGATTCTATAGTAATTAAAAGTTAAAACGCAGCAAAAGTTGAAAGTAAGTAACTACTACTACTTCCCAACTTCCTCGTCCGCCTCGTCCTCTCTCCAACAG
CmoSSR00263	p3	(TAC)7	Cmo_Chr01	1995357..1996383	TGATTCCACCGTGTGGTCTA	59.96	CTTTTGGCAGCGAATGATTT	60.21	TGATTCCACCGTGTGGTCTAACGTCTTCAATGCTGTATCCGAGGGGAGCTTCGTAGAACAGGGATTTATTACTACTACTACTACTACTACTAGACTTCTTACCACCTTTTGACTCCATTAAATCATTCGCTGCCAAAAG
CmoSSR00264	p2	(AG)11	Cmo_Chr01	1999476..2000503	TCTCCTCACTAACCGATATGGAA	59.97	GCCCACCAATCAGAACCTAA	59.93	TCTCCTCACTAACCGATATGGAATCACATATATATGCTCCAAACATTTACCATAGTGTAATGAATGAACAGTATTTTTTAAAGTAATAAAAAGATGCCAAATAAAATTAAAAAAAAAAAAGAAAAGTAGAGAGAGAGAGAGAGAGAGAGTCAAAACGTCAGTGTCGAGCATCGACTAATATGGCAATGGAAGAACTAAAGTTGAAAACGGCAACAGAAAATCAGAAAGGAGGGTCGTTTTAGAGTCCACTTTATTTAGCAGTGTTAGGTTCTGATTGGTGGGC
CmoSSR00265	p2	(AT)9	Cmo_Chr01	1999876..2000899	CGGTCTGTCGGTCTGGTAGT	60.17	TCTCAATTAGGGTGGGCATC	59.89	CGGTCTGTCGGTCTGGTAGTCATGTTTGAACAACATTAATTTTCTTTTTACAAAAATGTTTACCTAATTCTATTTTCAATATTTCATATATATATATATATATAATAATTAAAAAAAATAAAATAAAATAAACATCAACAGTATTATAGCTTAAGTAAGGAGATGTTCCTTTGCCCTGCGAGGCCGATGCCCACCCTAATTGAGA
CmoSSR00266	p2	(TA)13	Cmo_Chr01	2017899..2018930	AACTTGGAGTGTGCCATAAGTC	58.25	GTCACATGGCTTGTTTGTGG	60.01	AACTTGGAGTGTGCCATAAGTCACATAAGATTTTGGAATATTTATATATATATATATATATATATATATTAATTATTTTAATTTTTGTAAAAAAAAAGTAAACTTAAAAAATATTTAATAAGTTTTTTAATTTTAATTTTATGTTTAATAGATTTTTAAAATTTTAATTATTTAACACATATCTAAACAATTTATTACTCATTTTCTACCCACAAACAAGCCATGTGAC
CmoSSR00267	p2	(TA)9	Cmo_Chr01	2034990..2036013	TGGAGTTGGAGAGAAAGGGA	59.77	CCCACTTCATGTTTTGAAGG	58.05	TGGAGTTGGAGAGAAAGGGAGGAATAGAGGACAGAAGTGGGTGGGTGTGGCTATGAGCAAAAGGAAAATGGGCCCTTAAACGTGGGAGATTGTCACTTCAACAAACCCTTCTATAAAACATTCATAGTTTCAGTTCTAAATTGCTAGGGTTTAGTTATAAATGTGTTAGGGCTGTATAGCTCATCTATATATATATATATATACTCATTTCAATCACATAGATACCTTCAAAACATGAAGTGGG
CmoSSR00268	p2	(AG)11	Cmo_Chr01	2048275..2049302	CCACCATAGCTGCAGTGAGA	60.01	GCATCATCATCCTCCTTCGT	60.04	CCACCATAGCTGCAGTGAGAATAAGCTCAAATGGCAGAGATGGAGACGGAGCTCATTGTAGAGAGAGAGAGAGAGAGAGAGAAATGAGTGAAGCTGAAGGAGGACGAAGGAGGATGATGATGC
CmoSSR00269	p3	(AAT)9	Cmo_Chr01	2049183..2050215	TAGAATGGGCCCACAGTTTT	59.43	CAAAACCAATACCCACCACC	59.95	TAGAATGGGCCCACAGTTTTTGGAATTCTGTCCTTTCTTTTTTCTTATTTTTTTGAATTTGTTGTTATCGTAAACGTGAATAATGTATAAACAACAAATGTGGTGGAAATTTCTAGTGCCAATTTATTTGTTTATAGTTAATTTAAAAAATAAAATAAAATAAAAAATAGAAAATAAATTATAGAGTATGCTGATAAAATTGAAAATAATAATAATAATAATAATAATAATAGGGAAGGCGGTGGGGGGTGGGTGTCAGAGGAAGGTGGTGGGTATTGGTTTTG
CmoSSR00270	p4	(TTTA)5	Cmo_Chr01	2073694..2074719	GGATTTGGTGGATAACGGGT	60.81	AAGCGAAAGCACCGTATTGT	59.77	GGATTTGGTGGATAACGGGTTTAAGAAGAAATAATTGAGAGTGGTTGTTAACAACCTTTAATTGTTTTTGTATTGTATGGTCCTTTCATTCATTTTGATTGCATTATTTTATTTATTTATTTATTTATTTTTTGTGTGTGTTTGTAAGGAGTGGCTTTCGATAGTGACAATACGGTGCTTTCGCTT
CmoSSR00271	p7	(CCAAATT)3	Cmo_Chr01	2086692..2087718	TACTGATTTTCCCTCCACGC	60.07	GAAGCGAAATGAAAAACCCA	60.05	TACTGATTTTCCCTCCACGCGCCGTCGTATGTCATTACGCGCCACTACCCTTTCTCTCTTTTTTGTCATCTTACTTTTCCGACTCTCTTTCTGTCCACTTTGGCTCCACTGTTCCTCTTTTTTTGGATTAGTGGAAACCAAATTCCAAATTCCAAATTCCCCCTTCATCTCCAACTCTTCTTTCCCTTTCTCCGTGATTTTTCAGAGCTAAACCTTAAGGATCTGACTTGGGTTTTTCATTTCGCTTC
CmoSSR00272	p2	(GA)9	Cmo_Chr01	2107167..2108190	CAGAACAGGAAGCAGCACAA	60.18	TCTGTAGTTCCACTTCCCCG	60.1	CAGAACAGGAAGCAGCACAAAAACCGCGAAACGGAAACGGAAAAAAGGGATAGAACCGGCCAGAACGACGTCGTGTAACCACGATAACCAAGAAAATGAAGCTGCTCGAGGCGATGGCACTGATCGAGCGAGAGAGAGAGAGAGAGAGGGATTTGCAGAGGCTGCAGGACGTTTGTAAAGGCCACGCGCGGGGAAGTGGAACTACAGA
CmoSSR00273	p4	(CTAT)5	Cmo_Chr01	2130342..2131367	GAGATCCCACCGAACTTGAA	60.05	ATTGAACGACTTAGCCACCG	60.13	GAGATCCCACCGAACTTGAAATAGCTTCAATAACTATTAACACATCCTATCTATCTATCTATCTATCCCTGCTCAACAAATCAAAATTAAAAGGTATAAACAGACAATTTCCTCGATGGTTTTAGATTGTCCTTCAGAAATGAGAAACCCCTCCCATTTGGATCTCTCTCATGTGGCCATAATCCTAGAAGTAGACCTGACTTGAAAGAAACAGCTCTCCCGGTGGCTAAGTCGTTCAAT
CmoSSR00274	p3	(GCC)7	Cmo_Chr01	2158812..2159838	CGGTGTTGTTGCCATAACTG	60.03	CAACGGCCCAAAAATAAAGA	59.94	CGGTGTTGTTGCCATAACTGGAAGGAGTTGGAGAAGCAACGTTGCAATCACTTCCGCTCAGCACCAAAATGAAGACGCCCATTGCCGCCGCCGCCGCCGCCGCCATTACGCCTCCGGAGTTTGACGAATGTCCCATGGAATTGGGATCTGAAGGAGAAGAACGGAGGGTGAGTGTATAATCTTTGGATCCAAACATCATCTTTATACAATAATAATAATGTTTAAAAAAAAAAAGAAAAGATTGGTCTTTATTTTTGGGCCGTTG
CmoSSR00275	p5	(AAGGC)4	Cmo_Chr01	2166337..2167362	GTGCTCATTTGAGGCCTTGT	60.26	TGGGCTTTCATCACATTCAA	60.05	GTGCTCATTTGAGGCCTTGTGGCTGTCATGGGGGCCTAAGACCTAACATGGAAGGCAAGGCAAGGCAAGGCAGGGCAAGTTTCTTGAATGTTCTAACCAATTTGGATGAGTTTGAAGGAAGCAAACAGGTTGGGAAAAAGGTATAAAGAGAGAGAGAGAGAGAGATGGAGAAGCCTTTGAATGTGATGAAAGCCCA
CmoSSR00276	p2	(AG)9	Cmo_Chr01	2166432..2167455	GAAGCAAACAGGTTGGGAAA	60.09	AGAGGGATGGGAAGGAGAGA	60.15	GAAGCAAACAGGTTGGGAAAAAGGTATAAAGAGAGAGAGAGAGAGAGATGGAGAAGCCTTTGAATGTGATGAAAGCCCAAAAAGACAACAGATCTACCAAACTACTGTTGTATTTGGCAGACTTCTCATAAATTGCTTCAATACTAATACTTCTCTCCTTCCCATCCCTCT
CmoSSR00277	p2	(TA)11	Cmo_Chr01	2181242..2182269	TCTCGATGGATCTCGAATGA	59.27	TCTCTCTTGTGGCGATTCCT	59.95	TCTCGATGGATCTCGAATGAAGAGCTATAGCTCTCGAATTACACTGAAAAAGGAGTCAAATTTCTTGGTTTTCTATATATATATATATATATATATGTGCATGTACTGCACAATTCCTATTCATGTGATGAATTTGTATTTGATATGCATGGTAACAATCTATGTTTTGTTACCCTTTTCTTGAGTCATCTCTTTAGATCGTTAGAAGTTAAAAGTGATAAGGAATCGCCACAAGAGAGA
CmoSSR00278	p3	(TGG)14	Cmo_Chr01	2187272..2188319	TCATATACCGCATCGAGCAA	60.2	GAGCTCTCTGCAGCCACTTT	59.9	TCATATACCGCATCGAGCAAATCACAGTTGCCATCGATCGATGCCCTTCGCAAGGTTTGTCGAGGAAATATGATACCCATATGGAATTTTTTGATAACTCGTGTGAAATCGGAGAAGACGGTGGAGAATATCAGGAGGAACATAATGGTACATGGTGGTGGTGGTGGTGGTGGTGGTGGTGGTGGTGGTGGTGGAGCAGGTGAGAGCAGTAGTGGAGGGTCAGCTACTTCAGGGAAGGAAGAGGGCGGCAGGGGTAAAGGGAGGAGGAAGGATAAAGTGGCTGCAGAGAGCTC
CmoSSR00279	p5	(TTTTA)5	Cmo_Chr01	2216076..2217106	AATGTTTGACATCGACTTGTTG	57.66	TGCATGCACTTATGCCTCTA	58.05	AATGTTTGACATCGACTTGTTGTCATTTATATACATTTGTCAGAAATTGTTATTAAAAAAAAAAAAAAAAAAATTTACCATAAACTCGTGAATAACACACTTTTATTTTATTTTATTTTATTTTAATTTTTTTTTATCCATTTTAGCATGTAACATCATGATGCATGGTTCTATAAATAATATAATAAACTATATAATAAAAAAAAAAAACAATATAATAGTTCATAGAGGCATAAGTGCATGCA
CmoSSR00280	p7	(TAAAAAA)3	Cmo_Chr01	2227309..2228335	CTGGCGCTTAACTCACCAGT	60.45	AAAAGGGAGGCATCACAAAA	59.55	CTGGCGCTTAACTCACCAGTCACCACTCGCCGTCGCCGGAGTTGCCCGGTGTGTCCTGTGGTGAAAATCGACGTCGTTACTATGCTGAACAAGAGATTCTACACTCGGATGGGAAATTCGGTATTTTTTTTTTTTTTAAAGATACAAAAATATCTGACATCTTAAAAAATAAAAAATAAAAAATATTTTGGATCCAAAACATTAAAATTGATTAATTTTTAAAAATTAAAAAAATACTTCATTTTCAAAATTTAGAATATTTTAGTATATTTTGTGATGCCTCCCTTTT
CmoSSR00281	p2	(CT)9	Cmo_Chr01	2238846..2239869	AGCTCCATTTTTGTCCCCTT	59.94	TTCGTTAGGCTGCATGACTG	60.01	AGCTCCATTTTTGTCCCCTTTCCTCTTATGGGGTTGCCATAATGTGACTTTGATGCACCCACCAGCCTCAGTTTTTGGCCACAATGGCCTAATTTTGCTTGTTTTAGCTCTCTCTCTCTCTCTCTATGCAATCCTATATATATGAACCCTCTGTTAGCAACCTCCCCAAGTTCCTCTTGAACTTCCAAGAGCCTGCCTGCCTGCCTGCCTGCCTGCAAGGTTTCAAAAAGCTCAGTCATGCAGCCTAACGAA
CmoSSR00282	p4	(GCCT)6	Cmo_Chr01	2238929..2239958	AGCTCCATTTTTGTCCCCTT	59.94	TTCGTTAGGCTGCATGACTG	60.01	AGCTCCATTTTTGTCCCCTTTCCTCTTATGGGGTTGCCATAATGTGACTTTGATGCACCCACCAGCCTCAGTTTTTGGCCACAATGGCCTAATTTTGCTTGTTTTAGCTCTCTCTCTCTCTCTCTATGCAATCCTATATATATGAACCCTCTGTTAGCAACCTCCCCAAGTTCCTCTTGAACTTCCAAGAGCCTGCCTGCCTGCCTGCCTGCCTGCAAGGTTTCAAAAAGCTCAGTCATGCAGCCTAACGAA
CmoSSR00283	p3	(TAT)16	Cmo_Chr01	2247301..2248354	CAATGGCCCTTTTGGATAAT	58.76	TTAAAGTTGGGGCAAAGTGG	59.97	CAATGGCCCTTTTGGATAATATCCTATCATCAAATAAAATAAAATATTATATTATTATTATTATTATTATTATTATTATTATTATTATTATTATTATAATGTTGGCCAACCAACAATTTTCTTATCCCATTAATTATTCACCACCTTTTTTTAATTTATTTATGCAAGCTGACACATTTCCCACTTTGCCCCAACTTTAA
CmoSSR00284	p2	(TA)11	Cmo_Chr01	2252761..2253788	TGGTCTGATTATACCGAGGATT	57.58	GGGAAGCATCGCATGTATTT	59.93	TGGTCTGATTATACCGAGGATTATCTACAAAAATTAATTATATTATTTAAAATTATAAACGTTACATCTTAATTTTCATAAAATTGTAGGAATTATTTTTTAATCTAAACTATATATATATATATATATATATTTTTTTTTTTTTTTAAATTGAATTTTGGGCCTTTATCCTAAGATTCATAAGCCCAAGCTTTGAGTTTTGGGTCTGATCATTTAAAACAAATGCTAAATACATGCGATGCTTCCC
CmoSSR00285	p2	(AT)10	Cmo_Chr01	2252955..2253980	AGCCCAAGCTTTGAGTTTTG	59.49	TAAGAGCGAGGGAAAATTGG	59.29	AGCCCAAGCTTTGAGTTTTGGGTCTGATCATTTAAAACAAATGCTAAATACATGCGATGCTTCCCTTGTGCTTTAATATTTTAATATAATCTTTCATTATTAAATAATAAAGTTCATAACAAATATATATATATATATATATCATAAATATATTTTATTTTTAAACTTAAAATACTTTAATGTTTTTATAATTCCAATTTTCCCTCGCTCTTA
CmoSSR00286	p3	(AAT)8	Cmo_Chr01	2265776..2266805	AACCTTTGACATTTTGGAGTCA	58.6	GCTGTCCTCAATGATTTGCTT	59.33	AACCTTTGACATTTTGGAGTCATTTATCATGCTCGAAATAATAATAATAATAATAATAATGATAATAATAATAACAATAATAATAATAATGTTTGGTAACAAATTGATTGAAAAAGCAAATCATTGAGGACAGC
CmoSSR00287	p3	(ATT)10	Cmo_Chr01	2277958..2278993	TGCATTGGAATTGGCATCTA	60.04	TCCTGGTCGCTTCTGATCTT	59.95	TGCATTGGAATTGGCATCTAACAGTATGCTCTGGAACTTCTTTCTTGTTCTTGCCATCGTTATTATCATTATTATTATTATTATTATTATTATTATTTAGGTAGATTGGTGAGTCCCTCAGATCGTATAAAGTGTATTCAAATTCTTGTCTGAGCAAGAAAACTGTCACTAAATTAGTGTAATTGATCCCAGAGTTCTGTTCTTTAGTTGAAACTGAAGTAATGAATTTTGGTGTTCATATTTTAACCTGGAGGATATTGTTATTGTTGTAGAGAAACAAAGATCAGAAGCGACCAGGA
CmoSSR00288	p5	(TGTTT)4	Cmo_Chr01	2278631..2279656	TAATTTCCCGTCTTTCGCTG	60.2	TTCAACACACTGAAGCTGCC	60.03	TAATTTCCCGTCTTTCGCTGCAACGAACACATTTTTCTGGATTTCACCAATTAGTGCTATAGAGCTTCCTAAAGATCCTATAGAGTTTGCTGCTTAAGATGTTTTGTTTTGTTTTGTTTTTGTTTTGAATTGGATTAATCCAGGTTGAAGAGGCCTCCTAGGTTAGTGGAAGTACCTCAAACTCTTCCAGATGGAGGTATTGAGGCAGCTTCAGTGTGTTGAA
CmoSSR00289	p6	(AACCCT)5	Cmo_Chr01	2283944..2284979	AAGGGCCTGCTAGGAGAAAG	59.98	GACTCTCCTTCGTCCTCCCT	59.81	AAGGGCCTGCTAGGAGAAAGAAAAAAAAAAGTTAAAAAAAAAAAACTAGCTTTCCAGAAGAAAATGAAGACAACGTCCAAAAAAGAAGAGAATCGTGTGAGAAGGTGAGGGAGAAGAAGAGCAAGAGGTCTGAGAACCCTAACCCTAACCCTAACCCTAACCCTAATTCTATTCTGGTTCAAGAAAACAGGAAAGGCAAAGGGAGGACGAAGGAGAGTC
CmoSSR00290	p5	(ATTTT)4	Cmo_Chr01	2284106..2285131	ATCGTGTGAGAAGGTGAGGG	60.11	TGGAGCCCACTTTTACTGGT	59.59	ATCGTGTGAGAAGGTGAGGGAGAAGAAGAGCAAGAGGTCTGAGAACCCTAACCCTAACCCTAACCCTAACCCTAATTCTATTCTGGTTCAAGAAAACAGGAAAGGCAAAGGGAGGACGAAGGAGAGTCTTGGAGAGAGAAGATTCATTTTCAAACTGTGTTCTTTTACAGAATACGCGTTTTTCATTTTCTTCTCTTTTTTTTTAATTTTATTTTATTTTATTTTCCCCTTCGTATTTAATTTCTACGGGAGAGATATAAATTTGGGCCACCGGACATACCAGTAAAAGTGGGCTCCA
CmoSSR00291	p3	(ATT)9	Cmo_Chr01	2290696..2291728	AAATGAAGGCAAGCGTCAAT	59.71	ATTTCCCCCATTTTCTGCTC	60.27	AAATGAAGGCAAGCGTCAATAATTTCCTTTGTTTTTATTATGTTTTTTATGTTATAAATTAAATGATGCAAAATATATTTATATCTTATTGGTGTTTGTTTTTTAGTACTTGATCAGTCACTTCTTTGAATACCCAATAATTGCCTCAAGGGATAAATAAATAGTTCGTTTTTTAAAAAATACACATATGACAAATTATTATTATTATTATTATTATTATTGTTAAAATTAAAAATAGAAATAGAAAATAATTTACATTTATTATTGGACAAAGGAAAAGAGCAGAAAATGGGGGAAAT
CmoSSR00292	p3	(ATT)8	Cmo_Chr01	2292363..2293392	CTCTTTCGAGCAGTTCTCCG	60.27	GTTACTCCAATGCAGCCGAT	60.1	CTCTTTCGAGCAGTTCTCCGGGTACGTGACCGTGAACCACGTGGCAGGTCGAGCCCTCTTCTACTGGCTCACTGAAGCCTCCCTCCAACCCCTCTCCAAGCCCCTCGTCGTCTGGCTCAATGGAGGTCAGTCTCAACCTCTCCCCATTCTCTACACATTATTATTATTATTATTATTATTTTTAAAGTAAATTAAAAATTATAATAAAAAAATTATAAAAAAAATTAAGAAATGTAGGCACTGTTTCATCGGCTGCATTGGAGTAAC
CmoSSR00293	p7	(AAAATAA)3	Cmo_Chr01	2292715..2293741	TTTAATTTTCCGTTGCCGAC	59.94	TGGGGAGTTATTAACCGTGC	59.82	TTTAATTTTCCGTTGCCGACAAGATAATATAATGATATTTATGAGACGAAAATAAAAAATAAAAAATAAAAAATAGAGAAATTCTTGGAACTGTGTAAAAACTTTAATTGCGGCTTTGAAAATGAGAGGATTATTTTTATTTTTATTTTTTTATTTATTTTGGATTGAAATTGAAATTTAGCCGTTTGTGGTGGGTGGTAGTTAGTTTTATTTACTGCAGTAAAAGGACATGCACGGTTAATAACTCCCCA
CmoSSR00294	p3	(TCT)8	Cmo_Chr01	2305794..2306823	CAGCTCGTGTATGGTCGAAA	59.86	GGAAACCCCCACTTCAAAAT	60.03	CAGCTCGTGTATGGTCGAAATCAAACGCCAACGCAGCGTACAGTCTGACTTTGTCTTCTTCTTCTTCTTCTTCTTCTTCATTTTACTTCCATGGTGCCCTTTTTTTTTAGTGATGTTGATGCAATCTCTATTTCTGGCTTTCATTCTTCAGTTTTAGTCGTCGAATCATGATTTTGAAGTGGGGGTTTCC
CmoSSR00295	p2	(AT)10	Cmo_Chr01	2311227..2312252	TGTCGACAGTCCTGCTTCTG	60.18	TTAGGCCAGCCCCTTTTTAT	59.93	TGTCGACAGTCCTGCTTCTGTTTCAAAGCTTATTACAGAGTTTGTATTTCATAATTCCTGCTAGGAATTCTCCATATATATATATATATATATACACACACATATTACCTATCTTATTGTTATAAGATTAGTTATGAGAACTGTTGTATATAATCTTTAGAAAAGCCACAATTAATTGATTATAACCTCTTTCACCTAAAAGTTCTCTTCTTTTGCAGTGGGTAAATTAAGGATTGTTTAGAAAAGTGGTAGTGTTTTACAATACTTGGTATAAAAAGGGGCTGGCCTAA
CmoSSR00296	p2	(AT)9	Cmo_Chr01	2317614..2318637	TGAATTTCGAATATGTCAGGGA	59.41	GGGTCACGAGTGTGTGTGTT	59.47	TGAATTTCGAATATGTCAGGGATAAAAACACAATTTTCAATATCTCATTCACATATAGCATTTATTACTTCATACTTGCAATATTAAATTAAAAAAAAATATATATATATATATATAAAATTTTGTAATAAAAAAACCCTAATCCTTATAAATAAATAAATAAATAAATAAATAAAAAAGAAAATAAAATAGATTTAAATATAGTAAATTTGAATTTAAATTTAAATTAGATTACAGGAAATCTAAAATGGAGCAGAAAAATAACTAACACACACACTCGTGACCC
CmoSSR00297	p4	(ATAA)7	Cmo_Chr01	2317663..2318696	TGAATTTCGAATATGTCAGGGA	59.41	GGGTCACGAGTGTGTGTGTT	59.47	TGAATTTCGAATATGTCAGGGATAAAAACACAATTTTCAATATCTCATTCACATATAGCATTTATTACTTCATACTTGCAATATTAAATTAAAAAAAAATATATATATATATATATAAAATTTTGTAATAAAAAAACCCTAATCCTTATAAATAAATAAATAAATAAATAAATAAAAAAGAAAATAAAATAGATTTAAATATAGTAAATTTGAATTTAAATTTAAATTAGATTACAGGAAATCTAAAATGGAGCAGAAAAATAACTAACACACACACTCGTGACCC
CmoSSR00298	p6	(TTGATT)4	Cmo_Chr01	2318420..2319449	ATTTCGCCATTCAAATCAGG	59.9	GCAAGGAAATGAAAATGGGA	59.88	ATTTCGCCATTCAAATCAGGTTTTCGAGTTTTTTTTCTTTTTTTTCTTTTTTATTAACTTTTCCGATGTTGCATAGTTTTACAGGTTTCAATCATCGTTGATTTTGATTTTGATTTTGATTTTGATCAGATCATTCAGTTTGTTACTCCCATTTTCATTTCCTTGC
CmoSSR00299	p4	(AATA)5	Cmo_Chr01	2333520..2334545	TGATGTGTGTGGCATAAAAGAA	59.09	TTGTGTTGTATGGTGAATGGTTC	59.65	TGATGTGTGTGGCATAAAAGAAAGTTGTCTAGCTAGATAAAATAAAAGTTTAATAAATAAATAAATAAATAAAGCAAATTGCATTCTAAATCCACTTCTTAGCATAATTAAGATCTAATATATGAACCATTCACCATACAACACAA
CmoSSR00300	p2	(TC)10	Cmo_Chr01	2334050..2335075	ATCAGAGCCCAACCATTGAG	60.07	GGAAACACAGAGCAAGGGAA	60.23	ATCAGAGCCCAACCATTGAGACACAGACTGTGGCTTCTGATGTCCATCTCACTGCGATAATTAAGAGAAAATGCATCAGAAACCACACCTCTCTTCTGCTCTGCTCTGCCCCTTCTTTCTTTAACTGCATGCTTTGCATTGCCACTCTTCTCTCTCACCGCACTCACCACGCCTTCTCCCTTTCTCTCTCTCTCTCTCTCTCTTTCATTTCACTTCAGCATTTCTTTTACCACATTCAATTTCCCTCACAAACAAATTTACTTCTATTTTTCCCTTGCTCTGTGTTTCC
CmoSSR00301	p5	(CTTTT)4	Cmo_Chr01	2335339..2336364	TTTCATTTGTCGTTTTGCGA	60.23	TTTTGGTTCATTTCACTAAGGC	58.3	TTTCATTTGTCGTTTTGCGATCTTTTTATGCGTTTTTTTAATGACAAATTAATTTCTTATTTTAGAAAATATGTTCTTTTTGATAATTCCGTAGCCCTTTTCTTGGATATTATTTAATTCACGAAAGTCATTTTAAAGCCTGTATGAATGGAATATGTGGAAGATGCCCTTTTCTTTTCTTTTCTTTTTCTCCCTTTGGGTCAATTCTTATAATATTTAAAACAGAAATTAAATTTTTATTTGGATTAAAAAAAAAAAAAAAAAGGCCTTAGTGAAATGAACCAAAA
CmoSSR00302	p2	(AG)15	Cmo_Chr01	2336809..2337844	CTATGGGCCAACACACACAC	59.88	TGCAGAACATGGCGTACATT	60.14	CTATGGGCCAACACACACACACATAGCAAATGGGATATAACTAACCAAGCCTAGAGAGAGAGAGAGAGAGAGAGAGAGAGAGGCACATGGGAAAGCACATGGCAAATAATACATAAAATTAATAATAAAAATAAATAATAAAGTAAGGGAGTGTTTGGATGCTAGCTTTTAATAGAGGGGCTTATGCATGTGACAATGTCCAAACGAGAGACACTAAAGCAGCATCAAATGTACGCCATGTTCTGCA
CmoSSR00303	p7	(TTTTTTA)3	Cmo_Chr01	2337244..2338270	CCATGTGGTCTCATTCGTTC	58.93	TCCTTTTCATCATTGCTGCC	61.12	CCATGTGGTCTCATTCGTTCATTATCATAATACCATTCTTTTTAGACTACTAGGTTTTTTATTTTTTATTTTTTAGTTCTATATCAACCTGAAATTAACCCAATTAATTATATAAACTTTTAGATATAAAATTCAAAATTCTTGGTTATATTAATAATTTTTTAAAAAATATAAGAAATAAATAAATAAAAAGAAAATACAAAATTCATATTACTGGAAATAAATAATTTTTTTTTTTTTTTTAGAGAGAGATTTTAAATTATAGTCCACAATGGGCGTGGGCAGCAATGATGAAAAGGA
CmoSSR00304	p5	(TTTTG)4	Cmo_Chr01	2350248..2351273	CGGTGGCAATACTTCCTCAT	59.96	TTCCCTTAAACTTGCCTGGA	59.68	CGGTGGCAATACTTCCTCATTATTGACTAGGGATTCAGTTAAGAAAATCACTCTCGCACTAGGACAAAATAATTCCTTCTCTAGAGGTTTTGATAAGATCCTTCACATGCTTCTGGTTAGTTAACTTTTTGTTTTGTTTTGTTTTGTTTTCCTGTTGATTTTATTTATAGATGTCTGATGTACGACTGAAACTCTGATAACATAATTGTCCTCATCCAGGCAAGTTTAAGGGAA
CmoSSR00305	p2	(TC)18	Cmo_Chr01	2360931..2361972	TCCCTCCAACCTTCAAACAC	59.94	GAACATCTCTGGGTCTCCGA	60.2	TCCCTCCAACCTTCAAACACTCTATGCTTCTCTCTCTCTCTCTCTCTCTCTCTCTCTCTCTCTCATTGCAAATTAGATGAAATTGGATGATGGTTTTAGCTCAAAGGCTAATTTAATAAAAATATAAATTTATTTTTGAAATACTGATGAAAACTTGAAGGCATTTTTAAAATAAAAATAAAATTAACCGTTTCCATCTAAAGCTATGCTGCAAAGTTCAAATAAAGTTGTATAATCCTCGGAGACCCAGAGATGTTC
CmoSSR00306	p3	(TTA)7	Cmo_Chr01	2363342..2364368	TATGGCCACCTAGACGAAGG	60.09	AAGGAAATCCCAATCCCAAC	60	TATGGCCACCTAGACGAAGGATGAAGTCAAATATTAATTTGAAAAAAGTAACAAGTAACTCGGGCGGTGGAAGTCTATTTCCTTTTACCTCTAGTATTTGGGTACTGGTGAAATACGCTAATTCCGTTTTAACACACTTGTAGAGATACAGGTGTTATCACCAGTTCTCCTTGTTTATTTTTTATTATTATTATTATTATTATTTTGTTGGGATTGGGATTTCCTT
CmoSSR00307	p6	(ATTTGG)6	Cmo_Chr01	2375974..2377015	TCCAAAGGGGTGGATCATTA	60.13	TCCCTCAATCTCGCATTTCT	59.77	TCCAAAGGGGTGGATCATTACGGGGGTGAGTTTAGTTCTGAATCCATGGGGGGTAGCCATTGTAGTGGCTTCAAAGCTAAATCGCCATTGAAAAGAGCAACCCATTTGGATTTGGATTTGGATTTGGATTTGGATTTGGATTCAGAAGAAGAAGAAGAGAGAGCTAAAGTGGGAGTGTTCCCAGAAGTTGGGAGATACTTGAAACCATTGAAGAAGAAATGCGAGATTGAGGGA
CmoSSR00308	p7	(TTATTAT)3	Cmo_Chr01	2385762..2386788	GAGATGACTTGGGGATGCAC	60.48	CACGACAAAACAATTGACGG	60	GAGATGACTTGGGGATGCACGATGAACCGTCCATTATTATTTATTATTTATTATTTTATTTTAATTTATTGAAAGATGAACCGTCAATTGTTTTGTCGTG
CmoSSR00309	p7	(CGGGAAG)3	Cmo_Chr01	2414262..2415288	TTTTACCTGGGTCTGCAAGG	60.1	CAGCCACAGCCATCAAGATA	59.82	TTTTACCTGGGTCTGCAAGGATCATCCGTGATCGCAGGAGAGCGACATTGAATCTGAACAATCCTGCTGAAATATCGGCAAATTGGGACGGGAAGCGGGAAGCGGGAAGCTAACGTGTTGACTAGCTAAGATATGAAGTCGGCTATCTTGATGGCTGTGGCTG
CmoSSR00310	p2	(TA)10	Cmo_Chr01	2418871..2419896	GTTTGAGCTGTTACCCGAGC	59.88	CCCTCCTTTTTGCTTTTTCC	60.05	GTTTGAGCTGTTACCCGAGCCAACTGAAGCCAAACCTAACTAAAAAAATCGACCCAGTACTCCAAAATCACTCTCGTTTAGATATGATCTCGATTCAAGAAGATTTGTATATATATATATATATATACACGTACAAGATTGGGTATGATTTCCAAAATCAACAAGGAAAAAGCAAAAAGGAGGG
CmoSSR00311	p2	(AT)21	Cmo_Chr01	2425403..2426450	GAAGCTGAGGGAAGAATGGA	59.36	CGGTTTCTTGGGATGGTTAC	59.29	GAAGCTGAGGGAAGAATGGAATAGAAACTGAACATCAATATATATATATATATACACATATATATAGATACATACATATATATATATATATATATATATATATATATATATATATATTCAAATTAATAATTTTTTAATTCTTATTTAAGTGAGAGCGAGCTTATCTTGGAACTTGGTTTGAGCTCAACGTTTCCATTTATTCATCATCGAAGAACGTCCATTAATTAATAATATATAAAACAAATAAATCAGTACAATTTTGTAACCATCCCAAGAAACCG
CmoSSR00312	p3	(CAC)7	Cmo_Chr01	2435920..2436946	GAACAAACCCACCCAACAAC	60.11	GAAACTGATTTCGCCGATGT	60.08	GAACAAACCCACCCAACAACAAGCCCTCCATAAACCTAGCCCCCGACGAGCCCTTCACGCCAAACCCATGGCTCGCAACGCCCAGCGTTGCCTCAGAATCATGCACCACCACCACCACCACCACCCAGAAGCCATTACTCAACACCCATAAGACCCATAACACTAAAGGCTTTCTTTCCCACGCGCTCGGCTATTACTGCATGTGTTATTCACGCTCCGACAAACCCTCCGACGACATCGGCGAAATCAGTTTC
CmoSSR00313	p5	(AACCA)5	Cmo_Chr01	2441319..2442349	CAAAGATCGACACACAACGC	60.31	GAAGCTTTGGAACCAACCAA	60.09	CAAAGATCGACACACAACGCTTTATCAAAATAAAATTTAGAATGTTCCAAATATCCAACCTATAAATAAGATAAGAGAATAGCTTTTCCACCTTTTCGGAATAGTAATTTCAATCATTCCAAAATCATTTCCGAACATGCCAACCAAACCAAACCAAACCAAACCATCTGGTTCCATTTGGTTGGTTCCAAAGCTTC
CmoSSR00314	p5	(TTGGA)6	Cmo_Chr01	2458069..2459104	CCAACGGGTTAAATGGAATG	60.05	TTGCGATGCAAAAATTGAAG	59.82	CCAACGGGTTAAATGGAATGTGAATTTACGAAAATACCCTTGAGACCGTTGGATTGGATTGGATTGGATTGGATTGGACGCAAAGACGTGGAGGTTTCGAGCGAAGAAAACTCCGCCTATATATATCGAACCAGGTCCACCCTCCTCCAGATTCCTTCTTATTTTAGTCTTTGGCGGAATCAATCTTCTATTTTTGATTTTCTACGCTCTCCAAAAGCTTCTACATTCCGCACATAACGCGCTTTCTCGGTTTGTTTTTTTTTTTTTTTCCTTTTTTTCTTCAATTTTTGCATCGCAA
CmoSSR00315	p6	(TCCTCA)4	Cmo_Chr01	2462554..2463583	ACAATTTGCGATTGCATCAG	59.69	CCGAAACAGACGACGAAAAT	60.11	ACAATTTGCGATTGCATCAGCAGCAGGGGCACCCCTCACCCCTCACCCTCACCCTCTTCCTCATCCTCATCCTCATCCTCATACTCCTGCTTGAACTGCAACTGCAGCAGTCAACCATGTAATAAATACTATATTTTCAAACATGAAAAACCTTTCTTCATCTACTTGCTCTTGTTGTCGTCGTGGTCGTCATTTGTATGTGCCAACATTTTCCCTCAGCTTTTTGTCATCTTCCAAAGCTAGGTACAGTCACTAACAAACTTATATTATTTTCGTCGTCTGTTTCGG
CmoSSR00316	p6	(GTTCTT)4	Cmo_Chr01	2467856..2468885	TCTCGGTGGAGCTCACAGTT	61.01	TGGGTCTTCCCCAATCTGTA	60.31	TCTCGGTGGAGCTCACAGTTTCGTTCTTGTTCTTGTTCTTGTTCTTGTGTGGTGGAGGGTTTTGATCCGTTTACTCAGTTGTTTTTGTGTGTTTTTTTGTTGCAGAGGCTACTCCTAAGAGCTTGATGCGTGCCATGGGTATCACTGGCCTTACTCTCTATCATCTCAAGAGTCATTTACAGGTTCTTCGTCTATTTCCTTTCAATCTATGGGTGTTCTTCATTGGATCATTAAAAAACTGATTTGGGTTTGTTTTTATATCAGAAATACAGATTGGGGAAGACCCA
CmoSSR00317	p7	(TTGGGCC)4	Cmo_Chr01	2472880..2473913	TGTCCACTCGATCACAGGAA	60.25	CCGAAAACCGAACTAAACCA	59.97	TGTCCACTCGATCACAGGAAAAGAAACAACAGAGTTATATCGTTCAAATTTTTGGTTATGTGTGTATGCATTTCTAATCCAACTCGGGGTTATTGATTATTTTAACCCTAACTTAGATTTGGGCCTTGGGCCTTGGGCCTTGGGCCTTATTGGGTTAGAGATACAAATAAGGTATGGGCTTACAAATGGGGGCTTCACCAATAAACCGGTCTATTGGTTTAGTTCGGTTTTCGG
CmoSSR00318	p3	(AAT)8	Cmo_Chr01	2507675..2508704	TCACACCACTCATTGAGCATT	59.15	CGCACCTCTATGGTTTGATG	59.15	TCACACCACTCATTGAGCATTAGTGTGTGTAAAGCTTTTAGTAAATATCTTTGAGGTCTCATTTTGTCTTTGAAATCTCTTGTTATACACATTTTGGAGGTTGATCTTTTTTATTCCCTTTATATTCTTTCATTTATTCTTACAGAAAGTTTGGTTTCTCTTTCTAAAATTTTAAAATAATAATAATAATAATAATAATCAATACAAATCCATTAGTGGCCAATTGAAAAATGCATAAACCACTCCTAAACTAATTAAGACATCAAACCATAGAGGTGCG
CmoSSR00319	p5	(AAATT)4	Cmo_Chr01	2525787..2526812	ATGCAAGGTGCTCCTGTTTT	59.74	TGTTTTTAGAAATTGTGCCGC	60.12	ATGCAAGGTGCTCCTGTTTTTTCAGGTAAGAAGGATAGAGAAAATACTCCGGCCAATTTCGAGTACTTATATATATATATATAAAAATTAAATTAAATTAAATTTTTTTTTAATAAATTAGCAACAAATTTAAATGATTTCATACAAATAATAAAATAGGATAAATATATTATAATGCGGCACAATTTCTAAAAACA
CmoSSR00320	p2	(TC)11	Cmo_Chr01	2529485..2530512	TCTCCGATCCTCACTCGTCT	59.94	ACAAAAGGCGATGAAACCAG	60.11	TCTCCGATCCTCACTCGTCTTGGTTTATGAGGTTTTAATTGTTTTCCTTCTCTCTCTCTCTCTCTCTCTCTTAACTCTTTGATGTTTTTCTCGTTAGGCCTGGCCGACGATTTCGATTCATAGACTTCGTTCATGGATCTGTTTGCTTTTGTGTGTCGGTCACTTGTGATTTCAGATTTCAGGTTTTTTTAAGCAAAATTTTGTCCCGGTTATGTTTTGTATTGATTTTTAATTTGTACTTGATCCTTTTTTTTATCTGATATTTTATCGATCTTCTGGTTTCATCGCCTTTTGT
CmoSSR00321	p2	(AG)14	Cmo_Chr01	2536516..2537549	CCCTTTTCGCTCATCGTTTA	60.2	AACTCGCCACCCTAAATCCT	59.96	CCCTTTTCGCTCATCGTTTACCTTCATTCCAAGAAGCAAGTCAAAAGTATTGGTTAATTAATACCACAAGCTGATAGCAAACAAAACAAATGTGGAGCAGAGAGAGAGAGAGAGAGAGAGAGAGAGAAAGAGAGGCAAGAAGATTTAAGATTGAAAATAGATGAAAAAAGGAGTGTCAATAAGACATACGGAAGGAAGGAGTGTTTCATTCTTGCTTGCCACTTTTCTCATCGGAACCTTTCAAGAAGCGGAGGAACCAGTAAGCAGAGGATTTAGGGTGGCGAGTT
CmoSSR00322	p2	(AT)24	Cmo_Chr01	2560274..2561327	CGTGTCGAAATTTCATCCATT	59.81	GAGAAAAGGAGGCCGAGACT	59.96	CGTGTCGAAATTTCATCCATTATTTATCAGGTAACTTTATTTAATTATATATATTCATTTAAAAAGAATTTAAGGAATAATTTCTAATTTTCAATAATATTTTATAATATATATATATATATATATATATATATATATATATATATATATATATAAAGTTGAATGTAATTTCTAAAAACTAAAATTTATAATTAATATAGTTTTCTGAAGTAAATAAATATATATATATATATATATATTTATGAGATAGGGCGAGGTTAAGCTAATGAAGAGAAATTAGTCTCGGCCTCCTTTTCTC
CmoSSR00323	p2	(AT)11	Cmo_Chr01	2560385..2561412	CGTGTCGAAATTTCATCCATT	59.81	GAGAAAAGGAGGCCGAGACT	59.96	CGTGTCGAAATTTCATCCATTATTTATCAGGTAACTTTATTTAATTATATATATTCATTTAAAAAGAATTTAAGGAATAATTTCTAATTTTCAATAATATTTTATAATATATATATATATATATATATATATATATATATATATATATATATATAAAGTTGAATGTAATTTCTAAAAACTAAAATTTATAATTAATATAGTTTTCTGAAGTAAATAAATATATATATATATATATATATTTATGAGATAGGGCGAGGTTAAGCTAATGAAGAGAAATTAGTCTCGGCCTCCTTTTCTC
CmoSSR00324	p5	(AAAAT)5	Cmo_Chr01	2587987..2589017	AGACTTGGACAGCAACCACC	60.16	GCTGTGGAACTTTGACCACA	59.73	AGACTTGGACAGCAACCACCCTAATGATAACGAAGGGAATAGTCGTAGAAGCAATGAAGCTCGTAGTCAAAATCGTGGTTTCTCTTGATGATACGGTTCATCGAGTAAGAGATCAAACAATGACTAAATTCAAACTTTGTTTAAATTATTGAAACTATATTTATAATTTAACCAAAAATAACACCAAATTATGTATTTATTGCTTTGTTTGATTTGAAAAAATAAAATAAAATAAAATAAAATAGGACTGCCAGCTGTATATACAGATTTGTTGAGGTCGTGTGGTCAAAGTTCCACAGC
CmoSSR00325	p6	(TATATC)4	Cmo_Chr01	2593091..2594120	TGAGTGCATGCCTACAAAGG	59.86	TTACACCTACTGCCCAAGGC	60.13	TGAGTGCATGCCTACAAAGGGCTTTATCTGATTATATCTATATCTATATCTATATCTATATATATATATGAAAGTGAAAAATATTAGAAAGTGTTCTTGTAAATAAATATATCACGGAAACTTAAATACTTACCTGATTAAACAGCAGAGAACAATTGCCTTGGGCAGTAGGTGTAA
CmoSSR00326	p6	(AAAAAT)4	Cmo_Chr01	2603926..2604955	CTGGCTCACACTCACGGATA	59.86	GGCCTGTTGGGAATACTGAA	59.93	CTGGCTCACACTCACGGATATAAAAAATAAAAATAAAAATAAAAATAAAATAAAATAAAAAATCAATGGCCAACTGGTTCAAGCAACAATGCTAGATACTGAGTAATTGCAATAATGTTCACTTTATGGACCCCGTTACATTTTTCTCGGTGGATAACAGGAATATTCAGTATTCCCAACAGGCC
CmoSSR00327	p4	(AATA)5	Cmo_Chr01	2614836..2615861	GGTTTGAGTCTATCTATTTTTGCGA	60.04	GGGTTAGAAGGAAAGAGAGAAAAA	58.57	GGTTTGAGTCTATCTATTTTTGCGAAAATTTTCTTATGAATAAAATAAAAAATCTCAAAAAAAAAAAAAATCTAATTATTTTAAAAGAATAAATAAATAAATAAATATAATTTCTATATATGTATAGAAAACATTCAAATAAAAAAAAAATATTTCATAAGAAAAAATATAATATAAAGTTGACTATATATAAAATATTTATTTTATTGGCTAATTAATTAGTCAATAAATAATAATTTAAAACCATTAAGACCCATTTACACAAATTAATGAGTGTTTTTCTCTCTTTCCTTCTAACCC
CmoSSR00328	p5	(CCGAC)4	Cmo_Chr01	2622925..2623950	GGGTTGGTTAATGACTCCGA	59.79	GCTGCAACCATCACAACAAG	60.31	GGGTTGGTTAATGACTCCGAACCACACCAACCCAAAAAATTTATGGTTAGATTGGATTGAAGATGTCTCAGTCCGACCCGACCCGACCCGACCCAACCCACGAACACTCCTAAGTTATATGATAATTTACAATTAGGTTTACGATAAAGAACGAACACTAATTTGATCTAATTTTATACCTCGAGAATGATACGTTAAAACTTTATGTAATTTAACCTAATTTGAACTACTTGTTGTGATGGTTGCAGC
CmoSSR00329	p2	(AT)11	Cmo_Chr01	2630814..2631841	TTGCAACAACAAAGGGATGA	60.09	CTAGCCAGCCAGAAAAATGG	59.84	TTGCAACAACAAAGGGATGAGAACCAAAACTTGGAACCCAAAAAGCACTATGAAACTAATGAATACAATCACCATGGATGCTATAGAAGTGACTATAATTGTTGGAGTAACAGAAAGGAGACAAGGGAATAGTGCTTCTTTTCTCAACATATATATATATATATATATATGTTTGTTTATGCATGTATGTTTTTGTTCATGTTTTGTATAAGTTTAATACCCATTTTTCTGGCTGGCTAG
CmoSSR00330	p2	(CT)11	Cmo_Chr01	2639695..2640722	GCAGCACAACACGAGAAAAG	59.64	GGATTCCGCACTGTTCATCT	60.08	GCAGCACAACACGAGAAAAGATGAAATCAAACTATAGAAAGACTAGGGCTCAAATTAGAGAAAGAGAGAAGCGTACGTAAAACGGTCTCAAATCTGAATTCAATAAGATAGCTCTCATGTTGCTCTCTCTCCCTCTCTCTCTCTCTCTCTCTCTTATTGAGTCTGGTAAAATCTACCCCTCTACCTCTGAAGTCGCGATAACTAGGCAATAATTATCCACAACGCTAGATGAACAGTGCGGAATCC
CmoSSR00331	p2	(AC)10	Cmo_Chr01	2640138..2641163	GAACCAATGGAGGAAGCTCA	60.2	CCGTCTGAATTGTTGAAGCA	59.84	GAACCAATGGAGGAAGCTCATTCACAGAGAGCATCAAAATCGTATATCCGTCAACAAAATCAAAAGCACAAAAAAATCGAAAAAACTAAATACACACACACACACACACACATTCATCTATGCTTCAACAATTCAGACGG
CmoSSR00332	p3	(TCT)8	Cmo_Chr01	2640320..2641349	TGCTTCAACAATTCAGACGG	59.84	GCCAGAACGCCTTAATTTCTC	60.22	TGCTTCAACAATTCAGACGGAAAAACGAAGAACAAAACAAAACTACTTTCTCGTTTCGCCAGACAGAACAAAAAAAAAAAAACTAAACTACAAATCTCATCGTCATTACACTATACGAAAGAAAGAAAACAAAACCTAACGGAAAGCAGATCGTCTTCTTCTTCTTCTTCTTCTTCTCTTCTTCTTCAATTTCCACTACTGGCTCTTCTTATTCTCGTTTCAAGTATAAACTACTGCTAAGGAAAGATAGTTACAAAAGTTAGTTCAAGAGAGAAATTAAGGCGTTCTGGC
CmoSSR00333	p2	(TA)31	Cmo_Chr01	2644615..2645682	CCCAATGGTTATCTGGGCTA	59.78	GAAGGGTCATGTGATTGCCT	59.93	CCCAATGGTTATCTGGGCTAGATCGAATCTTTTATGTTAGGAACGGTAAGGATTGCTCGAACGACCCTTTTTATTCCAATCTATATATATATATATATATATATATATATATATATATATATATATATATATATATATATATAATTGATTGGAAAAATAAAATAAAGAATATAAGGCAATCACATGACCCTTC
CmoSSR00334	p5	(GAGAA)4	Cmo_Chr01	2656043..2657068	TAAAATCCGGGTTTGTTTCG	59.8	CCTTCACCTCCAAGCCATAA	60.07	TAAAATCCGGGTTTGTTTCGTTATTGAACGAATACGAGTTCGAAGAGAGTTAGACTAAAAAAACGGACCAAAGATTCAAACTTTGAATGTTGTAAGAGGAGAAGAGAAGAGAAGAGAAGAGAGAAGCTTACATATTGGGAGGGAGAGTGTGGAGGATGAGGGTGAGCCATGAGGGTTAGTTGATATCAGAGTTGGAGGAGGAGGAGATCATGGGGATAATGAGGGGTTAAAAGCAAAGAGGATGGAAGATTATGGCTTGGAGGTGAAGG
CmoSSR00335	p3	(TTC)7	Cmo_Chr01	2675003..2676029	TGCCTTTTTCTTTTCATCCG	60.18	CTAGGATGTCCTGCAATGCC	60.62	TGCCTTTTTCTTTTCATCCGATGCAAGATTATAGAATATTATTTAGCCTTGAAATAGAATTAGAGTACTAGCCTTAAAATAGAAGTAAATCATCCAATCCTCTTCTTTTAAGTCAACAGGACTTTTTATTACAGCTAAGGCAGTACAAGAGTTTCTTCTTCTTCTTCTTCTTCTTACCTTTTATTTTATTTTAAATAATGCAGATAGGATCAGTTGATGAGGAGTCTTCAAAATCAGATGAAGAGTATGATGATCTGGCATTGCAGGACATCCTAG
CmoSSR00336	p2	(GA)9	Cmo_Chr01	2678624..2679647	GCTGCACGAACTAGACGACA	60.21	GAGAGTCGTAACCTCGTCCG	59.87	GCTGCACGAACTAGACGACAACTTTGAAATAGATTGGATACGGATAGTAACTGCCATTGTGATCGGCCAATAGCACAATACGGGGAGAGAGAGAGAGAGAGAGCTTGAGGGAGTCAGAAGTAACGACAAACCGGACGAGGTTACGACTCTC
CmoSSR00337	p2	(TA)9	Cmo_Chr01	2683129..2684152	CCCATGTCTTGTCTTGTTGG	58.98	TCTCACTTTCACTGCATCGG	59.98	CCCATGTCTTGTCTTGTTGGTTTCACCAATATATGTAACTATATATATATATATATAATCATACACCTTACCTAACACACCTTGTTTTTTTGTGCTTTTATTTAGAAATATTTTTGCATTCTTTCTATATTTGCTATAAAATTTATCATTTCGATGTAATTTGTGATCCAAACGATGACGACTAGATTGTCTGGTGTGACATTATAACGACCGATGCAGTGAAAGTGAGA
CmoSSR00338	p2	(AT)10	Cmo_Chr01	2683586..2684611	TCCAAGATGAAAGCCCAACT	59.67	CATGCATCAAAACCGTTGAC	59.97	TCCAAGATGAAAGCCCAACTTTAAAAAATAATATATATATATATATATATTAAAAATATTAAAAATGACGTAATAAATAAGGTAATTATATGGTGGAAAATTTAAATTTTGGAGATTATAGTAATTAATAATTATGCGGTTAACTAATAATTCCAAGGGAAATAAAGTGTCGGCAGGTCAACGTGGTCAACGGTTTTGATGCATG
CmoSSR00339	p3	(TTA)7	Cmo_Chr01	2683806..2684832	TCAACGGTTTTGATGCATGT	59.97	AGAAACAGACAGCCAGCGAT	60.02	TCAACGGTTTTGATGCATGTTATTATAAAAATAATAAATAATAATAATAATATTCAAAGACTTTTTATTATTATTATTATTATTATTTATTATTATTTATTATTATTTTCTAAGATGCTGAAATTCAGTCATTGGTTAATAAATGCATTCAACGAAATCGCTGGCTGTCTGTTTCT
CmoSSR00340	c*	(AATAGTA)3(GTAAATAG)3*	Cmo_Chr01	2697129..2698176	CAAGCTTACGTCCAATTATTCA	57.07	GAAGCTTCATGTTTATGCCCA	60.09	CAAGCTTACGTCCAATTATTCAAATTTAGCACTAAACCGAATCAAACTAAAAGTTTAATAATGAAATTTATTCATCAAATTAAGACAAGAATATATATATATACAAAGGGTAGGTTACCCTATGAATATTATATAAACCCTACAATAGTAAATAGTAAATAGTAAATAGGTAAATAGGTAAATAGAAGAAAGAAGTAAAAATTGAAGTATTTTGGTTTCTAGAAATGGGCATTTTAACATAAATAGAAACTGGGCATAAACATGAAGCTTC
CmoSSR00341	p2	(AT)25	Cmo_Chr01	2710680..2711735	AAGCAATGAGTGCAAGTTCC	57.95	GAGGGGTATGCATGTTGGAC	60.2	AAGCAATGAGTGCAAGTTCCATAAGGTAAGCCCACTAATATAGCCTAGAATGATGAAAAGCTGCAAACTGTTCAAAAGTAGATAATTACAGCCGTAAATACAAGATGATTGTTACATATATATATATATATATATATATATATATATATATATATATATATATATACTGCTAGCCAAATCTCCAATAATCACCCCTTTTATCACTTACTAGTATCAGTCCAACATGCATACCCCTC
CmoSSR00342	p6	(AATAAA)5	Cmo_Chr01	2714563..2715598	GAAGGTTGGTAATCTGGCGA	60.07	ACCTAGTACGGTTGCGGATG	60.02	GAAGGTTGGTAATCTGGCGACTGCTAAGCCTAAGGAACGTTGTCTGAAGTTTTAAGTCAAGGAAATGATAATATTAGACCATGATAAAACAATACAAGAAGAATATTTAGTGTAATAAAAATAAAAATAAAAATAAAAATAAAAACAAAATACATACCTGTTCCTTTTCTGAACTTGTCAAAGGTTTCTCATCCGCAACCGTACTAGGT
CmoSSR00343	p6	(CTGCAT)4	Cmo_Chr01	2725833..2726862	CAAAGGGCTAAATTGGTCGAT	60.32	GCAAGGCATGTCAAGACTCA	59.99	CAAAGGGCTAAATTGGTCGATACTCGCTTTATATCATGGATAAAATATATATTAATACCATTGTCCTGCATCTGCATCTGCATCTGCATCTTTTAAAAGGGTTCATTCAATCTTCTTTTCTACTTAGTTTTCCTTTTCTTCTGCGTGTATTGTAAGTGTTGAATAATTACTTCTTATGAAGAACGATCTTGATTTACTTTCTGCTGAGTCTTGACATGCCTTGC
CmoSSR00344	p7	(ATAAAAA)3	Cmo_Chr01	2727911..2728937	TCCAAAAGGAACTAACGAAACA	58.79	CTCGGGAAATTCTTATAAAGTGGA	59.87	TCCAAAAGGAACTAACGAAACATATAAATTACGCAAAATTAAAAGAAAATTTACTCGACTAATTTACAGAAATAAGTAATCCATAAAAAATAAAAAATAAAAATAATTACCATAATAATAATTTGAAGAACATATTTGAAGAACAAAGATTCACTTTTAGCATTTTTATATGTTGCAAAAAGAAAAGGAATCAATAATAATAATTATTATTATTTGTTTTTTTATGATTTTTTTACATAATTTATTTTGCCTTTTCTCTGACATATACTTTTTTTCCACTTTATAAGAATTTCCCGAG
CmoSSR00345	p2	(TC)9	Cmo_Chr01	2730224..2731247	GGGGTTTTGTTTGTTTGGTT	58.69	TCTCGGCTATTCAGTGACCC	60.22	GGGGTTTTGTTTGTTTGGTTAGTGAGAAAATGAGAGAAAATGAAAGAAAAAAGAGACCTAATGAAGTGTGTTTTATGTTGTTTGTGTATATTAATGTTTTATGTCCATTTTTATTATTTTTATTTTGGAGGGAAATTTAAAAATCCAAAATTTATTTTATTTTATATTTTTTGTAAATTATGCAAATTAAAATAAAATAATTTTCTCTCTCTCTCTCTCTCTAGGAATAGGTTTGAAAAGTAGGTGGAGAAGAGAGAGAGCATGATTGGGTCACTGAATAGCCGAGA
CmoSSR00346	p5	(AAAAC)4	Cmo_Chr01	2734177..2735202	AATTACCAAATTGCCCCTCC	60.02	CTTGAGGCTGTTGGAGGAAG	59.98	AATTACCAAATTGCCCCTCCGTCTTAAACTTCCTATAATTAATACAAAAAAAACAAAACAAAACAAAACCTTCTAGCCTTGAGATGTTTCCCTAACTCTTTTTAAGCTCCAACTTCCATTGCTCATCCAAAATCCTCTGAACCTCACTTGGCTTACATGGAATTGCCAATGCACCTTCATGATCAAACCCATACTCCTCAGCTGCTTCCTCCAACAGCCTCAAG
CmoSSR00347	p2	(TA)11	Cmo_Chr01	2734613..2735640	CCCATTGATCGATTTTCGAC	60.27	TACCACTTTGAATGCATGGG	59.4	CCCATTGATCGATTTTCGACTTCGTGATAGCCTTCTTTGCAGCTTCTCGACGACCGCTCTGATACCAATCTTCCTCTTCATGGTTCTAAACATAGCCATATGGGATAGAAATATCTAAACTTGAGTGTATATATATATATATATATATAGTGATAATGAGGAATGAGAAATAGATTTGAAAGGGTTAAAATGGTAAAAACACGAGAGAAAAAAGGACAAGACTTTGGAGGAGGAGACCATAGCATGTGAGTAATTGAATCCCATGCATTCAAAGTGGTA
CmoSSR00348	c*	(CTTTTTT)4(TTTTTTCT)4*	Cmo_Chr01	2744126..2745178	AGTTTGGCGCTATGCTTGAT	59.87	CCCAGGCTAGAACGACGATA	60.23	AGTTTGGCGCTATGCTTGATTTGCTTTTTTCTTTTTTCTTTTTTCTTTTTTTCTTTTTTTCTTTTTTTCTTTTTTCTTTATCTCTTTTTCTTTTTTATTTTTTTTTTTATTATTTATTACAAATACTTCCATTTTCTATCCGGACATAATGATTTGATTGATTTTAATTAAAGTAAGGTGCAAAAGTCCATTATTCATTCCATTTTTTCCTTTTCTTTTCATTTTATTTTTGAATTATTTCATTTTTTTTCGTGGTCGTATAACGAACATAATTAATATCGTCGTTCTAGCCTGGG
CmoSSR00349	p5	(TTATT)4	Cmo_Chr01	2745056..2746081	AAACTGGCCAAACAACCAAG	60.01	TTGATCGGAATCTCTCCCAC	60.01	AAACTGGCCAAACAACCAAGCAACCCCATTTGGGCCCACTCAATCATTCCCAACAGAATTTCACACAAAAAAAAACATTATTTTATTTTATTTTATTCACGAGATTCGTTCGAACCCGGGTGGGAGAGATTCCGATCAA
CmoSSR00350	p2	(AT)22	Cmo_Chr01	2757760..2758809	CCACCAAAAATCTTGGCAAT	59.8	GGCCCACTTTATCGTGTTTT	58.95	CCACCAAAAATCTTGGCAATAATAATAATATATATATATATATATATATATATATATATATATATATATATTATTTCAGCTGCAGCAGATACCTTACTTAAAGCCCTTAATTTCATTTATAAAACACGATAAAGTGGGCC
CmoSSR00351	p2	(TA)21	Cmo_Chr01	2780558..2781605	GGGCTTTCTATTTGCTTCCC	60.04	GCTTGGTGGTGGTGATACAA	59.42	GGGCTTTCTATTTGCTTCCCCGCAACCCCATTTGTGTTCATCTTTTTCTTCTAAAATTAGCCTCTACAAACCACATTAGTGATCATCACTTCATAACTTAGTTATTCTGTCATGTATATATATATATATATATATATATATATATATATATATATATGAATCAAACATGAACATCAAACAAAACACAATTGATTCAACACATCTCTAATTCATTCTCCACTAATCTTCTTGAAAAATGATTGTATCACCACCACCAAGC
CmoSSR00352	p4	(TTAT)6	Cmo_Chr01	2784275..2785304	TGCCTCTTTGGCTCTTCCTA	60.09	AAACCAACCAAATGGAAATGAC	59.97	TGCCTCTTTGGCTCTTCCTACCCCTGTCTGTTATTTATTTATTTATTTATTTATCATTATTTAAAATTTTGACATTTTGTGCTCTATTCCTTTTTCCTTCACAATAATTCAAACTTTATTAAATTAACGTTTATTGGCTTTATTCAATCAATACAATAATATGATTCCTTCATAATTTAATTTTTTTCCTTTTTAAAAAATAATTAGTCATTTCCATTTGGTTGGTTT
CmoSSR00353	p3	(AAT)7	Cmo_Chr01	2785722..2786748	GCCTGAAGAAAAGTCAACGC	60	GGCCGATTCTATGGCAAGTA	60.06	GCCTGAAGAAAAGTCAACGCCGCCACCCCAATTGAAAATCCATTAAAAAAAAAAAACCCAATAATAATAATAATAATAATAAAGACTTGATCTTTTTAAAATTGCCTTACTTGCCATAGAATCGGCC
CmoSSR00354	p2	(GA)25	Cmo_Chr01	2791813..2792868	TCATTTCCAACTGATGTGGG	59.34	ATGACGTGGCTCTTCTGGAT	59.69	TCATTTCCAACTGATGTGGGATCTCACACTCTTATTCGAATATAGTATTGTTTCATTCATGTATCTCTCTTTTACACCGAACACAGAAGCTTTTTCATTTAAATTTATGAGATAAAAAGATCATTCTTTTAACCACATAAGTGTCAAATTTAGATAAAATAAGAGATAGAAAGAGAGAGAATCTCCATATTGGCAAGGAGAGAGAGAGAGAGAGAGAGAGAGAGAGAGAGAGAGAGAGAGAGAGAGAGTTTGGCTGCTTTGTCTTTTAACAATTCAAGTTATCCAGAAGAGCCACGTCAT
CmoSSR00355	p4	(ATTT)5	Cmo_Chr01	2802368..2803393	CGGAAAATTGTCAGAACCGT	59.97	GATCTTAGTGGGCCGAGACA	60.22	CGGAAAATTGTCAGAACCGTCAACGGTGTGCCGGAGACCGTTGATATGTTTTACCATAGACATCTCACTCCGGTCGAGGTACGTACACGTGGATTTTTTTAATAATTATTTTAGAATATAATTTATTTATTTATTTATTTATTAATATTTTAGATAATCAAACTGATTATATTTAATAATTTTGTTTAATGTACGTAATTTAAGGATAGTTTTGTTGCATGTGGAGTGTTATTATTAGTGATGGGCCGAATGTCTCGGCCCACTAAGATC
CmoSSR00356	p2	(TC)12	Cmo_Chr01	2827083..2828112	TCATCTCCTTCCTTCACTTCG	59.41	GAGACCGGAGGATGATTGAA	60.01	TCATCTCCTTCCTTCACTTCGTCTCTATTTATATTCTTCGTTCTGCTTCACAACTAACTCCATCTCTCTCTCTCTCTCTCTCTCTCCCTACTGAAGTCTGAAATGGAGTGCAGTGACGCAAAATCCGGTCCAACTTCAATCATCCTCCGGTCTC
CmoSSR00357	p3	(ATT)7	Cmo_Chr01	2829291..2830317	AAGGTCGTTAGTGAGCCAAAA	58.89	TGACGTGTCACATCCATCTGT	60.02	AAGGTCGTTAGTGAGCCAAAATTAGGCTCTTTTTTCGCTTTAATAATTACTGCCTCTTCTTTTCCATAAAAAGCTACGCTATTTAATTATTATTATTATTATTATTTATTAAAGAAGAAGAAAAAGAAGTGATGACGTACATGTGGGCCCCAGGCTTTATACAAACTGTCTGCTTGAACTTTAGATTAATGACAGATGGATGTGACACGTCA
CmoSSR00358	p6	(TTTTAT)4	Cmo_Chr01	2833241..2834270	CCCCACCGACATCTTTAAT	57.32	GGTTACTCTAGGTTAGGGTTTAGGAA	58.75	CCCCACCGACATCTTTAATTAATATTCTTAGTTAGTTTTTTTTTTTTTTTAAGTCTTTGGTAAATTTACATGGTTTTATTTTTATTTTTATTTTTATTTTTTTACTAATTAAATTAGGTGGAAGTTTTTTTTTTTAAAATATATTTATTATTTTCCATAAAAAATTTAAACAAAATACTAAAATACAACAAAATCACTATAAATATTTGAGGTCTAAAACTAGCTAGAAATAAAATAAAATTTACTATAACCATTAAAATGAATATAAAAAAAATTCCTAAACCCTAACCTAGAGTAACC
CmoSSR00359	p2	(TG)13	Cmo_Chr01	2834104..2835135	CGGCTTTCAATTCTTCATCC	59.65	AATCCCTAACGATGGTGTGC	59.82	CGGCTTTCAATTCTTCATCCAGTTCGTAGAAATCTAATTTTCCTTTAGGTAAATTTGTAATCTGTTTCTATGCCATCTGTTCAATTGTGTGTGTGTGTGTGTGTGTGTGTGTTTTGTTGATTAATTATGCTTGATTTTATATGGGAATCTGATTTTGTTTTGTGTTTGTTGTCATTTTTGGTTGTTTTGATGAGAATAATCGCAGCTCGGAGGGCCATGTGTTGGTGGTTTGTGTTGAGTTGCTGATAAAATCATCGTTTTGGCACACCATCGTTAGGGATT
CmoSSR00360	p3	(AAT)11	Cmo_Chr01	2861835..2862873	CTCCACGCTTTCCCATTTTA	60.07	TGTTTACAGCGTCCTCACCA	60.3	CTCCACGCTTTCCCATTTTAAATCATTAATTTTTTTTTAATTATCTAGAATAAAACTTAGAATCAATATGGGTTTTTATTCATTTATTTAATGTACACATGTTTTGCCTTTTCATTTACCTAATAACATATTATTTAAAATATTTACTCAATATATATTTATATAATTTAATTTTTTAAAATAATAGGAATTAATAGGGAGGAGAAAATAATAATAATAATAATAATAATAATAATAATAAGAGAGATAGAGAAGACCTTGGCCTTTCCCAAAGCCATGGTGAGGACGCTGTAAACA
CmoSSR00361	p6	(CAAAAT)4	Cmo_Chr01	2862578..2863607	GCATCGAATAATGCCGTTTT	59.93	GATCTCGGAGGAACGTTTGA	60.2	GCATCGAATAATGCCGTTTTCCTCTTCCGCTTCAGCCACTGCGCCAAAATCAAAATCAAAATCAAAATCAAACCGAATCAAATTTCAAATCAAACGTTCCTCCGAGATC
CmoSSR00362	p8	(TTTCTCCT)3	Cmo_Chr01	2862645..2863674	GCATCGAATAATGCCGTTTT	59.93	TGCCGTCTGCTTCATCTTTA	59.57	GCATCGAATAATGCCGTTTTCCTCTTCCGCTTCAGCCACTGCGCCAAAATCAAAATCAAAATCAAAATCAAACCGAATCAAATTTCAAATCAAACGTTCCTCCGAGATCGATTTCTCCTTTTCTCCTTTTCTCCTCTCAAGTTCGATTGAAAATTAGGTTTACACTTACATTGGAGAGGAGATGAATCAAATGCTCGAGGAACAGAGAGAGAGAGATAAAGATGAAGCAGACGGCA
CmoSSR00363	p2	(AT)9	Cmo_Chr01	2863970..2864993	AGAAAAAGTAAAACATGTCGGG	57.38	TTCATTTCTCTAGCTCGGGG	59.41	AGAAAAAGTAAAACATGTCGGGTAGAAATTTTATCATCTTACCTTTATAGTATTCATCGATAAATTGATTTAAAGAGTCAATTATTTCAACATTGAAGTTCCTAACTTCGAACAAGTCAATCTAAGTGTTATGGATAAGGTTATAGATAAGAGACTAAGTAAAAAATATATATATATATATATAGATTTTGCCCCGAGCTAGAGAAATGAA
CmoSSR00364	p5	(TATTT)5	Cmo_Chr01	2873176..2874206	CAAAGGAGACGGTTTTGGAA	60.08	GCCCACATGGAGACAACTTT	59.97	CAAAGGAGACGGTTTTGGAAAGTGTAGGCAGCCAAAGTATGTTGTATTTTATTTTATTTTATTTTATTTTTTTCTCTTTTCAATAACATCATACCCACCTGCCCAAATCTTGGAAAAGTTGTCTCCATGTGGGC
CmoSSR00365	p3	(ATT)8	Cmo_Chr01	2882207..2883236	TTCAAACCGAGGAAAAGTGG	60.08	AAATTTGCACACACAAAGTGC	58.74	TTCAAACCGAGGAAAAGTGGCTAAGCTTACATTTGAAAAACATGTAAAACTTCACTATTTATCTTGATTAGTTCATAAAGATATAAAACTTCAAAAAATAAAGATTAATATTATTTTTTTTGGATCAAATTAGATTATTATTATTATTATTATTATTTTTAGAAAATTAAAAGAAAAAACATGTGAATTATAGTTAATAATGTGCACTTTGTGTGTGCAAATTT
CmoSSR00366	p8	(AAAAATTA)3	Cmo_Chr01	2890739..2891768	TGTCTACAGGCTTGCATTGG	59.86	TTCGTTCCCTTCAAGTCTTTTT	59.28	TGTCTACAGGCTTGCATTGGATCGAAAAGTTGTAGCGTTCAAGTGTCGATTAAAGCGTTCGGCGATCCTTGTAGAGGAAAAACAAAGAGCTTGGCTGTGGAAGCCTCTTGTGAATAACAAGGTACGTACTATGATTACTACCGATCATCCTTGGGTATTCCTTGTGTAACTAAAGGAAGAGAGGAAACTAAAAATTAAAAAATTAAAAAATTAAAAAAAAATTGAGAAAAAAAGACTTGAAGGGAACGAA
CmoSSR00367	p3	(AAT)8	Cmo_Chr01	2892873..2893902	CTTCCTACCACATCCCGAAA	59.93	TCCTTTTTCGACCTTCCTTTT	59.23	CTTCCTACCACATCCCGAAATGACTTAACTAAATATCGAGTCTTTTTAGTCAAACACGTTTCTCAATTATCAAATTTCATTTTTTTTTTCTTTTCTTTTTTTGCTTTTTTTCTTTTTACGTTTGTAAATGAATCTTCATATTTATTTTGTTTAGAACATAAAATAATAATAATAATAATAATAATAAAAAGATGAAGAATATGATTTTTCTTGTCAGAAAAAATAAAAAAAAGGAAGGTCGAAAAAGGA
CmoSSR00368	p2	(AT)14	Cmo_Chr01	2899261..2900294	TCCCGACCTCGAATTAGTTAAG	59.63	AAACTCCAATTTCATCCCTCAA	59.81	TCCCGACCTCGAATTAGTTAAGTTATGTTCATATTTGTAAATATTTATTTAAAATTTTATAAAAATATAATATTTTAGATAAAACGTAAATTTACCCGTATTTAAAAAAAGTGAGATTTAAATTCTTGTTTATTTTTTCTATGGAAACTATTTTTTATTGCTATCAAAAATATTATTTAATAATTGAATAATTATAACTATTCAAATTTAAAATTTTTATTTTAATATATATATATATATATATATATATATTTAAAACATGAATTAATTGAGGGATGAAATTGGAGTTT
CmoSSR00369	p7	(TAAATTT)4	Cmo_Chr01	2899678..2900711	AAGCCACCTCTCTCTCCCTC	59.95	AGCAATTGAACAATCCCAAA	58.07	AAGCCACCTCTCTCTCCCTCCTAAAAGGGGAAAAAGCCTTATAAAAAAAGGCTCAAGCTTGAAAATTTACAATTTTGCCCTTTTCCATCCTTAATTAAATTAAAACCCTAATTTTTTTAAAAAATATGATTCTTAAAAGTAATTTCTTTTATTAAATGGTATCTCTCACCAACTAAATAGTCTCTAATGTAAATAGAAAAGTATAAATTTTAAATTTTAAATTTTAAATTTTGAAATTTGGGATTGTTCAATTGCT
CmoSSR00370	p2	(TA)11	Cmo_Chr01	2906612..2907639	CCGACATCATTTTTCTCGGA	60.97	TGGGGACGATTAGGTCAAAC	59.79	CCGACATCATTTTTCTCGGATGAACATTAACTGATTTTTTTTTTATTATTGAAAAAAAATAAAGAATATACAAGAACATGTATGTATGTATATATATATATATATATATAACAATCCGACCAACCAAAACAAACACAATGAGTTACAAGAACAAGTTCCAATCTAAAAGAGTGATTTCAAGCTGATAAATACAAAAAACAACACCCACAAGCACGAGTTTGACCTAATCGTCCCCA
CmoSSR00371	p4	(TCAA)5	Cmo_Chr01	2912812..2913837	CGGATTCATGCCCTTATTTC	59.37	AGCCTTACGGCAAATTGAGA	59.85	CGGATTCATGCCCTTATTTCCATAAATTCAAAATACCATTAGCTATTGAACTAATTGAGGGAGAGAATTTCAATTTTTTAAAAAATAAAAATAAATTATCGTCTTCTCCCAACTATAATCTACAAATATACAAATATAATTAAGGTTGAATTTGTCAGGTCAATCAATCAATCAATCAAGCTAAAAACTAAAAGAGAATTGGATTATTAATTCATGTTCGAATCAGAACAGTTGAACACACACCAGGTCTCAATTTGCCGTAAGGCT
CmoSSR00372	p3	(TTG)9	Cmo_Chr01	2918224..2919256	CAGCAAGGAGTGGTAGGACC	59.72	TGTTTTTCCTCGAATGGGAC	59.91	CAGCAAGGAGTGGTAGGACCCTTCTTTTGTTGTTGTTGTTGTTGTTGTTGTTGTTTTGTGTGGTAATTCTTATATGTATAATCTCTTTAATCTGAATATTGTACTCACTACTCACAAATCTTTCCTTGTCTATAAGGTCCCATTCGAGGAAAAACA
CmoSSR00373	p5	(AAAAT)4	Cmo_Chr01	2924805..2925830	CATCGTGAATGTCTCCTCCA	59.63	TCTGAACTTTTTGTAGGCTATTCTC	57.51	CATCGTGAATGTCTCCTCCAATAAGAGGAGAGAAACAAGATAAAAATATATGGACACAAAAAAGATAGAGACAGATGGACAAAAATAAAATAAAATAAAATAATATAATATAAAAATTTGAGAAAGACAATAAATTAAAAGATAGAGAAAAAAAGAAAAAAGAAAGGGACAAAATATTTATTTAGACAGAAAAAAAGTTTAGAGAATAGCCTACAAAAAGTTCAGA
CmoSSR00374	p3	(GAA)9	Cmo_Chr01	2944689..2945721	AAGGCCATTGATCTCCACAG	60.07	AGACGCGCAAAGTAAAATGG	60.26	AAGGCCATTGATCTCCACAGCCGTGCAATCGTTTTCCATGGTTCTTGGCCGTGGAAGCGAGTAAGAGAAGCAGACGATCTAGGGAAGAAGAAGAAGAAGAAGAAGAAGAAAGAGCGCCACCATCTCATCTGCCATTTTACTTTGCGCGTCT
CmoSSR00375	p5	(AAATA)4	Cmo_Chr01	2950490..2951515	CACGTAAGCAGCAAAGGTGA	60.05	TTCGTTGAATTTTACTCGTGC	57.97	CACGTAAGCAGCAAAGGTGAACTATTGAACATGTACTCCCATTATTTGTTTAACATACTCAAACGTCAAATAAATAAAATAAAATAAAATAAGGGGTAAGAAAGGAATTTCACTTTAGCACGAGTAAAATTCAACGAA
CmoSSR00376	p2	(TA)9	Cmo_Chr01	2955190..2956213	CCACGAGATATGTGCTATAATTGTG	59.83	TCTCCTTTCTCGACTTAAATCTTCA	59.91	CCACGAGATATGTGCTATAATTGTGTTCCTTTCAAATTTTTTCTATATATATATATATATAGTTTCTATTTTTAATACAATTTGTAGTAATTTTTTTTATATAATTTTATAAAAAAAAATGTTATATTTATAAAAGTGAAGATTTAAGTCGAGAAAGGAGA
CmoSSR00377	p2	(TA)20	Cmo_Chr01	2984306..2985351	GGGTAACACGTCATCTCGCT	60.14	AGATTCCCACTTTGATGGGG	61.08	GGGTAACACGTCATCTCGCTCATAATATTATTGTTAAAGAATAATCATAATTAACAAAGGACACAAACCATATGATTGATTAAGATATGAGTTTTTCTTATAAAGGGACAACACAAAATTGACTACTTTGTATTAAAATAATTAAATGTTGGAATTTCTTCATCTTTTTATATATATATATATATATATATATATATATATATATATACACTGCCCCCATCAAAGTGGGAATCT
CmoSSR00378	p7	(CGGGTGT)3	Cmo_Chr01	3001880..3002906	GGCCTTCAATGCAAAATCAT	59.91	TGAGTTGAAATTGGGCCTTT	59.55	GGCCTTCAATGCAAAATCATTGAGTGTATATACTCAAATTTATATGGTAGGGTAAGTTAAAAAGAGAGGTACATCAACCAACGAATTCAGATTATTTTTTAATAAAAGCCAATTACGATAATATGATAATTAAAAAAGATTTTAAAATAATTGAAAGTTACTGCCTATATTCAATAAGCCGGGTGTCGGGTGTCGGGTGTGTGCAGCGGGAGTGTGCGGGGGGCACGGTCGGGGGCGTCCTTATCGAAAGAAACCCAGCCCAAAAAAGGCCCAATTTCAACTCA
CmoSSR00379	p5	(CTGTT)4	Cmo_Chr01	3013358..3014383	ATGCATTCCCCCAATTTACA	60.02	AGCATTGGAGTGAACAAGGG	60.11	ATGCATTCCCCCAATTTACAACTCAAGAAGAACTCACGTCTTTTCGTGACCCGTGACCACCACCTCCTGTTCTGTTCTGTTCTGTTCTATTCTTCTCTTACTCCAAAACAAGACCCATAATCCAACAAAACTTGTGCCAATTTCGTGATTAATACCTCTTTTCATCACCCCTTGTTCACTCCAATGCT
CmoSSR00380	p3	(GAT)7	Cmo_Chr01	3020100..3021126	GGTGATGCGGGAAGTTAAGA	60.07	AGGATGCACACGAGGATACC	59.96	GGTGATGCGGGAAGTTAAGAAACATGAGGTAATTAACAAGAAGAATCCACGAAAATTGAGAACTTGATGGTCAAATTCAAGGGCTTACCAGCTGATTTCTAGTCGATTGACCAGGAGTCTAGACGTACGATGATGATGATGATGATGATCCGAGATAGAACAACGACAAGGATGCTCCTCAAAATGGGACGATGATGTTCACTTGTGTTGTATGCGGCCTTTAGGGCTGAAATCAAAGCATGAGAATGGTTTAGTGGGGGTATCCTCGTGTGCATCCT
CmoSSR00381	p4	(AATA)5	Cmo_Chr01	3021084..3022109	GTGCAAAAACTTCTTCCCCA	60.09	GGGGATTTTGCTTTTGCTTT	60.42	GTGCAAAAACTTCTTCCCCAGTAGATATGTTTTAAAATATTAAAAAAAAAAGAATACTATTTTTGGAAAGGCAAATGGGTGGGATTAACAAATTAATGAGAGAAGGCCATGTGATGCCAAATTCCACTAACACCTTATTATAATATATAATCCATTTAAGCTGTCAGCCAAATCAACAATAAATAAATAAATAAATAATTTAATTTTGGATATTAATGGTGTGGTCCTATAAATTCTTGGTAAAGCAAAAGCAAAATCCCC
CmoSSR00382	p3	(CTC)7	Cmo_Chr01	3023502..3024528	GCTTTGTTGGTTTGTTCGGT	60.02	TAGTTAACCCACCGGAGACG	59.99	GCTTTGTTGGTTTGTTCGGTGATCGCCGGTGGGATTTCATCGCCAAAGTATCAGGTTTGAAGGTGGCGGGAGAGTACAAATTATAGGTAGGGTTTATTAAAACCCCCCCTTCTCCTCCTCCTCCTCCTCCTCCACCTCCTTTTAACCTACCCCTTTCTCCTCCCTTACAGGCCTGAAAAGAAATGGTAAAAGCTGCCGTCTCCGGTGGGTTAACTA
CmoSSR00383	p6	(TAATTT)4	Cmo_Chr01	3033316..3034345	GGTTCATGAGCACCCCTAAA	59.93	ATGAAACCTCCATCCGACAG	59.93	GGTTCATGAGCACCCCTAAATTAATAAAGATTATTTTGGGAGTTTAATATGAACAGTGGAAAGTGCGGAAACGGCTTGTCGGGAATAAATATATAATATTCGATTTAATAATTTTAATTTTAATTTTAATTTTGGGGTAAATAATAGAATTTGTTTTTGTCGCTGTCGGATGGAGGTTTCAT
CmoSSR00384	p3	(CCA)9	Cmo_Chr01	3065456..3066488	ATATGGCATTGCAGTAGGGG	59.81	TCACATGGGGATGCATTAAA	59.75	ATATGGCATTGCAGTAGGGGTTGGGTTATTAGGTAGGTAGTTCCATTGTTAAATTAATATAATTGTTCCACTACCATGAATATATGAATATGAATATGATTATGATGATGTCAAATCTTACCAGCCTTTTGCTTCTGTAAACCAAAAACAATGACACTTGCCCCACCACCACCACCACCACCACCACCACCCCCACCACCACTTCTCTATGTAGTTTAATGCATCCCCATGTGA
CmoSSR00385	p5	(GATTC)5	Cmo_Chr01	3078055..3079085	GGTTGAAGCGTCTTGGACTT	59.33	TCCATCCTTTTCGATTCTCG	60.15	GGTTGAAGCGTCTTGGACTTTTCATGTAACGGTTGAACTTGACCAAATTAACGACCTCTTCAATATTCATTGATTGATCATCTTTTCTCTATTTGGGGTGATACTCAATCCAATTATCAATAAAAGGACAAAACTCGTTGTTCAATTTTGGATTTTTGGAGGTTATAATGGCTCGATTGTCTCTAAATTCAAACTAATATGTCTAAGTTTGTGATAGAAACATACGAAACCAATAGATCAACTTGATTCGATTCGATTCGATTCGATTCTCCAGCATTTCGAGAATCGAAAAGGATGGA
CmoSSR00386	p5	(AAATT)5	Cmo_Chr01	3102210..3103240	TCGCGAGAGAGAACGAGATT	60.24	TGGATTGAGAGTAAATGCCG	58.72	TCGCGAGAGAGAACGAGATTGAATCGGAGTTAGGGCTATCCAAGATTTAGGAATCAATATCTTTATTTCTATCCTTTTCTTTTCCTTTTTTATAAGGATCGGGCTGTATAAGTCGGTAAAATTGTTGGGCTAGTGGGCTTCTGGTGGCTGGGCTTTAAAATTAAATTAAATTAAATTAAATTAATAAATAAAACAAATAAAGCTATTTTAATTCGAAATTTACATATGCCATCTTTTTTCTTTTCTTTTTTATTTTATTGATCTACAATCCCTTTACTATCGGCATTTACTCTCAATCCA
CmoSSR00387	p3	(TTA)8	Cmo_Chr01	3103849..3104878	TGTCCCGAATAATCATGCCT	60.3	AATCCTCTGGGTTCGGAGTT	59.93	TGTCCCGAATAATCATGCCTAATATTTAGTTAAATTAGTCTTTTAAATCTTAACAATTTTCTTTTTTAACTAATAATAATAATCGCTCATTTGAATATAATTAAGATTATAGTTCTTTATTATTATTATTATTATTATTATTTAAATAAAAAGAATAATGTAATTACTTCATAAGGTTAGATAATTTATAGAAAGCATGGTGATATAAATACCCTAAAATTATATCGAGCATTCAACTTTAAAGCATGCAGGGAGATGTGATTTTAACCAATTAACTCCGAACCCAGAGGATT
CmoSSR00388	p2	(CT)18	Cmo_Chr01	3115963..3117004	CTCAGGGTTCGGAGGTTACA	60.1	AGCTTCTAAGGTTGCACGGA	60.02	CTCAGGGTTCGGAGGTTACATCAGCTCAACTTAAAAATTGGTGAGCAACCTCTCTCTCTCTCTCTCTCTCTCTCTCTCTCTCTCTTGTGCGTTTCAGCATCTTGGCCTGTGTTTTTATTGATCTTTACTTATGGAGTGAACAGGCTGAACAATAGGAAAGCGAGGCTAGCACGCACGGCTAGGGATATCCGTGCAACCTTAGAAGCT
CmoSSR00389	p3	(TAT)7	Cmo_Chr01	3117172..3118198	GGACCGGGAGCACATATAAA	59.78	GGCAGAAGAAGACACGTTCC	59.85	GGACCGGGAGCACATATAAACCCCAAAACTAGCCAGTAATTTGAAACTATTTAAAGAAAAATTTGTGATATTATTATTATTATTATTATTTTGTCCCTATTGGAACGTGTCTTCTTCTGCC
CmoSSR00390	p4	(AAAG)5	Cmo_Chr01	3151288..3152313	AAATGCAGAGAGGAGAACAAAA	58.12	TTTGTGGCTGTGGGTGTTTA	60	AAATGCAGAGAGGAGAACAAAATAAGAAGGAAAAAAATATTAAAATAAAATAAAAATAATAAAAAGAAAGAAAGAAAGAAAGAAAAACAAGAAGTAAAATATATGGGTGACAGCTCTCCATTCATTGACGTTCTACAAGACCCACTGGCACCAAGTGAACAGGTGAAGTCCCATAGCAAAGATAAAATTTAAACACCCACAGCCACAAA
CmoSSR00391	p2	(AG)9	Cmo_Chr01	3158128..3159151	CATGGAAGAACGGTTGGATT	59.79	CCAAAGAGTCCACATTCCGT	59.97	CATGGAAGAACGGTTGGATTCGGCGAGACCTTCGAGCTCCTCGATTGCGAACGAACGGAAGAGGAAGAGGAAGAGAGAGAGAGAGAGAGTAAAGAAATCGCTCCGTTACGTTATTTATAATTATATAGACGAAAGTTTACGGAATGTGGACTCTTTGG
CmoSSR00392	p8	(ATTTAATA)3	Cmo_Chr01	3160648..3161677	TTTAACCATTTCGCTTTGCG	61.09	TTGTTGGTGGAGATTTCTTTCA	59.59	TTTAACCATTTCGCTTTGCGCCTGTATTTAATAATTTAATAATTTAATAAAGATGTATTTAATAATTTATTTCATATTTACTAATTTAATTAAAACAAAATAAAATTTTAATTTAATTTAAATTAAAACAAAATTATAATTTATTTAAATTTTCAACAAAATAAAATTCAACCCTATGATATTAAAAAAAAAAAAAAAAGATAAAGATGTATTTAATAATTTATTTCATATTTACTGATTTAACTTGAAAGAAATCTCCACCAACAA
CmoSSR00393	p2	(GA)10	Cmo_Chr01	3172644..3173669	CCTCGAAATTGAAGGTGGAA	60.04	CTTCCTCCTCCACTGGACTG	59.83	CCTCGAAATTGAAGGTGGAATCAAAGGTATGGATGGGGGGAAGTTCATGGAAGCTGAAATTGACTCTTGTGGCGACGTGTCTCCGGTGAGGAAGAGTGTGGAGACGGCCATGGCGAGAGAGAGAAGGAAGAGAAGAACCAACGAAGGGGGAGGATGAAATTAGGGTTTTCGCCATGGAAGAGTCAGATTCAGCAAGGAATCCAGAGAGAAATTCAGCTTCGCATGAGAGAGAGAGAGAGAGAGAGGAAATGGTTGATGACGAAAGGGGCTGGCAGTCCAGTGGAGGAGGAAG
CmoSSR00394	p2	(TA)11	Cmo_Chr01	3175758..3176785	GCTTATTTGCTCCTTCGTCG	59.98	TTTTTGTGTGGGCATTCAGA	60.09	GCTTATTTGCTCCTTCGTCGGATTCCACCGTGAGCTCACCGGAGTTCCGCCTATCTCCGCCGTGACTTCCATACTGCCTTATGATCTCAATTGTATTAGGGTTGAAGTTAGAAGAAAAATCGTGTGTAATAGTGGTGTAATTCTGCATGGGTTCTATATATATATATATATATATAGAAAATAAAGGAAGGGTTTTTATTTTTATTTATTGGTTTTTGGTTTAATTGGCCTCTCATTCTGAATGCCCACACAAAAA
CmoSSR00395	p2	(CT)22	Cmo_Chr01	3176637..3177686	TAAAAACACCCACAGCCACA	60	TAAGCCAGCTTTGCATGAGA	59.71	TAAAAACACCCACAGCCACAGCCACACAGCCACACCCACACCCACCTGCTGCTCTATTTTCTGAGCCACTCTCCGCACCACCGAATACGATGCAGATTGGTTCAACTTCCTTTCTTCCTTCTCTCTTTCTTCTTCTGCATGCCATCCTCTCTCTCTCTCTCTCTCTCTCTCTCTCTCTCTCTCTCTCTCTTAACCTCTTCTATTTGGCCATACCCTCTCTCTCTCTCTCTCTCTCATGCAAAGCTGGCTTA
CmoSSR00396	p2	(CT)10	Cmo_Chr01	3176705..3177730	CTTCTTCTGCATGCCATCCT	60.36	CTTCTCCCAACCATTTGAGC	59.67	CTTCTTCTGCATGCCATCCTCTCTCTCTCTCTCTCTCTCTCTCTCTCTCTCTCTCTCTCTCTTAACCTCTTCTATTTGGCCATACCCTCTCTCTCTCTCTCTCTCTCATGCAAAGCTGGCTTATAATTCAAAATTACTACTTCACTTGGGATATTAGTAACCCTTTTCAAGGCTTTAGCTTTCAATCTTATTAATGGGCTCAAATGGTTGGGAGAAG
CmoSSR00397	p3	(CTT)7	Cmo_Chr01	3179652..3180678	CACTTCTTCGGTTCTCTGGC	59.99	GAAGCCATTGGGAGATGAAA	60.01	CACTTCTTCGGTTCTCTGGCTCACAAACAAACACTCAACCGCCCAAACCTCCCTTCATTTCAAATTGAATTATAATATTTTTTGTACTTAGTTTCATTAACATATTTAATTTTTTTAATTTAGGGGTTTTTAATCCCACCCAACTGCTTCGTTTTACACAAATCGTCAGGTCGCTATTTCCCATTAATTTCAAAATTTTCAATCCTCTCTGGGTAGTTGGAGTCTTCCTTCTTCTTCTTCTTCTTCTTCCACTCGAGGGGATGCCAAATTTCATCTCCCAATGGCTTC
CmoSSR00398	p2	(CT)9	Cmo_Chr01	3187178..3188201	TGCCTCTCACCGTTTTCTCT	59.99	GTTGCTACCCACATGCTTCA	59.72	TGCCTCTCACCGTTTTCTCTACATTGTTATTATTATTATTGTTATTGTTGTTGTTGTCTTCAAGACATCCGTACCTGTACCTAAATATTCTCACATTCATCATTTTTATTATGACAATATCATTGTAATTTTGTCCTCTCTCTCTCTCTCTCTTTCATTCATTTACACATGCACACACAGATGTCTTGAAGTGAAAGAAAATGAAGCATGTGGGTAGCAAC
CmoSSR00399	p5	(AGAAA)5	Cmo_Chr01	3190307..3191337	AAATCCATGGAGGGATTGGT	60.39	AAGAAAAGCTTCCACAGCCA	59.99	AAATCCATGGAGGGATTGGTCTTTTAGCTTTTGATAAAGTAAAATTTGAAGGTGGAGAATCGCATGCAGTTGGGGGATACCAGAGGCAAACAGAAAAGAAGAGAAAAGAAAAGAAAAGAAAAGAAAGGAAAAGGGAAAGAAAGATGATGAAGGGGAAGAGGAGAAGATGAGAGAATTAAAGGTAATGGCTGTGGAAGCTTTTCTT
CmoSSR00400	p3	(GAA)12	Cmo_Chr01	3199527..3200568	GTAGCTCCAGCAGAAACGCT	59.79	TCCAGCTCTGCACTCACACT	59.76	GTAGCTCCAGCAGAAACGCTAGGAATGGAAAGTGAGAGACGTCTCCATTACACAGAAAGAGAGAGATGATGATGAGAAACAGAGTTAAAAAGGAAATTTTGGTTTCACGTTTCTGGAGCAGCTGAAGATGTGAGAGCTTTGAAGAAGAAGAAGAAGAAGAAGAAGAAGAAGAAGAAGGGTATGTTTGTTAGTGTGAGTGCAGAGCTGGA
CmoSSR00401	p2	(TA)25	Cmo_Chr01	3202426..3203481	GGTGGTGCCCACAAGTTAGT	59.89	CCCTGTCAACTTTAGACGCC	59.73	GGTGGTGCCCACAAGTTAGTTCTTTCTTTATTATGAAAGGAGGATTTGATAATCTTACTATATATATATATATATATATATATATATATATATATATATATATATATATTTATTTATTTAAAATAAGTTAAAAAAAAGTGTTTTTGTTTTTGAAATTTTGTTAAGAATATGGAAAAATATTAAAAGTGTTATAAATATTTTAGAATAGGAATTTAATAAAAATAAAGAAAAATGGCGGCGTCTAAAGTTGACAGGG
CmoSSR00402	p2	(TA)12	Cmo_Chr01	3222945..3223974	TGAAGGATGATGCGGATGTA	60.03	CGAGTCGTAGGAAGAAACTCA	57.22	TGAAGGATGATGCGGATGTAGCTTGTCGTATTCAATATTCCTCTTATACCCTGCTTCTGCTTTCCGCCAACGGTTACGCACTCTTTTATATATATATATATATATATATAAACCATCTCGGTTAATTGAAAAGATTAATATTTTAAGATTAATTAATTTATGGTTTGAGTTTATAATTTTATAATCGATTAAGTTTCTATTTTGTTGATTACATTTTTTTCACTTAATTCTGAAAATATTATCTTTGGTAAAATGAGTTTCTTCCTACGACTCG
CmoSSR00403	p3	(AAT)7	Cmo_Chr01	3240105..3241131	GATCGATACCATTTGGGCAT	59.61	GACCCGCTCTGTTGACTCTC	59.99	GATCGATACCATTTGGGCATGAACTATTACATTTAAAATAACTATTTTTAGAAAATAATAATAATAATAATAATTTTCTAATTTACTTTTTAGAAAGGCATTAAATGTAGTACGTATTCATTCCTTTATTATTATTATACAAAAAAAAAGGTAAAGTAATTGGTAAAATGTACAGTAAAAAAAAAAGAAAAAGAAAAAGAAAGAGAAAAAGAATTGATTTGAGAGTCAACAGAGCGGGTC
CmoSSR00404	p4	(TAAA)5	Cmo_Chr01	3240411..3241436	CACCTAATTGGTCCTCTTATTTTCA	59.8	TTTGACGGATATTTGGAGGTT	58.43	CACCTAATTGGTCCTCTTATTTTCATTTCAATATTCTACATTTGACTATTTTAATGTCTTTCACAATTCCACTTTTTTTCTTTTAAATAAATAAATAAATAAAAAGTCTTCCAAATTCCTTTTTCTTATATATATTGCATTATCAGAAAATGGTGACATATATTCATAATTTCTTTTTACAATATTTAAATCTTTATAAAATTTAATTTTAATATAATATAAATATATATAAAAAAAAATATCCCCAAGAATAATAAATTTGTTCTTTTATATTATTTAACCTCCAAATATCCGTCAAA
CmoSSR00405	p5	(AAGGC)4	Cmo_Chr01	3258198..3259223	CCCATGAACTGTCCCACTCT	59.96	CGTATGGGTTGGGTTGAGTT	59.71	CCCATGAACTGTCCCACTCTTATTGTCACAACAAGGCCAAAGTCTAGCGTAGAGGTAGAGATTGTGGCTCGACATGGAAACGAGCTCAACGAGCTTGAAGACTCGGATGATAAGGCAAGGCAAGGCAAGGCGAGGGAGGAGCAAAAGGCCTTCTAAATCAATACAAAAACGACCAAGTGTTTAAAAGGTTTGATTTTTTAGAAAAGTCTAATTAGTCTAACTCAACCCAACCCATACG
CmoSSR00406	p8	(TCTGTTCA)3	Cmo_Chr01	3273133..3274162	ATCCTTTGGTTTCTCTGGGC	60.44	CTGGTAGCTCGAGGCATTGT	60.42	ATCCTTTGGTTTCTCTGGGCTTCTTCTTTTATTGTTTCCCAATGTGGTTTGTTGTTCTGTTCATCTGTTCATCTGTTCATCTCTTTTCCTTTACAGGAATTAATTTGTGCTGTGACTTTGTGAGCAGTAGTCACAAAGTTGAAGTGTGTTGATCTCTGTGTACTGTTCATATTTGTGCTATGACTTCTAAAATATGGTGCTTCAGAAGAGGTTAGATTATGGGTTTCATGACTACCAAGTGCCAACAATGCCTCGAGCTACCAG
CmoSSR00407	p2	(AT)11	Cmo_Chr01	3278074..3279101	GGCCAATGATAAAGAAGAAAAAGAC	60.65	CTCCATGCAAATGATAGGGA	58.52	GGCCAATGATAAAGAAGAAAAAGACAATTAAATCAATAATAATACTTTAAATATATATATATATATATATATCTGTGGTTGCTAGAAAAAATATGTGAAATAAATATATTAAATTAATTAAAATATCTTTAAAATTTTTAATTTATCAAAATAATAAAAAAAATCTCACTTTATTTTCAAAATATCTTTAAATTTTTAATAATATTTCAAAAGTATCCTTAAACTTTAAAAAATTTCATTAATATCATCTAATTTTTTAAAAAAATTTAAAAAAGTCCCTATCATTTGCATGGAG
CmoSSR00408	p4	(AATT)5	Cmo_Chr01	3278720..3279745	TCCCATATGCACATAAAATCG	58.38	GTGAGGCCAAAATGTGTTGA	59.55	TCCCATATGCACATAAAATCGTAAAATTGCTATAATAAGAAGTGTCGATTTATTTATTTGGATCATGAGTATAAATTACTCCTTTTTTTTTTATAAAAAATTAATTAATTAATTAATTAAATTATGTGTTATGGTCAACACATTTTGGCCTCAC
CmoSSR00409	p2	(AT)12	Cmo_Chr01	3278905..3279934	TGAAGCGTCATTTTCTTACTCG	59.54	TCAAATAGGAAAGTCGTTGAGC	58.52	TGAAGCGTCATTTTCTTACTCGTTTTTCTACGTGTATAATAAATAAAAAATAAAAACTCGTTTTTCTATGAATATAAAACATATAATAACAAAAATTACTAGATAATACTTTAATATATATATATATATATATATATTTTTAAAAAAAAGTGGAAAATAAGTGGATAAAATTTGAATACAAAAATGTTACCAAATTTAAATTTCATTTATATGGTAAAACTAAATATAATTAATAACTAGTTTTCTTTTAATTTTTAGTGTTATTATAATTTGAGAGCTCAACGACTTTCCTATTTGA
CmoSSR00410	p3	(TCG)7	Cmo_Chr01	3281148..3282174	ACCGAGAAATCTTCGACCCT	60.07	CTTCCTCTTCGTCCATCAGC	59.95	ACCGAGAAATCTTCGACCCTCTTCATCATAATTCGTCGTCGTCGTCGTCGTCGACATCGCCGTCGCTGTCGCCGTCGAGCACGGAGGGTAACTCACCGGATTGTCACGACACCTCTAATACGATGCTGAAGTACATCACGGAGATGCTGATGGACGAAGAGGAAG
CmoSSR00411	p3	(AGG)7	Cmo_Chr01	3284032..3285058	CGAGAGGAAAAGGAACAAAGA	58.56	ACCCCATCGAGAAGAATGTG	59.93	CGAGAGGAAAAGGAACAAAGATTTAGAACAATATAAATAATAGATTAAGAAAAAGAAAACAAAAATCTCATAAGAAATTCAGGAGGAGGAGGAGGAGGAGGGGATCGATCTGCTATAATCGATGTGGGATTGCGTTAAGTTCATCATACTCATCAATGTAATTACAGATTGGATCTAATTGAATCGAAGAAAAATGAAGTCCCACATTCTTCTCGATGGGGT
CmoSSR00412	p2	(AT)12	Cmo_Chr01	3288560..3289589	TAAAGAATTGTTGAGCCGGG	60.07	TTCGATGCTCCTTTTATTCG	57.99	TAAAGAATTGTTGAGCCGGGCCTTACCCTAATTTAGTATATAGCTTTTTTATTCAATTTTACAAATCAAAACCATTTCAAATACAGAATTTCAGAATCCTATAAGAGATTTAATGAAAAGGGATAAAATTCGCAATAAATAAATATATATATATATATATATATATAATATATTAAATTAAATAGACACTGTGTTCGAATAAAAGGAGCATCGAA
CmoSSR00413	p7	(AAAAGAA)3	Cmo_Chr01	3289835..3290861	CACGTGTCAACACCAAAAGC	60.2	GGAGAAAGGAAATGGGAGGA	60.38	CACGTGTCAACACCAAAAGCCCACGTCTTAAAAGAAAAAAGAAAAAAGAAAAAAACTTTCCTTTCTTTTCGTTGTATCAAAAAGCCAATATCACCTTGTCTTTGCATTTGAATATCATGCTCGATCTTACTTCTTTTAGCTATAAACCTTTAATAAACGTGAAAACATCGTTCTTTCCACTCGATACATGAAATTCAACTTATTTATTAAAAACGAGCAGATGCCGTGAATTGCATCTCCTCCCATTTCCTTTCTCC
CmoSSR00414	p3	(CTC)7	Cmo_Chr01	3292212..3293238	AACAAGAAGGGAATGCATGG	59.93	TGAAGGTTTCGCCTGTGTAA	59.32	AACAAGAAGGGAATGCATGGGGCTAAAATTTTTATCTACAAAAAGGGCCTTATAGAGTGTCAGTGTAAAATTTGATGACATTTGTCTTCAAACCAAACCACTCTCCTCACCTTTTCTTCTATAAAATCCCCTTTATTTCATACCCTTTGCTCTCCAAATTACACCTCACAATAATGCTTCCTCTTCTTCTTTTATTTGGTCTCCTCCTCCTCCTCCTCCTCTGCCTCCAATGGCGCCACCCCAACCACCACCTCCTCCCCCCTGGCTCCATGGGCTGGCCTTACACAGGCGAAACCTTCA
CmoSSR00415	p4	(ATAA)9	Cmo_Chr01	3294315..3295356	CACACCCCGAGAAGTTTGAT	59.97	GTAACGACTTGTGAACGCGA	59.91	CACACCCCGAGAAGTTTGATCCTTCAAGATTCGAGGTGCCTCTAAATCATAAATAAATAAATAAATAAATAAATAAATAAATAAATCTGTGGGTCATCCAAACATAACATCAACTCCAAACACCCCATGTCCTTTTCGATGTGTCTAACCTTAAATTATATGTTTTATATAATCACGTGATCTCTTAATCTTCGCGTTCACAAGTCGTTAC
CmoSSR00416	p2	(AT)23	Cmo_Chr01	3306766..3307817	CGTGTATAAGAGTGCAATTTTGAG	58.11	AAACCGGATGATTTAGTGCG	59.96	CGTGTATAAGAGTGCAATTTTGAGTCTATAATAGAACCACCTTTAATTAATAAATAATAATGGGTTAATTAAATAATTAAATCAATTAAATTTTTAATGTCGTGTAATAAAATAAGTTATCAAGATAAGGTATCTTCATGTTTTTTTATGGCCACTTTATTCTTTATATATCATGTATAAATATAATAGTTAAATTTAATATATATATATATATATATATATATATATATATATATATATATATACACACGCGCGCGCACTAAATCATCCGGTTT
CmoSSR00417	p3	(CTT)7	Cmo_Chr01	3308789..3309815	CTGGGTAAGTCGTCCACGTT	60.03	GCAGTCGAGAAAATTGAGGC	59.96	CTGGGTAAGTCGTCCACGTTGGCAAAGGGCACAGGCCGATCTGGGAACGGATAGTGCACTTTTTATGGCCTTTTACCATTTATTATTTTTATTTTAAAAAATTTAATTAAAAAGAAATCTTTTTTTTTTTTAAATTTTAATTATTACTATTTTTCTCTCTTTTTCTTGGCAGTTCCGAATATCTCGAAATATCTAAACCAATTGATTTTCTTGATTGCTTCCATTTCTTCATACTTCTTCTTCTTCTTCTTCTTCTGTCTTCGTTCTTTCGCCTCAATTTTCTCGACTGC
CmoSSR00418	p2	(AT)19	Cmo_Chr01	3314338..3315381	ATAGCATGTAGGGCACGACC	59.98	CGTTGCTAAGTAATCTCTCCCTC	58.62	ATAGCATGTAGGGCACGACCTCGTAGACCATTACATATATATACACAAAATAAACATGTAGGATGAGATTCTATAGATCATATCATATAATAACCCTGTATCCATGTGTATCCTATCATAACAAGTAAGACTGTTATCTTGTAAAGTTACCTATCCTAAACTATAAGTCTGGTTCATTCTTGTTCATCATAAAGTGATATATATATATATATATATATATATATATATATATATAGCTAGAGAGAGAGGGAGAGAGAGAGAGAGAGAGAGAGAGAGAGAGGGAGAGATTACTTAGCAACG
CmoSSR00419	p2	(GA)15	Cmo_Chr01	3314391..3315426	TCTGGTTCATTCTTGTTCATCA	58.2	TGCCTTGGGAACTTTTTCTTT	60.1	TCTGGTTCATTCTTGTTCATCATAAAGTGATATATATATATATATATATATATATATATATATATATAGCTAGAGAGAGAGGGAGAGAGAGAGAGAGAGAGAGAGAGAGAGAGGGAGAGATTACTTAGCAACGTTCCAATTTCTGGAATCAGTAAATTATTCAATGATTGTTCATGCAGAGCATAAAATTAAAGTAGCATAGATGATTTTGTCGCACCTCTAGAACAAATTTACCAGAATCAGAGAGGTAAAAAAGAAACAAAAGAAAAAGAAAAAGAAAAAGTTCCCAAGGCA
CmoSSR00420	p2	(GA)12	Cmo_Chr01	3319678..3320707	TGGCATGTCACTCGAGATTT	59.25	TGTGGGCAAAGTTTGTTGAA	60.13	TGGCATGTCACTCGAGATTTTCAATTATTCTTTTTTGTAAGGTTAACGACCTTTTACGATAGATCATAACATATATGAACTTATGTAAATCGTACGAACATAAAACATGAGTGAGAGAGAGAGAGAGAGAGAGAGAGGAGATTTGGAAGACATGAAGTGATTTGTGTGTGTTGGTCAATAGCTAAGAAGTAGGCTTATGTAAAGGAGAAAGAAAGGCCTTAATGAAAACTCTGCTGGATCTTCCCTCTTCAACAAACTTTGCCCACA
CmoSSR00421	p2	(TC)10	Cmo_Chr01	3329279..3330304	GAGGGTGACTGAGCTCCTTG	59.99	AGTTGCCACAAAAAGGAACG	60.15	GAGGGTGACTGAGCTCCTTGGGTTTGAAGATGAAGTTCTTATTAACTTCATATACGGCCTTTTGGATGTCAAGGTAGTTAAAATATTTGTACAATAGAATTCAGGCAATTTTCTGCTACCTCAATATCTTACTCTACACTTCTCTCTCTCTCTCTCTCTCGCTATCTATCTATCAACCTTTGAGATGGTAATAGGTATTTTATCCACTAAGTTCAGATTTGCCTCTCAGATTTTCTTATTATAATTGCATTATGTGATACATGGTCGTTCCTTTTTGTGGCAACT
CmoSSR00422	p2	(AT)9	Cmo_Chr01	3339212..3340235	GCATGACAAGTTTAGTTTAATGCAG	59.32	ATTTGGGTTGGATTGGATCA	59.99	GCATGACAAGTTTAGTTTAATGCAGTTAAAGAATCTTAAACTATAAAATATATATATATATATATAAAATGGTGTAAACTTATCATTAATGTAATCCTCTTAGTATATTTTATATATTGTTATTTGACTCGGTTTTATCCCATGAACCCGAAACCGAACTGAGTCAGCTCGAATTCAGAAAAATGAAACAAACCAATTCAAAAAGCTGATCCAATCCAACCCAAAT
CmoSSR00423	p5	(TATTT)4	Cmo_Chr01	3352217..3353242	CACCACCCCAATTATCCCTT	60.8	CCTTTTCCCTGCCTACCATT	60.31	CACCACCCCAATTATCCCTTAAAATATAACATTAAATTCTAAATAACTACGTGGAAAATTAAATTTAAATAATTAATGATAATTAAACTATTAAATAAATAATAAAAACGTCTTAAATTAAATTTCTTCCAAATTCATGAACCAAATATTTTATTTTATTTTATTTTGGTATATTAAAAAATAAATAAATAAAAGGGTAAAGAATGACGAAAATACCTTGAAAATGGTAGGCAGGGAAAAGG
CmoSSR00424	p6	(GCCATA)4	Cmo_Chr01	3357395..3358424	CGGCCAAAAGACAAAGGTTA	60.1	GTGAATGTCCCTCCTCCTCA	60.05	CGGCCAAAAGACAAAGGTTAATGGATTGCTCATGTTCGCCATTGCAGCTTTTGGCTTCCTCCTTAACTTAGTTATGGTCATGTGGCTTGGCCATAGCCATAGCCATAGCCATAGCCATTCTTGTCATCATGATCACTTGGATCATGACACTGACCATGAGGAGGAGGGACATTCAC
CmoSSR00425	p5	(AATAA)5	Cmo_Chr01	3369132..3370162	GAACAGATTTCGTGCGAATTTA	59.26	TCACTAAAAACATGTGGGAGAA	57.28	GAACAGATTTCGTGCGAATTTATATTGAAATGAAATAATTTTATCATAATTATAAGAAAACAATAAAATAAAATAAAATAAAATAAACTCATTCTTTAATTCTCCCACATGTTTTTAGTGA
CmoSSR00426	p2	(AG)11	Cmo_Chr01	3375772..3376799	GCATCACTCATCTCTTGCCA	59.95	TGCGGAAGCCATTAATTAGG	60.05	GCATCACTCATCTCTTGCCAAACAAAAACAGAGAGAGAGAGAGAGAGAGAGATCCTTCATCTTACCTTTTTCGTTTTGTTTTGAACCCAATCGACAGGAACACCTAATTAATGGCTTCCGCA
CmoSSR00427	p2	(TA)11	Cmo_Chr01	3377089..3378116	TTGTTGTGTTCTTCATTTTGCC	60.02	TTTTGTAGCTGGTGCGTGAG	60.05	TTGTTGTGTTCTTCATTTTGCCAATATGTTTGTTTGTTGACTTTGAGAAAAATGATGATCTTCACTCATTTTTATAGCTAATTTTTTTAAAAATTTTATTTATATATGACTGTACTAATGGTAGTTGTACTATATTTTATATGTAGTACAAATTTATATATATATATATATATATAATTAGTTTTTAAAATTTATGGTCAATGAAATTTAATAAATTTCTAAAAATAGATTTCATTTTTATTTTTATTTTTATGTTGCTTGACTAGGCTTAACAACTTCTCACGCACCAGCTACAAAA
CmoSSR00428	p4	(AAAT)5	Cmo_Chr01	3380411..3381436	CCAAAATAATTAAAAGGGCGG	59.71	TCATCCTGCTTACTGAGATTATCG	59.78	CCAAAATAATTAAAAGGGCGGAAAAGGAAAATAAATAAATAAATAAATGTATATTTTCAAAATATAATTCAATTTTTTTAAATTTTGAAAAGGCAAGAAAAATTAAGGCTAATTATAAAAATATAAAAAGAAAATAAAACTCTCAAATAATAATTCTAACATTTCTTTTTCCTAATTCTATCGATAATCTCAGTAAGCAGGATGA
CmoSSR00429	p3	(ATT)7	Cmo_Chr01	3385042..3386068	AAGCTCTCATCCCTCTGCTCT	59.74	CTTCATTTTCTCGGAAGCCA	60.32	AAGCTCTCATCCCTCTGCTCTATGCTTTCTCAAGAGGTTTTGGATTATAAATTCATGATTTTTTCCTAAATTAGCGGAGTGATTCATCCACAAATTATTATTATTATTATTATTTAATAAAAATTTAATGGAATCAAATTTGGAAATTGAATAATAAAAATAAACTTTAGTACGAGCTAACTTGTAGTACACTCGCGAGCTTAGCTGGTAGTACAATACAGCTTCATTATTTGATTGGCTTCCGAGAAAATGAAG
CmoSSR00430	p2	(TA)11	Cmo_Chr01	3386259..3387286	GCGGTTAGCGATGGTAAAAA	60.1	TTGTCGTGTCTCACTTTTTGAA	58.46	GCGGTTAGCGATGGTAAAAAGTCTAAAATATATAGACTCTATGATCTAATGTCCTAGAAGATAGTTATATATATCTATATATATATATATATATATATTAATTTTCAAAAAGTGAGACACGACAA
CmoSSR00431	p3	(CGG)7	Cmo_Chr01	3392129..3393155	TCACAATCGCTCATACTCGC	59.98	ACCTCATCGTAAATCACGCC	59.96	TCACAATCGCTCATACTCGCTTCAACTCCCCCGATCCTTCTAACTATCCGTTTTTTCAATTCCTTTATTTAGACGACGGAATTCCAAAGCACGAAGCTATTCCGGCCGATCTGATCGCCGTGCTTTTGGACCTCAACGTTAATTGCAGAGCAAGTTTCGAAGATCAAATGCGCAGATTGATCGGCGGCGGCGGCGGCGGCGGAGGAGCGGGGGAGGAGGTCGTGGCGGGCGTGATTTACGATGAGGT
CmoSSR00432	p4	(TTTC)5	Cmo_Chr01	3396847..3397872	CAGCGTTGCTGTTGTGATTT	59.91	GACGCTTCGACGCATATTTT	60.24	CAGCGTTGCTGTTGTGATTTCTTTGATGACGAGCTTTAATTTTGATTTCAACAATGACTATTCACCTTGCTCTAGAAGCCTCTAAGGTTTCCTTCTCGTATATTTTCTTTATCGTTCTTCGCTTTTGATTGTTTCTTTCTTTCTTTCTTTCTTTTTGATGGTTGATTCTTTCAAATTTTGTGAAGCTATGGAGAAAAATATGCGTCGAAGCGTC
CmoSSR00433	p2	(TG)9	Cmo_Chr01	3423612..3424635	TTCTTATTTCTGTGCACGATCA	58.44	GCCTCAAGGTTTTGGACAAG	59.71	TTCTTATTTCTGTGCACGATCATCCATGATACTCATATGTATATCTATATTATCAGATAGAATGTATTACTATTTTAATTTCACAATTTATTGAGGATGTACGTGTCTTTTTTTTGTCTTGTGTGTGTGTGTGTGTGTATTTTCTAAGTATTACACCTCATTGAAGGATCTAAGTATCAAAAGTATATCTTAATCTTCTATTTTAGCTTTTAAATTCTTCTTCTCATAGCATATCACATGCATAGCACTAAGTTTAGTGATTCATAGTCGTCCATATACTTGTCCAAAACCTTGAGGC
CmoSSR00434	p3	(TTA)7	Cmo_Chr01	3427093..3428119	TCTTTCCCTTTGGGACTGAA	59.64	TTCAAAGCTGAATTTGCTGC	59.19	TCTTTCCCTTTGGGACTGAATTCATTTTTTAGCTCAATAATCTATTGAGATGTTTAGTTGCTGTTGTTTCATCATATATTTGTTTGGATTGATATTTAAAAGAAAAAAGAAAGTTGAAATACAAATTGGGTACTTATGTCTAGGCTAATTTCCAATCTAGTCCTTATTTTTTCGATTTTTTCGATTTTTTCGATTTTTTGGATGGTAATTGATATTTTCTCGTACAAATATAACATTTATTATTATTATTATTATTATTTTATGCAGCAAATTCAGCTTTGAA
CmoSSR00435	p7	(AAATCTC)3	Cmo_Chr01	3436731..3437757	AGCTAACCTGCTGCCAAAAA	60.02	TGGACTAGAGAATCCCGTGG	60.07	AGCTAACCTGCTGCCAAAAAAACTTCAAGTGCACAGAAGCAAAAATCTCAAATCTCAAATCTCTTGCAACAAACCATCCAGAGATCCCGTAAATATTTGAAGTTGAACAATTTAGACAACATTAATAATGAGAAACATCTCGAGACTATGAAATTGTACTTGGTTTAATTTTTTACCTTCTCCACGGTGATTAATCGACCTTCAAGTACAGATCGATTTAGATATTTGATGCAACGTTCAGCCTCATCATTACTAGACATGGTAATGAATCCAAAACCACGGGATTCTCTAGTCCA
CmoSSR00436	p6	(CTGGGG)4	Cmo_Chr01	3439159..3440188	GCTGAACCTGAAGATGCTCC	59.96	TGGAGAAACAACACCAGCAG	59.87	GCTGAACCTGAAGATGCTCCTCCTTGCGACTGAGGGGCAGAGCCTTGTGGTGCAGAATGCTGCTGGTATTGCTGGCTACCTGGAGGGGGCTGGGACTGGGGCTGGGGCTGGGGCTGGGGCGGGGGTGGCATGTTCGAATGATAAGGAGGGTATTGTGGATAATGTTGCTGCACATACCCATATGGCGGATAAAATTGCTGTTGATATTGTGCATGTGGTGGTGGTGGGTGCATTGCGTGATATGGATATTGATGTCCCTGCTGGTGTTGTTTCTCCA
CmoSSR00437	c*	(TTCTT)4(TTAT)10*	Cmo_Chr01	3443214..3444277	CGGACGTGTAGGGTTCACTT	60.03	AACGAGCTTGATGCCTGTTT	59.88	CGGACGTGTAGGGTTCACTTCTTCTCCATCTCTTCTCTTCTTTTCTTTTCTTTTCTTATTTATTTATTTATTTATTTATTTATTTATTTATTTATTTGTCTTTTTCCAATATTTATATATATATTTTATATGCAATGGTAAGTAGGTATTTAAACAGGCATCAAGCTCGTT
CmoSSR00438	p3	(ATA)7	Cmo_Chr01	3444581..3445607	TCCATTTGTAACATCGTGCG	60.52	CTCAAACGTTCAAGGGCTGT	60.29	TCCATTTGTAACATCGTGCGATTCTTATTAGATATAATTATAGATCTTATTAGATATAATTATAGATCTGCACCAGTATAATAATAATAATAATAATAAGAATAAGAATAAGAATAATAATTAAAAAAAAAAAAAAGTGTAGGAACATTTTTTTTTTTGTAAGAAATTTAAAATTAGTAGAACACAGAAGTTAGGCAAGAAATTGAGAGATGAAAACTTTATTATAATTTTGTTTGGAATGTAATTTAGATGCTGCAAGCACAGCCCTTGAACGTTTGAG
CmoSSR00439	p8	(TGATCGAT)3	Cmo_Chr01	3461296..3462325	GAATCCATTCATTGGTGGCT	59.76	GACAAACAGCACCACCACAC	60.05	GAATCCATTCATTGGTGGCTGGATTTCCCCTGCATGAGGCATGGCAGCAAGTGGCAGTAGCAGAATCCGCTGCGAGTTTGAAACCTTTGCAATCTCCATTCTCCATTTTGATGAATCCTGTTCCTGTCTGAAATCAAATTCAACTTCTTAGTAAACACAAAAACAGAGAATGAGGCTGATCGATTGATCGATTGATCGATGGAGAGAGTACCGTGTGGTGGTGCTGTTTGTC
CmoSSR00440	p2	(TA)18	Cmo_Chr01	3464624..3465665	CGAAGCCATTGAAATTGGTC	60.45	AACTTGTAATGGCGGACGAG	60.13	CGAAGCCATTGAAATTGGTCTCCAATTTATTTAATTATATATATATATATATATATATATATATATATATATCTACAAATTCCATCGTTCTCGTATTCATCGATCTCAAGAAAAGAGAGAAGAAAAAAAAAAACAGGACATGGCGGCGCTGCTGGTCGTGAGAGGCTTAGCGGCGGCGGTGGTGGCGGCTTTTTGTTTCATGTCGCCGCCGCCGGTCGAAGGCCTCGTCCGCCATTACAAGTT
CmoSSR00441	p2	(TA)9	Cmo_Chr01	3465244..3466267	GGAGCTCTCGAATAGCTTCCT	59.23	CTAAAGTGTCGAACGGGCTC	59.88	GGAGCTCTCGAATAGCTTCCTCATTCATGTGATAATATATATATATTTAAATGGTCCATTTAAAAAAATTAATGAAAAATTAAAAAATAGTCTCCTCATTCATGTATATATATATATATATATTTAAATGGTCCATTTTTAAAAAATTAATGAAAATTCAAAAAAATCTCTAGGACTATGGAGGACCAAACCCTTTAATCGAGTCTCGACTCATTTTTCTGGAGCCCGTTCGACACTTTAG
CmoSSR00442	p4	(TAAT)5	Cmo_Chr01	3476623..3477648	GGGCAGTGGAAGATGTAGGA	60.07	GAAAGGAAGATGAAATTACCATAGG	58.58	GGGCAGTGGAAGATGTAGGAGGCTGCTAACGCCATCGCTCAGCTGTGTGTCAAGGGCGGAGCGAAAGAGACGAAGAGGTTCCAAACAGTGTATCATTTTATTATATTATATTTATCATAAATTAACAAAAATACCCTACACTTTTTACTTCTTTAAATTAAAAAATATTATTCCAATTAGATTTAAATATAAACGATTTCTAAAATACTTTATAAACGTTTAAAAATACTTTTAGCTTATATAATTAATTAATTAATTAATTAAAATTCCTATGGTAATTTCATCTTCCTTTC
CmoSSR00443	p3	(TAT)25	Cmo_Chr01	3494716..3495796	TCAACCATTACGGGATCTCA	58.92	TTCGGATCTCGAAGTTAGCAA	59.97	TCAACCATTACGGGATCTCACATTGTTTATATTGAGTCTAGTTGAACAATGTTAAAGTTCAGTCATTTTACTTGTCCTCCCAAAAGTTACCAATCCTTCATCATTCTGTGTAGGAATTTGTAGGAATTTGTGCACTTTTTATCTTCCATAATTTCTGTTGTTATTATTACTATTATTATTATTATTATTATTATTATTATTATTATTATTATTATTATTATTATTATTATTATTATTATTATTATTTTATATTTATTTCTCTGTCTCTTGCTAACTTCGAGATCCGAA
CmoSSR00444	c	(AT)10(AG)11	Cmo_Chr01	3513327..3514374	GTGGGATCCCCTAATCCACT	60.01	GCCGTATAGCTCGGTTTGAA	60.23	GTGGGATCCCCTAATCCACTCCTTCAGGGCCCAGCGTCCTTGCTGACACTCTTTCCTCTCAAATTGATGCGAGATCTCACAATCCACCCACTTTCAAGGTCCAAAGTCTTCGTTAGCGCTTGTTTCTCTCTCTATTCCTTGTGGGATCTCAAGATCAAACTATATAACATACACTTTTAGATATATATATATATATATATAGAGAGAGAGAGAGAGAGAGAGGCCGGATCTTGGGCTGAAACACGTATTTCTAGCCCAAGAAGAAATGCATTCAAACCGAGCTATACGGC
CmoSSR00445	p2	(TA)11	Cmo_Chr01	3522847..3523874	GGGGTTTAACCAACCCACAT	60.7	AATCGAGCGGTGGAGATATG	60.06	GGGGTTTAACCAACCCACATACTCGAATCTAATTTAGTATTTGTTAATATTATATATATATATATATATATATTAATAATCAAAATAGAAATATTAGATTAAGTTTGATCGTATAATATAATTATATATTTTATCTTCATTCAATCGATTTGCAACTAAAAGTAAATAACTCTTATTGTTCGACTCTTTGATTCGTCTGTTTGTTTGATGTTTGTCGTCCATCTCGTTCGTGAAGCCTCGATTTTGGAAACGTTCTCACATATCTCCACCGCTCGATT
CmoSSR00446	p2	(AT)12	Cmo_Chr01	3524230..3525259	ATTGCGTTCTTGGTCAACCT	59.6	CTGTCTGACAAATCAGCCCA	59.83	ATTGCGTTCTTGGTCAACCTATCATATATATATATATATATATATATTTCATATTAAGATTTGGGTTATTGATAATTTATGAGTTTAAATTGAAATAAAATATTTAAAAGAATTATAAGAATCAAAATAGAGATCAAGGTTTAAAGTTAGTAAAAGATGGGAGAAGAGGACAAATGTGGGGGCCAGAGGTGGGCTGATTTGTCAGACAG
CmoSSR00447	p2	(TA)15	Cmo_Chr01	3531977..3533012	GCGGCTAAGGTTAAATGACG	59.74	TCAGTAAGGACTAACAGTGACAGAAAA	59.82	GCGGCTAAGGTTAAATGACGTCTAAATCCAAATTCCCACTCATTAAAATTAAATTAAAAATTAGGATAATTGACAAATTAAGAAAACATTTTTATGGCTAATTTTTTCTTTTTATATTATATATATATATATATATATATATATATAATATGACATGACATGAGCGAAAACAAATAATATAAGCTTCTCTCGAGTAAAAGTTTCTCTTTTCTACTTTTCATATCCTCGATTTAAACAGAGATTTTCTGTCACTGTTAGTCCTTACTGA
CmoSSR00448	p2	(AT)20	Cmo_Chr01	3535632..3536677	AGAAATCGGCAAGGATGTGT	59.56	TTGGTTTGCACGTCTTTGAA	60.27	AGAAATCGGCAAGGATGTGTATAGCACGGTTTCATAAGTACGAAAAATGTTCGATAATCATCTTTTTTTTTTTTTTAATTAAGTTTAAAAATATTACTTTTAACCGTAAAAATTTTAATTTAGAAAATAAAAATAAAAATATCTCTATAATATATATATATATATATATATATATATATATATATATATTATATGTTTTTATTTATTTATTTCCATTTTACCTAATTAAAAAAAAAGTGAAATGTTTAATTAGTTGCAATAGGCCCTTCAAAGACGTGCAAACCAA
CmoSSR00449	p2	(TA)18	Cmo_Chr01	3547025..3548066	ATTGTAACCGTGAGGCCAAG	59.99	CACTCAACAAGCAAGTTCCAA	58.96	ATTGTAACCGTGAGGCCAAGAGCGATACGTAACGGGCCAAAGCGGATAATATCTATTAGCTGGTTTAGGTTTAGGTTGTTACATCAATAAAGGCCATAAAACTAGCAAGATAATCATATCTATATCTATATATATATATATATATATATATATATATATATAAAAAAGCATAACATATCTCCCAAGTCTTGGAACTTGCTTGTTGAGTG
CmoSSR00450	p2	(TC)15	Cmo_Chr01	3550831..3551866	CCTTACCTGGTGGCTGTGTT	60.03	GCGTATTTGAGAAACGCCTC	59.85	CCTTACCTGGTGGCTGTGTTGTTTTGAAAAATGAAGACCAAAATCTTCCCTTCTGCCTGTATATAATCATAATTCAAAGCAATTGAAATCAACCCATTTCCCTTTTTTGCTTCTCTCTCTCTCTCTCTCTCTCTCTCTCTCCCTCCATGGGAAATTACAGGGTTTGTCTCTGTTTCATCAGAAGGTTTAAGATGTCCACAGACGAGCCACCGTCGGACGTCAAGGAGGCGTTTCTCAAATACGC
CmoSSR00451	p3	(GAA)7	Cmo_Chr01	3560998..3562024	GGTGTCATTTGGGAAGATGC	60.33	CCCGTGATTTAACACAGCCT	59.99	GGTGTCATTTGGGAAGATGCTGCCTCTGCAGATTGATAGAATTATGATGCTCCTCCTTCCCCTTCATTGAAGAACAATGGAAGATGAATTATTCTGAAATTTGAACGAACAATTCAAGAACCAGGAAGAAGAAGAAGAAGAAGAAGAGGAGGAGAACAAAACCAAGATTCTTCAGGGTGGGAGGCTGTGTTAAATCACGGG
CmoSSR00452	p8	(TTTTTATA)3	Cmo_Chr01	3561134..3562163	AGGCTGTGTTAAATCACGGG	59.99	CAGACGTGAGAGGTTCAAAATG	59.77	AGGCTGTGTTAAATCACGGGCATTGTCTATATAAAAAAAAACAGGGTGAGCAAATGTCTCACAGCTTCAGAGTTGAATTTTTTTATATTTTTATATTTTTATATTTTTCAATTTGTTAATAATATTATAAAATATCCTAATATTCTTTTCTTTTTCCGTTTTCCTATCATTGTATTTTTTTAAAAGATATATGTTGATTTGGTCTTTAAATCTCATATAAAAAACAGATTTTACATTCAGTAATTTTTTAAAAATTTAAAACCAATATTTTTTACATTTTGAACCTCTCACGTCTG
CmoSSR00453	p5	(TTTAA)4	Cmo_Chr01	3566972..3567997	TCGTTTAGCAAACCATTTTCC	59.11	AGGGCTTTTGAATTGATGTGA	59.56	TCGTTTAGCAAACCATTTTCCTTTTTTTTTTCTTTTTTTTTGGGTTTTATAATTTAGAACATATGAAAAAAAAAAGGGATATGTACATTAAGCATCTTTTTTTCAAAGGAATTTCAATGAAATGAATTTGTGTGTTTTAATTTAATTTAATTTAATTCTGTGTCACATTGAAAATGGTGTCACATCAATTCAAAAGCCCT
CmoSSR00454	p3	(TAA)8	Cmo_Chr01	3567087..3568116	TCACATCAATTCAAAAGCCCT	59.56	AAATTCAATCGCAAAGTGGG	59.94	TCACATCAATTCAAAAGCCCTAATCTTATCTCCATAAAGTTCTAAGCTTTCAAATAAAAAGTGGGATTTTTTAATAATAATAATAATAATAATAATGTTCTTACAATTTGTTCCCACTTTGCGATTGAATTT
CmoSSR00455	p2	(AT)10	Cmo_Chr01	3568423..3569448	TCTGATAACCCGATCGAACC	59.89	GAAAAAGGAAAACCCCAGTCTT	59.86	TCTGATAACCCGATCGAACCCCAAATCAACACAAAATGAACAAGTAGAATATATTAGAGTGCTCGAGTAAAATAAATAAGTTAAAAAAATAGAGACAGTTACAGCTAAGATAAAAAATTGAGGTAATATTTAATATATATATATATATATATTTTTTCAATAATTGGATTTTTAGATGGGTTTGAAAAATTATTTATTATTATTATTATTATTTTAATGTAAACAAACAATTCCTAACTTTTTCTATTTAATAAATTAAAAAAAAAAAAAAAAAAAAGACTGGGGTTTTCCTTTTTC
CmoSSR00456	p4	(AATT)5	Cmo_Chr01	3568841..3569866	AAAAGCACTGTCTTCCCACG	60.29	AGGCATCCCCAGCTCTAAAT	60.06	AAAAGCACTGTCTTCCCACGCGCCTTGGTTGGATCGTGTCGTACACGCGCTTTTTTAATATTTAAAAAAAAGAAATATAATTCATAAATGGAGGCTGCAAAATACACCAAAGCAATGTCAAATCAAACACTTTTTCTCTCTCATTACTTATTAATTTTCCAAACCCAAAAAAAATTAAAATAAAAAAGAAAATTAATTAATTAATTAATTATTGATTTATTTAGAGCTGGGGATGCCT
CmoSSR00457	p4	(AATA)7	Cmo_Chr01	3570287..3571320	GCTAAGAAAATGAGCGTCCG	59.98	TCAACTGTGGTGCTTGGAAA	60.28	GCTAAGAAAATGAGCGTCCGTTCCAATCCGAAGGAATCTAGATTTGAACTATAAATTTTAGTAACGAACGGTTTTTTATTTTCTCTCAATCGAAAAATAACTCAATAATTCATCTACCCATTTATTATTAACAAATTTGAATAAATATTTTATAAAAAATTAAAAAAAAAGAAAAAGAAATAGAGGCAATTTTCTCTCACTTCATAATGAATAAATAAATAATAAATAAATAAATAAATAAATAAATAAAAAAGGGACCCCTCAATTTCCAAGCACCACAGTTGA
CmoSSR00458	p7	(GACCCGA)3	Cmo_Chr01	3580652..3581678	CCCACTCCCATAAATCTCTCA	58.99	GAACCGAATAAGCCGTTCAA	60.07	CCCACTCCCATAAATCTCTCAACTCATTGACCCGAGACCCGAGACCCGAGACTCGACCTAGAATGTGACCCACGTGCATAAGTCCAACATTGAATCTGCTCGGCTCAACGGCTCCTCCTTAGCTTGAACGGCTTATTCGGTTC
CmoSSR00459	p2	(AT)9	Cmo_Chr01	3586186..3587209	AAACAAATGCACACCGATCA	59.97	CTTAAAATGAATTGCTATGGGC	57.87	AAACAAATGCACACCGATCATTCAAATTAAAAAAAATTAAAAAAATGTGAATGCACATCAAAATTGACACTTTGATTTTGAAATCAAAGGCTTACACGTTCCTGTCAATTTCACCAATAAAAGTTACATACATTTTATTCCAAAATATATATATATATATATTAAATTCACAAATTTCAATGCACAAAAAATGACGTGGCATTTTTTTTGTGGAAGGTCCACACGTGCGGGCCCATAGCAATTCATTTTAAG
CmoSSR00460	p8	(AAAAAAAT)3	Cmo_Chr01	3590341..3591370	TATCCGGTCCGGTAGAGCTT	60.97	CCAGTTGTTAGGATCGCACA	59.72	TATCCGGTCCGGTAGAGCTTTGAAAATGTACTTTTCTATTCTCTGTACTCTCTTGTTGTACATACCTGAAGTCATCAATATAAAAAAAATAAAAAAAAAATAAAAAAATAAAAAAATCCTTTTAGCTAGAGTTCTCCTTGCAATTTTCTCTATCTCATTCTTTGTGTTCATCTAGATCGAGTGTGTGCGTTGTTGTGCGATCCTAACAACTGG
CmoSSR00461	p3	(TTA)8	Cmo_Chr01	3592654..3593683	TCAGCTTCTGAAAAGACCTCG	59.74	AACGTTCAAACAACCTCCCA	60.39	TCAGCTTCTGAAAAGACCTCGTACCAATGGATAGTAAGGATGATTTAAAGGAAAAAAATAACGTTTTGAAGTGGTGAAGTTAATGATTTAAAGGCAAAATGGTACGTTAACTTTGCCAGTTCAAAATGTTCTTTTTATTATTATTATTATTATTATTATTTGCTAATTATGGGAGGTTGTTTGAACGTT
CmoSSR00462	p5	(ATTTT)4	Cmo_Chr01	3595499..3596524	TGGGATGAGAGGTTAGTGGG	59.92	CGTTTCGGTTGAGAATGACA	59.69	TGGGATGAGAGGTTAGTGGGGGAGAGGTGAATAATTTTATTTTATTTTATTTTAAGTAATCATTTTTAGTTATTTATTTATGAATTATTATTATTATTTTACTTTTATATATATATATATATATATATATTTTTGAGCTATTACAACATCCTTATTAAAATGATTAAGAAAAGTGTACCAAATAAAGAGAGATTTCAGTGTTCGATATTTTCATACATTACCATACGAATTTCAATCTTCATTTCATAAATTTGATAATATTATTGTCATTCTCAACCGAAACG
CmoSSR00463	p2	(TA)12	Cmo_Chr01	3595571..3596600	TGGGATGAGAGGTTAGTGGG	59.92	CGTTTCGGTTGAGAATGACA	59.69	TGGGATGAGAGGTTAGTGGGGGAGAGGTGAATAATTTTATTTTATTTTATTTTAAGTAATCATTTTTAGTTATTTATTTATGAATTATTATTATTATTTTACTTTTATATATATATATATATATATATATTTTTGAGCTATTACAACATCCTTATTAAAATGATTAAGAAAAGTGTACCAAATAAAGAGAGATTTCAGTGTTCGATATTTTCATACATTACCATACGAATTTCAATCTTCATTTCATAAATTTGATAATATTATTGTCATTCTCAACCGAAACG
CmoSSR00464	p5	(CCAAC)4	Cmo_Chr01	3600222..3601247	CAACCCTACCCGAAATGCTA	59.95	CGCTTTGCCTGATAACAACA	59.87	CAACCCTACCCGAAATGCTAATCCAACCCAACCCAACCCAACCCTTATGGCTCGGGTTGAGTTGGTCTTGGTTGTCGGGTTGAATGTACACCCCTAATTTCTTCAATTCCTGTTGTTATCAGGCAAAGCG
CmoSSR00465	p2	(TA)16	Cmo_Chr01	3624422..3625459	TTATGAAGAAGGGTTGGTTGC	59.08	TTCGTGACACTTCAACATCAA	57.72	TTATGAAGAAGGGTTGGTTGCAATTGATGTTGTAACATTATTGGGTGATATAATTATGAATTAAAAAAAGCATCTTTCAACATTCCTATGTTTTAGTAATGATGTTATTCCTTTCTTTTCCTTTTTTTTAATTAAAAAATGCCTAGTGAATAGTGATGATAATTATATTAAAAACCTAAATTATATATATATATATATATATATATATATATAAAATACTTTTAATTTTTTTTTAAAAATTACAATATTATTTTTAAGTTTTAAATATTGGACAGTCAATTGATGTTGAAGTGTCACGAA
CmoSSR00466	p6	(AAAAAG)5	Cmo_Chr01	3626072..3627107	TGAAACTTGGAGGGGAAAAA	59.52	TAGGGCAAAATTGTGAAGCC	60.07	TGAAACTTGGAGGGGAAAAAAAGAAAAAAGAAAAAGAAAAAGAAAAAGAAAAAGGATTCGTCTTTATCCAAAAATAAATAAATAAATAAATAAATAATTACGTGGACAAATTCATTCCCCTTGTTTCATCTTCCTTCCATTCTGTGGCGTGTAAAATTGTTGTGAGTTATCCCAAAATCCCAATTGCTTGGCTTCACAATTTTGCCCTA
CmoSSR00467	p4	(AAAT)6	Cmo_Chr01	3626119..3627148	TGAAACTTGGAGGGGAAAAA	59.52	TAGGGCAAAATTGTGAAGCC	60.07	TGAAACTTGGAGGGGAAAAAAAGAAAAAAGAAAAAGAAAAAGAAAAAGAAAAAGGATTCGTCTTTATCCAAAAATAAATAAATAAATAAATAAATAATTACGTGGACAAATTCATTCCCCTTGTTTCATCTTCCTTCCATTCTGTGGCGTGTAAAATTGTTGTGAGTTATCCCAAAATCCCAATTGCTTGGCTTCACAATTTTGCCCTA
CmoSSR00468	p5	(TTAAA)4	Cmo_Chr01	3629574..3630599	CGTGCCATTTTAACCGTTTT	59.87	GTGGACCATTGATTATGGGG	59.87	CGTGCCATTTTAACCGTTTTTTCTTCGAATTATCCACATTCCAAATATCCCAAATTCATAAATAATTTAAATTAAATTAAATTAAATTCTATTTTTATTATTTATTTTTTATTTTTGCACATTATTATTCCCCCCATAATCAATGGTCCAC
CmoSSR00469	p8	(TTTTAAGA)3	Cmo_Chr01	3633668..3634697	GTTGGTTGGAGGGAGAATGA	59.9	CATGAAGTGCCAGGAGAACA	59.83	GTTGGTTGGAGGGAGAATGAAACATTCTTTATAAGGTTGTGGAAACCTCTCCCGAGCAGACACATTTCAAAAACCTTGTAGGGAAGCCCGAAAGGAAAGCCCAAAGAGGACAATATCTGCTAGTGGTGGTTTGGGCTTGGGCTTAGGCTTAGGCTGATACAATATGGTTTTAAGATTTTAAGATTTTAAGATGAATGTTCTCCTGGCACTTCATG
CmoSSR00470	p7	(CAATTCT)3	Cmo_Chr01	3641273..3642299	AAGCCAAACAAGGCTTCAGA	59.99	CATCCAATTCTCCCTCTCCA	60	AAGCCAAACAAGGCTTCAGAGATCTCAATTATTTAGGAGAATGAATCAAAGTTATGAACAATCTTATCTCAAAGAACCATTTACATACATAGAAATAAGCCAACACAATCTGGAATAGATCAAACCAAGCCACCCCCCAATGAGGTGGAGGCGAATCCAATTCTCAATTCTCAATTCTCAACACCACCAGCTTGCAACTGCAAATCTATGGAGAGGGAGAATTGGATG
CmoSSR00471	p2	(AT)10	Cmo_Chr01	3648582..3649607	TAGCCCATTTGTAACAGCCC	59.96	CGTGCAACATAGACTTCCACA	59.77	TAGCCCATTTGTAACAGCCCAAGCCCACCGCTAGTAGAAATTGTCTTCTTTGAACTTTCCCTTTCGGATTTTCTCTCAAAGTTTTAAAATGAGTTTATTAGGAAAACATTTTCACACACTTGTAAAGAATATTTTGTTATCCTTCCCAACCAATGTATAATCTTACGGATCATATTCTCCATTCATATATATATATATATATATTTTTTAATGTGGAAGTCTATGTTGCACG
CmoSSR00472	p6	(ATGATT)4	Cmo_Chr01	3649991..3651020	GCGTAAGCGGCTTTAGTTTG	60.04	TTCAGCTAGGGCCGTAGAAA	59.97	GCGTAAGCGGCTTTAGTTTGAGCAATCATTCCTTGGACTCTCTCCTAAGCATCCTTAACAAATTTGGCTTGTTCGATCGTAAACTTAAAAGAACAATGTTTAGAATTATAATGACATTTTGTTATCGTTGTTATTGATGATTATGATTATGATTATGATTATAGGCTGTGATTAACAACATGGAAGAAGCTCATGCTCAAATTGACAAAGCCATTTCTACGGCCCTAGCTGAA
CmoSSR00473	p3	(AAT)10	Cmo_Chr01	3656975..3658010	TGGGCCGAAAATAGCAAATA	60.4	TGTCATGCACATTAATAGCTCG	58.87	TGGGCCGAAAATAGCAAATAGAACTCGGCCCATTAAGAGTTGGATTGAATCCCTAGGGTCCACTAAGCAATATTAGCAAATATCAATAATAATAATAATAATAATAATAATAATTAATTAATTTCTAAACCTTCAAAATTATTTAATTCTCTCTTCAATTTATTATTATTTTTTCTTTTAGTTTATGGATAATAAAGTTATTAGTTATCTATTTTCATTTACGATGTTAAACTCAATCTCGAGCTATTAATGTGCATGACA
CmoSSR00474	p7	(TTTAGGG)3	Cmo_Chr01	3673370..3674396	TCTCGACGCTCTTTCATGGT	60.94	CCCTAAATCAGTCGATAAACCC	58.89	TCTCGACGCTCTTTCATGGTGGAGGTAAAGTTTAGGGTTTAGGGCTTAGGATTTACAGACTAATTTAGAGTTTAAAGTTTAAGGTTTATGGATTGATTTAGGGTTTACGGACTAATTTAGGGTTTAGAGTTTATGGAATAATTTAGGGTTTAGGGTTTAGAGACTAATTTAGGGTTTAGGGTTTAGGGTTTAGAATTTACAGGCTAATTTAGAGTTTAAGGTTTAGGGTTTATCGACTGATTTAGGG
CmoSSR00475	p2	(GA)10	Cmo_Chr01	3674280..3675305	AACCTCTCAAAAACTGCCGA	59.85	CAATATCGCGCCCTATTCAC	60.44	AACCTCTCAAAAACTGCCGACCACAAAAAATCGGTTAGTTTTGAGACTCTAAAAGCTAAGTTCAATTCTTTCCTTTTGTTTTGTAAAGAGAAAGTCACGAATAAGGTGATCTTTTAGTATTATTTTGATAGGTAAGCAAAGAAGGAAGAGAGAAATGAATCTCTCGACACTTTTTGGTGGTGGAGTTAGAGTTGAGCCATCGAACCGACTCGTGGAGATGGAGAGAGAGAGAGAGAGAGAGTGAGTTTGTAATTGGTGAATAGGGCGCGATATTG
CmoSSR00476	p7	(ATTTTTA)3	Cmo_Chr01	3674496..3675522	ATATTGGGGTTCCTGCCTCT	59.79	TTCTTTTTCCAATTGTCGGC	60.05	ATATTGGGGTTCCTGCCTCTTTCCAAGTAATTATGAGAAGATTGATGAATGGAGTTTGTGGAACTTGAAAAAGAAAAAGGAAAAAATAAATAAATAAAGGAAGACCAAAAAAAAGGATGGTTCATTCGAAAGTGATCAATGTTAGATTTCCACTGGTCCAGTGTGAGATTTTTAATTTTTAATTTTTAATTTTAAAAGGCTTAAACTATTAATTTTTATTTATTTATTAAAAAAAAAAAAGAAGAAATAAAATATTTTGGCCGACAATTGGAAAAAGAA
CmoSSR00477	p7	(TTTTTTA)3	Cmo_Chr01	3674692..3675718	GCCGACAATTGGAAAAAGAA	60.05	GTGGGGCTTGCATATCAAAT	59.79	GCCGACAATTGGAAAAAGAAAAAAAAAAAGATGAAAAAGTTGGGAAAAGGATTGATTGTGATGGGTTAGTGAGTGGCTGCTTCTTAAGTGTGTCTTTTTTTATTTTTTTTATTTTTTATTTTTTATTTATATTTATTTAAAGTGAAATGATTAATTTTAAATTCATTAATTCAGTGAGTTACCTTTCTTATTTTAGTGTTTGTTACTATAGTTTTATTTATTTTTATTTTTATTTTTAAGATAATGTACCAATCATACATATTTGATATGCAAGCCCCAC
CmoSSR00478	p2	(AT)16	Cmo_Chr01	3678082..3679119	AAAACACCATCGCCAAAAAC	59.85	GGAGCACGCCCATAAGAATA	60.06	AAAACACCATCGCCAAAAACCTCTTTTCATATATATATATATATATATATATATATATATTTAAAAGGAACATTCTTTTAAACCCATGATTAGATTCTTATAACTAGTTTACATTACATCCACACGAGAGAGAATAGAAGGATTTTAATCAAAATTAATATCCGTACGACACAAAATTTAAAGAAAAAAGGTTAAAATTTATAAACCAATGAATAAGAGGCACATACCAGAACATATTCTTATGGGCGTGCTCC
CmoSSR00479	p2	(AT)14	Cmo_Chr01	3692522..3693555	TGTCACTGTGTCAATCGCAA	59.87	ACCGTGGAGATTGAATGGAA	60.32	TGTCACTGTGTCAATCGCAACGTTCAAATTCTAGATGGCTTGACAGTGACGTGACAATCATGGAGCTACAAGAAGTCGAAACATGTGGTTTAAAATATATATATATATATATATATATATATAGCGTTCATCTTGAATCACGTGAGTAGCTCGCCCGGCTAATATTTTCGACGGGATCTTTTTTCAATTAAATTAAAATCCCAAAATTCTTTCCATTCAATCTCCACGGT
CmoSSR00480	c*	(TTAT)5(TA)16*	Cmo_Chr01	3692942..3693996	TCCAAATGTGGAAATTGGTT	57.76	ATGACCCGACCCAAAACATA	60.05	TCCAAATGTGGAAATTGGTTATAACTTAATTGACAAGGAAAAAAAAGGTAAATATTAAATTTAAATATCTCATTCTATTTGCATTATTTATTTATTTATTTATATATATATATATATATATATATATATATAATAAAAATATGGTTTAGATAACTAACAACTTCACCGTCCAACTCATATGTTTTGGGTCGGGTCAT
CmoSSR00481	p4	(TAAA)6	Cmo_Chr01	3696060..3697089	TTGCCCATAGAAATGCCCTA	60.42	TCATCACAGTTGCAACCCAT	59.97	TTGCCCATAGAAATGCCCTAGTTTGTTTAAATAAATAAATAAATAAATAAAGTAGAAAAAGAATGGTAATAAGGAAAAGGGGGGAGAGTTAGAAAGAGAGAAGGAAAGCTGGCACGCGGAGTTCCGTTGGTAACGAAGGGAAAGAGGGCGCAGGCTCGTGCATGGGTTGCAACTGTGATGA
CmoSSR00482	p2	(AT)16	Cmo_Chr01	3699266..3700303	TGAGCTCTCGTTGAAACACG	60.18	ATTTGCAACACTTGCTGCTG	60.06	TGAGCTCTCGTTGAAACACGACTCGATTTATGCAAATATCAATAAAATAATATATATATATATATATATATATATATATATACACATGTGATTATTATTGCAGGCACATATAGCAATTCTATCTCCTCAAGTGGAGCTGTACAAAAACCAGCAGCAAGTGTTGCAAAT
CmoSSR00483	p5	(AAAAT)5	Cmo_Chr01	3718794..3719824	CTCATGGTAGTAAGATTTGTAAAGTGG	58.75	AAATGACCAAAGATTGAGCACT	57.87	CTCATGGTAGTAAGATTTGTAAAGTGGAAAGAGATAAAAATAAAATAAAATAAAATAAAATAATAAACTAGATAGCCGTTGGAAAAAATAAGTTAAATTAAAAAGTTATTTTGATATTTAAATGTGGAAAGGTGAAGCTAATAATAATAAAATCGTCGACAAATCTCCACATATAAAAGTGCTCAATCTTTGGTCATTT
CmoSSR00484	p7	(AAATTTT)3	Cmo_Chr01	3725736..3726762	AACGCTCTCCTCTCTCCCTC	60.1	ATGTGGTGGTGGGATTGTCT	60.1	AACGCTCTCCTCTCTCCCTCCCCTTCCCACATCTCCTAAATTCCACAACACAAATTAAAAAATAAAAAATTTTAAATTTTAAATTTTAAAAAATTAAAAAAATTAAAAATTAAAAAGCCCTTTTTTTTTTTCTTCCAAAAAAAACAGACAATCCCACCACCACAT
CmoSSR00485	p5	(TTATT)4	Cmo_Chr01	3727591..3728616	AAACAAAAATTGAGGAAGTGGG	59.39	ACCTGAAACTGGGCAAAATG	59.97	AAACAAAAATTGAGGAAGTGGGTTAAATTTTTATGTCGTGAATTATTTTATTTTATTTTATTTTTTTTGTGAAGAATTGGTATAGAAAAACACAGAAATTGGATGAAATATATGAAAAATCCATCTTTTTTCATATAAGTTCAACCAATTATACATATTTCTCTCTCTGGTCCCTTGATTTTCTGTATTTATCAATCTTTCTCTTTCTCTTTGGTTATGACACAAAAACACGTGCGTTTCTTAAGCATTTTGCCCAGTTTCAGGT
CmoSSR00486	p2	(AT)12	Cmo_Chr01	3728622..3729651	ACCTTACGCTCACACCCATC	60	CAGACAAGGACGATGATGAAAA	60.11	ACCTTACGCTCACACCCATCTCCAAATTTCAAAACCATTTGGTATATATACATACACACATACATACATATACATACACACACTCACATATATATATATATATATATATATGTTCTTTTTAGCTTTTCTCTGTTACCTATGGAAAACATCTTTTCATCATCGTCCTTGTCTG
CmoSSR00487	p2	(TA)12	Cmo_Chr01	3729402..3730431	GACTTGGATGATGGGGTTTG	60.17	TACCCACCGCCGTATATCTC	59.81	GACTTGGATGATGGGGTTTGTGTACTCTCACTGCTCTTCTCTTCCCACACCCCTTCTTTTAGCTCCAAAGAATCTTTTATTTTTATTTTATTTTATTATATATATATATATATATATATAAGAAGACAGTAATGAATGGTGAGTACTGAGTCCAACCCACGTGAGGCTATACTTGCATTGTCCACCATGCATTTTGAGGCCGCCATCATTTTTTTTAATTCATATGTACTTTTTGCTCCGACGAGATATACGGCGGTGGGTA
CmoSSR00488	p3	(TGG)7	Cmo_Chr01	3729592..3730618	GAGATATACGGCGGTGGGTA	59.81	ACACATGCCAATAGCTGCAA	60.29	GAGATATACGGCGGTGGGTACGGCGGTGGTAGGTGGTTGGTGGTTGGTGGTGGTGGTGGTGGTGGTCGCTCATCTTTGATTCATTCTGCCTGGTTGCAGCTATTGGCATGTGT
CmoSSR00489	p3	(TAA)8	Cmo_Chr01	3730673..3731702	TCTTCACCCGTCAGTCAAAA	59.26	TGATGACGTCAACGTGGATT	59.97	TCTTCACCCGTCAGTCAAAATTTAGTATCTATAGTTTAAAATTTAATTATTTAATAATTTTCGAGATTATTAAAGAATAGTAATTTATTTTAATAAAATGTATAAGAATTAGTGATGTGGATGCTTTTAAATTTTTGCTAATAATAATAATAATAATAATAAACACGAAATAATTGCCCTAATCCACGTTGACGTCATCA
CmoSSR00490	p2	(TC)12	Cmo_Chr01	3747584..3748613	TTCAACTTGCGGAGGTTTCT	59.85	GTAAGACGAAGGAGCAGCGT	59.64	TTCAACTTGCGGAGGTTTCTACACCTGCACAAATTTATTCAACCCTAATCCTCCATCTTCCTCTCTTACGTCTCTCTCTCTCTCTCTCTCTCTCAACTTAGCCCTAAAAGAAAAATCTAATGTCTGGTATGTACGATCAAGGAGGAGACGCTGCTCCTTCGTCTTAC
CmoSSR00491	p2	(CT)10	Cmo_Chr01	3769814..3770839	ATGGATAGCGCCATTGAAAG	60.06	TAAGGGTTTGGGGTTAGCCT	59.83	ATGGATAGCGCCATTGAAAGGTGCAGTGATATTATTGATACTCATAATCAACGAACCATGGCGCTATCCCTCCTGAGCTTTACAGAGTCTCCCATACTAAACCCTCTCTCTCTCTCTCTCTCTCATTTCTTTTGCTTTCCTGGCTTGGCTGCACACACCCAGGCTAACCCCAAACCCTTA
CmoSSR00492	p5	(ATTTT)4	Cmo_Chr01	3769904..3770929	AGGCTAACCCCAAACCCTTA	59.83	TGACAAAGTCTTCACCTGATCTTC	59.79	AGGCTAACCCCAAACCCTTATTTATAGCCCTAAATTTTATTTTATTTTATTTTATTTATTTAAATTAATATTGAGAAAAAAATAAAAAAAAATAAAAAAAAATCAAGTTAAATTATAATGAGATAATTTGGAAACTAATTTAAGTTGCATTTATTTTTATTTTTTAAAACTATTATTATTATTATTATTATTACCTGTTTAATGCTTTTATATCAAATTTTCCATAAGAAGATCAGGTGAAGACTTTGTCA
CmoSSR00493	p3	(TAT)7	Cmo_Chr01	3770041..3771067	AGGCTAACCCCAAACCCTTA	59.83	TGACAAAGTCTTCACCTGATCTTC	59.79	AGGCTAACCCCAAACCCTTATTTATAGCCCTAAATTTTATTTTATTTTATTTTATTTATTTAAATTAATATTGAGAAAAAAATAAAAAAAAATAAAAAAAAATCAAGTTAAATTATAATGAGATAATTTGGAAACTAATTTAAGTTGCATTTATTTTTATTTTTTAAAACTATTATTATTATTATTATTATTACCTGTTTAATGCTTTTATATCAAATTTTCCATAAGAAGATCAGGTGAAGACTTTGTCA
CmoSSR00494	p3	(TCT)8	Cmo_Chr01	3791454..3792483	TGGTGTCCTCACGAAATGAA	60.09	CAAGAAAATGGCATTGGGAT	59.76	TGGTGTCCTCACGAAATGAACTATCCAAACACTGAGCTGCTGATGAAGTTCATGGGAGAACTGAGGTTTGATGATATATTATTGTAAATTCATCTCTTCTTCTTCTTCTTCTTCTTCTTTGTCTTAATCCTAGAAAGTTGAAACTTCTGAGTTAAGCAGATTTGTTTATTTTGGCCACACATTTTCTTCTGTCGTTCTGTGCAGTTTGAAAACGACAAGTCGTTCTTTTGACCATATCCCAATGCCATTTTCTTG
CmoSSR00495	p3	(AAT)17	Cmo_Chr01	3798017..3799073	TGTGCACAAGAAAGTGTTGGA	60.33	TTCTTTCGAGTTTCCCCTCA	59.78	TGTGCACAAGAAAGTGTTGGAATCAGAACAAATTCAGAAAAATAGAATAATAATAATAATAATAATAATAATAATAATAATAATAATAATAATAATAAAGGAATAAAAATCAGAACGCAACTCGGTATTCTTCTTCTAGTGTCAAAATCTTTGCATTATTTCAAGTTGAGAATTCTCGTCACGTCGATTCTTTTTCTCACGTAGTTTTGAGAGGAAAACGAACTATTCATTGGTATAGAAAACTCTCCTTAACATATTCGTTTTAAAACTGAGGGGAAACTCGAAAGAA
CmoSSR00496	p2	(AT)9	Cmo_Chr01	3818348..3819371	CGAGTTGGAGTGCATGTGTT	59.75	AGCAAAATCGAGACAAAGGAA	58.96	CGAGTTGGAGTGCATGTGTTCGAGAGGGTTCTATGCTCTAAAGATTGAATCCAAAGCATTTATAGCCCAGAGTTTCGCTACACGACAAGGATATTTGTCAATTTGACAATAATAAAACAAAAATAGAATATATATATATATATATTGTTTCCAAGTTCATGGTGTTTATTATTATTATTATTATTATATTTCAAATTTGGTGACTATATTCCTTTGTCTCGATTTTGCT
CmoSSR00497	p3	(TTA)7	Cmo_Chr01	3818386..3819412	CGAGTTGGAGTGCATGTGTT	59.75	AGCAAAATCGAGACAAAGGAA	58.96	CGAGTTGGAGTGCATGTGTTCGAGAGGGTTCTATGCTCTAAAGATTGAATCCAAAGCATTTATAGCCCAGAGTTTCGCTACACGACAAGGATATTTGTCAATTTGACAATAATAAAACAAAAATAGAATATATATATATATATATTGTTTCCAAGTTCATGGTGTTTATTATTATTATTATTATTATATTTCAAATTTGGTGACTATATTCCTTTGTCTCGATTTTGCT
CmoSSR00498	p6	(ATACAT)7	Cmo_Chr01	3836848..3837895	CCATTTCCTGTTGGTGTGTG	59.85	GGGAAGTCCTCTAGTGGGAA	58.17	CCATTTCCTGTTGGTGTGTGTGTGCTCGCATACATATACATACACACACACACCCATACATACATACACACATCCATACATAGATACATGCATACATATACATATACATATACATATACATATACATATACATATATACTTCTTTTACAGAGGTGAAAGATGATCGAGTCATTTTCAAGAAACATGGCACTATATCAATCTGAATCATGAAATTCAATTCCCACTAGAGGACTTCCC
CmoSSR00499	p3	(AGA)7	Cmo_Chr01	3842675..3843701	GTGGCAAGTCGTACATCCCT	60	TGGATTTATAGGAAAGCTCCCA	59.93	GTGGCAAGTCGTACATCCCTATTATAGTCCATCAACAGTTTCTTGTATTCAAATACCTATAAAAGAGAAAGCTATCATTGAAAAAGAGCAAACATTTAAAAAATGCAGCACGATGCATAACTAAAGTCATAATATGACAACAAATAAAATTGGCTGGTAGACAAAATATTAAATAGTTAAAAGAGAAGAAGAAGAAGAAGAAGAAAGCAATCAAATCAAACATTAGACTAGAACTTCAGTTAATTATGCACCCTGGATAGTGTACATAAAAACTTGGGAGCTTTCCTATAAATCCA
CmoSSR00500	p3	(AAT)9	Cmo_Chr01	3846933..3847965	CTGTGTTGCATTCATTCGCT	59.87	AGGTTGCTTCAAATCGTCGT	59.74	CTGTGTTGCATTCATTCGCTGGGAGACGAGAATGCAATTCCAATTTATAGGTTTCAACCCTCATTGAGTTCTAAGGGCGCACAGCTGAAAACTATGTCGGACTCGTATTTCCCTCTTAACGCCAAAGGTTTAATTCTCATTTTTCCCTGCCCTTTTTTAATATTTTATTTCCTTATTTGAACACAAAAAATAATAATAATAATAATAATAATAATTTTAAATGACTATTATCTCGGTCTACCGTCCTTGGGCAATGCCGAACGACGACGATTTGAAGCAACCT
CmoSSR00501	p2	(AT)15	Cmo_Chr01	3856226..3857261	AACAGAGGGTTGCGCTTTTA	59.88	CCGTCTAAAAAGAATACAAGCTACC	58.92	AACAGAGGGTTGCGCTTTTAAATATGAAATATTAATTTGTTTGGGTTTAAATATTTTATCTTTAATATATATATATATATATATATATATATATTTATTTATTTATTTATATTTATATTTATATACTTATTTTTAGAAACCAAATATTTGATTTAAAATATTAATTTAATTTATGAAATATATTTTATATAGCTTAGATTTTTTCTTTTATTTTTATCTTATTTTTCAAGTTAATAGTATATTTTATTTTATTTTTATAATTTAGTTGGTAGCTTGTATTCTTTTTAGACGG
CmoSSR00502	c	(CT)16(AT)10	Cmo_Chr01	3874027..3875084	ATTGATTCGGTACACCCACC	59.53	ATCGAGTCCATTGTCCCAAC	59.79	ATTGATTCGGTACACCCACCCACATCTATAGTGGGTTTACGCTTATGAAATCCATACTTTTCTGGTTTTTTATTTTTTTTTTCCCTCAAATTTTCAACCTTTGAATCTGACCCTCTAAAAAGGTAAGCACCCAGTTGCAAGCAGCTACCTCCTTCTTGGGCTCTCTCTCTCTCTCTCTCTCTCTCTCTCTCTATATATATATATATATATATGTTCTTGGTTTTAGATAGCAACATTCCTCACAAAATTTTCAGAGTTTCTCTTAGTTTGTTGGGACAATGGACTCGAT
CmoSSR00503	p5	(GAGTT)4	Cmo_Chr01	3882057..3883082	AGCAAAATGCAAATCCCAAC	59.94	TTGCGGTTTTCGAGTCTCTT	59.99	AGCAAAATGCAAATCCCAACAAAAACTCGCTTAGAAGTTTCAATGTGATTGATAAAATCAAGTCTAGAGTTGAGAAGTCGTGTCCTGGCGTGGTTTCGTGTGCTGATATCTTGACTATTGCTGCTCGGGATTCCGTTGCATTGGTATGTTCTTTCAGGTCTTGTCGAGTTGAGTTGAGTTGAGTTAGTGTTAATTATTGTTATGATTATACAGCTTGGAGGGCCGTTTTGGAATGTTAAACTCGGGCGAAGAGACTCGAAAACCGCAA
CmoSSR00504	p4	(CAAA)7	Cmo_Chr01	3887641..3888674	GCTTCTGAGACGACGGAAAC	60	TCCGTAACATCAAATCGCAA	60.07	GCTTCTGAGACGACGGAAACAAATTCCTCCACAAGTAGCGGCCGCTGGCCATGTCGACCACCGTCCAGAATCCAGATTGCATAGCCGAAGTCACCTGTTCAAACAATCCACAATCGTTCCATTCAAACAAACAAACAAACAAACAAACAAAGAATCAAACAAAAAGGAAAAAGAAGCCAGAATCAGAAGAAGAACCTTGGAGGAGGTGGAATTGGAAGACAAATCGTTAGAATGCGCATCGGAATTATCCTCGGCTTCGAAATCTTGAGGTTGCGATTTGATGTTACGGA
CmoSSR00505	p2	(GA)20	Cmo_Chr01	3887917..3888962	TTGCGATTTGATGTTACGGA	60.07	GTGGGAAAAGCAAAGCAAAG	59.86	TTGCGATTTGATGTTACGGAGAACGAAGAAGCCGGCAAGAGTCGCAGAGAGAAATATGAGAATAAATCTCAGGGGACACATTTTTTTCAACGCCCTGGCTTCCTCGGTAACCTCTGGATCTGAATGATGGAGAGAGAGAGAGAGAGAGAGAGAGAGAGAGAGAGAGAGATTTTTGAAAATGATTTAGGGTTAATGAAGGGAGTGGTGAGAAGTGATGGAGCTTTCAAAATTGGGGAATATGGACGCCATGGAAGCAAGCTTGCTTTGCTTTGCTTTGCTTTGCTTTTCCCAC
CmoSSR00506	p5	(TTGCT)5	Cmo_Chr01	3888047..3889077	GAATATGGACGCCATGGAAG	60.3	TAAATAAGCAGCCAGCCAGC	60.5	GAATATGGACGCCATGGAAGCAAGCTTGCTTTGCTTTGCTTTGCTTTGCTTTTCCCACCTAACCCAACCACTCATTTTCTATTAAGGGATATTAAATAATTATCAGATAAGGTTAGAGTTTGGGTTACTGGTAACCCACAACCATCATATTTTATACCAAAATAAATAAATAAATATAATAATAGTGGCTGGCTGGCTGGCTGCTTATTTA
CmoSSR00507	p3	(TGG)8	Cmo_Chr01	3902938..3903967	TGGATGGCTGTGTCAAACAT	59.97	TAGAATCAATGGCCTCCGAC	60.04	TGGATGGCTGTGTCAAACATTGAAGCACAAGAAATAGGTTTTAGGTTCAACACAGTTGTGTGTGACTTTTGTGCATTCAACATAGGCAGTTTTACAGAGCAGAAAGCACATAACTACTGATGCAATCTATGGTGGTGGTGGTGGTGGTGGTGGTATCTCACACAGTTAAACACAAGTTCACCTACTCACTCCAATACCCCTCCATTTTCCAGTAAACGGTCAAGGAAGTGTCGGAGGCCATTGATTCTA
CmoSSR00508	p5	(CTTGG)4	Cmo_Chr01	3911343..3912368	ATGTGATCCCAGAATCGGAG	59.89	AGATCATTCACAGCAAGGGC	60.23	ATGTGATCCCAGAATCGGAGACCCAGATGGTGGGTGGCGGAGTAGTATCCAGTGGGCGTATGGGATACACAAATTTGGGTGGAAGAAACGGAATGCGACACAGCGCGCAATGGAAAAGAAGAAATGGAACGTCAAACCTCACCGCGTTGATTTGTGAAAAAGTCTCGGTTTGTGGGTTCGCGGACGTCGTTTTATGGGGGGAAACAGAAAGCCTCCCTCTTCCGCTGTGCCCTTGGCTTGGCTTGGCTTGGCCTTCCCCTCCCCGCGCTTGCGCCCTTGCTGTGAATGATCT
CmoSSR00509	p2	(AG)10	Cmo_Chr01	3930687..3931712	AGCGCTGAAGTTATTGGGAA	59.85	ACTGGACGCCAAGAAAGCTA	60.02	AGCGCTGAAGTTATTGGGAACAGTGCAGTGAGGGTTATTTTTATGCTTAGAGCTCAAGTTGCTTGGATTTTGGAGGCAGAAAGAGGTCCAGTTTCATTAAATCTATTGACCATGAGCATTAATCAGTTGAATCAAGAATGAATACGCATGAAGAAGGAAGACAATGGAGGAAAAGAGAGAGAGAGAGAGAGAGACCTCTTGGCGCGCTTGGGATCAAGAGTCCAAAGCTCAGCTAGTTTATCAGGAGGCATAGCTTTCTTGGCGTCCAGT
CmoSSR00510	p5	(TCAAC)5	Cmo_Chr01	3947656..3948686	TTTCAAAATGAGCCGTGGAT	60.45	TTCGTACGGTTTGGATGAAA	59.01	TTTCAAAATGAGCCGTGGATCTAGTTGAATCAACTCAACTCAACTCAACTCAACGGTCAGTTCGAGTTGTTACTGTCATTTATACAAATTTTTGTTTTTAATAAAATTTTAATAAATTTTGCAATTACACTCCAAAAACTTAAAATTTAATTTTAAAAGTGGTTGAAAATAAATAATAAAACATAAGTATAAAGTTAAATAAAATTAAAATAAATATAAAAAATGTACTTTTATTTGTACTCATAAATTTTTTTTTCATTTATTTGAGCCGAATTTATTTCATCCAAACCGTACGAA
CmoSSR00511	p8	(ATTAATGA)3	Cmo_Chr01	3961484..3962513	CGCTGCAATCTGAAACTGAA	60.13	TCCGATTATACCCTTCTGGC	59	CGCTGCAATCTGAAACTGAAACTGAAAAAATGCGATCAGAAATCGAGGCGGCAGCAGCGGCAGTGCAGGGTGTTGGTGCAAGCGGTGGGGCGGGGCGAGGATTCGGCTGGTACAACTCTGGTCCACATTGCAACCTTCCCTCGTCTTCTCCTTTAATAATAACGGTATTAATGAATTAATGAATTAATGAATTTAATTAATTAATTATCATTTCCTAATGTGATCATGGATTTGAAGCCAGAAGGGTATAATCGGA
CmoSSR00512	p3	(CTT)7	Cmo_Chr01	3969453..3970479	TGTCAACAGACTCGTCAGCC	60.03	TTTTGTGGAGTTTCCTTGGC	60.09	TGTCAACAGACTCGTCAGCCGGATCCTGAATTACAACCTTCTTCTTCTTCTTCTTCTTAGTTGGATCAAAGGGTGCAATCTGCAAGGAATAAACCATACACATTCATCATGGTGTTGCACCAATACTTGCACATGAACAATGGTTCAGAAACTGCACTAGATTACAATTACTTAAATGTTTGGATAAAGACACATGGTAAGATACCAGCCAAGGAAACTCCACAAAA
CmoSSR00513	p4	(AAAT)5	Cmo_Chr01	3974996..3976021	ATATTGGGGGATCAGCTTCC	60.12	GCAAATTGTGAGACGGGTTT	59.98	ATATTGGGGGATCAGCTTCCGTGTGAAGGTACAGAATTCCCTTAGCTGCACCCAGGGCAGCTTTTAATCTTGTGGCAAAACTCAAAGGTTTTGCAGAACGTACTGTGATAACACAAGGAAGCATAACAAGTCAATGCTCAAAAGAGGGACATGAAAACAACAGCTCAAATAAATAAATAAATAAATAATTTATTCTTCAGTTGACATAAATATGAAGGAATAAGAACCCTGGAACGTATAAAAACCCGTCTCACAATTTGC
CmoSSR00514	p2	(TA)10	Cmo_Chr01	3989670..3990695	TAGAGCTCCACTTGCCACCT	60.01	ACACACATGCAGGCTAGACG	59.93	TAGAGCTCCACTTGCCACCTTAATCACATCTCTTTTAAGTAAATAAAAGTACCAATTCAAAATTATGCTATTTATTTTATATATATATATATATATATGATTCTATCAGGTTAATTGAGTTCTCCTCAGACACAAATTTCTAACTTGTTCTAAGGATGCTGGCTATTGTAACACCATTCCTATCATTCTAACTTTAACTGAATTGGAAATTAGATTCGTCTAGCCTGCATGTGTGT
CmoSSR00515	p3	(TGG)7	Cmo_Chr01	3993026..3994052	AGAAGACGAAAAGGCGATGA	59.96	CTCGCCCTCATGGATAAAAA	60.03	AGAAGACGAAAAGGCGATGAAGGAAAGGTAGCTGGTGGTGGTGGTGGTGGTGGCGGTGGTGGCGGTGGCGGCGGTGGATGTACAGATCACCAAAGCAATAGTTGTAGACATTTTAGTTCAAAATTTTAACGCGTAGCTGATGACGACTAAACCCATCCTTTTCATGCACTCCGTCAAAGTCATACAAAGATAAAAGATATCAACTAGAAGGTCAAAGTGGGTATTTCACTTGTTTTTATCAATTTTAGTTGACATTTTTATCCATGAGGGCGAG
CmoSSR00516	p3	(TTA)7	Cmo_Chr01	3996956..3997982	GGGTCGGTTTCACTTAGGGT	60.23	AAAGCTTTCCCGTCCTCAAC	60.61	GGGTCGGTTTCACTTAGGGTTTATCCAATTTTTAATTAAAAAATGTTGAAATTTTCGTGGTTACGAGACCATTAAGATATAGTTTTGACAATTTCAAGAAAATTAAAGTAGGGTTGATTTTTATTTAACATTATTAGTAATAGTAATTTTTATTTTTATTTATTTATTATTATTATTATTATTATATATATTTTACAAGTTTATGAGTATTATTGAAAATTTTTCAATAATATTCTTTTTAGAGAAGCCTATAAGGCAGGTTGAGGACGGGAAAGCTTT
CmoSSR00517	p3	(TTA)9	Cmo_Chr01	3998227..3999259	TCACCACCACTGTTATTTCCTTT	59.79	CACTCTTTTAATCTGGAAAAACGC	60.49	TCACCACCACTGTTATTTCCTTTTCTTTTTTAATTTTGTGTTGATAATAAAAACATTAATTATGTAGTTATTATTATTATTATTATTATTATTATTTTGTTAAATGACTAATTGTTTAGTTAAGAAAATAATAAATTTGAAAATAAATTTAATAATTTTATCTTATTTATTAAATGACTAATTATGGATTTTGTTTTTATTTTAAAATATTTAAATCATATTATGCGTTTTTCCAGATTAAAAGAGTG
CmoSSR00518	p2	(TA)13	Cmo_Chr01	4002696..4003727	CTTTTGGTGGTGGAGAACATT	58.94	GGTTGGGTTGTAATCTTATTTTCG	60.01	CTTTTGGTGGTGGAGAACATTCTCTCCCTCTCTTTTTATATTATATTATATTTATATTATATATATATATATATATATATATAAATAAATTAAAAACAAAATTTTTTATATTATGATAATTTTAAAAAATCCTTAATGTCCCTACTTATCTAAATGAGATACTAAATGAAAAAGAAAAAGAAAAATATCTTCTTTAATGGAAACAAAACTTTATTATATTTGAAATATTAATTTATAATATAACATCAATTGAGATTTTTTTTAGTCGGGTTAACTCGAAAATAAGATTACAACCCAACC
CmoSSR00519	p6	(TCTTCA)4	Cmo_Chr01	4009407..4010436	CGACACAATAACTTGCCCCT	59.99	TTGTCAGTGCTTGGAACTCG	60.02	CGACACAATAACTTGCCCCTTCTTCGCTCCATGAACATCATTCCCAGTGCTCAAACAAATTCAGATTCAGAATTCCCGAGAGATTCTTCATCTTCATCTTCATCTTCATCTTCCAATTTGAACAATGACTGATAACAATCATGTCGCCATTCAACTCGATCGAGTTCCAAGCACTGACAA
CmoSSR00520	p2	(TA)17	Cmo_Chr01	4017521..4018560	ATAAACGCCAGCCATCCATA	60.31	ACCTGAGGGCTGAGAGAACA	59.99	ATAAACGCCAGCCATCCATATGGCAGAGTGTTGCAAACTGACTTCTGCTAGACACACAGTTTCAGAGTTAATTATATATATATATATATATATATATATATATATATTATTTTCTTTTTACCATATGAAACTGTGCATGGTAAATAACCAAAAGCAGTAAAAGATGAAAATATGGAATTATGTGGTGGTTGAGAAATATATTATAACATTTTGCTTGGACAAGATATTTTGCAAAGATACTTCGATAATCAACTTGGACATCACGTAATCGTGCAAATATTGTTCTCTCAGCCCTCAGGT
CmoSSR00521	p2	(TA)9	Cmo_Chr01	4032698..4033721	CGTGACACATGGTTAGTCGG	60.02	GTTTTGGGTTAAGCTTGGCA	60.11	CGTGACACATGGTTAGTCGGTATGTGCGTATATATATATATATATATTTTTTTGGAGTTATGTTTATTGTTATTTATTTATTTATTTATTATTAGTAATTTCTAGTATATCCCTGTTTTTATTAATACAAAAACCCTGAATCCTGATCATCCTCCTCGTGAAGGCCTGCGCTCCACCTCGAGCAACAATGGCACTTATTTGCAGTCCCTGCAGTGCCAAGCTTAACCCAAAAC
CmoSSR00522	p4	(TTAT)5	Cmo_Chr01	4032739..4033764	CGTGACACATGGTTAGTCGG	60.02	GTTTTGGGTTAAGCTTGGCA	60.11	CGTGACACATGGTTAGTCGGTATGTGCGTATATATATATATATATATTTTTTTGGAGTTATGTTTATTGTTATTTATTTATTTATTTATTATTAGTAATTTCTAGTATATCCCTGTTTTTATTAATACAAAAACCCTGAATCCTGATCATCCTCCTCGTGAAGGCCTGCGCTCCACCTCGAGCAACAATGGCACTTATTTGCAGTCCCTGCAGTGCCAAGCTTAACCCAAAAC
CmoSSR00523	p2	(AG)12	Cmo_Chr01	4064077..4065106	AGCGGACAAGATCTCAGGAA	59.95	GCTGCTTGGGCAAACTTAAT	59.37	AGCGGACAAGATCTCAGGAAAAAGAGAGAGAGAGAGAGAGAGAGAGTTTTGTGGTTCAACACAATAAAAGCTTTGTTTTGGAGAATTTTGGTAGAAGGAACCAAGATTTTCCAAGAAATAAGTGTTTTTCTTGGAAGTAAAGAAGGAATTAAGTTTGCCCAAGCAGC
CmoSSR00524	p3	(ATT)11	Cmo_Chr01	4103941..4104979	CAGTAGCGTTGGATCTGGGT	60.13	TAATTGTTTGGTGTCGGCAA	59.97	CAGTAGCGTTGGATCTGGGTCGTTACCGACCCAAAATTTATGTATATATAATTGTATAGGTAAAAATCAACGAATTTCGGTTCAATCCAACCGGTCACATTTCATCAAAACTTACCCCACATGTTTAAAGCCTCTTACGTGGCCACATTATTATTATTATTATTATTATTATTATTATTTATTTATTATTTTTTGCCGACACCAAACAATTA
CmoSSR00525	p2	(AT)14	Cmo_Chr01	4104025..4105058	TTGCCGACACCAAACAATTA	59.97	CTTGGCCCAATAGTCAGGAG	59.69	TTGCCGACACCAAACAATTAATATTTTAGGTATAAATAATATATATATATATATATATATATATATTGGTTAAGGCAAGTGGGCCACATTGAGCAAGACTTCTCCTGACTATTGGGCCAAG
CmoSSR00526	p6	(GATTCG)4	Cmo_Chr01	4106328..4107357	GATCCAATCGAGAGCTGGAG	59.91	CAATAATGGCTCACCACACG	59.99	GATCCAATCGAGAGCTGGAGTTTGATTGAAGAACACCCTTTGTTTCCCTCTACAAGATTCGGATTCGGATTCGGATTCGAATTCGAATTCGAATTCGACCCAGTTGAGAGTTTGAGGTCTAGATTGTGATCGTGTGGTGAGCCATTATTG
CmoSSR00527	p4	(ATTA)5	Cmo_Chr01	4110939..4111964	GAGAAGGTTGGGGAAGATGA	59.06	CGCGTAATTGCGGAAAGTAT	60.12	GAGAAGGTTGGGGAAGATGATTACACATGCGGATCCATGCCGGACCGAATCACTCCCCCATCATCTCCCCCATTTCTCTATTAATTAATTAATTAATTAATTTATTTATTTCATTTCTTAATTTTAATTAATTATTTAATAGCCAAGAATTAGTTTAAGGATTTAGAGAGATAGGTAGGGACAACACAGATTTTGTACTACATGATACAAATTGGAGGGTATAAATGTAATAATACTTTCCGCAATTACGCG
CmoSSR00528	p3	(AAT)9	Cmo_Chr01	4114257..4115289	TGACCATGTGAGTTCGGAGA	60.25	CAACTTTTAGGCTTTTGTCTGG	58.13	TGACCATGTGAGTTCGGAGATTCATATCTTAACATTAAAAAAAAAAAAAAAAAATTAAAAATTACGTAAAAATATTTTATTTTTGTATCTAATAATTATTAAAAATCAGATATATTTTTATTTTGTCTATTTTATGATATTGAATAAATTTAAAAATATGATTTAAAATTAATAAAAATGAAAATATAATTAAGTTGATTTTAAAATAATAATAATAATAATAATAATAATAAAAGAAACCAGACAAAAGCCTAAAAGTTG
CmoSSR00529	p2	(TA)9	Cmo_Chr01	4115519..4116542	GATTCTTCCAACCCAACACG	60.35	ACAGGTTGATGCCCATTCTC	59.93	GATTCTTCCAACCCAACACGTATACACGCCTGAGAGACAAAATAAAATGAAATTTAAACTTAAATTTTTCTTTATTAAAGTACGATATTATATATATATATATATAATAAAATGATTTCTCTAAAGCTAAAGAATACACGAGAGAGAAGAAAAGACAACGGTGAAATTGGAAAAATCAAGTGGAAGAGGTCTCCGTAGGTTGGGCCTCGACCTTTTGGGCCTGTGGAGAATGGGCATCAACCTGT
CmoSSR00530	p5	(CCAAA)4	Cmo_Chr01	4136410..4137435	ATTTACCCACCGGATCTTCC	60.02	AGACGTTGAAAGCAGAGGGA	59.99	ATTTACCCACCGGATCTTCCTTGAAGGCTTTGAGCAATGGCGTTCCAGTTATGAGGGCCATGTCGCTCCACCAGCTCCTGCAGCTTGTGGTCTTCCGCAGGGCGCCAGTGACCTCTACTGTGTGTCACGGTCATGCTCGTCTAGATCCAGAAGGGATTGCCTTCCTTCCTTCCCTGATCTAACAATTAATAAGAAATCCAAACCAAACCAAACCAAACGCACAGCTTGGCTTGGCTTGGTTGCTTCCTGCGCTCAATTTCCCTCTGCTTTCAACGTCT
CmoSSR00531	p2	(AT)9	Cmo_Chr01	4137423..4138446	GCTTATAGCAACCCCCATCA	59.92	CGTTCACTCCACTTTTCTTGG	59.76	GCTTATAGCAACCCCCATCATCTAATACAAAATAAAACAAAGCAAACTGTGGGAATATTAGGTAACAACAAACCCTCACTCTCTCTCTATACATATATATATATATATATCTCGAAACCTCGTACCTAATTTATTATATCCATTTTTGTGTAAATTAATAATATTTATTCTTTTATATCATCCAACAAAATGCTTTTTTGTGGTGGTTTTTAAAAATTGATTAAATAATAACAAAAATAAAAACATGGTTAAAAATGATATTTAACAACTTCCAAGAAAAGTGGAGTGAACG
CmoSSR00532	p5	(AACTA)4	Cmo_Chr01	4137856..4138881	TTGCCTAAACCAACCAGACC	59.97	TCGGTTGCTGAACTGTGAAG	60.02	TTGCCTAAACCAACCAGACCTATCAACCATTTGACAAGTCGTCTCAAAACGGATACCAACTAAACTAAACTAAACTAAACCACCTGCTTCACAGTTCAGCAACCGA
CmoSSR00533	p2	(AC)10	Cmo_Chr01	4158462..4159487	TGGTTCAGCACATTCAAAGC	59.85	CCACCAAATCAAAACAGCCT	59.97	TGGTTCAGCACATTCAAAGCCCACAGCTAACCCCCCCAGATTCAAAACTCCCACATTCATCAATGTATCAATGTTACCGCAAGACAAGACACAAACAGTTGCAACCAAAACACACACACACACACACACAAAAAAAACATAACAGTGTTCAGCTGGATATGCCACTTCTCAGGAGGAGCTATGACAATTTAAGGCTGTTTTGATTTGGTGG
CmoSSR00534	p5	(AGAAC)5	Cmo_Chr01	4161400..4162430	TCGGAGGAGGAATCATTGTC	60.01	CTGTACACCTGGGCCTCATT	59.99	TCGGAGGAGGAATCATTGTCCCAACCACCGCCGCCGCCAGTGCCGAACTCCATTGGGTAAATGCGCGTTTTCCGTTTCACTATCCACTACACTACAACCAAGGAAGAACAGAACAGAACAGAACAGAACAGGGGGGAAAAAGGCACCAATCCGCCGCCCCCCTCCGCCACTTCCGCCGCCCCCGAATCCCGAAACACGAGGTGGGTTGGTCTGAAATTAGAAATTAGAAACTGGGAAATGAAGGAAAGAGATATATAATGAGGCCCAGGTGTACAG
CmoSSR00535	p2	(AT)9	Cmo_Chr01	4163151..4164174	TCTTGCCGGTGGAAAATAAA	60.43	TTCCAACGTCACTGACAAACA	60.18	TCTTGCCGGTGGAAAATAAATTGCATATAAATGAGTAAATGCATTATTTTATTTTCATAAATAATGGAGTATCAATCGAAGATATATACAGAAATTATGGAATAATAATTCAACATATAATATATATATATATATATTATTGAAAAATGTTTCATAAATAGCTGAAATGTTTGTCAGTGACGTTGGAA
CmoSSR00536	p3	(TTA)11	Cmo_Chr01	4163378..4164416	TGTTTGTCAGTGACGTTGGAA	60.18	TAAGCAGAACGATGCAATCC	58.87	TGTTTGTCAGTGACGTTGGAAATAGATTTTGTTGTATTTTTTAGAGGAAAAAAAAAAGTTACAAATAAATGAAATATTTTATTTAGTACAAATGGAATTTTTATTATGAAATTGGAATATTTTGGTCATTTCACTAACTTATAGGTTAATTAAGAGACCAGTAATAGAGGTTAAGACTTTTATTATTATTATTATTATTATTATTATTATTATTCATTTAATTCTATCTGGATTGCATCGTTCTGCTTA
CmoSSR00537	p2	(TA)10	Cmo_Chr01	4164124..4165149	TGAGAGGTCATCGAGAACGA	59.5	GCTGGCCATTACACTTTACCTT	59.57	TGAGAGGTCATCGAGAACGAGTATTATATTCAATATTCCCGTCTCTGCTATATATATATATATATATAATTATTAAAATTTATTAGAAAAATTAAATTATTAGATATTTGCAAAATAACTCAAAAATTATATTTGGACCATAAATTTAATGGGGAAAAGGTAAAGTGTAATGGCCAGC
CmoSSR00538	p2	(AT)13	Cmo_Chr01	4164894..4165925	GTCGGGTCAACCCAATTAAC	59.15	CGGCTCTAAACCCTAAACCC	59.96	GTCGGGTCAACCCAATTAACCCACAAATAAAGTTACGACTCTATCCTACTTCTCGGACTACTATGAAAGTTTAAAATATTTGAAGTTTGTAACTGATATTTAATATTTGAATTTTATGAAATTTTAGTTATTGATACAACATGTAACCGAGATAAAATTATAAATATAATTTTGTAAAATATATATATATATATATATATATATAAATAAAGATCAACTCAACAAGTTAACCCAACCAAAGGTTGAGTTTAGGGTTTAGGGTTTAGAGCCG
CmoSSR00539	p5	(CCAAC)5	Cmo_Chr01	4165642..4166672	TTTCGAGTAACCCGACCAAA	60.47	AGCTTTTCTACGCCGCATTA	60.01	TTTCGAGTAACCCGACCAAATTTTCTGATTTAAAAAAATTCAACCCAAACCAAACCGGAAAAAAATCCAATCCAACCCAACCCAACCCAACCCAACCTTTGTAGTTTTAGTTGAGTAAACCAGATTGATCGGGTTATCGAGTCATTTTAAATAGTTTAATGCGGCGTAGAAAAGCT
CmoSSR00540	p2	(AT)10	Cmo_Chr01	4167096..4168121	TTTCAAAAAGGCTGTGAGAGAA	59.13	ACCTGAAACTTGCCACTGCT	59.91	TTTCAAAAAGGCTGTGAGAGAATAAAACAATGATGAAATTAAAACAAATATATATATATATATATATAATTCCGTAGGAAAAAAGAAAAAATATATATTTTAAAAATAACTATAAATTTAAAATAGTGATTAAAATTTTTGAGAGTGGAAGAGTAATTTTAAATCATATTTGCAATAATTTAGGCTTAAAAAAAATGATTATTTTATTTTATTTTATTTTTTTATTTTTTTAAATAACGATTTTGATGCCATTTCCAGCCATTTGGTGCGGAATGTTGAGCAGTGGCAAGTTTCAGGT
CmoSSR00541	p5	(TTATT)4	Cmo_Chr01	4167247..4168272	TTTCAAAAAGGCTGTGAGAGAA	59.13	ACCTGAAACTTGCCACTGCT	59.91	TTTCAAAAAGGCTGTGAGAGAATAAAACAATGATGAAATTAAAACAAATATATATATATATATATATAATTCCGTAGGAAAAAAGAAAAAATATATATTTTAAAAATAACTATAAATTTAAAATAGTGATTAAAATTTTTGAGAGTGGAAGAGTAATTTTAAATCATATTTGCAATAATTTAGGCTTAAAAAAAATGATTATTTTATTTTATTTTATTTTTTTATTTTTTTAAATAACGATTTTGATGCCATTTCCAGCCATTTGGTGCGGAATGTTGAGCAGTGGCAAGTTTCAGGT
CmoSSR00542	p4	(AATA)5	Cmo_Chr01	4184405..4185430	TTTGCATCTAGATTGAGTCGGA	59.85	TTTCCCCATGCCTAAAAGAA	59.52	TTTGCATCTAGATTGAGTCGGATAAATCTTTTTAGATGATTCAAAATTATGAATTAATATAAAATAATAAATAAATAAATAAATAGAGAGTTATTTATTTGGAAAGTTAGAAAGTTTTAATTTATTATTTATTTATTTATTTATTTATTTAGAGTTGAATGGATACTTCTTTTAGGCATGGGGAAA
CmoSSR00543	p4	(TTAT)6	Cmo_Chr01	4184464..4185493	TTTGCATCTAGATTGAGTCGGA	59.85	TTTCCCCATGCCTAAAAGAA	59.52	TTTGCATCTAGATTGAGTCGGATAAATCTTTTTAGATGATTCAAAATTATGAATTAATATAAAATAATAAATAAATAAATAAATAGAGAGTTATTTATTTGGAAAGTTAGAAAGTTTTAATTTATTATTTATTTATTTATTTATTTATTTAGAGTTGAATGGATACTTCTTTTAGGCATGGGGAAA
CmoSSR00544	p3	(GAA)7	Cmo_Chr01	4184771..4185797	CGTCTTCTACCGAGGAGCTG	60.15	AATGAACGAACCTGGCAATC	59.94	CGTCTTCTACCGAGGAGCTGAAGAAGAATGTGGAGCATCATGAGAAGAAGATGGTGATGAAGAAGAAGAAGAAGAAGAAGGAGAGATTGGGGTGGATTGAATGGTTGAGAGGTTGGATGTATGTCATTCACGAGATGCTATTTCAGAGAATCGTTGCCAGCCATCTCCAGAATCCTATGCCTCTCCCTCCCATTAACGACCTTACTTGCATTGTCACCGGATCGACCAGCGGTATTGGCCGCGAGATTGCCAGGTTCGTTCATT
CmoSSR00545	p2	(CT)12	Cmo_Chr01	4190793..4191822	TCCACTAGCGTTGTGTGCTC	60.06	GATTTGGTACCTGCTGCGAT	60.1	TCCACTAGCGTTGTGTGCTCTGCAATTACCACCGGAAAACGAGGATGCCGGTTCTTAAAATCGGAACCTCCTCTCTCTCTCTCTCTCTCTCTCTATCTGTTTTCATTACTTTCAAATTATTGCTCTACCAAACAACCGAACGAAGCTACTCTTATCATTTGATTCAGCACTTGAATTGAATCGCAGCAGGTACCAAATC
CmoSSR00546	p3	(TTC)7	Cmo_Chr01	4205908..4206934	ATACACTTCTCCGACACCGC	60.14	GAAGATCTTGTCAGGCGAGG	59.95	ATACACTTCTCCGACACCGCCATCTGCACCATCCGCTGACAACAAAATCTCTCCCACGTCCGTGGGGTTCTCGTCGCCTTTACTTTTACCTTTCTTCTTCTTCTTCTTCTTCTTGTCAATAGCCTTACTGCGGGAGGCTAGGACTCCTCCCTTGAAGGTGAGCCTACCTCCTTTCGCCCCTGCAAATGGATCCGACATCGTAGCGCGTCTTCACTGTCCTTTGAAGTCAGTCCCTCGCCTGACAAGATCTTC
CmoSSR00547	p5	(AACCA)4	Cmo_Chr01	4208180..4209205	TAAACTGGGTTGAACCAGCC	59.97	GGAGGGAGAAGCACAACAAG	59.84	TAAACTGGGTTGAACCAGCCAAAATGGTAAAGAACCGAACGAAAAATAGGCTAAATTGATCGATTAGGGGTCGAACCGGTTAGAACCGAGGCTAAACTGGTCAAAATCAACAAACGTCAATGGGTTGAGCGAGAACCGATTAGGATCATATCGAACCAAACCAAACCAAACCACACGAACTAGATGAACTTGTTGTGCTTCTCCCTCC
CmoSSR00548	p2	(AG)14	Cmo_Chr01	4225651..4226684	TCTCCACCCATACCTTCCAA	60.31	TGTGGGCCGATCATTTTACT	60.33	TCTCCACCCATACCTTCCAATTATGGAAAACATAAAAGAGAGAGAGAGAGAGAGAGAGAGAGAGTGGGGCTGATACCAATATTTAGAGAGAGCCCCATTTGAGTAGGACGGATACTCTGATAAAAGCCACGCCAGCTTTCCAGCCCCTCACCCAGTGTCTGACGTCTACCAAGGTTTGGAGAGTAAAATGATCGGCCCACA
CmoSSR00549	p5	(TTATT)4	Cmo_Chr01	4228490..4229515	TCACCTGCTTTTGGAAGGAC	60.23	CACTTACTGGAAGGGACCCA	59.96	TCACCTGCTTTTGGAAGGACACCCTATAATCCTTCCCACACCCTACATATAAAAGCACCCGGTAGGTCTTCGAAAAAGACAACTCCATTCCTCTCCTCTATAAATTATTATTATTTTATTTTATTTTATTTAAATAAATAAATCCGCATGTTAAAACAATCTTAATTATTGCCGATAACCCCTCGTCCGTCCTCCGTGGCATATTTCAACACTCTCACTGGTTTACCTTATTACGTGGCAAGTCTCTTCTTTTGCTTACGTGTATTTTCCAGGTTGGTGGTGGGTCCCTTCCAGTAAGTG
CmoSSR00550	p5	(AAAAG)4	Cmo_Chr01	4235901..4236926	GGCTGACGGCGATATGTAAT	59.95	CGCCATTGATTCCTTTTGAG	60.58	GGCTGACGGCGATATGTAATGGGCTGAAGTGGACAATATCTATTAAGAGAGAAATAAAGGGCTTGTGTGAAACGTTTGTCCAAGAATCTACAAAAGAGAAAGGGAGAGGGAGAGGCCAAAAAACAAAAGAAAAAGAAAAGAAAAGAAAAGAAAACGATCCCAAAGAGAAGAAGTTACTTTGAATCCTCTTTTATATATAGGGAGTTTTAACGATGTGGGGAAAGAGTTCTCAATCCACCAATTGGTTACCAACTCAAAAGGAATCAATGGCG
CmoSSR00551	p6	(CCCCCA)4	Cmo_Chr01	4248713..4249742	TGGAATCCTCCAGAAAGTGG	60.04	TTGGGATTTATCCATTCACCA	60	TGGAATCCTCCAGAAAGTGGTTCTCAATCTTGTGGCTGAGGATTTTCTTTGCCACGTACACGCGTCACTCTCCCGCCCCCACCCCCACCCCCACCCCCAACCCTTTTTCAATTTCCACAGATATTTAAGATAATATATTTGTGGAAGAAATTGAATGGTGAATGGATAAATCCCAA
CmoSSR00552	p3	(TAT)18	Cmo_Chr01	4248821..4249880	CCCCAACCCTTTTTCAATTT	60.03	TTGGACGCAGAAATAGGGAC	60.07	CCCCAACCCTTTTTCAATTTCCACAGATATTTAAGATAATATATTTGTGGAAGAAATTGAATGGTGAATGGATAAATCCCAAATTAACCTATTATTATTATTATTATTATTATTATTATTATTATTATTATTATTATTATTATTAATATCTCAAAAATAGATATTTTAGTGATGGAAAATCACTTAGGTATTGGAAGCCTTTTCTTTTCTTCCACCAATCAGACTTTTTCTTTTTTCTTTTTTTAAATTTGTTTTTCATTTTCAGTGTGTCCCTATTTCTGCGTCCAA
CmoSSR00553	p5	(TTTTA)4	Cmo_Chr01	4250656..4251681	AAACCCACTTTTCGCCTTTT	59.98	TGGTTGTACCAAGTTATGGTGTG	59.7	AAACCCACTTTTCGCCTTTTCCGCTTTTTATTTTATTTTATTTTATATTTTAATTATATATACACAAACCTTAAATTTTTAATTATATAAACAATCCGAATTAATTTCACACCATAACTTGGTACAACCA
CmoSSR00554	p2	(AT)17	Cmo_Chr01	4297748..4298787	AACAACAGGCTTGGAAAAGAA	58.87	CATGTGCTAAACTTCATGCGA	59.89	AACAACAGGCTTGGAAAAGAATTAAACCGAGAGAGGTTTGAAAAGAATTAAACAGAGAGAGGTAAAGAAATATATATATATATATATATATATATATATATATNNNNNNNNNNNNNNNNNNNNNNNNNNNNNNNNNNNNNNNNNNNNNNNNNNNNNNNNNNNNNNNNNNNNNNNNNNNATATATATATATATATATATATATATACTCAATACTCATAAAGTCTTTAATGCTCGCATGAAGTTTAGCACATG
CmoSSR00555	p2	(AT)13	Cmo_Chr01	4297857..4298888	AACAACAGGCTTGGAAAAGAA	58.87	CATGTGCTAAACTTCATGCGA	59.89	AACAACAGGCTTGGAAAAGAATTAAACCGAGAGAGGTTTGAAAAGAATTAAACAGAGAGAGGTAAAGAAATATATATATATATATATATATATATATATATATNNNNNNNNNNNNNNNNNNNNNNNNNNNNNNNNNNNNNNNNNNNNNNNNNNNNNNNNNNNNNNNNNNNNNNNNNNNATATATATATATATATATATATATATACTCAATACTCATAAAGTCTTTAATGCTCGCATGAAGTTTAGCACATG
CmoSSR00556	p2	(AT)14	Cmo_Chr01	4304536..4305569	CCGCGTAGGAATAAGGACAA	60.09	CCCGTCCTCTGTCAACATTT	59.97	CCGCGTAGGAATAAGGACAATTACTTTTGTAACCGACCATTACTTCTGTACTAGATGTGTTTACTTTTGTAACCGACCATTACTTCAGTACTAGATGTGTGTTTTCAACGCACATTTGACATATATATATATATATATATATATATATACAAATATACGTGTAGGTTGGATATACAAATATACCGCAGTAGGTTGGATTCTGATGGTATATTATTCTTAAAAAAATGTTGACAGAGGACGGG
CmoSSR00557	p8	(ATCTTGTA)3	Cmo_Chr01	4333845..4334874	ATCCGTCCGGTTATTCTTCC	60.15	GAATCAAGGAAGAGGTGCCA	60.2	ATCCGTCCGGTTATTCTTCCTATTCTTGTGAACGCAGTTGGTTATCTTGTAATCTTGTAATCTTGTAATCTTCTATCTTATACTATTCCTCCTTTTATTCAATTTTCTTTGATTCTCCTTGTTCAATTCCTTCCCCAATTTATTTACAATCAGATTTTGAATATTCTTCAATCCAATTCGTTGATTAATCTTCAAATGGCACCTCTTCCTTGATTC
CmoSSR00558	p8	(ATAAAAAA)4	Cmo_Chr01	4343336..4344373	GGTCAATGGATGTAGCGGTT	59.82	TTTTGCATTCTCCCTAGTCCA	59.69	GGTCAATGGATGTAGCGGTTGAATTGTTATATAACATAAAATTTAGAAATCAAAATGAAAATTTGTTTCACTCATCACAACAACAATTAATTGATTGCGTTAAGTTTAAATAAACAAAATTTTCGAGAACGTTACCTTTGCAATATCAACAAAACTTTTGAATGAGTTATAAAAAAATAAAAAAATAAAAAAATAAAAAACTGACAGAAGAATGCAATAAAATGAACTAAAAAAAAATGGTAGGAGGAGTTGATTATCTATACATGGACTAGGGAGAATGCAAAA
CmoSSR00559	p2	(AT)16	Cmo_Chr01	4353477..4354514	GAAGACCGTAGAGTGGCAGAA	59.49	TTTTCTCGTTTACTTGCGGG	60.24	GAAGACCGTAGAGTGGCAGAATATTGTTAACAAAATCAAAAGAAAAGACAAATATATATATATATATATATATATATATATATAGGAGGCCAAATACGATACGTTAACAAAATCAAGAGAAAAGACAAATATATATATAGGGGGTGAAATACGATAAACAAAATAAAAAAGTATGAGAGAAAAGTAGAAATGCAGGTAAAAGAAAAAAATAAATAAATAAAGAGAGCCCGCAAGTAAACGAGAAAA
CmoSSR00560	p2	(AT)9	Cmo_Chr01	4362175..4363198	GCAACCCGAGCTACAATGAT	60.1	CATTCTCCGTTGTTCCGAAT	59.93	GCAACCCGAGCTACAATGATGACTTCAAATTTTAAATTTTGTATAGATTAGGATATTTTTTTTTTAGATCAAAGAGATTTCCCTTTCCATTTATTATTATTTATTTTACATATATATATATATATATAATAAGTGAAAATATTTTTTAAAAAATGTTTAATAAGGCGAGAAAATAGAAAGTTTGAATGAAATTCGGAACAACGGAGAATG
CmoSSR00561	p8	(TTACTTTT)3	Cmo_Chr01	4362394..4363423	GAAATTCGGAACAACGGAGA	60.05	GCAATTTTGTATGGATGCCC	60.16	GAAATTCGGAACAACGGAGAATGAGAGTAAAAATATTTTTAAAAAATATTTATTGACGCCAGCAACATGCTGAATGATGACGCCAGCAAAATGTTAGAAATCATTCCATTGAAAAATCAGGTAAATTAGAAAAAAAAAAAATTACTTTTTTACTTTTTTACTTTTTTTTTTTTTTTTTAGGGCATCCATACAAAATTGC
CmoSSR00562	p2	(TA)10	Cmo_Chr01	4364225..4365250	GAAGATTTTGCATGTCGGCT	60.22	TACTTCAAAAGTCCCTCCGC	59.31	GAAGATTTTGCATGTCGGCTTTCTTTTGTAGAATATAAACGTTAACAACATAGATACACGAGCGAATCGAATTGGTGGTAAGGAAACGTTACCGAAAACATTTTAGGTTAAAATAAAATGAATTTTGATATTTAAGTAAGAGGAATAATATGTATATATATATATATATATACGTGTCAAGAATGGCGGAGGGACTTTTGAAGTA
CmoSSR00563	p3	(AAT)10	Cmo_Chr01	4379204..4380239	GCCATGAAAAATTACGCTCG	60.59	CCAAAGTTGCAAATCAACCA	59.56	GCCATGAAAAATTACGCTCGAGTGAACAATATCATATTATTTGAACGGGTATAGTTGCAAAATAATAATAATAATAATAATAATAATAATATTATGAAATAGAATAATAAGAAACAACAAGTTTTTAATAATTTGGTACAAGTAATTTTATTATTATTATTATTTTTTGGTTGATTTGCAACTTTGG
CmoSSR00564	p2	(AT)10	Cmo_Chr01	4386452..4387477	ATCCGGATTTTGGATGACAG	59.75	AGGCTGAGGAAAGGTTGGTT	60.11	ATCCGGATTTTGGATGACAGCTGTATAACAAATGAACCAGCAAAAATTAGATAGTACAGTAACGGCTTTCACAAGTAACCATAAAATATACAATATATATATATATATATATTTATGTCGATCATTGATAAACAGGTTTTAACAACCAACCTTTCCTCAGCCT
CmoSSR00565	p2	(AT)11	Cmo_Chr01	4389283..4390310	AAACATTTGAGAAAAGGGATCG	59.48	GACATGTCAACATTTTCTTCCA	57.58	AAACATTTGAGAAAAGGGATCGATAAATAAAATATATATATATATATATATATTAAAATAAACCAGAAAACGAATTGAAAAATAATAAGGTAACTAATAAGAAATATGGAAGAAAATGTTGACATGTC
CmoSSR00566	p2	(TA)10	Cmo_Chr01	4402478..4403503	TTCACCTAACAGGCCCAATC	59.93	TCATGAGAGATGTGGGAAAAGA	59.67	TTCACCTAACAGGCCCAATCTTTCTTCCTTACACATTTTCGGCCATTTTTCCAATTTTTATATATATATATATATATATTAGAATTACCTATTCAATTTTCCTACGTAACCTCTATACATCTTTTCCCACATCTCTCATGA
CmoSSR00567	p6	(GAACAC)4	Cmo_Chr01	4407385..4408414	CACATTCAATGCAATCCAGC	60.08	TTGTCACAACATGGATGCCT	59.97	CACATTCAATGCAATCCAGCCTTGTAAGTGTGAGAGAGTTGACTTTTTGTATCAAAGATTAAATGCTGATTGCTGTACGTTTGACTCGTTTTTCCTCTCTCTCTCTCTCTTGCAATATATATAAACCTCTACATATACACAACCCTGAATTTGCTTTGTAAACCTTCCCTTCCATACCATTTCTATTATGAGCTAGAGCCCAAGAACACGAACACGAACACGAACACGAAGATCAAGTTCATCAATGATGGGAAGGCATCCATGTTGTGACAA
CmoSSR00568	p2	(TA)10	Cmo_Chr01	4408542..4409567	CTGTGGGAGGGAAGAACAAA	60.08	ATGGCGGCGTAATTAAAGTG	59.99	CTGTGGGAGGGAAGAACAAAAGTGTAAATTAACATGAAATTACATGCTCTATACTATATCTATGTATCTATATATATATATATATATATGGAAATAAAAATCATATGTTATAATTTCTCCATGATCTTATATATCACCATAAGTTTTGTATGTTAAAAGAAGATCGGGATTCACTTTAATTACGCCGCCAT
CmoSSR00569	p4	(TTAT)5	Cmo_Chr01	4418243..4419268	TGGGAGAGTTTTTCTCGTGC	60.38	TGGAAAACAAATCGCCTCTC	60.19	TGGGAGAGTTTTTCTCGTGCCCTTTTTATTTATTTATTTTTAATTTATAATAAAATAAAAACCCCACAACAAAAGCTTTATCCAACTACTCCCTTACCATTTTTATTATTTATTTATAAGTTTAATATTTAATTACATAATTTTAATTATTTATTTATTTATTTATTGAGAGTATGAAAATTGTTCTTAGTTAAGCTGGCATGAGCATTAATTAGGTATTAATTAGGTATTAATTAACAACCACACAATAAATAGAGAGGCGATTTGTTTTCCA
CmoSSR00570	p7	(CTGCTCT)3	Cmo_Chr01	4434078..4435104	AGTTGGGACAGCATTGGAAC	59.97	TCCTAAACCACCCATCAAGC	59.93	AGTTGGGACAGCATTGGAACAGAGAAGGTTAGAAACTCCCAAGAACACAACAAGTAAACAGAGGAAATTAGTGGTAGCCATTGGAGAAGCAGCTGCTCTCTGCTCTCTGCTCTCAAAGGCGATGGCTTGATGGGTGGTTTAGGA
CmoSSR00571	p3	(CTT)9	Cmo_Chr01	4437640..4438672	TGGCACCCACCTCTTTTAAC	59.97	AAGGAAGGGTCCTTGGAAGA	60.04	TGGCACCCACCTCTTTTAACGGATTCATCGTCAAACTTCCCCCTCTTAACACTCCCAAAAATCCCTTCTTTCCTTCAACTTCCAACTCTTCTTCTGCTTCTTCTTCTTCTTCTTCTTCTTCTTATTCCTCCTCCTCAAACCAATCATGTTCGATTCTTCCAAGGACCCTTCCTT
CmoSSR00572	p2	(AT)11	Cmo_Chr01	4443231..4444258	TAGTCTTCAATGCGAGCCAA	59.57	CTCCTCCTCTTCCCATCTCC	60.15	TAGTCTTCAATGCGAGCCAAACATCATGGGTAGTGGGTAGTGGAGACAACAATATATATATATATATATATATAATATATGTTATGTAATTGATTTGAACTAACAATGAAATATTGTTTTGTTTTGTTTTAGGCAACTAAATTTGTAATTTAATTTATTTATTTTTGTGATTTGAATACAAGTTGTCAGATGTATGTAAAAGTTGAATTAACATTTAGTTGGAGATGGGAAGAGGAGGAG
CmoSSR00573	p7	(GGGGTTG)3	Cmo_Chr01	4448214..4449240	GAGAAAGGAAGGGAGGGTTG	60.04	GGGATGATGAAGCAAAGGAA	60.01	GAGAAAGGAAGGGAGGGTTGGGGGTTTGGGGTTGGGGGTTGGGGGTTGCAAGTGAAAAACGAGTATATCATTGATAACGCCATTGCTGAATCGCCCAAACGATTTCTTGCTGATTGGTTCCGCTAATTTTCACAGCCGAAATCTTAGGCTGACCTTTGGTGCGATCCTTCCACGCACAGCATTGCATCGCATCATGCACTTGCCTCTGCCTCTGCCTCCGCCTTCGCTCCTTACCTTCCTTACCTGTTTTGCTGCCCGCCATTCTCCTTTCCTTTGCTTCATCATCCC
CmoSSR00574	p3	(TCT)10	Cmo_Chr01	4448496..4449531	CTTAGGCTGACCTTTGGTGC	59.88	GGGAAAGGGAAAAGGAAGTG	59.91	CTTAGGCTGACCTTTGGTGCGATCCTTCCACGCACAGCATTGCATCGCATCATGCACTTGCCTCTGCCTCTGCCTCCGCCTTCGCTCCTTACCTTCCTTACCTGTTTTGCTGCCCGCCATTCTCCTTTCCTTTGCTTCATCATCCCCTTCTAACTTCCCTCCCTCCCTCTTCTTCTTCTTCTTCTTCTTCTTCTTCTTCGTCTTCGTCTTCGTCTTCTTCTTCATTCACTGCGATTCAATTTCCTTCTTTCACTGCTCTCCCTTCACTTCCTTTTCCCTTTCCC
CmoSSR00575	p3	(TCT)7	Cmo_Chr01	4448897..4449923	GGGTTTCATCCTTCTGGGTT	60.17	AAACTCGTCCAGCTCGTTGT	59.91	GGGTTTCATCCTTCTGGGTTATTTCTATGGCCTCGTTAATGATTGTCAACAGAACATTAACGCCCTCTTAATCCCTCGGATTTTCAGCTCTACTTTCGCAACTATATCCTTAATACTCGCTTTATCTTCTTCTTCTTCTTCTTCTTCCTCTTCTTCTTCTTCCTCTTCTTCTTCTTTAGTGCCGGTTCTTTCAACTATGCTACAACGAGCTGGACGAGTTT
CmoSSR00576	p2	(AT)12	Cmo_Chr01	4457872..4458901	CAATGCTTCCAAAACACTGG	59.17	TGATTCTCACCAGTGGAACAATA	59.48	CAATGCTTCCAAAACACTGGATCTTATCTCCCTTCTAATAAATGCAGCTTTCTTTTATATTTTAAATTATAAAATCTAAATATCATTTTCATAAATAAAAACATATATATATATATATATATATATAATTACAAACACAAATAAAATATATATATATATAGACGAATTTTTTATATAGGAAGATTGATATTCTATTATTATATCTATTGTCGACATAAGTTCTTCACTGTCAATATATTGTTCCACTGGTGAGAATCA
CmoSSR00577	p5	(GGCAT)5	Cmo_Chr01	4466436..4467466	CCGAAGAACGGGAACTCATA	60.07	ATAGAGCGAAAGGGGAGGAG	59.8	CCGAAGAACGGGAACTCATATGGAAACTTTTGTTTCTAGCGTAACTATGGTCGAAAGTAGGTTAAAAGACCAAATTTATAATATAATAGTTGGGCATGGCATGGCATGGCATGGCATGGCGTGCCACGTTGAGTGAAATAGGAAAGTCAGTTAAGCAGAGCATATTATTTTATGGAGCTTCACTTCACTTCATGTTTCTCATTCTCCTCCCCTTTCGCTCTAT
CmoSSR00578	p7	(AGAGAAG)5	Cmo_Chr01	4488409..4489449	AAGTTGAGAACTTTTGGTTGTGC	59.72	GCAACTCACCCTCTCGTCTC	59.99	AAGTTGAGAACTTTTGGTTGTGCTACATATGCATATGTTCATGTTGATCCAGAGAAGAGAGAAGAGAGAAGAGAGAAGAGAGAAGAGAGACGAGCTTGATGCTAATATTATGAAGTGCTACTTCATAGGCTATGTTTCATATATATTCGGGTATAGGTTTATAGATAACAAAAATAAAAAAAAATCCTTAGACATTGTGACGTGAAAATTGACAAAAATGTCTTGTATAGGATAAAGAGAAGAAAGATTCCGAGACTAGGAAGCAAGTGAGACGAGAGGGTGAGTTGC
CmoSSR00579	p2	(AT)21	Cmo_Chr01	4491629..4492676	TGAAAGCAAGTTGTGGAGGTT	59.77	GGCTTGGGCTTGAACTGTTA	60.25	TGAAAGCAAGTTGTGGAGGTTATGATCATCAATTAAATTACTCAAGTTTCAACTAATATAATCAATATATATATATATATATATATATATATATATATATATATATTCTTTCCTTTTCTAAACTCCAACCATATAATACAAAACTTAAACCTTTGCTTTTTAAACATTTCTTTACCATAAAGTTGATGCAAATTTGCATAAATGATGCATCATATATCATGTAACAGTTCAAGCCCAAGCC
CmoSSR00580	p2	(AT)20	Cmo_Chr01	4504327..4505372	AGTGGAAACCCACGTAAACA	57.98	GCTTGGGCTTAATTACTATTCTAACCA	61.24	AGTGGAAACCCACGTAAACATTAGAAAACAATATATATATATATATATATATATATATATATATATATATAATGCATACAAACAATTAAAATCTACAAATAAAAATAAATAATAACCGACATATAATCCAAAATAGAAAAAGAAAAAAGAAAAAAAAATCATACTCTTGGCTTCTAATTTTAGATTAATTTTAAATTTATTATCTTGGTTAGAATAGTAATTAAGCCCAAGC
CmoSSR00581	p3	(AGA)10	Cmo_Chr01	4511024..4512059	TGAGTGTTTCGGATCCACAG	59.68	TGATGTTGGAGCAGTGGGTA	60.11	TGAGTGTTTCGGATCCACAGTGCGGCGATTGCGGAAGATGGTGAATAGAAGAAGAAGAAGAAGAAGAAGAAGAAGAAGGCATTAAAGAGAGGCTCCATAGGCTAAACACCGCGAAATCAACGGAAAAGTGAATACCCACTGCTCCAACATCA
CmoSSR00582	p2	(TC)15	Cmo_Chr01	4511728..4512763	TCTCAAGCATCGCGTGTATC	59.98	ACAAACAACGAATTTTCGGG	59.84	TCTCAAGCATCGCGTGTATCTGACGGCCAAATGGGAACGAGGCCCATTTTGTTTAATCCAACCACGTAGCGCGTGGTTGTTGGCATGGCGCGTTGGAGCGGGTTTTGGTTTAGGGTAGTTGTTGACTAAGTATCTGTCTTTTTTTTTATTAAAAATAATAAAAAATTAAAATATTTTCCCCCCTTTCTCTCTCTCTCTCTCTCTCTCTCTCTCTCGGCTTTGAGATTTTCAATCTCTGATTTTTCCATTTATGACCCCCGAAAATTCGTTGTTTGT
CmoSSR00583	p6	(TTTTCT)4	Cmo_Chr01	4511824..4512853	CCCGAAAATTCGTTGTTTGT	59.84	CGATTTTGTCGGGCTATTTT	59.08	CCCGAAAATTCGTTGTTTGTCTCCCTTTTCTTTTTCTTTTTCTTTTTCTTTCAAAATAGAGGTTTTTAAAAATAAAAATTGATTAAATTATTAATATTTATTTTTTAAAGTTAAGTTTTAAAAAAAAAATTACAATAAAAATAGCCCGACAAAATCG
CmoSSR00584	p2	(TA)11	Cmo_Chr01	4512957..4513984	TTTATCGGAGGCCTCTTTCA	59.78	CGAGGCTAATAAAGCTCGTG	57.84	TTTATCGGAGGCCTCTTTCAGCGTCACAAACTTTTTTGTTTTTACGACCCAAGACTCTTAACAATATTTCTGTTATGAAAGACTACTAAATATATTTTTTTTAAGCGGTTAAATTTTAATCATTTTTATCCATCGAACCACTTTATTCAAAAAATAAACTATATATATATATATATATATACACACACGAGCTTTATTAGCCTCG
CmoSSR00585	p4	(AATA)7	Cmo_Chr01	4516175..4517208	GAATGAAAATTGAACACCCACT	57.96	AATTGATTGCCAACTGGTCC	59.8	GAATGAAAATTGAACACCCACTATTCTAAATAATAACAATAATTTATTAATTCTAAAGGGATCAAAAGGGCAATAAATAAATAAATAAATAAATAAATAAAGAGAAGAACCATAATTAATATCATGAGAAAAAGGAAAAACAATTGAATAAATGGGCTTTTAAAGTTAGGCAATTGCATATAGGACCAGTTGGCAATCAATT
CmoSSR00586	p4	(AAAT)5	Cmo_Chr01	4526448..4527473	GGGGAGAATGCCACTTCTTA	59.13	GCATGGACCACGTTAAACATT	59.74	GGGGAGAATGCCACTTCTTAAAGCATATCCTTCACAATTTCCAATCACTTCCTCTTAACAAACTTTATGTCAACTCAAATTATTCATTTTTTTTCTTTTTTTTTCTTTTTATTACTTTCCCTTTAATTTTCCAATTCCTATTTCCTAACTTTGCTTCCACATTATTACAACATGACAAATGCAAAAATAAATAAATAAATAAATAATATATAAAGTGGTCGTTCCTTTATAAAAATAAAATAATTCATCCATTAAAATGTTTAACGTGGTCCATGC
CmoSSR00587	p5	(ATATT)5	Cmo_Chr01	4527416..4528446	TTCGATGGGGTTGGAAATAA	60.12	ATGCATGGATGTTGATTTGG	59.2	TTCGATGGGGTTGGAAATAAGATTGAGCATATTTTATTCCGTGAAAGCAAAAGAAAAATTTGATGAAATTTTCTTCCCTTTACGCTTAGTTCACATATTATATTATATTATATTATATTAATCATAATAATTTGAAAAGGAATCATAATGTCAAAGACAATGGTGAAAATCTCTTTATAAAATCTTAAAGCCAAATCAACATCCATGCAT
CmoSSR00588	p2	(AT)9	Cmo_Chr01	4527537..4528560	CGATGGGGTTGGAAATAAGA	59.76	TGGATGTTGATTTGGCTACAA	59.03	CGATGGGGTTGGAAATAAGATTGAGCATATTTTATTCCGTGAAAGCAAAAGAAAAATTTGATGAAATTTTCTTCCCTTTACGCTTAGTTCACATATTATATTATATTATATTATATTAATCATAATAATTTGAAAAGGAATCATAATGTCAAAGACAATGGTGAAAATCTCTTTATAAAATCTTAAAGCCAAATCAACATCCATGCATATATAATATATATATATATATATAAGGAATCATAATGTTAAAGACAGTGGTGAAAATCTCTTTATAAAATCTTGTAGCCAAATCAACATCCA
CmoSSR00589	p2	(CT)11	Cmo_Chr01	4538374..4539401	GCTCTTGTCTTTCGTGGCTC	60.14	AACTCAGCGATGAACCATCC	60.08	GCTCTTGTCTTTCGTGGCTCATATTCCATTTTGGAACTACACAATGGCTCATGTAGCCTCTTTCTTTTGCTCTCTCTCTCTCTCTCTCTCTCCACCTCAATCAACACATAAACAAATGGAACAGCAGATTTTGGTTCAACTTTGGACACTCTGTTATATCCTTGTCACTCTGGTCCCTTTCTGGTGTCAATGATAGCCAGTGAACTTGAGATTTTACAATAACTTCTTCATTTGTGGCAGCTAACAAAACCCTGGGATGGTTCATCGCTGAGTT
CmoSSR00590	p2	(AT)17	Cmo_Chr01	4544103..4545142	TCATGATGACGGGATTGCTA	60.03	AGCAATAATGCGAGAGCCAT	59.84	TCATGATGACGGGATTGCTAAACTGTCGTCATAAACCATTCAAATGGTAATACATTGGAAGAATTAGGTGAAGTTTTGATTGTTTTTAAAATAAGATATATATATATATATATATATATATATATATATTATAATTGGAATATTTGAAAATTAAAATATAACATATATAATTATGGCTCTCGCATTATTGCT
CmoSSR00591	p2	(AT)9	Cmo_Chr01	4545124..4546147	TGCATGGTGAGTGAGGTAGG	59.7	TTGGAGTCAGCTGTCGTGAT	59.42	TGCATGGTGAGTGAGGTAGGTCGAATTTGACTGAATCACTGTAAATATATATATATATATATTTTTGTATAGTTATTTATTATTTTGAATAGAATTATTTTTATAATTGTGATTTTTAACTGGTATAAAATGTTTGATTTAGCTTAAATAAATTAAAAAAAAATCATATTTACTCCGATATAATGATGTCTAATATGAATATGTTTAATCTTAGAATGCTGAATATAATTTTTGGTCAAATTAATAGGGTTCTCGTTAATGTCTTATCTTTAGAGTAAATATCACGACAGCTGACTCCAA
CmoSSR00592	p8	(GATTTGGT)3	Cmo_Chr01	4546687..4547716	TCTCTTACCGAAAACCCACG	60.1	GGTATGTGTGCAAAACGACG	60.03	TCTCTTACCGAAAACCCACGTCAACACTCTCGAAGATCAAGAACAAGAAGCTACCCGTCTCAGAAACGCAAGGATTTGGTGATTTGGTGATTTGGTGAAGGTTCTTTCCCTTTACTTTGAATCTTTACTTTTCTTCTAATCCATTTCATCAACATTCTGGAATCGTGTTATATTACTATTAAATAACTATAGCTATGATCCTGTGACTGGTTTTTGACTAAAAAGATGCCCATCTTTTAGTGTTCGTCGTTTTGCACACATACC
CmoSSR00593	p2	(TA)10	Cmo_Chr01	4550595..4551620	TTGTCCCCTACTCGTTTTCG	60.1	AACCCTGTTTCTCATTAACGAAGT	59.5	TTGTCCCCTACTCGTTTTCGGGCTGGGTTAGGGGCCCTACTCATATTTATTAATTATATTTTTTTAATCTTAAATTTGTTATTTATTTTATTTTTATTCAGCTTTAAAATGTTTTGTTTATTCTTATATATATATATATATATATGGATTAAATAGAGCCCCTAAAATTTTAGGTGATAAATTAAAATAAAAAAATGAATTAAATTACTTCGTTAATGAGAAACAGGGTT
CmoSSR00594	p4	(TTAA)5	Cmo_Chr01	4561519..4562544	AACACCATCCAACATCCCAT	59.91	GAAGTCGCAGGGACCCTAAT	60.46	AACACCATCCAACATCCCATAATGTGGCAAAGTTTATGCCTATTTGGAGGCACTAAATGCACCAAAAACGTTACTTAAATATCTTACATCCCTAAACATTTGAAAACTCACTTTTTAGCTTCTAGGTTATTGCTTAATTAATTAATTAATTAATATTTAATCTATTAGGGTCCCTGCGACTTC
CmoSSR00595	p5	(AAAGA)4	Cmo_Chr01	4592209..4593234	CGTGTCAATAACCCAACGGT	60.67	GCAACTCCCAATAGGTCCAA	59.93	CGTGTCAATAACCCAACGGTTAACACAAAAAAAAAAAAAAAAAAAAAAAAAAAAAAAAAAAAAAAAAAAGAAAAGAAAAGAAAAGAGGAATTAAGGGGACTATATAAAGTCAAAAAGAAAAGAAATTAAGAAGAACGAAAAAGAAGAAAGAAAAGGCAGATCCCAGTGGCCAACTCTGGTAACTTCCGAGCCCTTGGACCTATTGGGAGTTGC
CmoSSR00596	p8	(AAAAAAAG)3	Cmo_Chr01	4599712..4600741	GGGACTAATCACGGTTTTTCTT	58.56	GAAAATGGAGGCATCTGGAA	60.01	GGGACTAATCACGGTTTTTCTTGTTACAAACTAACCAAACTTTTATTAAATCGAATGAAACTGAATGTACAAAAATAATAAGAATAAAGGATGTATAGTTTATTAAGATAAAACCAAAAATATCCTGTAATATGATTATTAAAAAAAGAAAAAAAGAAAAAAAGAAAAAATAAAGGCATTAGATGCGGGATGGGCCACCAAGGGGAAGACTTCGTGGCCGTGCAAATTATAACGTCTGGTAAAATCCGGCCAAGTCTAGTTCCTTCCAGATGCCTCCATTTTC
CmoSSR00597	p2	(TA)14	Cmo_Chr01	4616205..4617238	TTGTCTTTTCTGTCACTTTGGC	59.4	TGGTTTGAAAAACCTCTTGTGA	59.63	TTGTCTTTTCTGTCACTTTGGCATGTATAAAAAAAATATTGTGCCATTTCAGTTCTAACAGCATTTTCTAATCTGTTACTTTTATATATATATATATATATATATATATATCGAAATGGACGATTCCATCGTTTATACTTGAAACGAATAGTCACAAGAGGTTTTTCAAACCA
CmoSSR00598	p4	(AAAT)5	Cmo_Chr01	4644294..4645319	CCGATTTGAATCAAGCCATT	59.9	AGAGATGGCTGGGAAAGTGA	59.8	CCGATTTGAATCAAGCCATTTGTAATAATACAATGAAACATCCCTAAGTTTAAACATATTTTGTACAATCTTGTCATCCACCATGAAGTCTTTATGATATGATCAAGTGTAACAACCCAAATAAATAAATAAATAAATAAACAAATAAAAATTAATTATTCCCTCATTTCTTTCCACTAATCGTAGTCACTTTCCCAGCCATCTCT
CmoSSR00599	p4	(ATGA)5	Cmo_Chr01	4664687..4665712	GAGGACGGTGACAGTGCATA	59.71	GTAAAAGCCCGTCCCTCACT	60.5	GAGGACGGTGACAGTGCATATATGGATGCATGAATGAATGAATGAATGAATGTAAGGAATATGCATTTCATTGAAAATGATGATAGTACAGAAGAAAGCAGCAGAATAGATTTTGAGTGAGGGACGGGCTTTTAC
CmoSSR00600	c	(CTA)9(ATA)9	Cmo_Chr01	4681681..4682740	CTCCAACCCCATTCCATAAA	59.62	TTCATTCAACCCTTTCTGCAT	59.56	CTCCAACCCCATTCCATAAATACATGAACAGACATGCATATGCATGAATGTATGCATATACACATATATTCATGCTTTGGCCAACCATCTTGTTCTTTGTTGTGCTTGATATTTAACGTCTACTACTACTACTACTACTACTACTAATAATAATAATAATAATAATAATAATAATTAAAAAAATAATAATAAATAAAATAAAAAATAAAAAATGCAGAAAGGGTTGAATGAA
CmoSSR00601	p2	(TA)23	Cmo_Chr01	4691448..4692499	TCCATGAAAGAGTGTTCCAAGA	59.71	GGATTCAGCAAACATTGCCT	60.08	TCCATGAAAGAGTGTTCCAAGACACTTCAAATCAAATGGTAAAATTAGATGATTGATTATCCAGACTTGAGTAGGAAACAATCAATTGAGACTTTAACCTAAAGTTAATAAGCATGTATCAATTAAAACCAAAGGTTTGATTATTGAGTGCAATTTACAAAACTTCTCAAAGTATCTATAATGAGATTATATATATATATATATATATATATATATATATATATATATATATAGATAACACGGATTTGATCTTTAAGGCAATGTTTGCTGAATCC
CmoSSR00602	p2	(GA)10	Cmo_Chr01	4707284..4708309	AACTGATTTGCACACAAACTCC	59.15	CTCCCTGTCTCTCCCCTCTT	59.8	AACTGATTTGCACACAAACTCCTAATAAAAATGAACAACTTGACTAATTCAAATAATCAATAAGTTACATTAAATTCTGATCAGAAACATAGAAAAAACGAGAGAGAGAGAGAGAGAGAAAGAGGGAGAGGGAGAGAGAGAGAAATACCAAAATACTCCAACCAGCCCAACTAGAGAAACTCGATGTCAAAACGGTTGAAAATAAAAGTTCGCTCTAATACTAATCTGTTAAAATAACACTCACGAAACTGTGGAAGAGATGTCAAGAGGGGAGAGACAGGGAG
CmoSSR00603	p4	(AATA)5	Cmo_Chr01	4711194..4712219	GACGTTTGTTTTGGCATCCT	59.98	AGTATCCTTGTGGGTCGGTT	58.38	GACGTTTGTTTTGGCATCCTTACTCTAATATAAGATGTTAGATATTACCTACAGTCGAAATATATTGAATGGAAGAACCTTAAGCACTATACTTTTCAATTCTTTTTGTCGTTGTCAATAAAGTATACGTTTGAAAACTATGTATAGAGGAGAAAATATTAATCAATTTCTTAAACTTTTTCCAGAAGGTAGTAACTACTATAATAATAATAATAAATAAATAAATAAATAACCAACAATTTTTCTAAACTTGTTCAAAGTTAATAACCGACCCACAAGGATACT
CmoSSR00604	p7	(CCCCCCA)3	Cmo_Chr01	4717123..4718149	AAGAGCATTATGGGGTGTGG	59.81	ACAAGGCGTTGGTCTTCATC	60.12	AAGAGCATTATGGGGTGTGGGGTTGGATTTGACCAAGTTGGTAAGATTGGTAAGATGGAAAGAGAAGTGGTTATTGGTTACACATTTCCATTACTCCTTAAAAGCTCTTCTCTCCCCCCACCCCCCACCCCCCACCATATAAATCCCTCCCCTTCTCCCCCTCTTCCAAGGCCTTCTTCTTCTTCTTCTTCTTCTTCTTCTCTTCTTCTTCTTCAATGGGGCGATCCCCTTGCTGCGAGAAAGCCCACACCAACAAGGGCGCTTGGACCAAAGATGAAGACCAACGCCTTGT
CmoSSR00605	p3	(CTT)9	Cmo_Chr01	4717182..4718214	CCCCCACCATATAAATCCCT	59.73	GGATGTAATCGACAAGGCGT	59.96	CCCCCACCATATAAATCCCTCCCCTTCTCCCCCTCTTCCAAGGCCTTCTTCTTCTTCTTCTTCTTCTTCTTCTCTTCTTCTTCTTCAATGGGGCGATCCCCTTGCTGCGAGAAAGCCCACACCAACAAGGGCGCTTGGACCAAAGATGAAGACCAACGCCTTGTCGATTACATCC
CmoSSR00606	p5	(CATAT)4	Cmo_Chr01	4723147..4724172	TTAAGGCATGTACCGGGATT	59.3	TGTGTTATGATGTGACGTGTTGA	59.94	TTAAGGCATGTACCGGGATTGAATCTCATATCATACATGGTCTTATGTCATATCATGCATATAACATATCCTTTGACATATCATATCATATCATATCATAGCATGCATGTATCATATCATAAAACAAATCACAACATGTTTTGTATGGTCAAACATATTACACCATAACATATATCATATCATCAACACGTCACATCATAACACA
CmoSSR00607	p3	(TAT)11	Cmo_Chr01	4736390..4737428	TGGAGAGATTAAGGGAGGGG	60.39	CGTACAACGGCCTGTTAGGT	60.05	TGGAGAGATTAAGGGAGGGGTGGTCACTTTTTTTTTCTTCCTTATTTTATTATTTTTATTTTCCTATTATTATTATTATTATTATTATTATTATTATAATATATAACCTAACAGGCCGTTGTACG
CmoSSR00608	p3	(TTA)11	Cmo_Chr01	4753300..4754338	TTTTTAGGGAAGGAGGGGTG	60.28	GAGTCGTGGGATACCGTTGT	59.85	TTTTTAGGGAAGGAGGGGTGAGAGTTGGAAGGAAGGAGAAAAGATCGGTTACCAAATTTTTTTGTATGAGTTATTTATTTATTTATTTTATTATTATTATTATTATTATTATTATTATTATTTTATTTTCCCCGGTTGTTACACTTTTGCAGAGAACTACATCTCGAATTTCATCAAACTTCAGTTTGTTAGATCCTCGGGAACTACTGATTGCAGCAACAACGGTATCCCACGACTC
CmoSSR00609	p2	(AT)9	Cmo_Chr01	4754037..4755060	AAAGATCGTGGTGACTTCCG	60.11	TGCTGCTTGTAGCTGAGTCAA	59.94	AAAGATCGTGGTGACTTCCGCCTAGCTCTGATACCAGTTGTTAGGATCGCACAACAACACACACACTCGATCTAGATGAACAGAAAGAACAAGATAGACAAAATGCAAGGAGAATATTGGCTAGAGAATACAGAGAATAACATTTTCAAAGCTCTGTCTAATGGATATATATATATATATATAACTTTTTATACATATCTATTTACTATTTATGACAATTTACTTTACATATCATTTATCAAATATAACTTTGCTATGTATAAACGTTGACTCAGCTACAAGCAGCA
CmoSSR00610	p4	(AACA)5	Cmo_Chr01	4758617..4759642	CATTTATTGCCCTGAAACGG	60.31	AAAAACAAAAAGGGGGTTGG	60.06	CATTTATTGCCCTGAAACGGCTTTGATTTAATTTAACCAAAGTTAACAAACAAACAAACAAACACACTCTACCCCATTATCATCATTTTTTATTCTCCTTCAAGTTTTCAACTGTAAAGTTGCTGTTTTGTTTCAATTTCTTCAATCTCTTCTCAATTATCATCATATTCCCAAATCAATTCTTGATCGAGTAATAAAACGTTGAGGCGATTTGTAAACATGGGTTGTTAATTTCAGCGTTAAAAAGTCTTCCAAATTTTGAAACCCCAGCTCGGCCCAACCCCCTTTTTGTTTTT
CmoSSR00611	p5	(TCATA)4	Cmo_Chr01	4769335..4770360	AAGCATTTGGATTTGTTGGC	59.94	CCACCAGCTCTGTCACTGAA	60.02	AAGCATTTGGATTTGTTGGCGCAGCTTTGCCGATTCTTGCTGATAATACTTCATTTTTTTTTTTTTTTGTTCATATCATATCATATCATATAATATGTTAGCCTTAATGAATATCAATGTTTTATGATTTGTGACACTCCAAAAAATTAATAACTTATAATTTATAATGTATGGAATGAATAAGGTATTTGATAAGGAAAAGAAATGGAGCTGACTTGAGTATTTAGTTCAGTGACAGAGCTGGTGG
CmoSSR00612	p4	(AGAA)5	Cmo_Chr01	4771634..4772659	GCAGAAGGTGACCTGACGAT	60.27	CAAACTCCCACTCACCCATT	59.82	GCAGAAGGTGACCTGACGATTTGTTGTGTTTTCGATTCTCTTTATCTCAATCTTTCCTCTACCCATATCTTATTCAGAACCAGGCAAGAACAACAATATTTGGTTGTTGTATGATGAACACAGATCTAAATGATAGATATGAAGAGAACAGACCTTAGAAATATGCAAAATCTAATTCAAATCTGTATTAAGATTTAGAAAGAAAGAAAGAAAGAAAGAGAGAAAAGGAAAGAAAATGGGTGAGTGGGAGTTTG
CmoSSR00613	p2	(TA)10	Cmo_Chr01	4799458..4800483	CCACCACTTCCCACTCACTT	60	ATATGAGTTTTCCGGCGACC	61.2	CCACCACTTCCCACTCACTTTAATTGTGTGGGTATGTAACGACCCGGGAAAGAAAGAAAGAAAAATATATTTATTATATATATATATATATATAATAAATAAATGAAAACGAGAAAACGAAAAAAAAAAAAAAAACCCGGTCGCCGGAAAACTCATAT
CmoSSR00614	p2	(AT)10	Cmo_Chr01	4810139..4811164	GTGTGATTCAAGCATGGGAA	59.5	CCATGGGTTAGAATTCATGTCA	59.69	GTGTGATTCAAGCATGGGAATAATATTGAACATTTTTTTTAATGTTGTTTTCTAAGAATAAGAATTACAGAGGATAGACTATGAAAAAAGAATATAACAAGAAAGCATAGAATAGTGCGCTACCTAAAATAACTCCATCAAATTCTTTCATACAACAATAATGATATTTTCTCATTACAAAACTTTAGAAGTGAGATCTTTAATATATATATATATATATATTCTAAGATTATACTCGTGCAAAATTTTTGAGACTGACATGAATTCTAACCCATGG
CmoSSR00615	p8	(TGATGACG)3	Cmo_Chr01	4810599..4811628	TCCAATGACCCTTGCATGT	59.91	CATCATCATTTAACGTAACCACATC	59.57	TCCAATGACCCTTGCATGTGTCATTTATGATTTATATTATATGATGATATGATGACGTCATATGATGATGTGATGATATCATATGATGATGTGATGACATCATATGATGATGTAATGATGTTATATGATGATGTGATGATGTTATATGATGACGTGATGATGTTAAATGATGTTAAATGATAACGTGATGATGTTAAATGATGACGTGATGACGTGATGACGTTAAATGATGATGATGTAATGATGTTATATGGTGATGTGATGAAGTTATAAATGATGTGGTTACGTTAAATGATGATG
CmoSSR00616	p2	(AT)17	Cmo_Chr01	4817937..4818976	GAAATTTAGGGCGTTACCGTT	59.41	TAACCCTGCCCAAAAATTCA	60.29	GAAATTTAGGGCGTTACCGTTTAAATGAAAAGGAACATCAGAAATTACAAGAATTTTGTCATTTTCTTCTCGGAAATAGAGTAAATATTTATATTATTTCATAATTTAACCATATAGGGATTTCTTAACCTTTTCCTTGAAATTTAAACGTAATATTGTATTACATATATATATATATATATATATATATATATATATAGATATATTTAATAATTTTTAAAAGAAATAAATTGATATTTTCTAGTTTAACAATGAATATTTGAATTTTTGGGCAGGGTTA
CmoSSR00617	p6	(TCAATT)4	Cmo_Chr01	4826760..4827789	GGGCACTTACCTGAGCTTAGAC	59.44	AGAAGATTTGGTGAGCCGAA	59.81	GGGCACTTACCTGAGCTTAGACTAGTATGACCAATTTATCAAGTTCTATTTCGTTCTTTATATCTAAGCAACCTATATGAACCATGACATCAATTTCAATTTCAATTTCAATTCTCTAAATTTTACCATAGTCCATATGTTAAACTTCATGTAAGCATTAGAGACTTTAGGAGTATTATATATATATATATATATATATATTTCATTATCCTTTTTACTATATGTATTTACTCTGTCAAATTGTTTCTGTATTTATTTTAATTCGGCTCACCAAATCTTCT
CmoSSR00618	p2	(TA)12	Cmo_Chr01	4826847..4827876	GGGCACTTACCTGAGCTTAGAC	59.44	AGAAGATTTGGTGAGCCGAA	59.81	GGGCACTTACCTGAGCTTAGACTAGTATGACCAATTTATCAAGTTCTATTTCGTTCTTTATATCTAAGCAACCTATATGAACCATGACATCAATTTCAATTTCAATTTCAATTCTCTAAATTTTACCATAGTCCATATGTTAAACTTCATGTAAGCATTAGAGACTTTAGGAGTATTATATATATATATATATATATATATTTCATTATCCTTTTTACTATATGTATTTACTCTGTCAAATTGTTTCTGTATTTATTTTAATTCGGCTCACCAAATCTTCT
CmoSSR00619	p2	(TA)14	Cmo_Chr01	4826997..4828030	TTCGGCTCACCAAATCTTCT	59.81	CTGCTAACAAAATGCATTGAAG	57.68	TTCGGCTCACCAAATCTTCTCTTTTCTTCCTCCCGTCTCTCTCTTCTCTTTTTTGTATTTACTTTTATATATATATATATATATATATATATATTCCTTTCTCTCTCCTTTTAATTCTATAGGGATCTTATCTGTTTAATTCTTTTTCTACTATTTCTTTTCTTATTTCTCTCTTAAATTCTTTTCAAACCTCTCTATTTAATTCTTTTCTTCAATGCATTTTGTTAGCAG
CmoSSR00620	p5	(CTTCT)5	Cmo_Chr01	4835197..4836227	CCCTTTCCCTCACTCACTCA	60.23	CAGGCTTTTAGAAAGGCGAA	59.6	CCCTTTCCCTCACTCACTCACTCTTATTACAACCTCTTCACTTCTCTTCTCTTCTCTTCTCTTCTACTTTTGGGGTATATTTAATTTTCAAACCTTATTGTAGCTTCTTATATTATATACAACGCTACTATTAATATTTCATGGTTCATTCTTCTTTACACACAAAAGTGCAGCACTCACAGTTTGAGAGACCACAGCCTTCTTCTACCTTTGATGATGCTCTACCAAACTTGCTTGGATTCTTTTAAAGCTCATCATAACTCTTATTCGTCTTCGCCTTTCTAAAAGCCTG
CmoSSR00621	p4	(TTAT)5	Cmo_Chr01	4860680..4861705	CAATTTGTCTCACTTCACCAAA	57.79	CGAGTAGGGCTCCAGACAAT	59.31	CAATTTGTCTCACTTCACCAAAAATTAAATAACTCTCTATATTTAATTTCTTAAATAAACATCAAAACCCATTTAAAAAAAATTTACAAAAAAAACAAAAAAGAAGAAGAATAAGAATGATTCTTTTTTTTTTTATTATTTATTTATTTATTTATCACTAACTGGTTAATATAAACATGAGATCTCAACCACATTAATATAAACATGAGATCTCAACCACGTTAATTAAAACAGGAGCCACATGTAAAAATTGATATCAAAATCTCGACTTTTGAAGTTATTGTCTGGAGCCCTACTCG
CmoSSR00622	p2	(AT)10	Cmo_Chr01	4930939..4931964	TCGCCATAAAGTGCATCAAG	59.83	AGCGGTGTTGTATGATGTCG	59.6	TCGCCATAAAGTGCATCAAGCATATCAAGTATGTCATATATCGAGATATATATATATATATATATACATATACATATATATATATACATATATATTACGCACATCATCATACAGCATAACTCAAACATCATCATATACTAGTATACGACATCATACAACACCGCT
CmoSSR00623	p2	(AT)21	Cmo_Chr01	4935328..4936375	TTTTTAAGCACTTACTCAGGGG	57.66	GCATGTGTCTTGGTCTCGAA	59.84	TTTTTAAGCACTTACTCAGGGGTATATATAAGGTTCAGTTTACTATATATAACTTTACTAGATATGTCATCTAATATATATATATATATATATATATATATATATATATATATATAACTATGATCATATATAGTTTTACCAGATATTAGCCTCTTATTGTATATCTTGTTTACTATATATGATTATTTACTTTATATGTCACTTACCATATTTCAGGTTAAGACAAGATATTCTTGTACGTCTGATGACGACATCGCAATTCGAGACCAAGACACATGC
CmoSSR00624	p5	(AAACG)4	Cmo_Chr01	4939833..4940858	GTGTGCGAACTAGCTGGTGA	60.06	TCGTCAGCCGTACAAGAATG	59.86	GTGTGCGAACTAGCTGGTGAGCCCATACTCGCACGTATGGGCTGCGTGTAGAGTATATGGTACACGTCCACGATTATCTGTTAGGATTACACCGTAGGGAAAACGAAACGAAACGAAACGAAAGATAGGTCCCATCATTTTATTGCATGTAATTGTTGCATTTAACTCCAATAGTGGGGTCACTTACTGAGTATTTCTTTAAATACTCAAGCCATGTGCTACTACATTTTTCAGGTTAAAGCAAGGCATTCTTGTACGGCTGACGA
CmoSSR00625	p2	(AT)11	Cmo_Chr01	4948943..4949970	TAGGAACGACATGACCACGA	60.11	CAAGTCAATTTATCGCATATCTCG	60.01	TAGGAACGACATGACCACGAAGTGTTTATGATATGATATGATTAGGATATAACATGTGAATGACAGAAATATATATATATATATATATATGTTGTCATACGATCTGAAATATGTTATGGTACGAGATATGCGATAAATTGACTTG
CmoSSR00626	p2	(AT)12	Cmo_Chr01	4969505..4970534	CCTCCCCCTTTATCTTCCAG	59.89	CCTCAGTCTAAGATGGGACCAG	60.12	CCTCCCCCTTTATCTTCCAGATTTTAATACAAATCTTACACACGCTTTCATATATATATATATATATATATATTAATAATTATAATATTAAAAAATATTTACACAATATATGTGTTTGAATTTGTATTATTAGATTTGGACATATATGTTAGTAGGTTAGTAGTAAAATTGGCTTAATAAAACATTACTGGCCAATGATTTTTAGAATTACACTATTGCTTGTGTATACCTAATAGAAGTTCGAATAAGTTAGAGACTGGTCCCATCTTAGACTGAGG
CmoSSR00627	p2	(AT)11	Cmo_Chr01	4986570..4987597	AAGCGTACGGTTTATGGTCG	60.02	GGTTGCTACCCGCTATTTCA	60.1	AAGCGTACGGTTTATGGTCGGATCACCCTGGCGGTGCGTTGACTATTAATGATGCCTTTTTGACGCTTCTTGTGTGTACCATTCCAATATTAAACGCACAAAAATTCAAATGTTTTTCTACTTACCTTGCTCCAGCTGTTTCACTCACTCCCTCCCCAAAAATTCAAAAAAAATATAATAATATATATATATATATATATATTTATAAACACGTTGAAAATGAGGAGAAAATGAAATAGCGGGTAGCAACC
CmoSSR00628	p2	(AT)15	Cmo_Chr01	5009796..5010831	GTGAAAAGAGTTGGGCCTGA	60.23	AACGTCCGACACAACATCAA	60.01	GTGAAAAGAGTTGGGCCTGAGATATTAATAACAATTAGAATTTTTAAATTTTTTTTTTTAAATTAAAAGTAAATATTTTATATACCGCTAATAATATATATATATATATATATATATATATATTTTTTTTTTTTTTTTTTTAATTTAGGACATTAATAAAAATCCCAAAGAGGAAGCATTGAGAAGCTACTTTGTGTGCATGCAACCTTTCAAGCCAATGAAATGCACGCTTTGCGTGACGTTGTATATTGCTCATTGATGTTGTGTCGGACGTT
CmoSSR00629	p4	(TTTA)5	Cmo_Chr01	5013345..5014370	CCAAACACACCTCGTCTCCT	60.15	TGATCCCCGTCCAAAAATAA	60.12	CCAAACACACCTCGTCTCCTCTGTGTTCCGATCCTTTTCATATTAACTTTAAAAAATAGCATTACTGTCCTTAACCTTTATTTATTTATTTATTTATTTTTTTTAATTTAGGGATATTAATATTATTTTAAAAATTAATTGGTATTTTTTAAATGTGTACCGACAGTTCCATTCATATATTTAATTTAAAAAAAGGTTTTAAAATATATTTTTATTAATTTAAGTTAAAAGTTTTAAAATAATTTTATTTTTGGACGGGGATCA
CmoSSR00630	p8	(TCTCTCTG)3	Cmo_Chr01	5018644..5019673	TTCTGGTGGAACAATGTGGA	59.94	CCAACCAAATGATAGCACCC	60.19	TTCTGGTGGAACAATGTGGACAGGTACTCTCTCTGTCTCTCTGTCTCTCTGTCTCTCTCTTAAGACTTGGAATATGATATAGTTTGGTTTCTTTGTGGGTCAAAATGGGTGCTATCATTTGGTTGG
CmoSSR00631	p5	(CCTCT)4	Cmo_Chr01	5025015..5026040	AAGGCAGGCAATGCAAATAC	60.1	TGGAACTGTGCCTTCAAGTG	59.87	AAGGCAGGCAATGCAAATACAACAGTCAATCCCCTACACGGCGGATTGAACAAGTTCAACACATTAATAACACCCTCTCCTCTCCTCTCCTCTCTTCCTTACTGCTTACACAACCAACGATCCTAAACCTAATTTATCAAAAATTCAACGACTTGCCCCATAAACTTGAGTAGAATCATACTGTGGATACCCAGGCTGCGGCTGAGGCTGTGGCTGTGGCGACACACTCTTCCCGTAACCTACAGGAGCACTTGAAGGCACAGTTCCA
CmoSSR00632	p7	(GATCTCA)4	Cmo_Chr01	5053424..5054457	CGCAAGATTCTGAGCATTGA	60.1	TGATCGTCACTGGAAAGCAA	60.39	CGCAAGATTCTGAGCATTGAAACTGTATGTACATTGCTTCCGATTCTGTTCTCGATTTGGATAGATTTTGAACCCTAGAAAATAATCTGCGATTGATTTGCTTTCTTTCCGTTTGGATCTCAGATCTCAGATCTCAGATCTCAGATCCGCGATCCCAAGCGATTAATTTCTCATTTCATTTGCTGGATACTGAATTTTGTCCTCCATTATCTTGCTTTCCAGTGACGATCA
CmoSSR00633	p2	(AT)22	Cmo_Chr01	5069911..5070960	ACTCCCCTTTCCCACAAAGT	59.83	CCTCATAACGTGCACCCTAAA	60	ACTCCCCTTTCCCACAAAGTATTCCACAAATTTTACGTCTTTTTATCTATGTTCATATATATATATATATATATATATATATATATATATATATATATTTATCAACAATGGTCAACATATATCTCATTAATAATAAGTTTGGAAGGAAAATACTTTAGGGTGCACGTTATGAGG
CmoSSR00634	p3	(TAA)7	Cmo_Chr01	5073978..5075004	GGCATGAATCACCACTCTCA	59.64	CCGCGTACCAAAACTCAAAT	60	GGCATGAATCACCACTCTCACAGCTTAACTCAATTAATAATAATAATAATAATAATTCTTATTACAATATTAATAATGGGGACATAAATTAATTTAGGCCCATACTAATTGGGGTTGATAATATTAAGCTTAGAGAGGGGGGGGTAGGGCCCCGACCCATAACTACAGAAGTCAAGATTTCGATTTGAGTTTTGGTACGCGG
CmoSSR00635	p2	(TA)16	Cmo_Chr01	5078848..5079885	CCATTTAGGCTCGAGTCTTCC	60.21	TAGGAACCGGGCACATAAAA	60.31	CCATTTAGGCTCGAGTCTTCCTTTTGTATTATTGTATTATGTCTTAACTTGTTTTAGCTATTGGCTATATCGTATAAGGTACTCTTAGGCATTTGTTTTGTAAACTTCAACAACTTTTAAGTAATTTATATGTATGAGTATATATATATATATATATATATATATATATAGACACACACGCATCTAGAAGAAATTTTTTCTAGTTATTTATTGTCTCATGTCTTTCATAAGTTTCAAGTCAATACATAACTGTACGTGGCTTGAGTATCTCAAATAATTATTTTATGTGCCCGGTTCCTA
CmoSSR00636	p4	(AAAT)5	Cmo_Chr01	5080110..5081135	CTTTCGTGCTCACATTCACAA	59.9	TTCACCCATATGCATCAAAGA	58.98	CTTTCGTGCTCACATTCACAAATATTTAAAATGACTTTTCAAATGCTTAAAAAATACAATTAAATAAAAAGAAATAAATAAATAAATAAATATTTTTTTAGCATTTCTTTCTATCTACCCAAATTGTATAGTTTGATTTGTCAAATATTTAAAAGAATGTACAAACATAGAGTCCATTAGGCCTAAATATATACAACTTTATCTTAGGCCTAAATATAGCTTTATCTTTGATGCATATGGGTGAA
CmoSSR00637	p5	(AATAA)5	Cmo_Chr01	5124396..5125426	TTTGTTGGGAAGGAATTTGG	59.77	GCAAATGGCGCAAAAATAAT	59.94	TTTGTTGGGAAGGAATTTGGATGGAATAAAATAAAATAAAATAAAATAAAAGATTGGTCCCCAACTTTCTTATTATTTGCATTTTGGCCCCAATTTTGATTACTTCAACGCTTTGGGCGCCGATTTGTTAGCGTAATCCAAGGCCCCTCCATTTTATTCAAATTATTTTTGCGCCATTTGC
CmoSSR00638	p6	(CAAGTC)4	Cmo_Chr01	5138385..5139414	CCTTGTTTCCATTTGTTGGG	60.2	GTAGACCCTCAATCCGAGCC	60.99	CCTTGTTTCCATTTGTTGGGATAAAATGTTAAAAATTAGGTTAGATTCAAAGTTTGGGTTTTCTTAATACAATAAATATAAGGAATGAGATTTGAAGCTTCAATTGTAAGAGATGCATTTATTAGGGAATAAGTTTCTTAGGCTTTTGAAGGAAGTTGACTTTTGGGTTAGCTTTGACTTGACATGATGCTTAAACGTGTAGGTTTAAGGTTTGTACAAGTCCAAGTCCAAGTCCAAGTCTAGCGGGCGCAACACACCTTGGGCTCGGATTGAGGGTCTAC
CmoSSR00639	p3	(AGA)8	Cmo_Chr01	5152129..5153158	TCAATCGCTTTGATCAGCAC	59.96	AATGCTTCGCTTCCCTGTAA	59.85	TCAATCGCTTTGATCAGCACGTCGGCAATGGCCTTCCCTCTCTCGAGCTCATCGTCATCTCTGAAAACCACAATGCCTTGTCGCCTGAGAGCTTCATAAAGATGGTTGGTAATGGTCTTGCGAGTGTCCTCGCCTCTGAAGCTCAGAAAAACGTCATACGACCATCTAGGAGAAGAAGAAGAAGAAGAAGAAGAAGCAGCTGATTTCTCTGCGATTGAGGAAGCCATTCACAACTTGATCCGGCTGCCGGAGAAGAATTACAGGGAAGCGAAGCATT
CmoSSR00640	p6	(TTTTTC)5	Cmo_Chr01	5152348..5153383	GGTTCCGCTCTATCAGACGA	60.36	CCCAACCTATCAAATAAACAAATCC	60.94	GGTTCCGCTCTATCAGACGACTGACGATTGAAGTTTGAAGTGCTGACCATTTTTCTTTTTCTTTTTCTTTTTCTTTTTCTTAAATATTCTTTTTATTATTTTATATAAAATAATTAAACAAACAATATAGTTTGAAACAAATAATAAAAATAGAACAGAGTTCTTGTCTCTATTCGAATATGTCTTTTTGTAATTTATTTGAGACCAAATTTTTTTGTTTAATTAAGGATTTGTTTATTTGATAGGTTGGG
CmoSSR00641	p5	(GAAAC)4	Cmo_Chr01	5173092..5174117	CGTGTACATCCAAATGGCAG	59.99	GCAATGAAATGATGGGACCT	59.76	CGTGTACATCCAAATGGCAGGACAACGATCGTTATGCCCTGCATAGCGCTGCCGTGACGGTTTTAGTTTTAATGGGTCCTAGTGGGCCCCCAAAGCATGCCCACCGGCTAGGGGCAGTGGCCCAGCGGTGTGCAAACTAGCTAGTGAGCCCATACTCGCACGTATGGGCTGCGTGTAGAGTATATGGTACACGTCCACGATTACCTGTTAGGATTACACCGTAGAGAAAATGAAACGAAACGAAACGAAACGAAATATAGGTCCCATCATTTCATTGC
CmoSSR00642	p3	(TTA)8	Cmo_Chr01	5178126..5179155	AACTGAATTTTTCCCGTCAA	57.19	TTTACAATGCGGACGATCAA	60.07	AACTGAATTTTTCCCGTCAATTTTGAATTTGAATTTTGACTAAATTTAGAATACATTATTGTTATTATTATTATTATTATTATTATTTTGTAATTTGAGGTTTTAACTTTATTGACTAAACAAGTAGAATAATAATAATAATAATTAAGTGATAATGTAAGCGGATTATTAATTAATTAATTATGGTTTAATTTCAATAATTTTGAATTCATAAGCTTTCATAGTTATTGATCGTCCGCATTGTAAA
CmoSSR00643	p3	(AAT)7	Cmo_Chr01	5199401..5200427	CCAAATTGGTGGAAAGATGG	60.16	CCTGAGAGCATCTTGACGGT	60.41	CCAAATTGGTGGAAAGATGGTGAAAAAGAGAGGATTTGAGAGACTATTTACAAAATAATAATAATAATAATAATAAAAAAAATTTAAATCCCTTTAAAAGAAAGTTTACGAGAACTTGACAAGTAAGTTTATGGAACCAAAAACTATGTACGATTTACGATTACCTATCATGTTGTTTCTAGTAAACCCGTCTAGAAAACCCTGAAAACAAGAACTCAAGTTATAAACCGTCAAGATGCTCTCAGG
CmoSSR00644	p8	(TTTGAAGA)3	Cmo_Chr01	5207793..5208822	GGTTCGTCAAAGGGTTTTCA	59.95	TCCGAAATGTCTACCAAGCC	60.07	GGTTCGTCAAAGGGTTTTCACGAATAGCCACCCCATTAACAGAACTCCAAAAAAAAGACCACCCTTAGTCTTGGTTAAATGAATGTCAAAAGGCCTTTGAAGATTTGAAGATTTGAAGACAACCATGACGAGAGGCCCTATACTTGGCTTGGTAGACATTTCGGA
CmoSSR00645	p2	(TA)10	Cmo_Chr01	5214481..5215506	GTTTACGGTATTTGGCCTCC	58.44	GGAGAGAGGAGAGAATTAACCGA	60.21	GTTTACGGTATTTGGCCTCCTCTATATATATATATATATATATTTTGTCTTTTTTTTTTTAATTTTGTTTAACAATATTCTGGCCTCTCTACAATCTTCTCATGTTTTGGTGTATTCTAATTAATTATTTTTTCCAAATCTTTCCTTTTATCTCATATTTAATTTCTTTTTTTTTCTTCCTTTAATTTTGTTAAAATCTAAAATTCACAATATCACAGATAAATTTTCTTTCCAAATCTTTCCTTTCTCCTTTTCTCTTTTCTTTCTTATTTATCGGTTAATTCTCTCCTCTCTCC
CmoSSR00646	p8	(TTTAATTA)3	Cmo_Chr01	5215281..5216310	GGAAGGAGGGGTTAGTGGAG	59.93	CGGCCAAGACCAAAGAAGTA	60.24	GGAAGGAGGGGTTAGTGGAGAGTAGTTTATGGAAAATAATTATTTTAATTATTTAATTATTTAATTATTATTATTTTTTTTGGTCGTTACAGCTTAGGTGCCCGTACACTTTGCGGTGCCACCTCCAAGCTACTTCTTTGGTCTTGGCCG
CmoSSR00647	p5	(AGAAA)4	Cmo_Chr01	5222306..5223331	AGCACCTAGAAAACGCTGGA	60.02	GCCTTTGCAATTTGACATTTG	60.48	AGCACCTAGAAAACGCTGGAAAGGTCATGTTGTTTTCGGGACAAAATTAGGTGGGATTGTAAGTCAAAATTATCTTCTAATCTTTATTTTAATAACAAGGTCCTCCATATATATAAATCATTATCTTCCTATATATGGACATGCCACATTGCAATATTCAACCCAACATAGAAAAGAAAAGAAAAGAAAAAAAAGATTTGGGTATTGAAAGCATATACCCAAAGATCTCATTATCTTCTTCCCTATTCCTTTCAAATGTCAAATTGCAAAGGC
CmoSSR00648	p4	(AAAT)5	Cmo_Chr01	5223297..5224322	AGGAGGAGAGAGAAGGCAGC	60.24	AAAGGGCCAAATATGGAAGG	60.14	AGGAGGAGAGAGAAGGCAGCTAAGTTGATGTTTAGATTAGATATTTAATTAATGGCTAAAGAATTGGTCCATTCTAAATATTAAAACCATTTCCACATTTCATTTAGGAAGACCCTGAAAAACATAGTCAACAATATCACATAATATTGATTTAATAATAATCAAAGAAGGAAAATAAATAAATAAATAAATAAACAATGTTTATCTTCAATGCCTTAATGTTGTTCATGTTCCTTCCATATTTGGCCCTTT
CmoSSR00649	p4	(ACAA)5	Cmo_Chr01	5245430..5246455	AACATCGCAAAACTCCCAAC	59.98	GCCCTATGCGACTCAATGTT	60.1	AACATCGCAAAACTCCCAACAAGGCAACTATAAAATTCCAACTGAAGGAAAACCATAAGACAAACAAACAAACAAACAAAACAGTAGAAAGTAGAATCCCTACCAGAAAAAATTACGTTTCCTTGAACATCGAGGAGTGAGGGAAAACAAACGAATGGATGATAACGAACAGCATTGCCAGAAAAGAGAAATGGAAGGTAACAAAAGAACATTGAGTCGCATAGGGC
CmoSSR00650	p6	(ACAAGA)5	Cmo_Chr01	5282351..5283386	GGGAGTGTCTTGGAGAACGA	60.24	TAAGGGACGACACAAAAGGG	59.96	GGGAGTGTCTTGGAGAACGAATTAAGAAACATAACAAGAACTTACGACAAGAACAAGAACAAGAACAAGAACAAGAAAACAAAAAGTGTGGTACCCTAGCATATCAAGGACACGATTAAGAGCCTACAAGTAGGCTGCTTACGGAGTCTTGTACTCATTCCTTATTCTCCATTTTTTTTCAAGAAATAAGGAGCTGGTCGAGGTCGGGAGCGGACTCTAGAGCAGGTGCCATAGACAAACCTCACCCGTCGTCCTTCAACCCTTTTGTGTCGTCCCTTA
CmoSSR00651	p2	(TA)10	Cmo_Chr01	5288056..5289081	AAGGGCATAATACCACTTGTTTG	59.34	CGCAGGAGTATGCCTTCATT	60.24	AAGGGCATAATACCACTTGTTTGTAGTGAGCTATAAATTTAGCCAAACTTTGAACATATAATAAATGTGTACTTTTGGAATGATCTAATCTTATAGAAATATAGTTCAAATACTTCATTTGTATGTGTATATATATATATATATATATTTTAAGAGAAAATGTTGAGAGATATCTATAAATGAAGGCATACTCCTGCG
CmoSSR00652	p4	(TTTA)5	Cmo_Chr01	5301364..5302389	CCAAGTTGGACTTTAGGAAGCA	60.63	CCTCCGAGTTGACTTTGACC	59.7	CCAAGTTGGACTTTAGGAAGCATTAGTGATTGAGAAAGCTATGGATAAGAAAAAAACTATTAAAAAGAAAATTTAAACGTCAAAAGCTTTATTTATTTATTTATTTATTTTGTAATGTAACACTCGAGTCTTGATGAGTATTAATTTTCTGCTTTTTTATTTAAAGTTTGAATTTTTTAGATTTTATTGAAGGTATTATAAGCTTAATTTTAAGATGAGGTTAAAGAAAAAATGTTTAAAAAAATTTTAGAAACTCAAAAGAAATGAATTTGAAAATTAGGTCAAAGTCAACTCGGAGG
CmoSSR00653	p2	(CT)13	Cmo_Chr01	5331087..5332118	AGGTGGTGTTGTTGGTCCTC	59.86	GTCTCCAAACTGACCTCCCA	60.09	AGGTGGTGTTGTTGGTCCTCGAAGGTGGGCTCTATTGGGTGTATATAGTTCCATGTCCCTATTACTTAACACCCTCTCTTTCCTTCCTTTTTTCCACTTCAACCCAAAAGAAATCCAATACCCATTTCACTTTCTCTTTACCTAATTGCGTATCTCTCTTCCTCTCTCTCTCTCTCTCTCTCTCTCTCCCCTCACCCCTCCATTTGTTGTTCTGAGATCTAATCTGAAATCCCAAAGAAGAGCATGAGTGAAGGTTGGAAGAGCATGAGTCCAGCCAACTTGGGAGGTCAGTTTGGAGAC
CmoSSR00654	p3	(TCT)15	Cmo_Chr01	5333770..5334820	ATATTTGGGTTCCCTTTGGC	60.02	CACAGCAGAATTGGAGAGCA	60.14	ATATTTGGGTTCCCTTTGGCTTCATCTTCCTCTTCTTCTTCTTCTTCTTCTTCTTCTTCTTCTTCTTCTTCTTCTAACCCAAGCAACCAACCATGGTTAGGACATAGGCCAACTTCATGTCTTTCTTCATTTCTTGCTCTCCAATTCTGCTGTG
CmoSSR00655	p2	(AT)10	Cmo_Chr01	5342126..5343151	AGGAGCACATGGAAGAGGAA	59.8	CACCGTGAAGAGCTTGATGA	59.98	AGGAGCACATGGAAGAGGAATAAAAAAAATATATATATATATATATATAGCCCTAAAGTCCATCACATTAGAAGTTGACTACGACGATCAAGATGATGTTACCTACTTCACACACAAGTATAAAAATTTCATCGAGAAGAAGAAACAATTTAAGAAACATTTCACTATAAAGAGCTTGTTTTAAACCATAAAAATTTCATCAAGCTCTTCACGGTG
CmoSSR00656	p5	(TTTAT)4	Cmo_Chr01	5354012..5355037	TCTCAAGACATTTTCGAAAGCA	60	AAGGGAGTCACAAGCTACGG	59.35	TCTCAAGACATTTTCGAAAGCATTCTATGGTTTTTAGGATAAAGAACCTTAGAGAAATAGGAATGTTTCTCTATTAGACAATAAATGTCTAGGAAATTACACCAAAACATTTAATTATTTATTTTATTTTATTTTATTCCAGAAACTCGGATCGTTACAAAATTATTATGGGTAAAATTGACTAGTTCTTTAGGATCTTGCCTTCTTTGATACTTCAGCCGTAGCTTGTGACTCCCTT
CmoSSR00657	p2	(TA)23	Cmo_Chr01	5360812..5361863	CACTTCCACCATTCATCTCG	59.09	TGACGCAAAGAATGTCAACAA	60.29	CACTTCCACCATTCATCTCGTTGAGTAATAATATCAAACTCTACCACTCTGATATCATATTTTTAACTTATCTCTTTATCATCTTCATAGTGGTTCGTGTTTTCAAAACATTTTTCTAGAAAGATAGTCGTCACAATATATGGATATATGTATATGTATTGTATATGTGTATATATATATATATATATATATATATATATATATATATATATATATGTATAATATTGGGTTGTGTAAAATGAAGGATTAGTTGATACGTAGAAAGTTGGAATTGTTGACATTCTTTGCGTCA
CmoSSR00658	p7	(TTCATCC)3	Cmo_Chr01	5367994..5369020	CCCTTTTGACCTCCAAATCA	59.9	GCCCAGATTCCAAAGGTAAA	59.02	CCCTTTTGACCTCCAAATCATCCTTCGCCATACTCTGTACATACAACCTCACCTTTTCCAAACATAGCCTCTTTCATTTTCTTCCCAATTTTCCTTTCATCCTTCATCCTTCATCCTTCACAAAAACCCTAATCTTAGGATCTTCATCAGCATTTCTCTTCGAAAATATACAGAATCTCAATAAGCCCATTGACCTTCTGTAGAGATTTACCTTTGGAATCTGGGC
CmoSSR00659	p5	(GGGTT)4	Cmo_Chr01	5371803..5372828	ACTACAACACGTGGGCAACA	60.07	CGACTGGCCAAAATACCACT	59.99	ACTACAACACGTGGGCAACATGCATTAGGGGTGTACATTCAACCCGACAACCCGGACTAATCCAACCCGAACTATAAGGGTTGGGTTGGGTTGGGTTGGACTAGCATTTCGAGTAGGGTTGGGTTCATTTTTCTGAACTCGAACTGAATCGGTTCAGTTTTGGGTTCGTGGGTAAAATCCTCGGGTTGACCCGAGGCAAATTCAAATATATAGAATATATTAAAATCTATTAAATTATAATAGGTTTGCCAGAGTGGTATTTTGGCCAGTCG
CmoSSR00660	p6	(ACCTTT)4	Cmo_Chr01	5392249..5393278	TCAACCGACTCCTCTGATCC	60.2	TGAAAACCCAAGTAGAGGGG	59.02	TCAACCGACTCCTCTGATCCAGCAGGAGTAGAGTAACCTTTACCTTTACCTTTACCTTTCCCTCTAGCAGATTATGAGAAATGTTATTGTCCCCTCTACTTGGGTTTTCA
CmoSSR00661	p7	(AACAGTC)3	Cmo_Chr01	5402397..5403423	TGGCATCTCACATGACCTACA	60.13	CGTGTTGTATGATGGTGCGT	60.46	TGGCATCTCACATGACCTACATTACATGGCATACTACATAACATGAAAGTACAATCCAGTTGCATAAACATCTCATGACATGACTCGATAATTCTACGTGTATCCATGACATCGATCAACATATTCATGGCATATATTACTAACATCTCATTCATAACTTCACATAACATAAACAGTCAACAGTCAACAGTCAACATAATTCATACATCACATAATCATATCACATAAATATGGTGCATGCAGGGGCCACAGGGCACGCACCATCATACAACACG
CmoSSR00662	p2	(AG)9	Cmo_Chr01	5420390..5421413	TTTCAATGGGATGGAGAAGC	60.01	GTCGAAAGGTTGATTCCCAA	59.91	TTTCAATGGGATGGAGAAGCTTATCCCATATAACAAGGTGAAAACTCAACCCAGTTTGCTCCCTTGTCAGAGAAGTTTCTTGTCGAGCCTCTCTACTATTTTGTACACTTTGCTTGGAATAATGAACAGAGAGAGAGAGAGAGAGAATAAGTGGGAAGGTTACTAATAGCACAATGAGTAGTGTTTGGGAATCAACCTTTCGAC
CmoSSR00663	p7	(CCCCTCA)9	Cmo_Chr01	5439197..5440265	TGCGAAGATGCAGAGAAAAA	59.69	AGCAAAACCAATCTCATTCACA	59.61	TGCGAAGATGCAGAGAAAAAGACATAAAACAGAGAAGAAGTAGAAAAGTGTTTTTTTAGAAAAATAGAGTGTTTTGTCTCTCCCCTCACCCCTCACCCCTCACCCCTCACCCCTCACCCCTCACCCCTCACCCCTCACCCCTCACTCACTGGAGAAAAAATAGTGTGAATGAGATTGGTTTTGCT
CmoSSR00664	p3	(TTA)7	Cmo_Chr01	5463317..5464343	CCCAACACTGCATTGTGTTC	60.01	AAAATCGGATAGCTTGTGACAG	58.4	CCCAACACTGCATTGTGTTCATTATAGCCGATCTGCTCTGTTCTTCACCGTGGAAATTTCCCTTTCGCTTTTCTGCAAGCCTTTCTCTTTTCAGTTGATTTGTTCTTTTTCTTTTGGTATCTACTCGTTTCTTTTTCTTTTTTATCGCTCACGTTTATTATTATTATTATTATTATCATTATTCTTGTTTAACTGTCACAAGCTATCCGATTTT
CmoSSR00665	p2	(TA)12	Cmo_Chr01	5515657..5516686	CCCTTGGAAATGATCGTTGA	60.83	CAACGAGTCTGCCAGTCCTT	60.44	CCCTTGGAAATGATCGTTGAGTTACATTGGGTTGATTTAAACACAACTTCCAAGGATGTTGAGTTTCATTGGGTTGATTTCAACACAATTCTTGATCTAGACACAAGAAAACCCTTATTGCTTTTCTATTTTGGAGATTGAAGGTCACTTCTTTTGTACTTGTTGAGCTAAAATGTATACCGATGATAATAAAAATAAAACATGATATAGTTATATATATATATATATATATATAAACTTTTTTTTTTTTGAAAGATACAAGTTGTAAGGACTGGCAGACTCGTTG
CmoSSR00666	p2	(AT)23	Cmo_Chr01	5527402..5528453	AATGATTACTTCGGGCATGG	59.78	AGGGGAGGGACTGAGAGATT	59.1	AATGATTACTTCGGGCATGGATTCGAGCAACTTGTTAAGCATACCATCTGCATTAACCTAGGTGTTTCCTTGTATTCTTGGGGATTCTAGGTTTATTGTAACGCCCCATTAGGTTTAATATATATATATATATATATATATATATATATATATATATATATATTAAAATAAAAATAACAAAATAAAGAAATGGTTTAATGTATATATTAAAATATAAATAACAAAAAAAAACTGACCACCTCTTCTTTAATCTCTCAGTCCCTCCCCT
CmoSSR00667	p5	(AAACG)4	Cmo_Chr01	5529680..5530705	GTCCAGCAATGTGCGAACTA	59.87	GTCATGATCTCGAGTTGCGA	59.95	GTCCAGCAATGTGCGAACTAGCTGGTGAGCCCATACTCGCACGTATGGGCTGCGTGTAGAGTATATGGTACACGTCCATGATTACCTATTAAGATTACACCGTAGGAAAAACGAAACGAAACGAAACGAAAGATAGGTCCCATCATTTCATTGCATGTGATTGTTGCATAACCCCGATAGGGGGTCACTTACTAAGTATTCTAGAAATACTCAAGCCTCGTGCTATTTTACTTTTTCAGGTTAAGGCAAGGCATTCCTGTACGGCTGATGACGGCATCGCAACTCGAGATCATGAC
CmoSSR00668	p2	(AT)20	Cmo_Chr01	5538853..5539898	CATTTCCTTGCGTCTTGATTC	59.7	TTCACCGGTCCTTACAACTT	57.18	CATTTCCTTGCGTCTTGATTCTAAAGAATAATATCTATTAGAGTATCCTTGAAAATGATGTTGAGTTTCTTTGGGTTGATTTAAACCCAACTTTCAAAGATGTTGAGTTTCATTGGGTTATTCTTGATCTAGACACAAGAAAACCCTAATTGCTTTTCTATTGTGAGATTCAAGGTCAATTCTTTTGTACTTGTTGAGCTAAAATGTATACCAAAAATAAAACGAGATATATATATATATATATATATATATATATATATATATATTTTTGGAAAGATATAAGTTGTAAGGACCGGTGAA
CmoSSR00669	c	(AT)12aataa(AAAT)5	Cmo_Chr01	5552785..5553839	ACCCGGGAAAGAAAGAAAAA	59.92	TCTGAAACTTTGCATGGTGC	59.85	ACCCGGGAAAGAAAGAAAAAAAAAAAAAAATATATATATATATATATATATATAATAAAAATAAATAAATAAATAAATAAAATAAAGTAAAAANNNNNNNNNNACTCAGTCGCCGGAAAACCCGCGAGTTTTCCGGCGACCGCCGAGTTTCGCGGAACCCATGCAAAACGACGGCCACAGCACGCCCACCCTCAACCCACGCACCATGCAAAGTTTCAGA
CmoSSR00670	p8	(TATTATAT)3	Cmo_Chr01	5577510..5578539	TTGGAAGAGTAACAAATTGTGGAG	59.58	GAGTCACGATCAAATGACAAATTC	59.88	TTGGAAGAGTAACAAATTGTGGAGTTTTTCTCATTATTATATTCCTAAATAAAATTACTTATACATAATATAAATTTCAATCTAACCGTTACTTACATCGATTTTTATTATTACTATATTATATTATTATATTATTATATTTATAATGAATTTTAAAATTTTGACTTATCCATTACTCACATTACTCTTTATTATTATTATATTATTATATTATTATATATATAATAAATTTTGAATTTGTCATTTGATCGTGACTC
CmoSSR00671	p8	(TATTATTA)3	Cmo_Chr01	5577586..5578615	TTGGAAGAGTAACAAATTGTGGAG	59.58	GAGTCACGATCAAATGACAAATTC	59.88	TTGGAAGAGTAACAAATTGTGGAGTTTTTCTCATTATTATATTCCTAAATAAAATTACTTATACATAATATAAATTTCAATCTAACCGTTACTTACATCGATTTTTATTATTACTATATTATATTATTATATTATTATATTTATAATGAATTTTAAAATTTTGACTTATCCATTACTCACATTACTCTTTATTATTATTATATTATTATATTATTATATATATAATAAATTTTGAATTTGTCATTTGATCGTGACTC
CmoSSR00672	p8	(CACATACT)3	Cmo_Chr01	5604663..5605692	TGCCGAGAAAACTCATGTTG	59.84	CTCTGGGAATATGGGCTTCA	60.03	TGCCGAGAAAACTCATGTTGTTGTTGAAGCAAACCCTCAATGACACATAACAAATATCCTCCTCACTCTAATCTTGTTGACGGACTCCTCGGACATATGAAAGACACATACTCACATACTCACATACTATGTTGGAAGCAGTTCTGCGAACACGTCAAAGATACGTACTCACATAAGTGAACAGTATGAAGCCCATATTCCCAGAG
CmoSSR00673	p2	(AT)16	Cmo_Chr01	5605030..5606067	AATTGGAGCGATTCCTCCTC	60.55	AAGAACCAAACATTCACAGAATCTC	59.93	AATTGGAGCGATTCCTCCTCAATTTAAAAAATAGTTAAATAAAGTTTTTATTTTTCAATATAATTTTTATTAAAAATTATTTAAAAAATCATAATAAATTATATAAAACAAACATATATATATATATATATATATATATATATATTTTACCAATCTAATTTCTAAAATTTTAAAAGAAATTTAAATTTTAATATTATAAGATAGCTTTTGCCCATTAAATTAAAGTTTAATGTTATAACATGGTATTTGTGTGAATTCTAAAATCTAGAGATTCTGTGAATGTTTGGTTCTT
CmoSSR00674	p5	(TTTTA)4	Cmo_Chr01	5613201..5614226	CGTTTTGTCGGTCGACTCTT	60.29	GACGACCCACCGATAGACCT	61.31	CGTTTTGTCGGTCGACTCTTTTTTTTATTTTATTTTATTTTATTTTTAATGTTAAAACAAAATTAAGAAATGGAAATATAATTTAAATGAATATATATTTAATTCTTTTTTAACCCCTTTTCTATTTTTTACTATTTTTGTCTCTTCATTCTTAATTAATTCTTCATATTTTAAACAAAAATCTAAATTCTTTTCACATTTTTCATCCTTTTACCGTATAACAAAACATGAAATTAGAAACGGTAGTATAATTCTATCGGTTCGAGTCTAGGTCTATCGGTGGGTCGTC
CmoSSR00675	p5	(ATATA)7	Cmo_Chr01	5618365..5619405	GCTACCGACACCTAGCATCC	59.72	TAGGTGGCACGGGTTAAGAC	59.99	GCTACCGACACCTAGCATCCCCTCCCTTCCCTTTCATATAATATAATATAATATAATATAATATAATATATTTAATGCCTTTTTCAATGCATAATTAGCACGGAATTTCTTTCTAGAACCAAAATCAAATTGACACCCAATTTAATGCTTCCCATTCCATACTCAATAATTTCGTACATTATCATAACTCAGGTTAATAACCCGTCTTAACCCGTGCCACCTA
CmoSSR00676	p3	(ATT)8	Cmo_Chr01	5623839..5624868	AAAATAACGTGGCCGTCAGT	59.5	CCCAGCCCACCATATCATAC	60.04	AAAATAACGTGGCCGTCAGTGCTTCTTAATTTATTTCATTTAATTATTATTATTATTATTATTATTTTTTAAAAAGTTGAATTAGTTAGAAATAAAATATAATATAATAATTGATTTTTGCGATGAGGTTTATAAGAGTTGAATCAAAATATGGAGATGAAGTTTGTGTAATTTTTTTTTTAAAAAGAAAATAAAAGGGAAAAAACAAAGGTGTGTATGATATGGTGGGCTGGG
CmoSSR00677	p2	(TA)14	Cmo_Chr01	5674276..5675309	TTTTGGTGCAATCTTGCTTT	58.41	AAATTCCAGCATTGTAGGCG	60.1	TTTTGGTGCAATCTTGCTTTAAGCTTGATTATAACCAATTCAACGATCAATTCTAACAAGCTAAGACTAGTATCTCAAGCATCAAGAACTTGAAAATAAATGGTAAGAACTATATATATATATATATATATATATATATTCTCAGAACTGATTTTTTTTTTCCGTACTGATTCTGAGAGAGAAACAAAATTGATACAAAAAAAATAACAGTAAAGATATTTCACCTCTAGAGCGGCCAAAGAACGTCGCCCAAATGCTCTGATACCAAATGATAAGCGCCTACAATGCTGGAATTT
CmoSSR00678	p2	(AT)11	Cmo_Chr01	5783204..5784231	TTTCGTCGACATTTTCCTCC	60.05	TGCAAACACATCATCAAGCA	59.83	TTTCGTCGACATTTTCCTCCGAATTGCCAGAGTCAACATGAGGGAGGTATTTTAGGGGAGGGACTGAGAGATCAGAGAAGAGGTGGTCAGTTTTTTTTTTTTCTTCTTTATTTTGTTCTTTTATTTTAATATATATATATATATATATATAATAAACCCAACGAGGCGTTACAATGATGATGTGATCGCGTATCTCCTTACTAGTCTTGACCCTGACTATGATCCCTTCGTTGCCTTGATGACTACTAAGAGTGAAGCCCTCATGCTTGATGATGTGTTTGCA
CmoSSR00679	p2	(AT)11	Cmo_Chr01	5794536..5795563	TTTCGTCGACATTTTCCTCC	60.05	TGCAAACACATCATCAAGCA	59.83	TTTCGTCGACATTTTCCTCCGAATTGCCAGAGTCAACATGAGGGAGGTATTTTAGGGGAGGGACTGAGAGATCAGAGAAGAGGTGGTCAGTTTTTTTTTTTTCTTCTTTATTTTGTTCTTTTATTTTAATATATATATATATATATATATAATAAACCCAACGAGGCGTTACAATGATGATGTGATCGCGTATCTCCTTACTAGTCTTGACCCTGACTATGATCCCTTCGTTGCCTTGATGACTACTAAGAGTGAAGCCCTCATGCTTGATGATGTGTTTGCA
CmoSSR00680	p3	(ATT)7	Cmo_Chr01	5861235..5862261	AAGTTTTCTTTCGATTGGCA	57.49	TCCATTGGGTTGATTTCCAT	59.99	AAGTTTTCTTTCGATTGGCAAAATCTAATCAATTTACCAACAAGAAAATTGATTTAGAAGATCTTAAAGAAGAACAAAGTGTTGATAAGATCCAGATCTAACACTTTAAAGAACATAAGAATTATTATTATTATTATTATTTTTTTTTGTTATATATTTTTGTGATAGAACATGAACATTCTACACAAACTGAGAAAAAAAATTATAAGACAATTAAAAGAGATAAGCGCAATGGAACATATATTCGATCTTGAGCCTGAAGCTCTGATACCAAATGATATGGAAATCAACCCAATGGA
CmoSSR00681	p6	(GCAAGG)5	Cmo_Chr01	5871840..5872875	AGACCCCATCAATGCTCTTG	60.07	CATGATTGAAAACACCACGC	59.97	AGACCCCATCAATGCTCTTGCTTGACAATACCGCAAGGGCAAGGGCAAGGGCAAGGGCAAGGCTTAATTCGGGTCATCCCATTGCTTCATTATCCTTTAAATTCCTACCAAACTTCAAGTCCCAGAATTTGTTGACAATATTCCACATTACTTTGATCGTGGCTTTTTTGCTATGAGAGAGCCAATACAAAAGTGGATACTCAGGGCTAGCGTGGTGTTTTCAATCATG
CmoSSR00682	p2	(AT)10	Cmo_Chr01	5876785..5877810	TACTCCCTTGTCATGGCTCC	60.07	AATTTAGGAGATGGCACCCA	59.39	TACTCCCTTGTCATGGCTCCTTTCGAGAATCTACCTCATTCAAGCTAAAACATATGTATATATATGTGTATATATGTGCATATATATATATATATATATACGAGAAAGAGGGAGAGAGAGAGAGAGAGAGTACCAAGTTAGCTATATGCATTGACGCTCTTGTGGGTGCCATCTCCTAAATT
CmoSSR00683	p2	(GA)9	Cmo_Chr01	5876817..5877840	TACTCCCTTGTCATGGCTCC	60.07	AATTTAGGAGATGGCACCCA	59.39	TACTCCCTTGTCATGGCTCCTTTCGAGAATCTACCTCATTCAAGCTAAAACATATGTATATATATGTGTATATATGTGCATATATATATATATATATATACGAGAAAGAGGGAGAGAGAGAGAGAGAGAGTACCAAGTTAGCTATATGCATTGACGCTCTTGTGGGTGCCATCTCCTAAATT
CmoSSR00684	p5	(TTATT)5	Cmo_Chr01	5894782..5895812	GATCAATTGACCCGATTAAGAA	58.06	TCGTCCATTAAGATGCCACA	60.07	GATCAATTGACCCGATTAAGAATAGAGTTCTATTCCCTTATATTTTTCTTTTGACTAATTTTTTTACTAATATTTGTAATTATTTTATTTTATTTTATTTTATTTTCTCACTTACCACTTTAATAATTTTTTTTATCTATCGATAATAACAAATTTATACAATATCTTAAAAAATAACAACACTTAATCACATAATTCTTCGAAATATGATTTCTTACGATGATGTAAATGCCGACATGTGGCATCTTAATGGACGA
CmoSSR00685	p5	(CCAAC)4	Cmo_Chr01	5908004..5909029	ACCCAACCCGAAAATAGAGG	60.18	GCCTAAAACTAGCCCAACCC	59.97	ACCCAACCCGAAAATAGAGGGTTGGGTTGAGAAATTTTTTGGGTTGGGTCAAAAAAATCCTCCAACCCAACCCAACCCAACCCAATCCGGACCATGTACACCCCTACTGATGCGTGTACAGGCTGAGTTGGGTTGAGTTGCAGCGCGATGCCTCACAGGCGTGGCCGAAGCGATGGATTTAGGCCTCGGGTTGGGCTAGTTTTAGGC
CmoSSR00686	p2	(TA)19	Cmo_Chr01	5915580..5916623	CCTTTTGCCAATTATAGGAGG	57.79	GGTTAGAAGAAATCCAAGGTCA	57.35	CCTTTTGCCAATTATAGGAGGTAACAGAAAAAATCTTAGATGTATATACATATGTACGTGTGTATATATATATATATATATATATATATATATATATATATTTAAATTTAAAGAGAATAAAAATAATTTTAATAAAATTATATAAACATTTAATTGTAAATATTTAGTTCGATTTATATTTAAAAAAAAATAAATATCATATATCTCGGAGTAAATTATATTAAATGAGATATACTTATAAATCTTATACTATTATTGTAATGACCTTGGATTTCTTCTAACC
CmoSSR00687	p2	(TA)11	Cmo_Chr01	5927815..5928842	TGGTAATCCTTGCCAGTTGA	59.12	TTGCTTGTGGAGTGATTTGAA	59.31	TGGTAATCCTTGCCAGTTGAATCTAAGAACCCTCATAAACACTCTAGATATGCAACTCGTAGTTCACAAATACACCTTATTGAAGAATAAGACCTTTTGATCTAAGTATATATATATATATATATATAAATCAAAATGATAAAGAATCATCCAAGGTGAAGTAAGATCCAAATTACCTTATTAATCAAATATCTCAAAGTCAAGAACACTTTTTAAAATTCAAATCACTCCACAAGCAA
CmoSSR00688	p2	(AT)19	Cmo_Chr01	5929768..5930811	GGTGGAATGAAAGGCAGAAA	60.05	ATTGGAAAGTGTCGTGGGAG	59.97	GGTGGAATGAAAGGCAGAAAAAATATATATATATATATATATATATATATATATATATATTTCTCTATTACATAGGAACACCACAAACGTTCCCATCAAGCTCCCACGACACTTTCCAAT
CmoSSR00689	p5	(CAACC)4	Cmo_Chr01	5943451..5944476	GGGCTTTGGTGACAAACTGT	60.01	CGAGAACCCAACCCAAAATA	59.79	GGGCTTTGGTGACAAACTGTATATTGGGCTTTGACTTTGGGCCTTTGGGCTTTAATTTTTTTTTTATATATTTTTGGGTTGAGCCGGGTTGACCCAATCATTTTCTTTTGGTACCCGAACCCAACCCAAATCAGATCAAGTTAAAAAAAAAATAGACCCAACCCAAACTTGAAATCCAACACAACCCAACCCAACCCAACCTTTATATTTTGGGTTGGGTTCTCG
CmoSSR00690	p4	(TTAA)5	Cmo_Chr01	5947434..5948459	TTATTGGGCCACCGATTCTA	60.28	GCGAGAGATTGAAAAGTCGTT	58.59	TTATTGGGCCACCGATTCTAGGGATTTTCAAGGTCCTCTTTCTTCAAGGAACCTCTTCCTTATCTTTCCCTCAAGTTAAAGGAATTGGTTTGGAGAAACATCTTTGAGCGTGAAACCTTAATGTTAGCTTTTTAACCCTTGATCTCATTTTAATTAATTAATTAATTAATTGATGTTTTGATGATAACAAACTACTTTTAATTATTAACTATTTTCAGTATTTTGAACGGTCTACCGTATAAGGTTAAGAATAATAATTTCAACGACTTTTCAATCTCTCGC
CmoSSR00691	p8	(TATTATTA)3	Cmo_Chr01	5947787..5948816	TGGAAGAGTACGAAAAGGGTG	59.22	GGTAGGTGAGTAACCACCAAAAA	59.33	TGGAAGAGTACGAAAAGGGTGAGTTTTTCTTATTATTATATTTCTAAATAAAATTATTTTTACAAAATATAAATTTGAATCTAACCATTACTTACGTCGATTATTATTATTATTATATTGTATTATTATATTATTATATTATTATATTTTAAATTTTTGGTGGTTACTCACCTACC
CmoSSR00692	p7	(TTCTTTG)3	Cmo_Chr01	5962337..5963363	GCCACCTGGTATTAGTGGGA	59.81	AAATTAACGGCGGTGTCAAC	59.87	GCCACCTGGTATTAGTGGGACAAATGACAGGTGTACAGTCCTTGTGTCCAATCTGAATCCTGATGTGAGTAGTATTCTTTGTTCTTTGTTCTTTGTTAGACTCCTGTTCAAGTTTTTATTTTCATGGTTGACACCGCCGTTAATTT
CmoSSR00693	p2	(TA)16	Cmo_Chr01	5965913..5966950	TGGAGATTGTGTCACGGTTG	60.57	CCAAGAATTTGCACACGAAA	59.71	TGGAGATTGTGTCACGGTTGTAAAGGCTATATATATATATATATATATATATATATATAAAGTCTTCTTGTCTTTGATGAGCCATCACATTTTGGAATTAAAAAAAATAGAATTTCTATTTTTCACATTTTGGAATTAAAAAAATAGAATTTCTATTTTTAGCTTTGTTGACATGTAAGTTTTTTCGTGTGCAAATTCTTGG
CmoSSR00694	p2	(TG)9	Cmo_Chr01	5967217..5968240	GCTTCCATCTACCCGTGAAA	60.07	CCCTTTCATGATGTTTGTCTCA	59.97	GCTTCCATCTACCCGTGAAAATGTCAACCAATAATGGAATAAATTGGGATAACCTATGATAAGAATTTACATATAATTCTTAAGAAAGACCAAGAAAGGAATAAATAATTCAGACCAACTTTCTTATAAAAATTTAAAATTTATAAATTAAGAAAGAAAATACTAAACAAAAAAAACTTAATGATGATGTGTGTGTGTGTGTGTGGTTGGATGTAAACAAATGGGAACACAAAAACTTGAAGTTGTCGTTTTGAGACAAACATCATGAAAGGG
CmoSSR00695	p2	(TA)9	Cmo_Chr01	5969160..5970183	ATGCATGGGGGTTAACACAT	59.94	CATTTGAAGACGGCAATTCA	59.66	ATGCATGGGGGTTAACACATGGAAAGGGAATAAAGGGTCATTTATATATATATATATATATGTTTTAATGTGTTTTCATGACGGTGGTCTTAGGATTGAATTGCCGTCTTCAAATG
CmoSSR00696	p5	(ATCAT)4	Cmo_Chr01	5975029..5976054	GCTTGACCATCGCAACATTA	59.69	GGTTAGGTTATGGGTAGAAAGGG	59.21	GCTTGACCATCGCAACATTATGATAAACATAATGATCGACATAATGATCGTTCGTCATTCACATGTTGTATCATAATCATATCATATCATATCATAAACATTTTGTGGTCATATCACTTCCTAACTTATCATAGTCTTAACATTCTTATACCTATCACAGTTGTATCGTTACATGAACGTATTTAGTCATATCGTTACAGGAACGTATCTTAATGCTATCGTTCTATCAATCTATCATAATCATATCCCTTTCTACCCATAACCTAACC
CmoSSR00697	p5	(TTTTA)4	Cmo_Chr01	6014276..6015301	ACGAATGAATGAGAATGTGTGT	57.04	TGGCCAACTTGATGAAAACA	60.09	ACGAATGAATGAGAATGTGTGTTTGTTATTATATTTACTAATATAATAATTTAATATTTTTTAGATCTTCCTTTTATATATATATATATATCTTCCATTTTCTCTCTCTTATCCTCTATGTTTTTCATTCTATTTTCTTTTTCTGTGTTTTTATTTTTATTTTATTTTATTTTATTTTTGTGTTTTCATCAAGTTGGCCA
CmoSSR00698	p2	(AT)13	Cmo_Chr01	6033213..6034244	GGGAAACATTTGGTGAATGAA	59.65	TGGGGATTTTGGTTGTGTTT	60.07	GGGAAACATTTGGTGAATGAATTGTGGTCTTAAAGTGTCTCAATCATTCTAACCAATAGGAAGTGGTTTTGGATTTTCTCGAGTGAGTTTTTGAGGAGAGGAGAACGAGAAACTTTTCAAAGTTTAATTACATATTTAAAACATATATATATATATATATATATATATAATAGATTATGAAGAAAAAAAATATAGTTCTAGGAATATTTTTATTACGTGTTAAACTGGAAACACAACCAAAATCCCCA
CmoSSR00699	p6	(AAAAGA)5	Cmo_Chr01	6036992..6038027	AACGGATTTCATCCTCTGGA	59.48	TCTAATGTCCCGCTGTACCC	59.96	AACGGATTTCATCCTCTGGAGGATGCGAGTTGCGAGGAATAATTCCTGGGTCCCGGGCTGAAGTAAGGAAAAGAAGAACCAGTACCTACAATCATCAATAACTAAATTACATATCATCAAAACCTTCAAGTCAACCAAAAAAATTCCATGAAAAAAATTTGAAGTTTGTTGAACAAATAGGTGGTAACAAAAGAAAAAGAAAAAGAAAAAGAAAAAGAAAAGAAAAGTGAGAGGGCTACAAAAAGATGGGTACAGCGGGACATTAGA
CmoSSR00700	p6	(CCTTTT)6	Cmo_Chr01	6040353..6041394	ATCATCTGTGATTGCCGGTT	60.35	CCAATTCAATCCAATCCACC	59.99	ATCATCTGTGATTGCCGGTTTTGCGTTCCCTTTCCCTTTCCCTTTTCCTTTTCCTTTTCCTTTTCCTTTTCCTTTTTCGCTTTTGCCTTTCTCAGACCCAAATTCTACACACCAAACCCAACGCCAAATTCCTTTTCCCATAAAAACTAAACCCTTACTTAAACCTTCACTCTTTTAGGTTTTGGCTTTGTCTCCTTCACTTTTTCGAGAGACCGTATATATATATGTTGAGGTGGATTGGATTGAATTGG
CmoSSR00701	p5	(AAATA)4	Cmo_Chr01	6069162..6070187	TGGGTAGAAAGGGATAGGTTTG	59.37	GCCGACGACCCCTATTATTT	60.17	TGGGTAGAAAGGGATAGGTTTGTGATAGATTAATAGGACGATAGCGTTAGGATATGTTCCTGTGATGATATAACTAAGGTACGTTCACGTAACGATATGACTGTGATAGGTATAAGAATGTGTAATGGAACCAAATAAAATAAAATAAAATAAAAAATAAAAAAATAATAGGGGTCGTCGGC
CmoSSR00702	p3	(AAT)9	Cmo_Chr01	6073460..6074492	GTTCGAGACTTTCGAGGACG	59.99	TCCGTCAGGGTTTTCTGTTC	60.09	GTTCGAGACTTTCGAGGACGAAAGTTCTTTTTAGGGGTAGGTAATGTAACGGAACCAAATAATAATAATAATAATAATAATAATGGGGGTCATTGGCAAAGCCGAAAACTCTGGCGAACGCTGAAGTTTTCGCTCGCACACGACCCACAAAGGGCAGCCGAAGGCTGGGATGCCAGAGAACTAGTCCTCGACCTTCAGCCACCCTGAAATGACCTGCAAAGAACAAAAACAGTGAAAAAAAAAATGAGAAGGAACAGAAAACCCTGACGGA
CmoSSR00703	p5	(AAACG)4	Cmo_Chr01	6077259..6078284	GTGTGCGAACTAGCTGGTGA	60.06	AGTCCCAAGGTGTACGATGC	60	GTGTGCGAACTAGCTGGTGAGCCCATACTCGCACGTATGGGCTGTGTGTAGAGTATATGGTACACGTCCACGATTATCCGTTAGGACAACACCGTAGGAAAAACGAAACGAAACGAAACGATAGGTCCCATCATTTCATTGCATGTGATTGTCGCATAACCCCGATAGGGGGTCACTTACTGAGTATTCTAGAAATACTCAAGCCTCGTGCTACTTTACTTTTGCAGATAAGGGCAAGGCACCCATGTGATAACGACGGCGGCATCGTACACCTTGGGACT
CmoSSR00704	p4	(GAAA)6	Cmo_Chr01	6083435..6084464	ACGCGGTAACGAAATGAAAC	60	TGGGCTAGCAATTCAACCTT	59.71	ACGCGGTAACGAAATGAAACCAACAAAATCATAAACAAATGGTGGGAGGACACATCCGTCAAAATCTGCTTGAGATTTTGGGCTTGCAACGTCGTGAACTTCGTTGCCTCTTGATTTGATTACTGCCCAACAAAACATGCATCCAAGTTACGAGTAACATAAATGAAAGAAAGAAAGAAAGAAAGAAAGAATGAAGTGAATAATTACTGAGTCTATCATTGATGTAGAAGGTTGAATTGCTAGCCCA
CmoSSR00705	p5	(CTTCT)4	Cmo_Chr01	6099396..6100421	TGGGGAATGTTTTGCTCTTC	60.05	CTCCTCCCTCCATTTTCTCC	60.01	TGGGGAATGTTTTGCTCTTCTCCATAGCCTGGAAGTACTTGGCCCTTCTCTTCTCTTCTCTTCTATTCCTAATTGGGTTTTGATTGGATGGTTTTTATAAAGAAAAGATGGAGAAAATGGAGGGAGGAG
CmoSSR00706	p3	(ATG)7	Cmo_Chr01	6099491..6100517	GGAGAAAATGGAGGGAGGAG	60.01	CCCCCAACTAGTCTCCATCA	59.92	GGAGAAAATGGAGGGAGGAGATTGAAGAGAATGATGATGATGATGATGATGGAGAAAATGGAGGGAGGAGATTGAAGAGAATGATGTGATTATTGTGGCAACCCATGTGTGGGGTTGGATGGAATGATGGAGACTAGTTGGGGG
CmoSSR00707	p7	(CATACAT)3	Cmo_Chr01	6101652..6102678	GAGTGCATCGAGGACATCAA	59.79	GGAAACGAGCACTAGCAACC	59.88	GAGTGCATCGAGGACATCAAGTACATCATACATCATCATATAACGCACGTACGTTATTATACAATATCATAGCCCATACATCATACATCATACATCATAGCTCATACATCACATATAACTAGGGTACGACATCATACGATACAGCTCATACATCGTAAACATAAATATCGCATACATCATCATACGTCATCTCAAAAATCAGAAATGGTAACCATACAATTAAGCTCTTGTTCCTTGAAAGCTGCACCAAAGGTTGCTAGTGCTCGTTTCC
CmoSSR00708	p6	(TTTTCT)4	Cmo_Chr01	6114331..6115360	CGTCGACGTTTATCCGAAAT	59.96	TCGAAATCCAACACAATCCA	59.9	CGTCGACGTTTATCCGAAATCTCGCTCTCTCCTATTTTCTTTCTTTTATCTCTTTGCAGATATTCTGACAAGTGCTGGGAGTCGTGGGCTGAAGGCTGGACGTGGTGTGGCCGTCGTTTCGCGTGGGGTCCGCAAAACTCGGTGGTCGCCGGAAAACTCACGAGTTTTCCGACGACTGAGTTTTTTTTTTTTTATCATTTTCTTTTTCTTTTTCTTTTTCTTTCTCGTTTCGTTACACACCCAACCCGACCCAACCCGAAATATAAGGGTTGGGTTGGATTGTGTTGGATTTCGA
CmoSSR00709	p7	(GTTGTAT)3	Cmo_Chr01	6173308..6174334	GTGACTCACCCGTCGTAGGT	60.03	AACGGGGTTACATTTCATGC	59.69	GTGACTCACCCGTCGTAGGTTATGCGTTGTATGTTGTATGTTGTATGTTGGCACGTGCCCGTGGGTTCGCATGTGTCATTAAATTGTATGCTAGCCTGTTATACTCGATTAAGTACGCTTGTGAAATGTGAATGTATGCTGTTTAAAGTGATATGATGTGCTATGTTTATGATGTTTATGATGTGTCTGGATTATTCTGGCGTGAATGGTACTATAATTCTGAATGTAAACAACATGTAATGATGACATGAAATCACGATAAATTGCATGAAATGTAACCCCGTT
CmoSSR00710	p2	(AT)9	Cmo_Chr01	6184219..6185242	TTGAAGCAAATATCGCAACG	59.84	GGGAGAGGGAGCCATAGAGT	59.66	TTGAAGCAAATATCGCAACGTGGATTGACGCAAAAGAGTTGTGAAAATACAAAGAAAAAATTTCTCTTTTAAAACAAGAAAACTTCGAAAAATGAAAAGAGAAAAACGTGCACAAAATACACACATATATATATATATATATTTACATTATACAAAAATATCCAGGGGATTTGGGGGTGCCACTCTATGGCTCCCTCTCCC
CmoSSR00711	p3	(AAG)7	Cmo_Chr01	6199968..6200994	TGTCAATAGCCCGTCACTTG	59.72	CCCATCATTGCTCCAAATCT	59.89	TGTCAATAGCCCGTCACTTGATAACTATGGGCGACCAAAGATATTTGTCAAATAGTTCTTTTTTATTATTGTTTCTTTTGTTTTATTGGATAATACACAAATCATAACATTTAAAATCCTAAAATGAAAGGGAGATCAAGAAGAAAAAAGAAGAAGAAGAAGAAGAAGAAACTACCAATTTTACCCTTTTATGAAAATAAACCAAAACATACGCAAGGGCGACAAAGTTTGAAAAGATGTTCCACTACATAAAAGTATTTCGTGAGATTTGGAGCAATGATGGG
CmoSSR00712	p6	(TCTTCC)4	Cmo_Chr01	6200239..6201268	TCATCCACACCCTCCTTTTC	59.9	TCAGAAAGGGGAAGCAAGAA	59.93	TCATCCACACCCTCCTTTTCACTCAGGTCCTCCTCGTCTTCCTCTTCCTCTTCCTCTTCCCTTTCAATCCATCACTCTTTTCTTCACTTCACACCATTTTCTTCCCCCCTTAAACTCCATCTTCATCCCCTTCTTCACTTCCCTCTCAATCCAATTCCATCACTAACCATTTTGCGACAATCAATTTCCCCGATCACCGCTACAAATGCTGCGTTTATGCCCAGCTTTGTATCCCCTGTTCTCTTTGTTCTTCATTTCTTGCTTCCCCTTTCTGA
CmoSSR00713	p3	(AAT)7	Cmo_Chr01	6212537..6213563	CCCAACAACCTAGCATTCAAA	59.98	GGAGAGAAGTGGGGAAAGGT	59.53	CCCAACAACCTAGCATTCAAAGTATTGAGAAGAACATACCTTCGTGATAATGCATCTGCAACAATGTTGTAATAGCTCAAAAATAAATAAAGAAATAAACTAATAAAAATAATTATAAAAATAGTTAAAATAATAATAATAATAATAATTAATTAATTAAAAAAAAAACCTTTCCCCACTTCTCTCC
CmoSSR00714	p6	(GAAAAA)5	Cmo_Chr01	6236084..6237119	TGAATCTCAACTTTGCACAACA	59.37	ATCAATTCTGGGAGTCGTGG	59.93	TGAATCTCAACTTTGCACAACATATAAGGGATGTAATGCTCGGGAAAAAGAAAAAGAAAAAGAAAAAGAAAAAGAAGAAAAAAAACTCAGTCGCCGAAAACTCGTGCCAAGTTTCGCAGACCCCACGCGAAGCGACAACCACATCTCGCTCAACCTTCAGCCCACGACTCCCAGAATTGAT
CmoSSR00715	p2	(TA)13	Cmo_Chr01	6251354..6252385	CGTGTTGGGTTATGGAGCTT	59.99	CCGTTCCATATTTTCCCTTG	59.27	CGTGTTGGGTTATGGAGCTTCTTCTTATTTATAGCTTATTCAAATGTTACATAGAGTGGAAAATGATCCTATATAGTAAACGACTATTTATAATAAAAAGCTGATAGTATATATATATATATATATATATATATGGTAAATTGATATGGAAATCAACTCAAGGGAAAATATGGAACGG
CmoSSR00716	c*	(AAAAAG)9(AAAAAGA)3*	Cmo_Chr01	6260662..6261736	ATCGGCGTGGATCTTTACTG	60.1	CGTTGTTGGTTGGGTTAAGG	60.25	ATCGGCGTGGATCTTTACTGATAACCGGCGATGGTGGCTTGAGTTAAGCATTGTCGCCGCTGATTTTTTATTGTTTTTGTTATTTGTTTATGTGTAGGGGATTTGGAATAATTTCAAACTCTCTCCGAAACAGTCAAAAAAAAGAAAAAGAAAAAGAAAAAGAAAAAGAAAAAGAAAAAGAAAAAGAAAAAGAAAAAAGAAAAAAGAAACAAGAAAAGGTTTTGAGAGGCAACAAAATAAGAAACTGATTGAAAGCCTTAACCCAACCAACAACG
CmoSSR00717	p2	(TA)9	Cmo_Chr01	6265783..6266806	CCCATTTTCCCTCCAGATTT	60.12	TTTTCTACTCGAATGGTTGACA	57.43	CCCATTTTCCCTCCAGATTTGTTTATTGAAATTTAATTTGATTATTTTTATTTTCAATTTTAAATTTCACATTAATCCCTATACTTTATTCTATTATATATATATATATATAAATATATCCTTACCAAAAACAAAAATGAAATACATTTTGAATTTTCATATCAAGAATATAACAAAAGTTGAATTGAAAGTACAATTTTCATTAATTAATATTCACACGGTTTAAATTGAATACAAGTTACCAACTAAGCCCTAAAAATAAGAAAAAAATAATATATTGTCAACCATTCGAGTAGAAAA
CmoSSR00718	p2	(AT)12	Cmo_Chr01	6315700..6316729	CATAACATCCCATGCTTCCA	59.35	TGATTATGATACGATGTGGGAA	57.84	CATAACATCCCATGCTTCCAGATATAACAATTTTCATCGTATATATATCATACCATAACATATCACATCACAATATATCATATCATAAACATGTCAATTATCGCATATCTCAGTACAATAACATGTTTCATATCATATCACAAAATATATATATATATATATATATATCCGTCATTCCCACATCGTATCATAATCA
CmoSSR00719	p3	(AAT)7	Cmo_Chr01	6342272..6343298	CAGAAGTACGGTGGACGGAT	59.99	TTGTAGGAGGTGTTGGGGAG	59.96	CAGAAGTACGGTGGACGGATAATAAAGATAGTATTAATCCAGGAGGGGGAACTATGGTGTTGGTACAGTTTAAGGAGACCTTCGGAGACCTTCCTAAAGCAGTATTATCCCAATGCGGAGCAGCTTAAGAAACAATAGGAATTCACCCATGTAATGATCGAAAATTTTTAAATAAATAAATAATAATAATAATAATAATTTAAAAATAAATAAATAAATAATGACTCTCTCTCCACCTTTTCCAAATATCTCTCCCCAACACCTCCTACAA
CmoSSR00720	p7	(CAAAAAA)3	Cmo_Chr01	6342371..6343397	CTCCCCAACACCTCCTACAA	59.96	TCATACTTTCCATCCCAATTCT	57.55	CTCCCCAACACCTCCTACAACTATCTCAAAAAACAAAAAACAAAAAAGGGCAGAGGAAAAGAAAAATAGGAGAAAGAAACGAGGTAAATATAGCAAATTTTGGAAGAGAAATATTAAGAATGAGAATAGAAATAGAATTGGGATGGAAAGTATGA
CmoSSR00721	p8	(AACAAATA)3	Cmo_Chr01	6363953..6364982	CTTGTTCATCAAACCATCGAA	58.61	GTGGGAAGGGATGAGAGGTT	60.31	CTTGTTCATCAAACCATCGAATGTTACCTTTCTATCTGTAATAGCCAAAAATAAATGAACAAATAAACAAATAAACAAATAAAAATAATTATAATAAGGTAGTTAAAATAATAATAATAAATAAATAAAAACAACCTTTCCCCACTTCTCTTCACTAACCTCTCATCCCTTCCCAC
CmoSSR00722	p3	(ATT)9	Cmo_Chr01	6371988..6373020	TTGGTGGTCTCCTGTTCCTC	60.09	TTTTAGGGTTTTGGCTACTCCA	60	TTGGTGGTCTCCTGTTCCTCACTTTCTAGTGTGCTTTCTGTCGATGTTGAAGAATTTAATTCAGATGACTCGCTAGAAAATAAATACTAATTGATTGGTTCCTTTTTTGAAGTATGTAAGCTAAATTATTATTATTATTATTATTATTATTTTTGTATAATGGTTAGAATATGTATGTTGTTCAATTATAAATATTGTGAAAATCTATCTATATGGAGTAGCCAAAACCCTAAAA
CmoSSR00723	p5	(TTTTC)5	Cmo_Chr01	6392538..6393568	GGTGTGACATGTGTCGGAAG	60	TGTGTTTGTTGGGCAATGTT	59.86	GGTGTGACATGTGTCGGAAGTTTTTGTTTTTTTTCTTTTCTTTTCTTTTCTTTTCTTTTTTTTCTTTTTTCTCTTTTCCATGTCCTTTCAAGCTCTTCCTTTATCAAACACCAAAGTAACAAAATTGAAATATCATATAATCGAATACTAGGTGGAAGTCCAAAACTTCATACCTCTAAGAAGTGATCTATATGCCGTAGTTGTTGCAACATTGCCCAACAAACACA
CmoSSR00724	p5	(TTTTC)4	Cmo_Chr01	6422943..6423968	CATTGTTCGTTGTTGGTTGC	60.01	GAGCTTGAAAGGACATGGAAA	59.3	CATTGTTCGTTGTTGGTTGCCAATTAGAGCTTTCAAGGAATCCTGCAACATTATGGAAACACATAAATCAATAATTCAAAGAGAAGTACAAAAGACATAATAGTTAAAATTGTATTGAAAGGTGTGACATATGTTGGAAGTTTTTGTTTTTTTTCTTTTCTTTTCTTTTCTTTTTTTCTTTTTTCTCTTTTCCATGTCCTTTCAAGCTC
CmoSSR00725	p4	(AATT)6	Cmo_Chr01	6427043..6428072	GGCTTTTTGGCCCTTAATCT	59.57	TCCCAACCTTACACTGTGGAC	59.88	GGCTTTTTGGCCCTTAATCTCAAATTAATTAATTTTAATTAATTTTTTATGATAACAAACCTTTCATTGTTAGCCCTTAATCTCAAATTAATTAATTTTAATTAAAATTAATTAATTAATTAATTAATTGATGTTTTGATGATAACAAACCTACCTTTAATTATTACCAGTATTTTGTCTGTAAGGTTGGGAATAACGATTTCAATGTCTTTTTTGGTTCAGTCAAATTAGAGAGTCCACAGTGTAAGGTTGGGA
CmoSSR00726	p8	(AATATAAT)3	Cmo_Chr01	6435338..6436367	TGTGAGTAACGGTCAAATGAAA	58.2	TGATGTGGCAACAAAATCAA	58.52	TGTGAGTAACGGTCAAATGAAATTCAAAATTTATTATAAATATAATAATATAATAATAATAAAAATGATGTGAGTAACTACCAAAATTTTAAAATATAATAATATAATAATATAATATAGTAATAATAAAATTCGATGTGAGTAAACGGTTATATTCAAATTTATATTTTGTAAAAATAATTTTATTTAGAAATGTAATAATAAGAAAAACTCCACCCTTTGTTACTCTTCCAATATTATAAATGTCATACTTTGATATATTTTGATTTGTCCATCATTTTGATTTTGTTGCCACATCA
CmoSSR00727	p5	(CAACC)4	Cmo_Chr01	6465835..6466860	GGGAAAAGTTTTGGTTGGGT	60.07	TCATGTGTTCCAAGTGGCAT	59.97	GGGAAAAGTTTTGGTTGGGTTGGGTTGGGTTACCAATCCAACCAACCCGAACTTTTGGGTTGGGTCAAAAAAATCCCTCAACCCAACCCAACCCAACCTGGACCATGTACACCCCTACTGAGCGTAGGTATGCAGACTATGCCACTTGGAACACATGA
CmoSSR00728	p5	(GTAGA)4	Cmo_Chr01	6474564..6475589	ATCCAACCGAAGCTGTCAAC	60.12	TGAAACGACACGATCAAAGC	59.85	ATCCAACCGAAGCTGTCAACGTCCTCATAGCATCTAAGGCTTATGCTTCTCAACTTCAAACCGAAGTTTATCCCACTAATCTTTTTCACCTCGTCAATCTATAGATTCCGACATGTAGAGTAGAGTAGAGTAGAGAGATTTGAACCTCTGACCTCTTAGTTAAAAGTATGTCTTCACTAATTGAGTTACGCTCAATTTGAGAATCTCGCTCTTTCTCTGTGAGTTGTCAGTGTGTAGTAGTAATAACATTAGAACTTTATTCACCTTTCAAGCTTTGATCGTGTCGTTTCA
CmoSSR00729	p3	(AGA)7	Cmo_Chr01	6478057..6479083	ATCATTGGGCGAGATGAAAG	60.04	TCAACGTCATGATTGGGAGA	60.05	ATCATTGGGCGAGATGAAAGGGTCATGGGGGCTCATGGATTGCTGCAGAGATTCATGTAATTCCAAAAATTTGCAGAAGAAGAAGAAGAAGAAGAAGCAGAGTGGACACGTTTTTTTGTAATGTCAGTACAACACCAAATTCCCACACTATTTCCCCTTGCGGTTCTCTCCCAATCATGACGTTGA
CmoSSR00730	p7	(AAAATAA)3	Cmo_Chr01	6479106..6480132	TACGTATGGTTGCGTTGCTC	59.76	GGGGGAGGAAGATGAGAAAG	60.01	TACGTATGGTTGCGTTGCTCACCTCAATATCGACAAATTAAAATATTAAAGAAAGAAAAAAAATATATTATTTTCAAAATAATACAGATTAAAAAAACTGTTAAAATAAAAAATAAAAAATAAAAATGATGATATTAAAAGATATTGGCATCTGATGAATAAGAGAGAAGAAGGAAAGAAAAGGTTAAAGAAAAAACGAAACTCCTAAACCTTTCTCATCTTCCTCCCCC
CmoSSR00731	p5	(AAAGC)4	Cmo_Chr01	6496943..6497968	ATGAGAAAGCAATGAACGGG	60.07	TTTTGAACAATTTTCCCCCA	60.14	ATGAGAAAGCAATGAACGGGGTGTGCTGTGAATAAAGCAAAGCAAAGCAAAGCAGAAGCATACAGAAATGGGTGTTGCTGGGCAATGGATCGTGGAGTTGAACCAAAATATGGATTATATTTTCAAACAAAAAATGGGGGAAAATTGTTCAAAA
CmoSSR00732	p4	(CAAA)5	Cmo_Chr01	6542958..6543983	ATGTTCTGACTTGGGTTGGC	59.97	TGATGAATGTTATCTCCCGGT	59.26	ATGTTCTGACTTGGGTTGGCTCGAAACCACTTCAGCTCTTGTGCCATAGTCTCAACTTGATTCTCTTGTGCATGTTTTGTTAGGAAGATTATCCTATTAATCCCCTAGAGTAGAGTTTACATTAGTACACGCTCTGCAAGTTTATTAGGGAGAGATCCTATCAATAAAAAATAACTAAAAGATAAACTAAGCATTCATGTAATCAAACAAACAAACAAACAAATTCAACCGGGAGATAACATTCATCA
CmoSSR00733	p2	(AT)30	Cmo_Chr01	6549944..6551009	CCATTTCATACTTTTCCTTCGG	59.84	TGGAATCCTCTGTCGAGCTT	59.95	CCATTTCATACTTTTCCTTCGGTTGATTTCATATATATATATATATATATATATATATATATATATATATATATATATATATATATATATTAACTTTCTTTTGTAGATGGAAAATCCAGACGACAATCCTAACATTACTGATGCACGATTAAGAGAAGTCCAACAACAAACTATAGAAAGACTAATTCGAGGAAGAGAAGAGTTGACCGATTGAATAGGAAGATTGGAGATTCAAAATCAAGCTCGACAGAGGATTCCA
CmoSSR00734	p5	(AAAAG)4	Cmo_Chr01	6554558..6555583	AACGTTATTTGGCCGCTCTA	59.74	TCAAGGATCAAGAGCTTGAAAA	59.09	AACGTTATTTGGCCGCTCTAGAGGTGAAATATCTTCACTGTTTTTTTTTTGTCTCTCTCAGATTATCGAGAAAAAAAAAAGAAAAGAAAAGAAAAGAAGAATCAGTAGGGAAAAAAAATCGGTAGTAAAAAAAAAATCAGTTCTGAGAAAAAGAAATATATTCTATTCTTATCAGTTATTTGAGTTTGTTCAAAATTTTCAAGCTCTTGATCCTTGA
CmoSSR00735	p5	(GGGTT)5	Cmo_Chr01	6601225..6602255	AACCAACCCTCGTGAACTTG	60.01	TAACAACCCAACCCGAACTC	59.83	AACCAACCCTCGTGAACTTGAGAACCCATGACTTGGGACTAGGGGTGTACATAGTTCGGGTTGGGTTGGGTTGGGTTGGGTTGAGCGATTTTTTTGACCCAACCCAAAAGTTCAGGTTGGTAGGATTGGTAACCCAACCCAACCCGAAACTTTTCACAACCCGACCCAACCCAATCCAACCCAACCCTCTATTTTTGGGTTGAGTTCGGGTTGGGTTGTTA
CmoSSR00736	p3	(AGA)13	Cmo_Chr01	6616574..6617618	ATTGACATCGTGGGAAGAGC	60.08	GGCCCCAGTACAGAAAATGA	59.93	ATTGACATCGTGGGAAGAGCTCTGGCGGAAGACCTGCATCGATGATCGGGAAAGGATATTGAATGATGGAAGAATCAGAAACTGGGAGTAGAGAAGAAGAAGAAGAAGAAGAAGAAGAAGAAGAAGAAGAATGATGATGCAATGAAGAAGGGAGGTTGGAAGAGAGGAAAGCGTAGTGGGGAAGTAAGGATGTCATTTTCTGTACTGGGGCC
CmoSSR00737	p7	(ATTTTTT)3	Cmo_Chr01	6618081..6619107	AAATGAGGCTGGAAACGAGA	59.81	AATGGGCTGATCCCTTAAAA	58.51	AAATGAGGCTGGAAACGAGATTGTATTCTCCATCCCCCTCCTCACTTTTTTATCTATAAAATTTTTTATACAAAATTTTCTATTACAAGTTATAAAAAAATCATTTTTTATTTTTTATTTTTTTGTCTTTTAAGGGATCAGCCCATT
CmoSSR00738	p5	(TCGTT)5	Cmo_Chr01	6634747..6635777	CCTTGCCCTTATCTGCAAAA	60.2	GTGTGCGAACTAGCTGGTGA	60.06	CCTTGCCCTTATCTGCAAAAGTAAAGTAGCACGAGGCTTGAGTATTTCTAGAATACTCAGTAAGTGACCCCCTATCGGGGTTATGCGACATACACATGCAATGAAATGATGGGACCTATCGTTTCGTTTCGTTTCGTTTCGTTTTCCCTACGGTGTAATCCTAACAGGTAACCGTGGACATGTACCATATACTCTACACGCAGCCCATACGTGCGAGTATGGGCTCACCAGCTAGTTCGCACAC
CmoSSR00739	p4	(TATG)7	Cmo_Chr01	6664568..6665601	TATGCCAGTGAAGGAGGGAG	60.21	GCTTCTCTCATGAACCTCGG	59.95	TATGCCAGTGAAGGAGGGAGAAGGAATAAGGAGTCTTAGGTTACAGTGAAAGAACCAACCCAGCCAGCAGTGAGACGCGAAGAGGAGAGGAATAGCGAGACAAGGGGACGAGTCATATCCGAGTGAAGGAGATAAGGAAGAAGGAAAGAAGTCTTGACTTCAAACACTTTCTTTGGAAGGAGAAAGAATATGTATGTATGTATGTATGTATGTATGCTTTACCGAGGTTCATGAGAGAAGC
CmoSSR00740	p2	(TA)19	Cmo_Chr01	6742706..6743749	TGCAGGTGTTCTGAAGATGC	59.99	GAGGGTACGGACGCATACAT	59.84	TGCAGGTGTTCTGAAGATGCTGGGCTGAGGGTGGGCGTGCTGTGGCCGTCGTTTCGCGTGGGTTCCGCGAAACTCGGCGGTCGCCGGAAAACTCGCGGGTTTTTTTTTTTTTTTTTCGTTTTCTCGTTTTCATTTATTTATTATATATATATATATATATATATATATATATATATATATTTTTTTTCTTTCTTTCTTTCTCGGGTCGTTACATGATCGTTGTCCTAACATTGGATGTATGCGTCCGTACCCTC
CmoSSR00741	p2	(AT)9	Cmo_Chr01	6746223..6747246	CTATCCCGAACTGTAACGCC	59.59	GCATTTGTTTCCTCCGAAAA	60.05	CTATCCCGAACTGTAACGCCCTGTTAGGTTTAATATATATGTAATAGAATAAAAATAACAAAATAGAGAAGATGGTTTAATATATATATATATATATTAAAATAAAAATAACAAAATAAGGAAAAAAAAAAAACTGGCCACCCCTCCTTCAATCTCTCATCCCTCCCCTAAAATACCTCTCTCATCCTGTATCAATAATTCATCAAACAAAACAGAAACAGAAAGAAAAGAAAATATTTTCGGAGGAAACAAATGC
CmoSSR00742	p3	(AAT)7	Cmo_Chr01	6747134..6748160	TCCTATGAAGAGTCCTGGAAAAA	59.25	TCTTCTCCTCCTTCCATGTATTG	59.6	TCCTATGAAGAGTCCTGGAAAAAAAATAGATAGATAAAAAAGAGATGAAGATAGAGAAAAGGAAGATCTGGAAAACATATCCAAATAAAAAAAATGAAGATTTGGAAAGTAGGATAAAAAAAAGAAAGGAAGAGAGAGAGAAAGATTGGAAAACAGATCAAATAATAATAATAATAATAATAACAAAAAAATAAAAAAACAATACATGAAAAGAAAAGAAGATAAAAACAATACATGGAAGGAGGAGAAGA
CmoSSR00743	p2	(TA)30	Cmo_Chr01	6749554..6750619	TCAGCCTCACCTTGTCCTCT	59.99	TGCCGAATGATTTTGTATGC	59.53	TCAGCCTCACCTTGTCCTCTACCTCTAATAGGAGATCGTCCCCTTCCTTGTATTACTCTTTCGCGTGATCTAGGCAGCATGGTTCTAGAAACCAAAATAGCATCTCTTAAGTCTAAGGTTCATCACTATATATATATATATATATATATATATATATATATATATATATATATATATATATATATATTATTAAAAATACATATACTAAAGTCACATTATATTGCATACAAAATCATTCGGCA
CmoSSR00744	p3	(TTA)10	Cmo_Chr01	6788788..6789823	TGGATTTGTGAGTTGGTGGA	59.94	GGAAGCGTGAGGACGAAATA	60.21	TGGATTTGTGAGTTGGTGGAGGAGAGATAGCATGCATCCTGTATTTGTTGGTGGTGGAGAGGTGGGTTGAGGAGAGATAGTTTGGGAGAGGAAGAGAGGTTAGTGGAGAGTAGTCGAGGGAAAATCATTATTTTAATTATTTAATTATTTACTTATTATTATTATTATTATTATTATTATTATTTGGATAGTTACATTATCTACCCCTAAAAGAACTTTCGTCATCAAAAGTCTCGAACTCTTACTAGCTTGGGGTATTTTTCTCTTATTTCGTCCTCACGCTTCC
CmoSSR00745	p4	(TTAA)5	Cmo_Chr01	6794849..6795874	GGGGAGGGATGAGAGGTTAG	59.89	GAAGACTAGAGAAATGTAATAGCCCAA	59.66	GGGGAGGGATGAGAGGTTAGTAGAGAGAAGTGGGGAAAGGTTTTTTTTTTTTTTTTTAATTAATTAATTAATTAATTTTTTATTATTATAATTTTAACTATTTTTATAATTATTTTTATTCGTTTATTTCTTTATTTATTTTTGGGCTATTACATTTCTCTAGTCTTC
CmoSSR00746	p3	(AAT)10	Cmo_Chr01	6795502..6796537	GGAGAGGAAGTGTAACAACCG	58.71	TTGAAGGAAGGAGGAGGGAT	60.01	GGAGAGGAAGTGTAACAACCGGTAAAAACAAGATAAAATAATAATAATAATAATAATAATAATAATAAAATAAATAAATAAATAATAAATATATATATATATATATATATATATATATATATATATATATATAAAAACATTTGGTAACCGATCCCTCCTCCTTCCTTCAA
CmoSSR00747	p2	(AT)22	Cmo_Chr01	6795554..6796603	GGAGAGGAAGTGTAACAACCG	58.71	TTGAAGGAAGGAGGAGGGAT	60.01	GGAGAGGAAGTGTAACAACCGGTAAAAACAAGATAAAATAATAATAATAATAATAATAATAATAATAAAATAAATAAATAAATAATAAATATATATATATATATATATATATATATATATATATATATATATAAAAACATTTGGTAACCGATCCCTCCTCCTTCCTTCAA
CmoSSR00748	p5	(AAACG)5	Cmo_Chr01	6797597..6798627	GTGTGCGAACTAGCTGGTGA	60.06	TGACCCGCTATTGGGTTAAA	60.31	GTGTGCGAACTAGCTGGTGAGCCCATACTCGCACGTATGGGCTGCGTGTAGAGTATATGGTACACGTCCACGATTACCTGTTAGGATTACACCGTAGGGAAAACGAAACGAAACGAAACGAAACGAAATGAAATGAAACGAAAGATAGGTCCCATCATTTTATTGCATGTGATTGTTGCATTTAACCCAATAGCGGGTCA
CmoSSR00749	p6	(TCAATT)4	Cmo_Chr01	6804884..6805913	GCCGCATCGTACGACATAGT	61.08	ACACATGGACCATTGCAAAA	59.82	GCCGCATCGTACGACATAGTTCATACATCATCATAACTCATACAATTTTCAGTCTATCCTATAGTAAGACCACTTACCTGATTAGCTTAGACTAGTATCACCAATTTATCAAGTTCGGTTTTGTTCTTTGTATCCAAGCCAACCTATATGAACCATGACATCAATTTCAATTTCAATTTCAATTCTCTAAATTTTGCAATGGTCCATGTGT
CmoSSR00750	p4	(TTTA)5	Cmo_Chr01	6808983..6810008	TGGATGAGAGGTTAGTGGGG	59.92	CGTGAACGTACCTTTGTCATCT	59.17	TGGATGAGAGGTTAGTGGGGGAGAAATGGAGAAATGTTGTTTTATTTATTTATTTATTTATTATTATTATTATTTTAACTACTCCTTTATAATTATTTTTATTTCTTTATTTCTTTATTTATTTTTGGTCTATTATAGCGTTAGGTTAAGTTCATGTGATTAGATGACAAAGGTACGTTCACG
CmoSSR00751	p4	(AGAC)5	Cmo_Chr01	6810276..6811301	AGCAAACCAGCGCTAAGGTA	60.04	CGAACTCACAGAGTGCCAAA	60.02	AGCAAACCAGCGCTAAGGTACGTCGGGCAAGGATGGACAGACGCGCCACCAGAGACAGACAGACAGACAGACGACTATTCCACTGGCGACAGTAATCAAATTCTTTGATTAGGGTTGTTGAGGCTTTTGGGCGAGGAAGACGAAGCGGCGTCTGCAGGTTGACCCTTTGGCACTCTGTGAGTTCG
CmoSSR00752	p4	(AATT)5	Cmo_Chr01	6811139..6812164	TGATTCTTGCAGTGAAACGC	60	AGAGGTGGGGGAAAGGTTTA	59.8	TGATTCTTGCAGTGAAACGCTATGTAATAGCTCAAAAATAAATAAAGGAATAAACGAATAAAAATAATTATAAAAATAGTTAAAATTATAATAATAAAAAAATTAATTAATTAATTAATTAAAAATAATAATAAAAAAATAAAAAATAAACCTTTCCCCCACCTCT
CmoSSR00753	p2	(AT)14	Cmo_Chr01	6827625..6828658	GTCGTCAGCCGTACAGGAAT	60.14	TGCAGGTGTTTTGAAGATGC	59.85	GTCGTCAGCCGTACAGGAATGCCTTACCTTAACCTGAAAAATGTAGTAGCACATGTGTAACGACTTGGGAAAGAAAGAAAGAAATATATATATATATATATATATATATATAAATAAATAAAAAATAAAATGAATTAAAAAAAATTAAATTAAATTAAAAACTCAGTCGCCGGAAAACCCGCGAGTTTTCCGGCGATCGCCGAGTTTCGCAGAACCCACGCGAAACGACGGCCACAGCAAGCTCAGAGCCCTCAGCCCACGACACCCAGCATCTTCAAAACACCTGCA
CmoSSR00754	p2	(GA)9	Cmo_Chr01	6827855..6828878	CACCTGCAAAGGGAGAAAAG	59.85	TAACACAAAACGCACCCTGA	60.15	CACCTGCAAAGGGAGAAAAGAGAGAAAAATTTCGAGAGAGAGAGAGAGAGATTTCGGACAAACGTCGGCGAGCGTCCAGTTTCTTCGACGGGCCCTCAAACCACCCTCAAACCGACACCAAACGACCTGTTACCACCATAAGAAGGATCCCTAACGAAAGCACAATAACTCAGGGTGCGTTTTGTGTTA
CmoSSR00755	p7	(ATCTTCC)5	Cmo_Chr01	6839052..6840092	TCCGTCGTTATCCTTGATGA	59.08	GGTGGAAGATGGAAGATGGA	59.86	TCCGTCGTTATCCTTGATGAAAGTCCATTGAACTCCAAGTCAACCTATGTGAGCCCATAACATCAGTTTCAAGTTTGAATTCAATAAAATTATTTCTCTAATTTAGATTGGCCATTCTTAAATTCTAATATTTACTGTTAGACGAAATTTGATGGAGTTCCTTGCTCTCTCTTATGTTTCCTGTTTTATTTTTTTTTAAATTATGTTCAACAAAATCTTTTCTCAATCTTCCATCTTCTATCTTCCATCTTCCATCTTCCATCTTCCATCTTCCACCTTCCATCTTCCATCTTCCACC
CmoSSR00756	p5	(GAAAC)4	Cmo_Chr01	6839900..6840925	TGGTGAGCTCATACTCGCAC	60.02	TCTTGAGTTGCGATGCTGTC	60.14	TGGTGAGCTCATACTCGCACGTATGGGCTGCGTGTAGAGTATATGGTACACATCCACGATTACCTGTTAGGATTACACCGTAGGGAAAATGAAACGAAATGAAACGAAAAAGAAACGAAACGAAACGAAACGAAAGGTCCCATCATTTTATTGCATGTGATTGTTGCATTTAACCCCAATAGAGGGGTCACTTACTGAGTATTTCTTTAAATACTCAAGCCATGTGCTACTACATTTTTCAGGTTAAGGCCAGGCATTCCTCTACGGCTGACGACAGCATCGCAACTCAAGA
CmoSSR00757	c*	(AAT)7(AATA)5*	Cmo_Chr01	6843690..6844733	TGTATGGACAAACGGGTCAA	59.82	TTTGTGGTTCTGGCATTTCA	60.09	TGTATGGACAAACGGGTCAATTAGTGAACCTTTAGCTAAGTGTAGAAAATTTGATTTGGAGAATAATGTAAAGCAGAAACTAGTAAAACTATTGATCTAGTAGATGGAATCATAGTAAAAATAAATAATAATAATAATAATAATAAATAAATAAATAAATAAAAATGAGAAACTATGTAAGTTTTCCAACCTTATTGTACACATGAACATTTATTTCAATGAAATGCCAGAACCACAAA
CmoSSR00758	p6	(TCAATT)4	Cmo_Chr01	6850466..6851495	TTCTTTGTATCCAAGCCAACC	59.08	GGTAAAAGGGACAACGAGAAA	58.23	TTCTTTGTATCCAAGCCAACCTATATGAACCATGACATCAATTTCAATTTCAATTTCAATTCTCTAAATTTTACAATAGTCCATGTGTTAAACTTCATGTGAGCATTAGAGACTTTATGAGTATTGAATATATATATATTTCTCGTTGTCCCTTTTACC
CmoSSR00759	p7	(ATTTTTT)3	Cmo_Chr01	6864017..6865043	GGCTTCAGCAGACTTGAAGG	60.13	GAGATTGAATGGGGAAAGCA	60.01	GGCTTCAGCAGACTTGAAGGTAATATTGTGAAGGATACTTTAATATGCATTAGTTGAGTTTAAAATGAAATTGGTTTGTTTTGGAGGTCAATTAAAAAGACCAATTGCTTTAGTTCACTACAAATGGACTAAATCGACCTATACCCTGGTTTGGTGCAGGCAATCAATTTTTTATTTTTTATTTTTTATTTTTGGATTTTGCAACCCGTAGTTTGAGTTGTCCATCTTTTGGTCATCAATAGAGTTGCATGTGTGTTTTATCTTGAAAGTGCTTTCCCCATTCAATCTC
CmoSSR00760	p3	(AAT)7	Cmo_Chr01	6874446..6875472	ACGCGTTTGGTAGTGGTAGG	60.05	GAAAACTTCAAAGTTCGCCG	59.86	ACGCGTTTGGTAGTGGTAGGGGAAGGTTTCCACACCCTTATAAATGGTGATTTGTTGTAACGGAACAAAAAAAAACATAAATAAAAAAATAAAATAAAAATAAAAATAATAATAATGGGGGTCGTCGGCTTTTAAATAAATAAAATAATAATAATAATAAAATAATAATAATAATAATAATGGTGGTCGTCGGCAAAGCCGAAAACTCCGGCGAACTTTGAAGTTTTC
CmoSSR00761	p4	(ATTT)5	Cmo_Chr01	6878615..6879640	AGAGTGTCATGGGTTGAGGG	59.96	TGTCCTGCAATTGGATGTGT	59.97	AGAGTGTCATGGGTTGAGGGTGGGCGTGCCGTGGCCGTGGTTTCGCGTGGGTTCCGCGAAACTCGGCGGTCGCTGGAAAACTCGCGGGTTTTCCGGCGNNNNNNNNNNTTTTTTTTTTTTTTTTTTTTTTTTATTACTTTATTTGATTTATTTATTTATTTATTTTTATTATATGTATATATATTTTTTCCTTTCTTTCCCGGGTCGTTACACATCCAATTGCAGGACA
CmoSSR00762	p8	(TTTTTGTT)3	Cmo_Chr01	6890023..6891052	TTGGAAGCATGAATCTGGAA	59.2	AAGCTCAGCTGATGGCATTT	59.98	TTGGAAGCATGAATCTGGAATATGAAATGAACCAGTCCATAACATTTGCATCTTAAAAGTATTTCCATTATTAGTTTTTTTATGTACCTCATGTGGTATGTTTTTTATTTTTGTTTTTTTGTTTTTTTGTTTTTTTTCATAAAAGATGTTTATTGTTATTTCATATGTACCTTGACAAAAAATTGGTAATTCTTTACCTTAGCTACTTAATCCTATATAGCCGTGCTTCAGATTCAGTTACTTTTCCTTCATATTTTGCTTCAGGATGCTCGGCCCTGAAATGCCATCAGCTGAGCTT
CmoSSR00763	p6	(GACGAT)4	Cmo_Chr01	6909102..6910131	AGGCCCACTGATGATGATTC	59.89	TCCATCATCCTCGTCATCAA	60.01	AGGCCCACTGATGATGATTCTGACCCCGACGATGCTGAAAGTGAGAGTGAGGAAGACGATGACGATGACGATGACGATGACGCGGATGATTTGGATCCAATTTTGGGTCTTGATATTGATGGGGATGGTGTGAGTGATTCTGATATGAGTAATGAGGACGATGACGACAGTGTGAGCGATGTTGATGACGAGGATGATGGA
CmoSSR00764	p2	(TA)9	Cmo_Chr01	6911661..6912684	GGTGAGTGGGACAAGCTACG	60.71	CAATAAAGCAAGTGGGGCAT	59.96	GGTGAGTGGGACAAGCTACGAGTATTTAAACTAAATGTAATAATTATTTTACTTATTATATATATATATATATATTTAAAGTAAATTCAATTATTTCAAACCAAGTGAATATAGTTTAAAGATGAATAAGAAAATGTATATGAAATATCGCTAGAGATTTGTGATGTCTAAACCGCCCCAAAATGCCCCACTTGCTTTATTG
CmoSSR00765	p4	(AAAG)5	Cmo_Chr01	6912583..6913608	TCTTGTTGCCTCGACTTTCC	60.38	GGGAGTGGATGACTCTTTCG	59.65	TCTTGTTGCCTCGACTTTCCAGTGACGTGATGAAGAGTAGGATCATGTTTCCTTCTTAGTTGTCTAATATAACACTCAAGTTCCTACCAAAATTAAATATTTGATTTTTTTTAAAATTTTAACTTTCGAGATTTTACTAAAGGTTTGAGAGATTAAATTTAAAAATAAGGTAGTGAAAAATGCTACTTGAGCATAAGGAAGAAAAAAGAAAAAAAAGAAAGAAAGAAAGAAAGAAAAGAAGTTAGGGTTTGGAATGAGAGGAAGAAGACGAAAGAGTCATCCACTCCC
CmoSSR00766	p2	(TA)21	Cmo_Chr01	6915704..6916751	TGATGGTAGAGAGGCCAAAA	58.3	TCGTTTTGATTTTGCTTACCG	60.12	TGATGGTAGAGAGGCCAAAATACTATTAACAAAATCAAAAAAAAAAAAAAAAAAAAAAAAAAAAAAAAAAAAAAAAAAAAAAAAAAAAAANTATATATATATATATATATATATATATATATATATATATATAGATAAGAGGCCAAATACGGTAAGCAAAATCAAAACGA
CmoSSR00767	p2	(AT)9	Cmo_Chr01	6925979..6927002	TTACTTGAGAGGGAGAGGCG	59.57	ACCACCACGAAAGCTACCAC	60.04	TTACTTGAGAGGGAGAGGCGTGTGGCTTGTTGAGGGCACAGAAACTCTGATACCTCGTTGGAATTCTAGTAATTACTAGCGAGTATATGTATATATATAATATATATATATATATATACTGTCTACCTGTTGGGAAGCTAGACATTAAATAAGTGGATTGATGAGGATAACTAAGCTGACATGCCGGAGTTGGCTGTTGGCACAACTGGGTGGTGCCTTACCGCACCGAAGGTGAACCCGTGGTAGCTTTCGTGGTGGT
CmoSSR00768	p2	(TA)17	Cmo_Chr01	6939902..6940941	GGAGGATGGAAGATTGAGGA	59.02	GTGGTCCACGTGTTGAACTT	58.46	GGAGGATGGAAGATTGAGGAAATCTTTTGTGAACAGAATTTAAAGACAAAACCCGAAATATCACTAGCCAAGAAACTCAATTAAATTTTGTCTAGTAACAATATCTTCCCTACAATAGTAAGAATAGAAAATAAGATATTTAGTGAAAAATAACATATTATATATATATATATATATATATATATATATATAACATTTCAAGACTCTACTCATAAAGTCTCTAATGCTCACATGAAGTTCAACACGTGGACCAC
CmoSSR00769	p5	(AGAGA)4	Cmo_Chr01	6942299..6943324	GAAAGACAAAACAGCGGTGG	60.67	ATTGTGGTTTGGTTGGCAAT	60.1	GAAAGACAAAACAGCGGTGGGAAGAACATGAGAGAAGAGAAGAGAAGAGATGAGAGGGGGTGGCGTGAAAACAATGGTTTCACGCCGTCCAAACAAACCTTTCTATTCATCTGCCACCCCACGCGTAATCAATACCTTTACTTCTTTCTATCCTTCCTTTCTCTCTTTATATATATCTATCTATCCTCTTAGTTTCATATTTTATTATGCATTCAATCTTCTCTTTCCATTTCTCTCTCTACAATTATCCATTTCTCTCTCTTCTTCTTCATTCCATTGCCAACCAAACCACAAT
CmoSSR00770	p8	(TAATTATT)3	Cmo_Chr01	6947694..6948723	CACAGCCATGGTCTTACGTG	60.18	ATTGGGGTTTTGAAATGCAG	59.8	CACAGCCATGGTCTTACGTGTTTAAATATGAAATAGTAAAATTTATAGAAAATAAAAACAAATAATTATTTAATTATTTAATTATTATTATTATTATTTTTGTATGGTTGTTACACCTACCATGTTGCATGTGACTGCATTTCAAAACCCCAAT
CmoSSR00771	p7	(TTGTTCT)3	Cmo_Chr01	6952697..6953723	AATAGACGCTCGCTCTGGAA	60.12	TGGCCATTTTTAGCGGTAGT	59.61	AATAGACGCTCGCTCTGGAACTAACTCGTTTAGATAACTCTCACGAAACTTTGAAGGGGGTGTCGAGAGGGGAGAGGGGAGAGACAAGGAGACAAAGAATTCTCAAAAAACTTTTTCTATTACACTCTCTGCACTGCTTTTTTTTTTTTTTTTTTGCTCTACTTGTTCTTTGTTCTTTGTTCTACTGCTCTGATATTACAATGAGAGGTAAAGCCTATTTATAAGTTTTACTACCGCTAAAAATGGCCA
CmoSSR00772	p5	(AACGA)4	Cmo_Chr01	6995479..6996504	GGGAAAACGAAATGAAACGA	59.92	GTCGTCAGCCGTACAGGAAT	60.14	GGGAAAACGAAATGAAACGAAACAAAACGAAAAAGAAACGTAACGAAACGAAACGAAACGAAATATAGGTCCCATCATTTCATTGCATGTGATTGTTGCATTTAACCCCATTAGTGGGGTCACTTACTGAGTATTTCTTTAAATACTTAGGCCATGTGCTACTACATTTTTCAGGTTAAGGCAAGGCATTCCTGTACGGCTGACGAC
CmoSSR00773	p5	(AGAAA)5	Cmo_Chr01	6998252..6999282	TGCATTTTAGGCTGCTCCTT	59.98	TTCCTCTCTCCCAAAACCCT	60.04	TGCATTTTAGGCTGCTCCTTAATTTGTGCATAATCCTTGCTGTGTTCTTTCTGTACAGCAGCTTCCTCATTTCTCTGTTGTGTTGTAATACCCGAATTTTTAGATAAATAAATAAAAAATAAAAATAACACATAGGGGCAAAAGGGTCATTTTGCCCCTACTCTTACCCAAGGGGTCTCGTTGTTTGGGGTCTAAAAGAAAGAGAAAAGAAAAGAAAAGAAAAGAAAAAGAGAGAGAAAGGAGAAAGGGAAGAAGTTAGGGTTTTGGGAGAGAGGAA
CmoSSR00774	p5	(AAACG)4	Cmo_Chr01	7007339..7008364	CATCCAATGACAGGACAACG	59.96	CATGCAATGAAATGATGGGA	60.28	CATCCAATGACAGGACAACGATCGTTATGCTTTGCATAGCGCTACCGTGACGGTTACTAGTTCTAGCGGGTGTCCGGCCTAAGGGGCTCCCAGAGTATGCCCATCGGATAAGGAAAGTGGCCCAGCGGTGCGAACTAGCTTGTGGGCTCATACTCGCATGTATGGGTTGTGTGTAGAGTATATGATACACGTCCAAAATTACCCGGTAGGACAGCACCGTAGGGAAAACGAAACGAAACGAAACGAAAGATAGATCCCATCATTTCATTGCATG
CmoSSR00775	p3	(TTA)9	Cmo_Chr01	7010621..7011653	TCTCCTCCTTGCATGTATTGTTT	60.01	GGGAAAAGGAAGATCTGGAAA	59.52	TCTCCTCCTTGCATGTATTGTTTTTATCTTCTTCTCTTTGCATGTATTGTTTATTATTATTATTATTATTATTATTATTTGATTTGTTTTCCAATCTTCCTCTCTCTCTTTGTTTCTTTTTTTTTATCCTGTTTTCCAAATCTTCATTTTTTTTTATTGGGATATGTTTTCCAGATCTTCCTTTTCCC
CmoSSR00776	p5	(TTTCG)4	Cmo_Chr01	7015923..7016948	CAGTCGTCAGCCGTACAAGA	60.05	GGGAAAACGAAACGAAACAA	59.95	CAGTCGTCAGCCGTACAAGAATGCCTTGCCTTAACCTGAAAAATGTAGTAGCACATGGCTTGAGTATTTAAAGAAATACTCGGTAAGTGACCCCACTATTGGGGTTAAATGCAACAATCACATGCAATGAAATGATGGAACCTATCTTTCGTTTCGTTTCGTTTCGTTTCATTTCATTTTGTTTCGTTTCGTTTTCCC
CmoSSR00777	p4	(AAAT)5	Cmo_Chr01	7029329..7030354	CAACAAAATACAAAGAGAAGACCAG	58.5	TGTATTTCCTCTTTTCTCTTCCC	57.97	CAACAAAATACAAAGAGAAGACCAGAGAAGTAGAAACTGTTAACAAACTCCAAAGAAAAAAAATATAGATAGCATGTCAAATAAAAAAAAAAAAAAGGAAATACATACAAAAATAAATAAATAAATAAATAAAAAGAGAAGGAAAGAAAGAAAAGAGGAAATACAGAAGAGAAAAATAAAAGGGAAGAGAAAAGAGGAAATACA
CmoSSR00778	p5	(AAACG)4	Cmo_Chr01	7040626..7041651	ACAATGATCGTTAGGCCCTG	59.96	GCAATGAAATGATGGGACCT	59.76	ACAATGATCGTTAGGCCCTGCATAGTGCTGCCGTGATGGTTTTAGTTTTAACAGGTCCCGGTGGGCCCCCAGAGCATGACCACTAGCTAGGGACAGTGGCCCAGCGGGGTGCGAACTAGCTGGTGAGCCCATACTCGCACGTATGGGCTGCATGTAGAGTATATGGTACACGTCCACGATTACTTGTTAGGATTACACCGTAGGGAAAACGAAACGAAACGAAACGAAATGAAACGAAACGAAACAAAAGATAGGTCCCATCATTTCATTGC
CmoSSR00779	p5	(TTATT)4	Cmo_Chr01	7042169..7043194	TGTTGGGGAGATATTTGGGA	60.13	AGGCCTCAAGTCTCGAACAA	59.99	TGTTGGGGAGATATTTGGGAAAGGTGGAGAGAGAGTCATAATTTACTTTTTTTTTCTAATTATTATTTACTTACTATTATTATTTTATTTTATTTTATTTCGGGTCGTTACACCTCTGGACGTCGCTACAAATTAGCTTGACCAGAGGGTCCAGGGGGTGTGCGAGCGCCCTGGAGATTCACACTCGCACGTGTGAGTCGTGTGTAGGGAAGTACTACACATCCAATTTGTTCGAGACTTGAGGCCT
CmoSSR00780	p3	(AAT)11	Cmo_Chr01	7044575..7045613	CAAGGCCACTTACCTGGTTG	60.54	CTCCAGCTCTCTGGGATACG	59.97	CAAGGCCACTTACCTGGTTGGCCTTAGCCGAATATTCCCTAATTTAATTAATGTAACGACACAAAAAAAAAGAATAATAATAATAATAATAATAATAATAATAATTAAATAATTAAAATAATAATTTTCCCTAAACTACTCCCCACTAACTCCTCCTTCGTATCCCAGAGAGCTGGAG
CmoSSR00781	p2	(AT)10	Cmo_Chr01	7045183..7046208	GGAAAGATTTGGGAGGAAGAA	59.52	TTGTTTACGGTATTTGGCCTC	59	GGAAAGATTTGGGAGGAAGAATTTATCAGATTTGGGAAGAAGAATTTATCTGTGATATGTGTGAATTTAAATGATAACAGAATTAAAGGAAAAAAAAAACAAGAGAAAAAGAAAGATTTGGAAAAAAAATTAATTAGAATATAAGAAAACTACAATAGAAGATTAGAGAGAAGCGAGAATATTGTTAACAAAATCAAAAGAAAAGACAAAGAAATATATATATATATATATATAGATAAGAGGCCAAATACCGTAAACAA
CmoSSR00782	c	(TTTCG)5tttctt(TTTCG)4	Cmo_Chr01	7053595..7054651	GTCGTCAGCCGTACAGGAAT	60.14	GTGTGCGAACTAGCTGGTGA	60.06	GTCGTCAGCCGTACAGGAATGTCTTGCCTTAACCTAAAAAATGTAGTAGCACATGGCTTCAGTATTTAAAGAAATACTCAGTAAGTGACCCCACTATTGGGGTTAAATGTAACAATCACATGCAATAAAATGATGGGACCTATCTTTCGTTTCGTTTCGTTTCGTTTCGTTTCTTTTTCGTTTCGTTTCGTTTCGTTTTCCCTACGGTGTAATCCTAACAGGTAATGGTGGACGTGTACCATATACTCTACACGCAGCCCATACGTGCGAGTATGGGCTCACCAGCTAGTTCGCACAC
CmoSSR00783	p2	(AT)23	Cmo_Chr01	7055690..7056741	GAAACTTTGCAGGGTGTCGT	60.16	ACGACACGGGAAAGAAAGAA	59.71	GAAACTTTGCAGGGTGTCGTGGGCTGAGGGTGGGCGTGCTGTGGCCGTCGTTTCGCGTGGGTTCCGCGAAACTCAGCGGTCGCCGGAAAACTCGCGGGTTTTCCGGCGACTGAGTTTTTTNNNNNNNNNNNNNNNNNNNNNNNNNNNNNNNNNNNNNNNNNNNNNNNATATATATATATATATATATATATATATATATATATATATATATATTTCTTTCTTTCTTTCCCGTGTCGT
CmoSSR00784	p8	(AAAAAATA)3	Cmo_Chr01	7067158..7068187	GCTATGCAGGGCATAACGAT	60.09	CAAGGTGGGTTGAGGAGAGA	60.23	GCTATGCAGGGCATAACGATCGTTGTCCTACCATTTGGATGTACGCGTCCGTACCCTCGTGATGGGATAGGGGTGTAACAGCCAAAAAATAAAAAAATAAAAAAATAAATAAAATTATTATAAAGAACAAAAAAATTATTATTATGTACAAAAAAAATAATAATAATAAATTAATAAATAAGTAAATAAAAATAATTATTCCCTCTCTCTCCTAGTCACTTTCCTCAAAAATCTCTCCTCAACCCACCTTG
CmoSSR00785	p3	(TAT)25	Cmo_Chr01	7071683..7072763	TCTGCCTTTTTCCCAGAAGA	59.93	GTGTAACGCCCGTTAGGTTT	59.02	TCTGCCTTTTTCCCAGAAGATCTATATGTCTTTCTCATCCCTAGGAAATCTTTTCTTTCTTTTTCTCTTGATGGTAGAATTATTGATGATAGATGAGGAGGTATTGTAGGATAGGGTGGAGAGATTAAAAGAGAGGTGGTCAGTTAATCTTTTTTTCATTGCTTATTTTATTATTTTTATTTTACTATTACTATTATTATTATTATTATTATTATTATTATTATTATTATTATTATTATTATTATTATTATTATTATTATTATTATTCTTAAACCTAACGGGCGTTACAC
CmoSSR00786	p5	(TTTCG)4	Cmo_Chr01	7081332..7082357	ATCCTGAGGTGTCCGATGTC	59.93	GTGTGCGAACTAGCTGGTGA	60.06	ATCCTGAGGTGTCCGATGTCGTCGTCATTGTCACATGGGTGCCTTGCCCTTATCAGCAAAAGTAAAGTAGCACGAGGCTTGAGTATTTCTAGAATACTCAGTAAGTGACCCCCTATCGGGGTTATGAGACAAACACATGCAATGAAATAATGGGACCTATCGTTCCGTTCCATTTCGTTTCGTTTCGTTTCGTTTTCCCTACGGTGTAATTCTAACAGGTAATCGTGGACGTGTACCATATACTCTACACGCAGCCCATACGTGCGAGTATGGGCTCACCAGCTAGTTCGCACAC
CmoSSR00787	p5	(AAATT)5	Cmo_Chr01	7097559..7098589	ATTGTAAGGCCCACGTTTTG	59.86	TTCTGATATGGGAAGGGACG	59.89	ATTGTAAGGCCCACGTTTTGGGCCCATGACCAAAAAAAATTAAATTAAATTAAATTAAATTAAATAAATAAACCTAGGGTTCAACAAGAGGAAACCCATCACCCCAGCCGCCACCCTTCCTTCTCTTTTCTTTTTTTTGTTTCACGTTTCTTCCTTCAGCCACAGCCACCCAATGGTCCGGCCCCGCAGCCGATTGTTTCCACACCGTTCCGCGTCCCTTCCCATATCAGAA
CmoSSR00788	c*	(TTTA)5(TTA)9*	Cmo_Chr01	7108448..7109497	AGCGGTGAGAGATTGAAGGA	59.95	GCTTGTAACAACGGGGAAAA	59.97	AGCGGTGAGAGATTGAAGGAAGGAGGAGGAATCGTTACCAAATGTTTTTTTATTTATTTATTTATTTATTATTATTATTATTATTATTATTATTTTATTTTATTTTTCCCCGTTGTTACAAGC
CmoSSR00789	p8	(GTGATGAC)3	Cmo_Chr01	7110754..7111783	TGACCTTACTATCGGCTCGG	60.23	TCACCGCATCACTATCTAACG	58.81	TGACCTTACTATCGGCTCGGTCGAAAGATTTGTCTTATGTATGACGACACGTGTCCAGTGGCCCTTGCACGTGTCATTTATGCTTCATGTTATGTGATGACGTGATGACGTGATGACGTTAGATGATGATGTGTTGCTATTGTATGATGATGTGTTGTTGTTGTATGACGATGTGATGACGTTAGATGATGATGTGTTGCTATTGTATGATGATGTGTTGTTGTTGTATGACGATGTGATGACGTTAGATAGTGATGCGGTGA
CmoSSR00790	p8	(AAATAAAC)3	Cmo_Chr01	7117988..7119017	ATGCTCGGGCCATGTAATAG	59.94	CTGAGGATGGGTTGAGGAGA	60.19	ATGCTCGGGCCATGTAATAGCCCAAAAATAAATAAACAAATAAACAAATAAACAAATAAAAATAATTAAAAAAATAGTTAAAATAATAATAATAATAAATTAATTAATTAATTAATTAAAATTAAAATTAAAATAATAAAAATAAAAAAATATTTCCCCACTCCTCTCCACTAACCTCTCATCCCTTCTCACTATTATATCTCCTCAACCCATCCTCAG
CmoSSR00791	p4	(AATT)5	Cmo_Chr01	7118056..7119081	ATGCTCGGGCCATGTAATAG	59.94	CTGAGGATGGGTTGAGGAGA	60.19	ATGCTCGGGCCATGTAATAGCCCAAAAATAAATAAACAAATAAACAAATAAACAAATAAAAATAATTAAAAAAATAGTTAAAATAATAATAATAATAAATTAATTAATTAATTAATTAAAATTAAAATTAAAATAATAAAAATAAAAAAATATTTCCCCACTCCTCTCCACTAACCTCTCATCCCTTCTCACTATTATATCTCCTCAACCCATCCTCAG
CmoSSR00792	p4	(AATT)5	Cmo_Chr01	7119449..7120474	GTGCTTCAGCGTAATAGCCC	59.87	TTGTGAGGAGGGATGAGAGG	60.19	GTGCTTCAGCGTAATAGCCCAAAAATAAATAAAGAAATAAACGAATAAAAATAATTATAAAAATAGTTAAAATTATAATAATAAAAAAATTAATTAATTAATTAATTAAAAATAATAAAAAAATAATTTTAAAAAAAAAAACCTTTCTCACTTCTCTTCACTAACCTCTCATCCCTCCTCACAA
CmoSSR00793	p5	(AAACG)4	Cmo_Chr01	7121464..7122489	TACTCACACGTATGGGCTGC	59.75	GTCGTCAGCCGTACAGGAAT	60.14	TACTCACACGTATGGGCTGCGTGTGGAGTATATGGTACACGTCCATGATTACCTGTTAGGATTACACCGTAGGAAAACGAAACGAAACGAAACGAAACAAAAAAGAAACGAAACGAACGAAATGAAATGAAATGAAACGAAACGAAAGATAGGTCTCATCATTTTATTGCATGTGATTGTTACATTTAACCCCAATAGTGGGGTCACTTACTGAGTATTTCTTTAAATACTCAAGCCATGTGCTACTACATTTTTCAGGTTAAGGCAAGGCATTCCTGTACGGCTGACGAC
CmoSSR00794	p2	(AT)11	Cmo_Chr01	7135371..7136398	CAGGTTCTTCTTGAGCCAGG	59.98	TTTTCCTCACCGTTTTCGTC	60.09	CAGGTTCTTCTTGAGCCAGGAATGTGTCTGACATCTTGTAATGTCCACTGATTTCCTACTGGAGTTTGTATTCTAATGGAACCGAAGAGAAAAAAAATATATATATATATATATATATGATGGTCGACGGCAGAGCCGAAAACTCCAGCGAACGCTGGAGTTTTCGCTCGCACACGACCCACAAAGGGCGGCCGAAGGCTGGGATGCCACAAATCGCGTCCCCGACCTTCATCCACCTTGAAAGAACCTGCAAAGAGACGAAAACGGTGAGGAAAA
CmoSSR00795	p4	(AAAG)7	Cmo_Chr01	7147158..7148191	TTTTTGGCAAAGGTATCTCCA	59.57	GCCTAATGCATGTCCCTTGT	59.96	TTTTTGGCAAAGGTATCTCCATGAAACATAGGACAAAATCTACTCGAGATATTTGACTAGTCCAAATCCATCAAAAAAAAAAAAAAAAGAAAGAAAGAAAGAAAGAAAGAAAGAATGACTTCAAAAAGAAAATAATTTTATTGGAAAGTTGACCAAAATTATTCAACTTTGGTGGAATAAGAGAGATGAACCGAGTTAAGTAGAAAAGTATTAAAAATTAGAAGAAAATAGGAAAAATATGAAATTTTGAATTAATACAAGGGACATGCATTAGGC
CmoSSR00796	p3	(AAT)8	Cmo_Chr01	7178121..7179150	CCCCCTCTCGACATCTCTTT	60.59	TTCAGATCATTTTGCGGTTG	59.66	CCCCCTCTCGACATCTCTTTCACAATTTCGTGAGTGTTATTCTAACATATTAATATCAGAGCAAGTTTTACTTTCAATAAATTGGTATCAGAGCGAGCTTTTATTTGTACACTAAATCAGTCATGGTCAATTCATCAAGTATTTTTTTTATGTTCGATTACTCTGAAAATTTTAAATAAATAATAGTAATAATAATAATAGGTAAATAATAATAATAATAATAATAATACTCTCTCTCCACTCTCTCCAAATATCTCTCCTTAGCACCTACTACAACCGCAAAATGATCTGAA
CmoSSR00797	p5	(AAAAT)4	Cmo_Chr01	7182243..7183268	ATTGAGGGTGTTCATGAGGC	59.93	GGAGGGATCCGTTACCAAAT	60.02	ATTGAGGGTGTTCATGAGGCGCATGACACTATGGGAGTTCCGCTGACCTCTGGAAGTCACTACAGATTAGTTTGACCAGAGGGTCCAGGGGGTGTGCGAACGCCCTGTGGATTCACACTCGCACGTGTGAGTTGTGTGTAGGGAAGTACTACACATCCAATTTGTAACAACCGAAAAAAAATAAAATAAAATAAAATAGTAATAATAATAATAATAATATCATAATAATAATAAAATAATAAATAAATAAATAAAAATTAAAAGAGAAAAACATTTGGTAACGGATCCCTCC
CmoSSR00798	p2	(AT)19	Cmo_Chr01	7185226..7186269	AAGCATGAGACGTTAGTAGCGA	59.2	TCTTTTCTCGCTTTGCAGGT	60.13	AAGCATGAGACGTTAGTAGCGACTCTGAATATGTGGAAATTTAGTGTAAAGACCCGAGAAAGAAAGGAATATATATATATATATATATATATATATATATATATATACATATAATAAAAATAAATAAATAAAATAGGTAAAAAAAAAAAAAAACTCAGTCTCCGGAAAACCTGCGAGTTTTCCGGCGACCGCCGAGTTTCGCGGAACCCACGCAAAACGATGACCACAGCACGCCCACCCTCAGCCCACGACACCCTGCAAAGTTTCAGAACACCTGCAAAGCGAGAAAAGA
CmoSSR00799	p3	(AAT)9	Cmo_Chr01	7188433..7189465	AAATTTCCCAAAACCCCAAG	60.03	ATTTCAATTTAGCCCCTGCC	60.28	AAATTTCCCAAAACCCCAAGTTTGTGTAGAGGGAGAATTTCTAAATTTTTTAAAAAGGTACCATTAATTGGAATCCTTCAAATTGCCTTGATGGAGTGGTTATTAACCCTTGACTCCATAAAAATGCTCCTTTAAAAAATAATAATAATAATAATAATAATAATAAGTGTCATAAGAATTTGTACGGCAGGGGCTAAATTGAAAT
CmoSSR00800	p4	(TTAA)5	Cmo_Chr01	7190958..7191983	GCATAAGGATGGGTTGAGGA	59.89	TTAAAGCACTTTCGAGGACGA	60	GCATAAGGATGGGTTGAGGAAAGATATTTGGGAAGGGATGAGAGGTCAGTGGAGAGAAGTGGGAAATGTTTTTTTTTAATTAATTAATTAATTAATTTTATTATTATTATTATTTTAACTAGTTTTAAAATTATTTTTATATATTTATTTCTTTATTTATTTTTGGGCTATTGCATTATATCCCTCTAAAAGAAACTTTCGTCCTCGAAAGTGCTTTAA
CmoSSR00801	p3	(TAT)8	Cmo_Chr01	7193223..7194252	TCCTCGTGTATCCCTCATCC	59.89	TGGGTGAATGACATAAGTGCC	60.77	TCCTCGTGTATCCCTCATCCAAGTTCATCTTAAATCATGGTTTCTTAAATTTAAGGTATCTTGACAATCTCGTAGTCCATATACCTCTAAAATTTTGACCAGACCGTAATGCCTCGTCCAAATTGTGGCTAGATACTTTTAAATCACCTCAAAACTTTCATAATTGGTTGTATTATTATTATTATTATTATTATTTTAATTTTCAACTCGTATTAAGACACGAAAGTTTTCTACCTCTCAGTACTTCCAAAGCTCAGCTTCCATTAAAGGCACTTATGTCATTCACCCA
CmoSSR00802	c	(TTTCG)4tttcatttta(TTTCG)4	Cmo_Chr01	7197135..7198190	GTCGTCAGCCGTACAGGAAT	60.14	AACTGGTGAGCCCATACTCG	60.13	GTCGTCAGCCGTACAGGAATGTCTTGCCTTAACCTGAAAAAATGTAGTAGCACATGGCTTGAGTATTTAAAGAAATACTCAGTGAGTGACCCCACTATTGGGTTAAATGCAACAATCACATGTAATGAAATTATGGGACCTATCTTTCGTTTCGTTTCGTTTCGTTTCATTTTATTTCGTTTCGTTTCGTTTCGTTTTTCCTACAGTGTAATCCTAACAGGTAATCGTGGACGTGTACCATATACTCTACACGCAGCCCATACGTGCGAGTATGGGCTCACCAGTT
CmoSSR00803	p5	(ATAAC)4	Cmo_Chr01	7198165..7199190	CGTTTTGTGCATCCTTCTCA	59.84	CATATGCCATGTGGTTCTGC	59.96	CGTTTTGTGCATCCTTCTCATATCCTATCTCAAACATCTCCTAGAGCACATCGTACCATAATTATTATCATACAATCCACATATTATAACATAACATAACATAACATATAGGAAACATATCGATCCATAGACAATTCACACATATCAATATATATGACACGTGCAGAACCACATGGCATATG
CmoSSR00804	p7	(AAAATAT)3	Cmo_Chr01	7208327..7209353	GTTGGTTACGCTGCAAATGA	59.74	ATATCGGGACAAGTCGGAGA	59.51	GTTGGTTACGCTGCAAATGATTTTCGAAAGAGATTCTGTCTTTTTTTTTTTTTAATGAAAAAATTAAAGACAAAATAGAATATTTAAATGCTAAAAAGAAAAAATATAAAATATAAAATATTTGAAGTTTTAATTTTATTACTTTGTATCTCATGATATAAATTAATTTTAAATTTAATATTCTCCGACTTGTCCCGATAT
CmoSSR00805	p6	(GATTTT)4	Cmo_Chr01	7209422..7210451	TAATTCCTCTGGCAAATGGC	60.04	AGAAATTCCGATTCTCCGCT	60.17	TAATTCCTCTGGCAAATGGCCTTTCGTGAATCCGTTTGACTTTATTGCCATTTTGTGTGCCGGTTTCGGAAGTTCTGAAACTGAAATTGTCTGTGGTGATTAATCGACTCTAGTTTTGGCTTCAATGTTTGTTTGAGATAGAGAAAACTGTTATTCGGATGTGCGGAAACTGAAATTCCGATGGAGATTTTGATTTTGATTTTGATTTTGGATCCGAATTTTATTTAGCGGAGAATCGGAATTTCT
CmoSSR00806	p7	(TTTTGTT)3	Cmo_Chr01	7227981..7229007	GCCCTTCTTTGAGGTCCATT	60.44	TATGCCAACCCAACAAACAA	59.83	GCCCTTCTTTGAGGTCCATTTATTTTCTTTGAAGCTTACATAATCGCCCTACAAAATTAGGGTACCCTTTGGTTGGGCGGCCCTTCCTTTCTTTCTTTTTCAACCACTGATTCCATTCTTCTTTTTAACTTTTTAACCTTTTGTTTTTTGTTTTTTGTTTTTTTGTTTTTTTTACTAGGATTAAAAATGTGGAGAATATAATGAGAAAATTGAATTTGAAATTGAGTGGAGTACATGGTTAGGTAAAAAGTTGGGTTCTTTTTTTGTTTGTTGGGTTGGCATA
CmoSSR00807	p3	(AAT)10	Cmo_Chr01	7229742..7230777	ATGATGCCTTTCTCCAAACG	60.07	GATGCTATTGGGACCAGAGG	59.51	ATGATGCCTTTCTCCAAACGTTGGTAGAGTGAATCATCACTTGACCCCATTACTATTGCCTGTAATAGCCCAAAATAAATAAATAAATAATAATAATAATAATAATAATAATAATATAAATAAATAAATAATAATAATAATAATAAATAAACAAATAAAAATAATTATAAAAAATATATACCTCGAAATAATAAAAATAATAATAATTCATAATTAAATAATAAAAAGGATTACTTAAAAATAAAAATAAAAATAAAATTTACCCACCTCTCTTCACTAGCCTCTGGTCCCAATAGCATC
CmoSSR00808	p5	(TTTCG)4	Cmo_Chr01	7234502..7235527	TACGCAATGAAATGATGGGA	59.89	AAGGGGCTCCCAGAGTATGT	59.96	TACGCAATGAAATGATGGGATCTATCATTTCGTTTCGTTTCGTTTCGTTTTCCCTACGGTGCTGTCCTAATGGGTAATTGTGGACGTGTACCATATACTCTACACACAGCCCATACGTGCGAGTATGGGCTCACCAGCTAGTTCGCACACGGCTGGGCCACTTTTCTTATTTGGTGGACATACTCTGGGAGCCCCTT
CmoSSR00809	p6	(CTCCCT)4	Cmo_Chr01	7248349..7249378	TGGCCATCGTAAAATTCTGA	59.11	CAATTGGACTTACAATTTGCCA	59.87	TGGCCATCGTAAAATTCTGATATTTCGTGTTAGACAAAATTTAAAGGAGCTCACTGCACTATGATATTTCCTGTTTTACTGTTAAATCCAGTTCAACAAATCTTTCCTCCATCTCCCCCCTCCCTCTCCCTCTCCCTCTCCCTCTCCCATTCTTTTCCTTCTGTAAATAGGTTTTTCAATTGTGTAAACCGATATTATTGGCAAATTGTAAGTCCAATTG
CmoSSR00810	p7	(AAAAAAG)3	Cmo_Chr01	7249199..7250225	ATTACGAAGCAGGTTGCTGG	60.27	GTCGGTGAGATATTTGGGGA	59.75	ATTACGAAGCAGGTTGCTGGGCTAGTTGCAAAGTGGTTAGGTTGGGTGTAATTACCCGAAAAAAGAAAAAAAAAAGAAAAAAGAAAAAAGAAAAAAAAGAAGATAATAATAAGAATAAGTAAATAATAATTAAAAAAAAAAAAAAAAAAAAAAAAAAGTAAATTATCACTCTCTCTCCACCTTCCCCAAATATCTCACCGAC
CmoSSR00811	p2	(GA)12	Cmo_Chr01	7253699..7254728	TAACCCCACCGTCTTTTGTC	59.83	TTGGGTGGTTTTAGGACTCG	59.96	TAACCCCACCGTCTTTTGTCAAGAAGCTTTCACTTGTTGACAAACTAAGCACTTGCTCACAAACTGTAACGACCCAGGAAAATTAAAAGGAAAAAGAAAAAGGAAAAAAAAACAAAGTCGACAACCACACCTCGCTCAGCCTTCCGCCCATAACTCCCACAACCTATCAGAGTACCTGCAAACAGAGAAAAGAAAGAAAATACGAGAGAGAGAGAGAGAGAGAGAGATTTTGGATAACGTCGGCGAGTTTCCAATTTTTCTGACGAGTCCTAAAACCACCCAA
CmoSSR00812	p4	(AATA)5	Cmo_Chr01	7254330..7255355	ATACATGGTGGGAGGTGCAT	60.08	TTTTCGGCGACTGAGTTTTT	59.86	ATACATGGTGGGAGGTGCATGGCTCGCAGCCGATCGTGTTATAAATGTGGTCAATAGGGGCACATCGACGTGAACTGCACGGCCACAAACGTTGAAGCACAACCAAACCCGCCTAGAGTAGTAGAGTAGGTGGAAAAACCGGCACCACCACTATAACGACCCGGGAAAGAAAGAAAAAAAATATATATATATATAATAAATAAATAAATAAATAAAAAGGAAAACGAGAAAACGAGAAAACAAAAAAAAAAACAAAAACTCAGTCGCCGAAAA
CmoSSR00813	p7	(TAAAACT)3	Cmo_Chr01	7268569..7269595	CGGCCTCAATAAAAATCGAA	60.03	ATCCCAGCCGCTTGAAATA	60.56	CGGCCTCAATAAAAATCGAATTCTATGTTTTCATTGTTTCTAAATTATATAGGATAATAAAACTTAAAACTTAAATTAAAGATATGTCAATATTATTAATATTTCAAGCGGCTGGGATAATTCAACATTTAATGTTATATCCACTAACAGTGTGAAATACTGCTCTAAACAGCCTCAATAAAAATCGAATTCTATGTTTTCATTGTTTCTCAATTATATAGGATAATAAAACTTAAAACTTAAAACTTAAATTAAAGATATGTCAATATTATTAATATTTCAAGCGGCTGGGAT
CmoSSR00814	p4	(AAAT)5	Cmo_Chr01	7275790..7276815	GTTTGTTGCATAACCCCGAT	59.69	GAAACTTTGCAGGGTGTCGT	60.16	GTTTGTTGCATAACCCCGATAGGGGGTCACTTACTGAGTATTCTAGAAATACTCAAGCCTCGTGCTACTTTACTTGTAACGACCCGGGAAAGAAAGGAAAAAATATATATACATATAATAAAAATAAATAAATAAATAAATCAAATAAAGTAAAAAAAAAAAAAAAAAAAAATCAGTCGCCGGAAAACCCGCGAGTTTTCCGGCGACCGCTGAGTTTCGCGGAACCCACGCGAAACGACGGCCACAGCACGCCCACCCTCAACCCACGACACCCTGCAAAGTTTC
CmoSSR00815	p3	(AAT)7	Cmo_Chr01	7293523..7294549	CATCTTCAAATTTGGCCTTCA	60.06	TAAGAGCACTTGCCCACCTC	60.4	CATCTTCAAATTTGGCCTTCAAAACTGTTAATAAAATCCCCCAAGTTCAACTTTAAAAGCAAAAAAAATCATATATTTAATATCTTGTCAAGACTCCAGAAACTAAAATCCAATAATAATAATAATAATAATCTGTTTTCTAATTTGGCCACTTGGAGGTGAGGTGGGCAAGTGCTCTTA
CmoSSR00816	p3	(ATA)7	Cmo_Chr01	7299204..7300230	AAATAACACCCCGTTCGGTT	60.46	GAAGGGGTGGAGAGATTAAAGA	58.71	AAATAACACCCCGTTCGGTTATATATAATAATAATAATAATAATAGTAAAATAAAAATAATAAAATAAAGAAGGAAAAAAAAAATAACTGACCACCTCTCTTTAATCTCTCCACCCCTTC
CmoSSR00817	p3	(ATT)7	Cmo_Chr01	7333919..7334945	ACAAGTCGAGAAAATTGGGC	59.17	AAAGAAAGATCCGTGGGTCC	60.31	ACAAGTCGAGAAAATTGGGCCGACCATGAAGAATCGAGCTAGAAGCATTAATAGTGGAGGAGTTAAGTAGAAGATTGCTATCATTGGGTACAATACAGAGATGTATTCGTGGGTTCAATAATTAAATTAATACCCTCACCACAACGTGTGCGTTGTAACTAAATAAACAAAATCATACACACAGACAGCTGTTGAACTGTTCTTGGTACGACCAGATTTTAATTTTAATTTTAAATTTTAATTATTATTATTATTATTATTTATTATTCAGTGGGACCCACGGATCTTTCTTT
CmoSSR00818	p3	(TTA)10	Cmo_Chr01	7334272..7335307	TTGACCCCTCCGTTGATTAG	59.93	CGACACGTAAGCATGCAGTT	59.93	TTGACCCCTCCGTTGATTAGGTGAGGTGGGGGGCAAATTGGTCATTCTGGTTACGGTTCGAGAATTGAAATGAAAGCTCAGACCGGGTCACTCTCTACCTCCTACGCGCCAACGAAGACCCAGCTGTATTACTTGCCACGTGTCACATTTCCACTATTAATTGTTATTATTATTATTATTATTATTATTATTAGTAAATAGTAAACCGGTTGCCTGCTTTCCAGCCAACACCAGCAGCCTCTTTTGCCCAACTGCATGCTTACGTGTCG
CmoSSR00819	p8	(AATAATTA)3	Cmo_Chr01	7335982..7337011	GAAAAACAAATACGCACGTGAA	60.04	CTCAGGATATTTGATTAAACTCAGG	57.56	GAAAAACAAATACGCACGTGAAATATTTAAAATCAAACCAATTGAATGGTCTAATTCATTAATAATTAAATAATTAAATAATTAAATAAATACATATATAGAGAAACAATAATTATACGACTTTTTATAAAAAGAAATAATTTCAATGTTCATCAAATATCCTGAGTTTAATCAAATATCCTGAG
CmoSSR00820	c	(GA)9aagagaaaca(ATGG)6	Cmo_Chr01	7341277..7342334	TCTTGCAAAACCTGCAACAG	60.03	CTTCTCACTGCCAAACTCCC	59.84	TCTTGCAAAACCTGCAACAGGAAAATGAGAGAAATGAGAGAGAGAGAGAGAGAAAGAGAAACAATGGATGGATGGATGGATGGATGGACGGACCTGGGAGTTTGGCAGTGAGAAG
CmoSSR00821	p5	(GAAAC)4	Cmo_Chr01	7347977..7349002	AGTTGGTGAGCCCATACTCG	60.13	TCGTCAGCCGTACAGAAATG	59.86	AGTTGGTGAGCCCATACTCGCACGTATGGGCTGCGTGTAGAGTATATGGTACACGTTCACGATTACCTGTTAAGATTACACCGTAGGAAAAATGAAACGAAACGAAACGAAACGAAATGAAATGAAACGAAACGAAAGATAGGTCCCATCATTTCATTGCATGTGATTGTTGCATTTAACCCTAATAGTGGGGTCACTTACTGAGTATTTTTTTAAATACTCAAGCCATGTGCTACTACATTTTTTCAGGTTAAGGCAAGGCATTTCTGTACGGCTGACGA
CmoSSR00822	p8	(TATTATAT)4	Cmo_Chr01	7358715..7359752	TGGAAGAGTAACAAATGGTGGA	59.47	CGTGAGTAACGGTCAAATGAAA	60.03	TGGAAGAGTAACAAATGGTGGAGTTTTTCTTATTATTACATTTCTAAATAAAATTATTTTTACAAAATATAAATTTGAATATAACCGTTACTCACATCGAATTTTATTATTACTATATTATATTATTATATTATTATATTATTATATTTTAAAATTTGGGTAGTTACTCACATCATTTTTATTATTATTATATTATTATATTTATAATAAATTTTGAATTTCATTTGACCGTTACTCACG
CmoSSR00823	p8	(TATTATAT)3	Cmo_Chr01	7365511..7366540	TGATGTGGCAACAAAATCAA	58.52	TGTGAGTAACGGTCAAATGAAA	58.2	TGATGTGGCAACAAAATCAAAATGATGGACAAATCAAAATATATCAAAGTATGACATTTATAATATTGGAAGAGTAACAAATGGTGGAGTTTTTCTTATTATTACATTTCTAAATAAAATTATTTTTACAAAATATAAATTTGAATATAACCGTTACTCACATCGAATTTTATTATTACTATATTATATTATTATATTATTATATTTTAAAATTTGGGTAGTTACTCACATCATTTTTATTATTATTATATTATTATATTTATAATAAATTTTGAATTTCATTTGACCGTTACTCACA
CmoSSR00824	p8	(TATTATAT)3	Cmo_Chr01	7367876..7368905	TGATGTGGCAACAAAATCAA	58.52	TGTGAGTAACGGTCAAATGAAA	58.2	TGATGTGGCAACAAAATCAAAATGATGGACAAATCAAAATATATCAAAGTATGACATTTATAATATTGGAAGAGTAACAAATGGTGGAGTTTTTCTTATTATTACATTTCTAAATAAAATTATTTTTACAAAATATAAATTTGAATATAACCGTTACTCACATCGAATTTTATTATTACTATATTATATTATTATATTATTATATTTTAAAATTTGGGTAGTTACTCACATCATTTTTATTATTATTATATTATTATATTTATAATAAATTTTGAATTTCATTTGACCGTTACTCACA
CmoSSR00825	p8	(GTGTTGGT)3	Cmo_Chr01	7373034..7374063	CTGCTGCTGCACATTATTCA	58.6	ATCCCAGTTGTGGAGAAACG	59.97	CTGCTGCTGCACATTATTCAGCTGTATTGGGGTAAAACAAAAAGAAATCATTGAGAAACAAGAAGTAAGGTTAAGCTCATTTCTATGAATAAAAAAAAAAAAAAAAAAAAAAATTAGAATCAGAAAAGCTCATCATCTGAACTCAAACATTTAGAGGAGCTTGATTTGAAAAGGATATTGGTGTTGGTGTGTTGGTGTGTTGGTGTGACATTTAGGCTAGCATTCGAAGGAGTGACCCGGACATAGGACTCGCGGCGGTCTTCGTTTCTCCACAACTGGGAT
CmoSSR00826	p3	(AGC)7	Cmo_Chr01	7377400..7378426	GTTCATGGGATTGGGAGCTA	59.89	CTGCCAGATCCAGAGAAAGG	59.94	GTTCATGGGATTGGGAGCTATATTACCTTCTGTTTCAATAATCGGTGGTTCTCTTCCTCAAGTCGGGCAGCTATTAACTCTAACTCAACTTGATGTGCCTGAAATCCACATAACCAAGAACAAAATACATTTAAAATCAACAAGAATGAGCAGCAGCAGCAGCAGCAGCATATGGTGGAAGAAGATAGCAAAAACTCACATGTTTCCTTTCTCTGGATCTGGCAG
CmoSSR00827	p8	(AAATAAAC)3	Cmo_Chr01	7388219..7389248	CGACCAACAACCTGAGAACA	59.72	GGTTAGGGAGAGAAGTGGGG	59.93	CGACCAACAACCTGAGAACACCTAAAAAAGAAAGAGAAAAACGAGTGAGTATATAAATATACCTTGTCAGAAATCCACTTGTAGGCTCTCATTGCATCATTGACCTAGCAGGCGCCAATGAGCTTTACTCTATGCTCTAGGTAAATGGCTCTTGCTATTTACAGGCTTCGTGTAATAGCCAAAAATAAATAAACAAATAAACAAATAAACAAATAAAAATAATTATAATAGGGTAGTTAAAATAATAATAATAAATAAATAAATAGAAACAACATTTCCCCACTTCTCTCCCTAACC
CmoSSR00828	p3	(AAT)8	Cmo_Chr01	7391589..7392618	GGGGTGCCTGAATAGGAGTT	60.33	TAATCCTCGTGTATCCCCCA	60.15	GGGGTGCCTGAATAGGAGTTGAAAACCAAAAAAAATAAAATAAAATAATAATAATAATAATAATAATAACGAGTTGAAAATTAAAAATAATAATAATAATAATAATAATAATACAACCAATTATGGAAGTTGTGAGGTGATTTAAAAGTATCGAGCCACAGATTGGACGAGGCATTATGGTCTGGTCAAAATCTTGGAGGTATATGGACTACGAGATTGTCAAGATACCTTAAATTTAAGAAACCATGATTTAAGATGAACTTGGGTGGGGGATACACGAGGATTA
CmoSSR00829	p3	(AAT)9	Cmo_Chr01	7391631..7392663	GGGGTGCCTGAATAGGAGTT	60.33	TAATCCTCGTGTATCCCCCA	60.15	GGGGTGCCTGAATAGGAGTTGAAAACCAAAAAAAATAAAATAAAATAATAATAATAATAATAATAATAACGAGTTGAAAATTAAAAATAATAATAATAATAATAATAATAATACAACCAATTATGGAAGTTGTGAGGTGATTTAAAAGTATCGAGCCACAGATTGGACGAGGCATTATGGTCTGGTCAAAATCTTGGAGGTATATGGACTACGAGATTGTCAAGATACCTTAAATTTAAGAAACCATGATTTAAGATGAACTTGGGTGGGGGATACACGAGGATTA
CmoSSR00830	c	(AAACG)4aagaa(GAAAC)8	Cmo_Chr01	7397726..7398796	CCGTAGGAAAACGAAACGAA	60.1	TTGCCTTAACCGGAAAAATG	59.94	CCGTAGGAAAACGAAACGAAACGAGAAAAAAACGAAACGAAACGAAACGAAGAAGAAACGAAACGAAACGAAACGAAACGAAACGAAACGAAACGAAATGAAACGAAACGAAATGAAACGAAACGAAAGATAGGTCCCATGATTTTATTGCATGTGATTGTTGCATTTAACTCCAATAGTGGGGTCACTTACTGAGTATTTCTTTAAATACTCAAGCCATGTGCTACTACATTTTTCCGGTTAAGGCAA
CmoSSR00831	p5	(TTCGT)6	Cmo_Chr01	7398422..7399457	CAGGAATGCCTTGCCTTAAC	59.71	CCGTAGGAAAACGAAACGAA	60.1	CAGGAATGCCTTGCCTTAACTTAAAAAATGTAGAAGCACATAGCTTGAGTATTTAAAGAAATACTCAGTAAGTGACCCCACTATTTGGGTTAAATGCAACAATCACATGCAATAAAATGATGGGACCTATGTTTCGTTTCGTTTCATTTTGTTTCGTTTCGTTTCTTCTTCGTTTCGTTTCGTTTCGTTTCGTTTCGTTTCTTTCTCGTTTCGTTTCGTTTTCCTACGG
CmoSSR00832	p3	(AAT)9	Cmo_Chr01	7399541..7400573	GGAAAAAGGAAGATCTGGAAAA	58.73	TCGTTTAATTCTGTTCGGCA	59.3	GGAAAAAGGAAGATCTGGAAAACATATCCAAATAAAAAAAATGAAGATTTGGAAAACAAGATTAAAAAAAAAAAAGATTTGGAAAATAGGATAAGAGAGAGAGGAAGATTTGGAAAACAAATCAAATAATAATAATAATAATAATAATAATAAATAAATAAATAAAACAATACATGGAGAGAGAAGATAAAAACAATACATGGAAGGAGGAGAAGATTAGATTTGGAAATGGTAAAGTCAAAAAAAAATGTGGGAATAGAATAAACTGCCGAACAGAATTAAACGA
CmoSSR00833	p8	(TATTATAT)3	Cmo_Chr01	7412174..7413203	TGATGTGGCAACAAAATCAA	58.52	TGTGAGTAACGGTCAAATGAAA	58.2	TGATGTGGCAACAAAATCAAAATGATGGACAAATCAAAATATATCAAAGTATGACATTTATAATATTGGAAGAGTAACAAATGGTGGAGTTTTTCTTATTATTACATTTCTAAATAAAATTTTACAAAATATAAATTTGAATATAACCGTTACTCACATCGAATTTTATTATTACTATATTATATTATTATATTATTATATTTTAAAATTTTGGTAGTTACTCACATCATTTTTATTATTATTATATTATTATATTTATAATAAATTTTGAATTTCATTTGACCGTTACTCACA
CmoSSR00834	p2	(TC)9	Cmo_Chr01	7431999..7433022	GACGACGACGCTTACGAAAT	60.28	CAGAAGACCTGCAAAGGGAG	59.98	GACGACGACGCTTACGAAATAACCCAAAACGCACCCTGAGTTATTGTGCTTTCGTTAGGGATCTCTCTTACGGTAGTAACAGGTCGTTTGGTGTCGGTTTAAGGGTGGTTTGAGGGCTCGTCGGAGAAACTGGACACTCGCCGACGTTTGTCCGAAATCTCTCTCTCTCTCTCTCTAAATTTTCTCTCTTTTCTCCCTTTGCAGGTCTTCTG
CmoSSR00835	p4	(TTTC)5	Cmo_Chr01	7432214..7433239	CTCCCTTTGCAGGTCTTCTG	59.98	TTCCATCCAAGAGAAAAACGA	59.67	CTCCCTTTGCAGGTCTTCTGAAGATGCTGGGCTGAGGGTGGGCGTGCTGTGGTCGTCGTTTCGCGTTGGTTCCGCGAAACTCGGCGGTCGCCGGAAAACTCGCGGGTTTTCCAGCGACTGGGTTTTTTTTTTTTTTTCGTTTTCTCGTTTTCATTTATTTATTATATATATATATATTTTTTTCTTTCTTTCTTTCTTTCCCGGGTCGTTACAGAACTACTCGTTTTTCTCTTGGATGGAA
CmoSSR00836	p5	(AAACG)5	Cmo_Chr01	7434634..7435664	AGTTGGTGAGCCCATACTCG	60.13	CCTTGCCGTAACCTGAAAAA	60.1	AGTTGGTGAGCCCATACTCGCATGTATGGTCTATGTGTAGAGTATATGGTACACGTCCACGATTACCTGTTAGGATTACACCATAGGAAAAACGAAACGAAACGAAACGAAACGAAAGATAGGTCCCATCATTTCATTGCATGTGATTGTTGCATTTAAACTCAATAGTGGGGTCACTTACTGAGTATTTCTTTAAATACTCATGCCATGTGCTACTACATTTTTCAGGTTACGGCAAGG
CmoSSR00837	p7	(AGGAAAT)3	Cmo_Chr01	7448484..7449510	GGAAAAACTGAGACTGAGATAAGGA	59.35	TTTCTAACTAAAGGATGGATCATGG	59.77	GGAAAAACTGAGACTGAGATAAGGAAATAGGAAATAGGAAAAACTGAGACTGAGATAAGGAAATAGGAAATAGGAAATACTGAGACTGAGATAAGGAAATAGGAAACTAACTGAGATAAGGAAATAGGAAACTAACTGAGATCTGGAGATTTACGTGAAGATAGATCTGATCAACAAGGTATGTATTAAATCTTCATTTTCTTTTATCCTATTTTTTTTAGAAATCACAACCAATTATAGTTAGATTTTTTGTTGAATTATTACCATGATCCATCCTTTAGTTAGAAA
CmoSSR00838	p6	(GCCTGT)4	Cmo_Chr01	7457613..7458642	GGTTCTTTGGGCACTCCATA	59.93	CCAGTAACAAGCCCAAGCAT	60.13	GGTTCTTTGGGCACTCCATAGTCTCAAAGGTGGTTTCCACCGCTGCAATCCACATTTGGGCTTCTATGGGGTCTACTAGGGAACCCATGAATGGTCGAGGGTCGTATCTCTTGAAATCCCTTATCTAGTTTGAACATCTAACAGGTTGTGGAGGGTTTACTGGGGCATTGGCCTGAGCAGTGGCCTGTGCCTGTGCCTGTGCCTGTACCTGTGCCAGAGCCAACGCCTGTGCCTGTGCCTGAGCCTATGCTTGGGCTTGTTACTGG
CmoSSR00839	p5	(AAAAT)4	Cmo_Chr01	7463686..7464711	GCGTTAGGGTACGTTCTTGTG	59.68	GGAAGGTGGACAGAGAGTCG	59.83	GCGTTAGGGTACGTTCTTGTGACAGTATGACTAAGGTACGTCACGTAATGATATGTCTGTGATAGGTATAAGAACGTTAAGGCTATGGTAAGTTAGAGAAGTGTAACGACCCGAAAAAAAAGAGATAATAATAATAAGTAAATAATAATTATAAAAATAAAAATAAAATAAAATAAAATAAAAAAAAGTAAATTATCGACTCTCTGTCCACCTTCC
CmoSSR00840	p2	(AT)28	Cmo_Chr01	7464451..7465512	GGGAAGAAAAGAATTAAACAAGAGG	59.91	TTCCGTTCACCAAATCTTCC	59.91	GGGAAGAAAAGAATTAAACAAGAGGTTTGGAAAAGAATTAAACAGAGAGAGAGGTAAAGAAAAATATATATATATATATATATATATATATATATATATATATATATATATATATATATTTATTTATTTATTTAATTAAGTAGAAAAGAAGAAAAGAAAGAGGTAAAGGAAAGGAAATTATATATATTTAACTAATTAAATACCGGAAAGAAAAGAGAGAGACAGTGGGAGGAAAATGGAAGATTTGGTGAACGGAA
CmoSSR00841	p2	(AT)9	Cmo_Chr01	7464695..7465718	CAGTGGGAGGAAAATGGAAG	59.52	CGGGTGTGACCAATTTATCC	60.05	CAGTGGGAGGAAAATGGAAGATTTGGTGAACGGAAACAATTTTATAGAGTAAATACATAGAGTAAAAAAAAGGATACAAGGATACATATATATATATATATATTCAATACTCATAAAGTCTTTAATGCTCGCATGAAGTTTAGCACATGAATCATGGTAGAAGTTAGAGAATTAAACATGAAATTGATGTTATGGATTCTTATAGGTTGGCTTGGATACAAAGGAAAAAATCGAACTTTCATTAAGGATAAATTGGTCACACCCG
CmoSSR00842	p2	(AT)12	Cmo_Chr01	7470635..7471664	GCGTTAGAAATCATGCCAGA	58.87	CCACGGTCTCCTTTCCTTTA	59.17	GCGTTAGAAATCATGCCAGATCTTTGAATGAGATCATAGATCTTCTCCTCTGTACCATTATTGAGAATTAGATCAACCCTTCATTTACTCAAATGTTAGAATTAAATAGGGAAGAAAAGAATTAAACAAGAGGTTTGGAAAAGAATTAAACCCATAGAGGAGAGAGAGGTAAAGAAAAAAAAAAAAAATATATATATATATATATATATATTTAATTAAGTACAGAAGAGAAGAAAAGAAAGAGGTAAAGGAAAGGAGACCGTGG
CmoSSR00843	p2	(AT)13	Cmo_Chr01	7470789..7471820	TAAAGGAAAGGAGACCGTGG	59.17	CATGTGCTAAACTTCATGCGA	59.89	TAAAGGAAAGGAGACCGTGGGAGGAAAATGGAAGATTTGGTGAACAGAAACAATTTTACAGAGTAAATACATAGAATAAAATAAAAGGATACAAGGATATATATATATATATATATATATATTCAATACTCAAAGTCTTTCATGCTCGCATGAAGTTTAGCACATG
CmoSSR00844	p2	(TA)24	Cmo_Chr01	7475993..7477046	TTGTTCTTTGTATCCATGCCA	59.03	CAGTGGAGGAGGAAAATGGA	60.04	TTGTTCTTTGTATCCATGCCAACTTATATGAACCATGACATCAATTTCAATTTCAATTCTCTAAAATTTATAATGGTCCATGTGTTAAACTTCATGTGAGCATTAGAGACTTTACGAGTATTATATATATATATATATATATATATATATATATATATATATATATATATTCCTCCTTTTTACTCTATGTATTTGCGAATTTATTTTAATTCTGCTCATCAAATTGTTTCTGAATTTATTTTAATTCTGCTCACCAGATCTTCCATTTTCCTCCTCCACTG
CmoSSR00845	p2	(TC)10	Cmo_Chr01	7482441..7483466	TGTGGGCCCTTAAGATTCAA	60.44	GAGGGCTTGCAAGAGAATTG	59.96	TGTGGGCCCTTAAGATTCAAGTATCTGTGTAATTACTCTTTCTCTCTCTCTCTCTCTCTCTGATATCTGAGCCAATGGGAAACCCTTAATGCAACTCTTTGGTCCTCTTGTACTTATCAAGTTCTTAATGGAAAATGCTTGTTTCTTTTTTCTTTTTCATTTTTTTTTTTTAGAAAAATAGTTATTCAAAAAATGTTTTCATAAGATGTTTGTTCTATAAAAAAGAGAACTATTTTCAAATCAATTCTCTTGCAAGCCCTC
CmoSSR00846	p5	(AAAAG)4	Cmo_Chr01	7501442..7502467	TCCTCCAATTTCCTCTTCCC	60.38	TTGGTTCCGAGATTAACTCCA	59.55	TCCTCCAATTTCCTCTTCCCCTAAAGGAAGGATGAAGCACTAAGGAGAAAAAAAAAAAAGAAAAGAAAAGAAAAGAAAAAAGGAACGAATGAAGAGAGGAAACATATTTGGAGTTAATCTCGGAACCAA
CmoSSR00847	p4	(AATA)5	Cmo_Chr01	7516641..7517666	ACCAACCCGATATGCTTCTG	59.96	CGTTAATAGGGTGAGATGAGGG	59.85	ACCAACCCGATATGCTTCTGATTCACTGTTTGTCCATTTAAACTGTAACAGCCCAAATAAACAAATAAAAATTATTATTATGTAAAAAAAAAAAATAATAAATAAATAAATAAATAATAAAGAAGTAACTAAAAACAATTATTCCCTCATCTCACCCTATTAACG
CmoSSR00848	p7	(ATAAAAA)3	Cmo_Chr01	7520456..7521482	TTCGACACTCTGTCACCTCG	60.02	TAATTGTGGGGAGGGATGAG	59.74	TTCGACACTCTGTCACCTCGTTCTTTTGAACTTTGCATATGTGTAATAGCCCAAAAATAAATAAAGAAAAAAACGAATAAAAGTAGTTAAAATTATAATAATAAAAAAAAATGAATGAATTAATTATAAAAAATAAAAAATAAAAAAATAAACCTTTCCCCCCTCTCATCCCTCCCCACAATTA
CmoSSR00849	p2	(TC)11	Cmo_Chr01	7526071..7527098	CAGACGGTAGGATAGGAAAGAAAA	60.02	CCGTCTGTAATAATCAGATCCCA	60.21	CAGACGGTAGGATAGGAAAGAAAATTTTATCCTAAATTTCTCTCTCTCTCTCTCTCTCTCTTTTTTTATTTTTTATTATGTAAATAGGTTTTTCAATTGTGTAGACGAATATTACTAGTCAATCTTTTAACTTTATTTCGTATAACTAAAATGCTAACGAAAATTTAATAATTGTATATGGGATCTGATTGTTGTAAGATAGGAAATGGGATCTGATTATTACAGACGG
CmoSSR00850	p3	(ATT)7	Cmo_Chr01	7526545..7527571	TTGGCTTAAGATGGGTGAGG	60.07	TGGCCTATGTGTTTGAGTCG	59.72	TTGGCTTAAGATGGGTGAGGAGAGATAATGGTTGGAAGGGATGAGAGGTGTGGGGAAAGATTTTTTTTTTTATTTTAATTAATTAATTATTATTATTATTATTATTTTAATTATTTTTTTATATTTTTTTTATTTGTTTATTTGTTTATTTATTTTTGGGCTATTAGATATAAAGTCTTTGTTGGTACGACTCAAACACATAGGCCA
CmoSSR00851	p2	(AT)14	Cmo_Chr01	7553301..7554334	AATCAGAGAGTTCGGGAAAAA	57.92	TACGAACTTTCGGTTCCTGG	60.1	AATCAGAGAGTTCGGGAAAAAAAATTAAAGAGAGAGGAAAATGACTAGAGAGAGGAGAAGAGGAAAAATGAAGATTTGGTGAACACAATTAAAATAAATATTGAAACAATTTGACCGACTATATACATAAGAAGATTAGAAATATATATATATATATATATATATATATTTAATACTCATAAACTTTTCAAATCGAGTTAACGATCCTGTCTCATAAGAAAAAAAAAAGTTTCAATGTTAACCCCGTGTAATTTGACTGCAAAATGGCCAGGAACCGAAAGTTCGTA
CmoSSR00852	p6	(AAATTG)4	Cmo_Chr01	7553643..7554672	CCAGGAACCGAAAGTTCGTA	60.1	TCCAAGCCAACCTATGTGAA	59.12	CCAGGAACCGAAAGTTCGTAAGTTTTGAATTTTAACCCAACATGTGTAAGATTCATCAAATTTGAGCGTTCCTTAAAGATTCGTAGAAAAAGATCGAAAGAAACAAAAGTTTTTTCACATAATGATTTAAGTGCCTCTACGAGGGTCTTCTCGATTGGTTTGAGGTTGTCTAATACTTACATGAAGTTTAACATATGGACCATTGTAAAATTTAGAAAATTGAAATTGAAATTGAAATTGATGTCATGGTTCACATAGGTTGGCTTGGA
CmoSSR00853	p5	(ATAAC)4	Cmo_Chr01	7556583..7557608	GTGCATCCTTCTCGTACCCT	59.17	AAGCGAGCCAGGTAAGTGAC	59.5	GTGCATCCTTCTCGTACCCTATCTCAAACATATCCTTGAGCACATCGTACCATAATTATTATCATACAAACCACATATTATAACATAACATAACATAACATATAGGAAGCATATCGATCCACAGACAATTCACACATATCAATATATATGACACGTACAGAACCACAGGGCACGTGTCAACATCAAATATAACCATGCCGATAGTAAGGTCACTTACCTGGCTCGCTT
CmoSSR00854	p3	(AAT)8	Cmo_Chr01	7580025..7581054	TCCAACTGAACAGGCCTACC	60.11	GGATGAGAGGTTGGTGGAGA	60.05	TCCAACTGAACAGGCCTACCGCCCAAATACCTGCGCTAATAACCAAAAAAAAGAAAAAATAATAAACAAATAAAATTAATTATAAAAAAATATATATGTCAAAATAATAATAATAATAATAATAATAAATAAATAACTAAAAATGATTATTTAAAAAAATAAAAAATAATAAAACGTACCCACCTCTCTCCACCAACCTCTCATCC
CmoSSR00855	p2	(AT)13	Cmo_Chr01	7599978..7601009	GTGATTTGTTCTCCTCCCCA	59.9	TGACCACGAAGTGTTTACGC	59.76	GTGATTTGTTCTCCTCCCCAACCAATGTGGGACATCACATCACATATCTCGTACCATAACATATTTCATATCATATGACGACATATATATATATATATATATATATATCCGTCATTCACATGTCGTATCATAATCATATCATAGCGTAAACACTTCGTGGTCA
CmoSSR00856	p5	(AAACG)4	Cmo_Chr01	7601851..7602876	GTGTGCGAACTAGCTGGTGA	60.06	CCTTGCCCTTATCTGCAAAA	60.2	GTGTGCGAACTAGCTGGTGAGCCCATACTCGAACGTATGGGTTATGTGTAAAGTATATGGTACACGTCCACAATTACCCGTTAGGATTATACCTAGGTAAAACGAAACGAAACGAAACGATAGGCCCCATCATTTCATAGCATGTGATTGTTGCATAACCTCGATAAGGGGTCACTTACTAAGTATTCTAGAAATACTCAAGCCTCGTGCTACTTTACTTTTGCAGATAAGGGCAAGG
CmoSSR00857	p3	(ATA)9	Cmo_Chr01	7606136..7607168	TGTTAGATGTAACGACCCGAAA	59.51	TTTTGCAGTATGAGGAGGGG	60.07	TGTTAGATGTAACGACCCGAAAAAAAAAGATAATAATAATAATAATAATAATAATAAATAAATAAATTATGGTCTTTCTCCACCTTCCCCAGATATCTCCCCAACCCCTCCTCATACTGCAAAA
CmoSSR00858	p4	(AATA)6	Cmo_Chr01	7640608..7641637	ATACGTGCGAGTATGGGCTC	60.13	GTTAGGGGAGAGAAGTGGGG	59.93	ATACGTGCGAGTATGGGCTCAACAACTAGTTCGCATACTGCAGAGCTACTTTCCTTGTCGGGCGAGCATACTCTGTGTAATAGCCAAAAATAAATAAACAAATAAACAAATACAAATAATTATAATAACGTAGTTAAAAAAATAATAATAAATAAATAAATAAATAAATAAAAACAACATTTCCCCACTTCTCTCCCCTAAC
CmoSSR00859	p2	(AG)10	Cmo_Chr01	7647299..7648324	GAAATCGTTTGACGGGAAGA	60.05	GTAGTTGGCCACTCTCCACC	59.58	GAAATCGTTTGACGGGAAGAGAGAGGAAAGTCGTTGGAAGAAAATAAAACGCGTAAAAATAACAGAGAGAGAGAGAGAGAGAGAATTGCAATTTGATTTGCTAGAAAAGGAGGTGATTTTTTCTTGTCAACGGATTCACCTATTTAAACAATTAACTATCCTAAAAATGGTGGAGAGTGGCCAACTAC
CmoSSR00860	p4	(AATT)5	Cmo_Chr01	7659771..7660796	TCCGCAAAATCTGCATCATA	60.18	TTTCCCTTCAACCACCTGTC	59.94	TCCGCAAAATCTGCATCATAATATCCGAATATTCTTTTAACGACATGTAAATGAGATTCCTTAGGATAAGATTGAAACCTAGCACATAGACATACACTAAACATAATGTCAGGTTGTAATAACCCGAAAATAATAAATAAATAAATTAATTAATTAATTAATTAAATAAAAATAAAAATAAATAAATAATAATAATAATAATAAATAAAAAAGAAAAGAAGACAGCAGCAGCTTGAAGCTGCTGCCATGGAGAAAGGAAGAATGGACAGGTGGTTGAAGGGAAA
CmoSSR00861	p2	(TA)12	Cmo_Chr01	7666995..7668024	GGGTTAGAAAATACAACACCCTAGA	58.96	TCACATCAAACAAAGCAGCA	58.99	GGGTTAGAAAATACAACACCCTAGAAAATATATATAATATATATATATATTATTTTAAATAAATATTAAAAACATTTTAAATTCATTTCTATTATATATATATATATATATATATAAATTATTTTAAATAAATATTAAAAACATTTTAAATTCATTTGTATTATATATATATATATATTAATGAAGATGTCATTGAATTGTATGCCAGTTTAATGTGCTTAAGTACGAACTCATGTGAACGTGAATGTATGCTATGTATGCTGCTTTGTTTGATGTGA
CmoSSR00862	p2	(AT)11	Cmo_Chr01	7688894..7689921	ATTGATGTGAGGCCTTTTGG	59.93	ATGGGCCAAATTTATGAGCA	60.29	ATTGATGTGAGGCCTTTTGGGGAAGCCCAATGCTTATCATACCATTGTGGAGAGTAGTATTGGTCTAACCATTTCCAATGTTATCACTTACTTTCTAGACTTTATTTACATTTCTATGAAATTCCTTTATTCCAAAAAAAAAAAAAATACATATATATATATATATATATATTTGGTATAAATAAATAAGATTATGCACGTTAATTAATGAATATTTATTCATTATTAGAATGCTCATAAATTTGGCCCAT
CmoSSR00863	p2	(CT)12	Cmo_Chr01	7689592..7690621	GCAGTTCCCGTTTCCAAGTA	60.11	TAAGAGTGAAAGTCGGCGCT	60.15	GCAGTTCCCGTTTCCAAGTAACCTCTCTCTCTCTCTCTCTCTCTCTTAACATCTGTGGAATTGGATTAGGGAGAGAGATACACACATTGGCTTCCCCTTCCCGCTTCTTCAGCTATATAAATACCAGCTGTTGACAACTGCGGATTTTTTTTTCTCCTTTTTCCTTATTTTTTTCCCTACTCTCTCTCTCCTAGTTTCTTCCTTCTCCGGCGAGGATTTCCCGGCGAGAGCGCCGACTTTCACTCTTA
CmoSSR00864	p2	(AT)11	Cmo_Chr01	7704331..7705358	AGTATCCTGATGGTGCTGGG	59.95	GTAACGACCCGGGAAAGAA	59.92	AGTATCCTGATGGTGCTGGGTGTCGTGGGATGAGGGCTGGGCGTGCTGTGGCCGTCGTTTCGAGTGGGTTCCGCGAAACTCGGCGGTCGCTGGAAAACTCGCGGGTTTTCTGGCGACTGAGTTTTTTTTTTCTCGTTTTCTCGTTTTCCTTTATTTATTTATTTATTATTATGATATATATATATATATATATATTTTCTTTCTTTCCCGGGTCGTTAC
CmoSSR00865	p2	(TC)14	Cmo_Chr01	7706636..7707669	GGGCTTTTCGGAGGAATTAG	60.03	CACACCTCACTCAGCCTTCA	60.02	GGGCTTTTCGGAGGAATTAGAAATTCGCCGACGTTATTCAAAATCTCTCTCTCTCTCTCTCTCTCTCTCTCGTATTTTTGTCATTTTCTCTATTTGCAGGTACTCTGATCGATTCTGGTAGTCGTGGGCTGAAGGCTGAGTGAGGTGTG
CmoSSR00866	p2	(GA)9	Cmo_Chr01	7721548..7722571	CCACCATCAGCCCAGTATCT	59.95	AATAGGTCGTTTGGTGTCGG	59.85	CCACCATCAGCCCAGTATCTTCAGAACACCTGCAAAGGGAGAAAAGAGAGAAAATTTCGAGAGAGAGAGAGAGAGATTTTGGACAAACGTCGGCGAGTGTCCAGTTTCTCCGACGAGCCCTCAAACCACCCTTAAACCGACACCAAACGACCTATT
CmoSSR00867	p2	(TA)9	Cmo_Chr01	7724062..7725085	CATGTGGTGCATGCTGAGTA	59.28	GTCCTCCGGACATGGTTCTA	59.93	CATGTGGTGCATGCTGAGTAATTTTGTTAATAGCATGATATGATGCTTAGCATGGTGAATGTTTACTTCTTTGGCGTTACGATGTATTGTATAGTGTGCGTATTGTTATATATATATATATATATGCATAGTATTAAGGCCTTAGACTTAAGCAACCTTATATTGGTTTATAGAACCATGTCCGGAGGAC
CmoSSR00868	p2	(GA)9	Cmo_Chr01	7729210..7730233	TAATGTAACGACCCGGGAAA	60.18	CGTCGGAGAAATTGGACACT	60.11	TAATGTAACGACCCGGGAAAGAANTATATATATATATAAATAAATAAATGAAAACGAAAAAAAAAAAAAAAACCCAGTCACCGGAAAACCCGCGAGTTTTACGGCGACCGCTGAGTTTCGCGGAACCCACGCGAAACGACGGCCACAGCATGCCCACCCTCAGCCCAACATCTTCAGAACACCTGCAAAGGGAGAAAAGAGAGAAAATTTCGAGAGAGAGAGAGAGAGATTTTGGACAAACGTCGGCGAGTGTCCAATTTCTCCGACG
CmoSSR00869	p5	(TTTCG)4	Cmo_Chr01	7738611..7739636	ATGCGACAAACACATGCAAT	60	CCGTGGCGGTTTTAGTTTTA	59.99	ATGCGACAAACACATGCAATGAAATGTTGGGACCTATCGTTCCGTTTCGTTTCTTTTTCGTTTCGTTTCGTTTCGTTTCATTTCGTTTTTCCAACGGTGTAGTCCTAACAGGTAATCGTGGACATGTACCATATACTCTACACGCAGCCCATATGTGCGAGTATGGGCGCACCAGCTAGTTCGCACACCGCTGGGCCACTGTCCCTAGCCGGTGGGCATGCTCTGGGGGCCCACCGGGACCGTTAAAACTAAAACCGCCACGG
CmoSSR00870	p2	(TA)11	Cmo_Chr01	7743390..7744417	TCCTCTTCATGATGGACGTG	59.63	GGAAGATTTTGAGCGCTTTG	59.96	TCCTCTTCATGATGGACGTGCATATATATAAAATAGTGTGACAGCTTGAGGTTGACCTTCTATATATATATATATATATATATCAAATGTTTGAAGCATCAAAAGGCAGCAACCTTTGTTCGTTAGATTTGGTGAATTGTGATGTTGTTGCAGACGGAACACAAGCCCTCTCCAACGCTAACATTTCAAGCGAAAGGAAGTAGGCGTGGCCGTTATTGGAACGACGGAGCTGTTTTTTGTAACGTCAAAGCGCTCAAAATCTTCC
CmoSSR00871	p3	(TTA)7	Cmo_Chr01	7751841..7752867	ATAGAGGGGTCACCCAGGAG	60.33	GGGTTGTAGCCCATTAGCAA	59.96	ATAGAGGGGTCACCCAGGAGCGCCAATCCGTTTTTATATTTTGAGTAATTTTGTAATTCAATTTGTAACTATATCCCAATCTATTTTTCTCTGTAATAAAAAGTAACAGCATCATCTTGTAATTGAATTTTGTTTTATTATTATTATTATTATTAAGGTGTTGTTTGCTTTATTTTCACAGAGTATGATTTTTTTTATAACTATTTAAATTTTTTTTTTTTGTTAGATTCTCGTGAATCATAGTTGCTTTAGTTAGACCCATACCTTGCTAATGGGCTACAACCC
CmoSSR00872	p2	(AT)12	Cmo_Chr01	7778668..7779697	AGTGGGGAGGAAAATGGAAG	60.3	CCTACCAGGGTTCATGTGCT	59.99	AGTGGGGAGGAAAATGGAAGATTTGGTGAACAGAAACAATTTTACAAAGTAAATACATAGAGTAAAAAAAAGATACAAAGATATATATATATATATATATATATTCAATACTCATAAAGTCTTTAATGCTGGCATGAAGTTTAGCACATGAACCCTGGTAGG
CmoSSR00873	p2	(AT)11	Cmo_Chr01	7784829..7785856	AGTGGGGAGGAAAATGGAAG	60.3	CGGGTGTGACCAATTTATCC	60.05	AGTGGGGAGGAAAATGGAAGATTTGGTGAACAGAAACAATTTTACAAAGTAAATACATAGAGTAAAAAAAAGATACAAAGATATATATATATATATATATATTCAATACTCATAAAGTCTTTAATGCTGGCATGAAGTTTAGCACATGAACCATGGTAGGAGTTAGAGAATTAACCATGAAATTGATGTTATGGATTCTTATAGGTTGGCTTGGATACAAAGGGAAAAATCGAACTTTCATTAAGGATAAATTGGTCACACCCG
CmoSSR00874	p2	(AT)9	Cmo_Chr01	7806028..7807051	ATGTCTCCCGTTGAAGATGG	59.93	TGGTTAAGAGAGACTACTGTATCGAA	57.86	ATGTCTCCCGTTGAAGATGGGTTTGGAATGCCTTTTGGTTTTATGAACTTTGTTTTAAAAATAATTTCAATAAAGGTTTTTTAATATTTTTTTAAAAAAAGTTAGGCGAATAATATATATATATATATATTTTTTACACTATATTCAAATTGATCCTATTAATTAAAAAAATCGAACCTTTTTATGATTATTCGATACAGTAGTCTCTCTTAACCA
CmoSSR00875	p4	(TTAT)5	Cmo_Chr01	7831775..7832800	TTCGGAAAAGAAACATTCGG	60.05	CCATTGGAACACAACGAAGA	59.54	TTCGGAAAAGAAACATTCGGAGGGTGGAAGTAGGGAAGTGGTGAGGATAATTAATGCATTTGTGGGATTTTGACTAAATTTTATTTAAAAAATATTCCTTATTTATTTATTTATTTATTTAATAGTCTTCGTTGTGTTCCAATGG
CmoSSR00876	p2	(TA)10	Cmo_Chr01	7832706..7833731	TGCTAGCTGTCAACCCTCCT	60.01	GCTTTGATTTCAAAAGTTGGG	58.73	TGCTAGCTGTCAACCCTCCTTAAATGTCCTCAAAATTATTATTATTTTTTTTAATATAATTTTTTTAAATAATTTAAACACATTATATTATACTAATCACTTGTTTAAAGTGGGTCCTAAATTAGATACCTTAATTACAAGGTAATAGATTGAATAGTTTTCTTTAAAAAAAAAAAGTATATATATATATATATATAGATATATAGATATAGATATAAATTCAATCACTTTCTTCAACTTTTTTTGAATTAAAGAAAAGCCTCTACTTTTGTTCCCAACTTTTGAAATCAAAGC
CmoSSR00877	p2	(AT)10	Cmo_Chr01	7849636..7850661	CACGTGTAATGACCCGAGAA	59.57	TGCAGGTGTTCTGAAGATGC	59.99	CACGTGTAATGACCCGAGAAAGAAAGAAATATATATATATATATATATAAAATAAAAAAATAAAATAAATTAAAAAAAAAAGAACTCAGTCGCCGGAAAACCCGAGTTTTCTGGCAACTGCCGAGTTTCACGGAACACACGCGAAACGACGGCCACAGCACGCCCAGCCTTCAGCCCACGACACCCAGCATCTTCAGAACACCTGCA
CmoSSR00878	p2	(AT)9	Cmo_Chr01	7865234..7866257	CATGTCAAAACAGAGAGGTCTGA	59.39	CCCCGGTTGTTCTCTTTTCT	60.47	CATGTCAAAACAGAGAGGTCTGAAAAGAATTAAAGAGGGAAGAAAAGGGAAAAAAACACCCGAAAAAGAATTAAAGAGAGAGGAAAAGAAAAAAAATAATAATAATAGAAAGGAAAAGAAAAAATAATAATAATAGAGAGGAAAAGAATTAATCAAAGAGATATGGAAAGAATTAAAGAGAGGTAAAGAAATATATATATATATATATTTAACAAAGTAAATATAGAAAAGAAAAGAGAACAACCGGGG
CmoSSR00879	p8	(ATGTGATG)4	Cmo_Chr01	7865643..7866680	CCAGAGGCTCTTGAACGTGT	60.44	ATCAAGCATACCGCGTCATT	60.5	CCAGAGGCTCTTGAACGTGTCATTTATACTTTATGTTATGTGATGATGTGATGATGTGATGATGTGATGATGTTAGATGATGATGTGTTGATGTTGTATGATGATGTGATGACGTTAGATAGTGATGCGGTGATGTTATATGATGATGTGATGTTGTTATATGATGATGTGATAATGTTATGTGATGACATGATGACGTTAGATGATGATGCGATGATGTTATATGATGACTTGATGATGTTAGATAATAATGTGATGATGTTATATGAATGACGCGGTATGCTTGAT
CmoSSR00880	p2	(AG)12	Cmo_Chr01	7877902..7878931	AGGGCGTTAGTGGAGAACCT	60.13	AGAATCTTGTCCGGGGTTTT	59.8	AGGGCGTTAGTGGAGAACCTACAAATACATAAAACTTTTTCAACATTTGCAGTCTCCTTTTTTATCAAAAAAACAAATTCATTGATGTATGAAATTTAGAATAGAGAGAGAGAGAGAGAGAGAGAGAAAGCCCCCCCAAAAAAAAAAAACGAGAGGAAAATTGAGAATTTAGTTTACACCTAAATAAAGAAAGGAAAGGAACATTATCATAAAAAACCGGATAGGTTTTTTCCTAGGCCTAAAAAGTTCTATGGTTTCTTTCAATCCAAACTGACCACAAAACCCCGGACAAGATTCT
CmoSSR00881	p2	(AT)11	Cmo_Chr01	7881874..7882901	ATTTCTTTGTCGGCCCTTTT	59.95	CCTTGAAGTTATCTTGACTGGGA	59.64	ATTTCTTTGTCGGCCCTTTTTTATATTTGGTTATGCATCCCTTTGTTGAGTTTTCAGGGGAATTCCTTTTTATTTTGGGGCTTTGTAGGATTTTGTGGGGTCTTATACTTTAACTTGAAATTTTAGATCATGTTTGGTTCTTGAGAATTGGCGTAAGAATTGGACAAATGGGAGAAAACTGAATATATATATATATATATATATGAAAAGAAAAAATAATAATAATAATATCTATATAAGTTGTTTTATATTTTTTTCCCAGTCAAGATAACTTCAAGG
CmoSSR00882	p7	(AAAAATT)3	Cmo_Chr01	7889916..7890942	ACTTCCACTGGTTTCATGCC	59.97	TTTGCTGATGCAAGATGGAG	59.95	ACTTCCACTGGTTTCATGCCCAACGGGAGATGGCCATCCAAAGCAGAAGAATGATGAACATCTGACTGACAACAATAAAAAATTAAAAATTAAAAATTAAGCGATGCTCAAATTAACTAATTTGCTCATATCAGCATACGATAAAATCATCTTCAAAAGGTTTCACGTACAGATTGATCCAGATCTTGATGAATCTGCCTCCATCTTGCATCAGCAAA
CmoSSR00883	p6	(GCCTGT)5	Cmo_Chr01	7920337..7921372	ATGGGGTCTACCAAGGAACC	60.05	GTGACTCCATCCAAGCCCTA	60.07	ATGGGGTCTACCAAGGAACCAGTGAATGGTCAAGGGTCGTATCTCTTGAAATCCCTTATCCAGTTTGAACATCTAACAAGTTGTGGAGGGTTTACTGGGGCATTGGCCTGAGTAGTGGCCTGTGCCTGTGCCTGTGCCTGTGCCTGTACCTGTACCTGTGCCAGTGCCAACGCCTGTGCCTGGGCCTGTGCTTGGGCTTGTTCCTGGGCCTGTTGTAGACTGGCTTGCTGATTGGTTACCAAGGTTTGAATTAGGGCTTGGATGGAGTCAC
CmoSSR00884	p4	(AAAT)5	Cmo_Chr01	7921315..7922340	ACCCGGGAAAGAAAGAAAAA	59.92	TTCTCCCTTTGCAGGTGTTT	59.71	ACCCGGGAAAGAAAGAAAAAAATATATATACATATAATAAAAATAAATAAATAAATAAATCAAATAAAGTAAAAAAAAAAAAACTCAGTCGCCGGAAAACCCGCGAGTTTTCCGGCGACCGCCGAGTTTCGCGGAACCCACGCGAAACCACGGCCACAGCACGCCCACCCTCAACCCACGACACTCTGCAAAGTTTCAAAACACCTGCAAAGGGAGAA
CmoSSR00885	p2	(TC)9	Cmo_Chr01	7927001..7928024	GACGACGACGCTTACGAAAT	60.28	CACCTGCAAAGGGAGAAAAG	59.85	GACGACGACGCTTACGAAATAACACAAATAGCACCCTGAGTTATTGTGCTTTCGTTAGGGATCTCTCTTATGGTAGTAACAGGTCGTTTGGTGTCGGTTTAAGGGTGGTTTGAGGGCTGGTCGGAGAAACTGGACACTCGCCGGCGTTTGTCCAAAATCTCTCTCTCTCTCTCTCAAAATTTTCTCTCTTTTCTCCCTTTGCAGGTG
CmoSSR00886	p7	(AAAAAGA)4	Cmo_Chr01	7944414..7945447	CAATTGAAGCGAGAGAGAGGA	59.7	CGTCCTCAAATCAAATCGTG	59.12	CAATTGAAGCGAGAGAGAGGAAAAAAAAAAAGAATTTTAAGTAGAAGAATGTAAAAATTAGTGGAAAGAAGAATTAAAGAAGAGATGAAATTGAAAAAGAAAAAAGAAAAAAGAAAAAAGAAAGAAAGTAAATGGTTAGGTTAGAGTTGTAGAGGTGAGAAGTGCAATGTTTTCACAAAAGAAAAAAAATCATCTTTGTATTTAAGTACGAGGAAGGGTGTTTGACCTCTAATGATAACAACTTGTCTTTGCCTAGTGTGTTTCAATCTCTTTTACACGATTTGATTTGAGGACG
CmoSSR00887	p8	(TTTATTAT)3	Cmo_Chr01	7953936..7954965	GAAGGAAGGAAGAGGGATCG	60.15	ACCCAAGCATGTCTTCAACA	59.14	GAAGGAAGGAAGAGGGATCGGTTACTAAATGTTTTTCTCCTTCTAAATTTTATTTATTTATTTATTATTTTATTATTTTATTATTTTAACTCTTTTTTTAATTATTTTTATTTGTTTATTTGTTTATTTATTTTTGGGCTATTACAGGTCGTATAAGTAAATTGTGATAAAATGAGATGTTATGTTATATGTGATAAATTGATATGTTTATGATATGATATGTTGAAGACATGCTTGGGT
CmoSSR00888	p2	(GA)10	Cmo_Chr01	7959723..7960748	ACCCGGGAAAGAAAGAAAAA	59.92	GCTCATCGGAGAAACTGGAC	59.81	ACCCGGGAAAGAAAGAAAAATATATATATATACATATAATAATAAAAAAAAAATAATATAATAATTAAATTAAATTAAAAACTCAGTTGCCGGAAAACCCGCGAGTTTTCCGGCGGCCGCCGAGTTTCGCGGAACCCACGCGAAACAACGGCCATAGCACGCCCAGCCCTCAGCCCACGACACCCAGCATCTTCAGAACATCTGCAAAGGGAGAAAAGAGAGAAAAATTTCGAGAGAGAGAGAGAGAGAGATTTCGGACAAACGTCGGCGAGCGTCCAGTTTCTCCGATGAGC
CmoSSR00889	p5	(TTTCG)4	Cmo_Chr01	7970595..7971620	GCAATGAAATGATGGGACCT	59.76	GTGTGCGAACTAGCTGGTGA	60.06	GCAATGAAATGATGGGACCTATCTTTCATTTCGTTTCGTTTCATTTCATTTCGTTTCGTTTCGTTTCGTTTTTCCTACGGTGTAATCCTAACAGGTAATCGTGGACGTGTACCATATACTCTACACGCAGCCCATACGTGCGAATATGGGCTCACCAGCTAGTTCGCACAC
CmoSSR00890	p4	(AAAT)5	Cmo_Chr01	7977128..7978153	GGGTGCAGAACAAACTCCAT	59.97	TGGGTTTTCTGAAAGTTGCC	60.09	GGGTGCAGAACAAACTCCATACTCAGACTTAGTAACAGAACTTGCAGTTGAATGAAATAGTGAACGTTTAAGCTTACGTGAACAAATGATCTTATAGAACATTTAAAATAAATAAATAAATAAATGAAATACAATCTGGGCACAAAATGAAACAAAATCTTACTTGAAACTGATACCTCATCCAAGCTCCAACAGGGCAACTTTCAGAAAACCCA
CmoSSR00891	p3	(AAG)9	Cmo_Chr01	7978524..7979556	TCAATTGCCCCAAGTTTCTC	60.05	TCAGAAACCGTCGATGTTCA	60.24	TCAATTGCCCCAAGTTTCTCTAACCACAACTGTGCCCTTCGACGAGGCCAAAACCCAATAGCCCCAGCAAAAGTACTTGCTGTTAACTTATGCTTTCGAAATTCTTTCCAATTTTTGAACCAATGCTGAAAACTAGAGGACTGAAGAACAGAATAATAATTTCCGGTTTCGAATTTGAAAGAAGAAGAAGAAGAAGAAGAAGAAGCAGAATTGAAATTGCATCTAGACCAGTTCCTAATAGTTTGAGTACGTGCAAATATGTTTTTGCAATTGAACATCGACGGTTTCTGA
CmoSSR00892	p3	(GAA)7	Cmo_Chr01	7978749..7979775	TGAACATCGACGGTTTCTGA	60.24	TACCATTTGGCTCAACACGA	60.11	TGAACATCGACGGTTTCTGAAATCAAACCAACCAAAAGAAACTATGAAAGCCTCAATTCAGATGGAGGTAAAGGCTGAATAACACAATTAAGCAGAAGAGTTGAAAGCATAAATGAGAAGCCTAACCGGAATGAAGAAGAAGAAGAAGAAGAAGATTGTTGCGGAAGGAGGGCGGTCGTGGCGGGAGAAAATCTGTTGCTCCGGCTTTGCTGTGTTTCAATTTGTAGAATAAAACCCTACTCATCGTGTTGAGCCAAATGGTA
CmoSSR00893	p7	(TAAATTT)3	Cmo_Chr01	7979059..7980085	TCGTGTTGAGCCAAATGGTA	60.11	CACGGCATTGAGACATGATT	59.53	TCGTGTTGAGCCAAATGGTAATTAGGTGCCAACACGCGTTCTTTTTTCTACAAAATTCAGCATTCAAATAATATTTATTAAAATATGTTATTTGAATTCTCCATCTTTCCATATTTTTTAATATAAAAAAGAATTTAAATTTAGTTCAATTCTAAAATTAAATTATCAATTAATTTAATTTTTTTTAAAATATTTCACATAAATTTTAAATTTTAAATTTTAAAATAAGGAACGATGGTGAATCATGTCTCAATGCCGTG
CmoSSR00894	p2	(AT)10	Cmo_Chr01	7980762..7981787	GAAGCCCTCGATTAGCTGTG	59.98	CTTCCCCTGAAAATCATGGA	59.86	GAAGCCCTCGATTAGCTGTGCCACAAAACCATCATTTTTAGGATTTAAAAACCTCGATTCATATATATATATATATATATGAACCCTATGAATTAGTAGAGCTGAACAGACTATTGTCGATGAATCATCGCCTTCTAAAATACTAGGACAGAGATGCAGCAAGGACACGTTTACTAAAATATACATTTTAAAAAAATATACCAATATGAAAGAATACAGTATCCTTCATTGACTAGAAAATTAGAAATTTGTTCTATCCATGATTTTCAGGGGAAG
CmoSSR00895	p4	(TTTA)5	Cmo_Chr01	7987122..7988147	CCTTTCCATTTTCACCCTCA	59.9	TCACAAATCCGTTGCTTTTT	58.27	CCTTTCCATTTTCACCCTCATAAATTAATTTTATTACCAAGGTTGAAAATAAATTTATATTTTGATTTTAGTTCAACCTACCAAATGGTTTTAATATTTAAAATTTAACGTTCTATCTTTTTAACTGTTCTTATATATTTTACTCTTAAATATAGCATATTTTATTTATTTATTTATTTATTAAATCTCTTCCTTTTCTTATTAAAAAAAAAATCACATTCATAGAATACAACAATTAGTTTTGTTTTAAATATAACAATACTTTTTTTAAGAAAAAAAGCAACGGATTTGTGA
CmoSSR00896	p2	(AG)15	Cmo_Chr01	7988084..7989119	CACACCTTGCTCAACCTTCA	59.87	AGGATCCTTCTCGGAGTGGT	60.07	CACACCTTGCTCAACCTTCAGCCCACGACTCCAAGAATTGATCAAAATACCTGCAAATAGAGAAAAGAACGAAGAGAGAGAGAGAGAGAGAGAGAGAGAGAGATTTCGAATAACGTTGACGATTTTCCTCGGACGAGCCCCAAACCACCCAAAAATCAATGTCAAATGCTTAGTTACCACTCCGAGAAGGATCCT
CmoSSR00897	p5	(TATGT)4	Cmo_Chr01	7991671..7992696	TTCAAAGGACGGAATCGAAC	60.05	CATTTCGTTTTGTGCATCCTT	59.99	TTCAAAGGACGGAATCGAACTTTCATTAAAGATATATTTGTAACAACGACTTAAGCTTGCCAGGTAAGTGACCTTACTGTCGGCATGATTATATTTGATGTTGACACGTGCCCTGTGGTTCGGCACGTATCATATATATTGATATGTGTGAATTGTCTGTGGATCGATATGTTTCCTATATGTTATGTTATGTTATGTTATAATATGTGGATTGTATGATAATAATTATGGTACGATGTGCTCTAGGAGATGTTTGAGATAGGATACGAGAAGGATGCACAAAACGAAATG
CmoSSR00898	p2	(TC)9	Cmo_Chr01	8011610..8012633	TAACACAAAACGCACCCTGA	60.15	TTTCCTGAGTCCGCTGAGTT	59.99	TAACACAAAACGCACCCTGAGTCATTGTGCTTTCGTTAGGGATCCTTCTTATGGTGGTAACAGGTCGTTTGGTGTCGGTTTGAGGGTGGTTTGAGGGCTCGTCGGAGAAACTGGACACTCGCCGACGTTTGTCCGAAATCTCTCTCTCTCTCTCTCAAAATTTTTCTCTCTTCTCCCTTTGCAGGTGTTCTGAAGATGCTGGGTGTCGTGGGCTGTGGGCTGGGCGTGCTGTGGCCGTCGTTTCACGTGGGTTCTGCGAAACTCAGCGGACTCAGGAAA
CmoSSR00899	p4	(TTTC)5	Cmo_Chr01	8020488..8021513	TTTGTGACTACGCCCATCAA	60.11	GTCCGCGTCTCTATGGTGTC	60.69	TTTGTGACTACGCCCATCAATCACGTGTCACTCGCAGCTAGATATTCTCATGGGTTTGAAATAAGGAGACAAAATTCAAGTTAATGTTTGAAGAATATATCATGACTTCCTGTTGTGTTATAATTGCGCACTACCTAGACAATGTGCTATGAATGAATTGTAACCTTTTTTCTTTCTTTCTTTCTTTCTTTTTTTTTTTTTTTTTTTTTTTTTTTTTTTTTTTTTTTTTTTGTAGATAATGACACCATAGAGACGCGGAC
CmoSSR00900	p2	(AT)10	Cmo_Chr01	8038252..8039277	CCGTGATTTGGAGACACAGA	59.68	CCCTTGGCTCGTAAAGTGAG	59.87	CCGTGATTTGGAGACACAGATTCTCCCTTTGTCTCTTTACTCCATTTTCTAGGGGAAAAGATAATATTGAAACTCATGTTTTTTCTTTTTATAATATATATATATATATATATTTATAAATTGTTTCTAAAAAAAAAATGGTTACAAAATAAGAAAAACATTAAATTATTACCATGTTACTACTTAATAGGTACTTTAATATTTAGTTCAATCAATGTATGTGGGTCATATATGTATATGGAATAGTATGTTTTGATTTTCTTTTTCTCACTTTACGAGCCAAGGG
CmoSSR00901	p7	(AAATAAA)3	Cmo_Chr01	8051954..8052980	TCTGGCAACCAACATCCATA	59.92	ATGAGTGCTTTGAACGACCC	60.12	TCTGGCAACCAACATCCATAAATATTTTCACTTCTAAAACAATTTTTGTTAACCCACGTCGGGTACCATCGGCTGCTTTTCGCTCGCGTTCTAAGTCAGTGTAAAAAAGTTGTTTTCTCATTCCAACATCTCAATATTCGGTTAGGAAAAAGTAATGGGACTAGAATTAAATAAAAAATAAAAAATAAAAAAAAGCCTACAACATTGTATGTACAAGTTTAAAATCGTAATTCTAATTTGAAAACCCTAATTGGGTCGTTCAAAGCACTCAT
CmoSSR00902	p2	(AT)10	Cmo_Chr01	8053592..8054617	TGAGAAGACTGTAGAGAGGCCA	59.23	TCTCGGTATGCTTTCTCCGT	59.84	TGAGAAGACTGTAGAGAGGCCAGAATACTGTTAACAAAATCAAAAGAAAAGACAAGAAATATATATATATATATATATAGAGGATAGGAGGCCAAATACTGTAAACAAAATCCAAAATCAAAAGGAAAGAGAGAAGAGTAGAAATGCAGGGAAAAGAAAAATAATAATAAATAAAGAGTAGGAGAAATACATAGAGCAATAAAGAAGTAAAAGAGAAAATACGGAGAAAGCATACCGAGA
CmoSSR00903	p5	(GAAAA)4	Cmo_Chr01	8056428..8057453	TTTGTTCCCCGTTATGAAGC	59.94	CCAAAAAGCAACGTGATTCC	60.48	TTTGTTCCCCGTTATGAAGCAATCAAAGCAGCAAGACTAAAATTTACTTGCATATTTCATACATTTTATAAAATGTGGATGATACACTCGGTTAAATCTGTACTGAACTTGGATCAGAAAAAAGAAAACGATATCCTTTTTTTTTCTCTTCATTTGACGGCCCTGGCAATATAAAAGGAAACATCTCTATAAAAATGAAAAGAAAAGAAAAGAAAACATTACAGGAATAGGATGGATGAAATGATTCAAGGAATCACGTTGCTTTTTGG
CmoSSR00904	p4	(TTTA)5	Cmo_Chr01	8063935..8064960	CTTGAGTGAAATTAGGCCGC	59.85	TCCAAGCTTTGAAGAGGGAA	59.93	CTTGAGTGAAATTAGGCCGCCAATGACTTGTTTGGTTTGTTTTATTTATTTATTTATTTATTTTTTGTTGTTAATACTAAAATGTTTAATTTTCTTCCCATTTCTTGTGAGCATTCAAACAAAAGAATTATGTATTGTGAGTTGAACTCCATTCGCTTCTAAAAGAAACTGGAGCATAATCATCCCTATAAATACCAATGGGCAGCACAGTGTTTGAAATTTCTCTCCCGTAGGTGTCGTGCTGTGAGTAATACGTCAATTCGATCTCTGCTCGACTTCCCTCTTCAAAGCTTGGA
CmoSSR00905	p4	(AAAT)5	Cmo_Chr01	8068368..8069393	TTTCAGCTAAGTCGAGTGCG	59.37	CAAATGATGGGCGTCTTCTT	60.07	TTTCAGCTAAGTCGAGTGCGGCATATCCATTCAAAGGGCCGAGGAATCAAATCCCACAAAAAATAATAATAATAATAATAAGAAATAAATAAATAAATAAATAAAAGAAGGAACCATCAGAGACCAAAATTAATCCCCAGTAGCTAAACGCTGTACGGTCCGCATCATGGTTGCGTCTTCCGAAGAAGACGCCCATCATTTG
CmoSSR00906	p6	(GGGCCT)4	Cmo_Chr01	8068988..8070017	CCGGAAGGGACTCGAGATT	61.51	TCCTATGAGTGAGTTGAAAGGG	58.32	CCGGAAGGGACTCGAGATTCGAAACCACGGGCCTGGGCCTGGGCCTGGGCCTGGCTTAAATCTTTGTATAAATACAATCAAATTAAAGTACTTGTAACCAAAAAGAAAATTGAATGTATTTTTTTGACCTAATTTTTTTTTAATTATATCATTGTTTTGTATATTAGTTACATAGGTTATGTAGGTATATTTTATATTTTCTATCGAGAATAATCCCTAGTCTATAATAATAAGATTGATTAATGTACATTACGTCGACGACTTAAAGATGATAACCCTTTCAACTCACTCATAGGA
CmoSSR00907	p2	(AT)32	Cmo_Chr01	8076854..8077923	GTGATTTTTCAGATAAGTTGCTGAG	58.58	CTTGTAAAGGATGGACATGTTTG	58.55	GTGATTTTTCAGATAAGTTGCTGAGCAAAAGCATTTAATATATATATATATATATATATATATATATATATATATATATATATATATATATATATATATATTTATTTATTTAATATATTAAATATTAATTTAAACATTTCAAATATACATATTTTTTATTTAATATATTTAATATTAATTTGAATCTCTAAATTTAAATTAATTTAGCACCTACAAATTATAAGCATTAATAATATAAAATTAATTTATCAAACATGTCCATCCTTTACAAG
CmoSSR00908	p3	(AAT)7	Cmo_Chr01	8081274..8082300	TGGAAAGCAATTAGCAGCAA	59.58	ATTGGAAGTGTTTTGAGCGG	60.11	TGGAAAGCAATTAGCAGCAAATTGTTAGCTATAAATAATAATAATAATAATAATGATAATAATAATAATAATAAGCTTGTAAGAGACAGTAAGCAAATAGAGGGAGTTTGAGTGTTTTGAAATCCAAAAAACCCCATCCTTAGAATAACAGTCAAGTCATTTCAATTCTTTCATTCCAATTCTAACACTCAAACCAAACAAACCAACAAATCAAACTCTATAAATACGCATAATCTCCACACCTCTTTTCACCAACCAACTTACACACCAAAATGGCCGCTCAAAACACTTCCAAT
CmoSSR00909	p2	(AT)13	Cmo_Chr01	8084614..8085645	TTGTTGGAGGGGAACTTTCA	60.46	GCATGCATAACTGCAAGAGC	59.6	TTGTTGGAGGGGAACTTTCATGTTGTTCTTGGTTTTTGTATGCATATCTTCACTCTGTGAAACTAATAAACCTCTATTCAGAGTTTGATGTTCATCATGATATTTTTGTTACATATATATATATATATATATATATATTTTGAAGTCCTATGATAATAAAGTTTATGAAGGTTGAAGTCCTATGATAATTATCTCTGATTTTTTTTTTTTTTTTTGCTCTTGCAGTTATGCATGC
CmoSSR00910	p2	(AT)9	Cmo_Chr01	8095251..8096274	TCCCTCCATTTCTACTTTTCTTTC	59.2	AGATGACCGTAGAGAGGCCA	59.83	TCCCTCCATTTCTACTTTTCTTTCTTTCCTTTTGATTTTGTTTACAGTATTTGGCCTCATATATATATACATATATATATATATATATTGTCTTTTCTTTTGATTTTGTTAAGTACTTTGGCCTCTCTACGGTCATCT
CmoSSR00911	p4	(AATA)5	Cmo_Chr01	8115541..8116566	CTCCAATTCATTTCCATACCA	57.41	TGTTGGTCTTTTTGTCTTGTCG	60.18	CTCCAATTCATTTCCATACCATAATTTATTGCCTCAATAAATTAATTAAAAGTAATATTAATACCTTTATATATATATATTTTTTTTTATTAAAAAAATTGGAGCTTTGGATACTTTTTAAACAAGTTACCGTAATTAATTTAGCCAAAAAGAATAAATAAATAAATAAATAAACAGAAAAATCTGATATGTTTTTTTTGATTAAAAATCGACTATTTTGTCGAATAAATATGGATATAATTATCTAACGACAAGACAAAAAGACCAACA
CmoSSR00912	p6	(ACACAA)4	Cmo_Chr01	8117331..8118360	GGATCCTCAATCGGACTTCA	60.01	ATGTCATCCACTGTCGGTCA	59.96	GGATCCTCAATCGGACTTCATTGGCCTGCGGTGGTGCCACTTCCACTTCCTCGATCACCAGTGGCTTTCCGGCCTCCCATGCAACAGCAGCTACACAAACACAAACACAAACACAAACATCAAAGGCTCATCCAAACAACAAAAGAAACAGGATTAGTTGATTGATTGATTGATAGCGTACCCTTGCATTTGATGACTTGACCGACAGTGGATGACAT
CmoSSR00913	p2	(TC)9	Cmo_Chr01	8140579..8141602	CGAAATGACACAAAACGCAC	60.16	CCCAGCATCTTCAGAACACC	60.66	CGAAATGACACAAAACGCACCTTGAGATATTGTGCTTTCGTTAGGGATCACTCTTATGGTGGTAACAGGTCGTTTGGTGTCGGTTTGAGGGTGGTTTGAGGGTTCGTCGGAGAAACTGGACACTCGGCGACGTTTGTCCGAAATCTCTCTCTCTCTCTCTCGAAATTTTCTCTCTTTTCCCCCTTTGCAGGTGTTCTGAAGATGCTGGG
CmoSSR00914	p5	(TTTCG)7	Cmo_Chr01	8153432..8154472	GTCGTCAGCCGTACAGGAAT	60.14	GTGTGCGAACTAGCTGGTGA	60.06	GTCGTCAGCCGTACAGGAATGTCTTGCCTTAACCTGAAAAATGTAGTAGCACATGACTTGAGTATTTCAAGAAATACTCAGTAAGTGACCCCACTATTGGGGTTAAATGCAACAATCACATGCAATAAAATGATGGGACCTATCTTTCGTTTCGTTTCGTTTCGTTTCGTTTCGTTTCGTTTTCCCTACGGTGTAATCCTAACGGGTAATCGTGGACGTGTACCATATACTCTACACGCAGCCCATACGTGCAAGTATGGGCTCACCAGCTAGTTCGCACAC
CmoSSR00915	p4	(ATTT)5	Cmo_Chr01	8155401..8156426	AGTGGAGGTGGGGAAAGATT	59.79	GCCTGTTGCCAAGCTGTATT	60.28	AGTGGAGGTGGGGAAAGATTTTTTTTTTATTTTTTTTATTTTAATTTAATTAATTTATTTATTTATTTATTTATTATTATTATTATTATTTTAACTTTTTATTTGTTTATTTCTTTATTTATTTTTGGGCTATTACACAAAGAATCCAAAAGTCAAATACAAAGTATGTCAATACAATTATAATAAAAGACGAAATTAAAGGGCTAGAGACGTATGAAGAAACGTCACAAAATACAGCTTGGCAACAGGC
CmoSSR00916	p2	(AT)11	Cmo_Chr01	8198281..8199308	GGAAGATTTGGGGAGCAAA	60	CCGAGCCGATAGTAAGACCA	60.23	GGAAGATTTGGGGAGCAAAATTAAAAGTAAATACAAAAACAATTTGACAGAGAAAATACATAGAGTAAAAAGGATGATAAGAAATATATATATATATATATATATTTAATGCTCATGAAGTTTTCAATGCTCACATGAAGTTTAATGGATGGACCATTGTAAAATTTAAAGAATTGAAATTGAAATTGATGTCATGGTTCATGTAGGTTGGCTTGAATACAAAGAACAAAACTGAACTTAATAAATTGGTGATACTAGTCTAAGCTAATCAGGTAAGTGGTCTTACTATCGGCTCGG
CmoSSR00917	p8	(ATGTGATG)3	Cmo_Chr01	8198566..8199595	TGGTCTTACTATCGGCTCGG	60.23	CATACAACATCACCGCATCA	58.94	TGGTCTTACTATCGGCTCGGTCGAAAGACTTTTCTTATGTATGACAATACGTGCCTAGTGGCTCTTGCACGTGTTATTTATGCTTTATTTTATGTGATGATGTGATGATGTGATGACGTTAGATGATGATGTGTTGATGTTGTATGATGTTTGATGTTGTTAGATAGTGATGCGGTGATGTTGTATG
CmoSSR00918	p2	(AT)13	Cmo_Chr01	8207263..8208294	CATACTTTGGACGCGATGTG	60.13	CATATTTTGTAGCGCAGCGA	60	CATACTTTGGACGCGATGTGAATGGTTTACCTTTTGATTATAATTATCGATATATATATATATATATATATATATTATAGCTTCCACATATATGAACATGTAATCTATGATATATGAACATGTAATCTATGATAGATTATTGGACTTGTATGTTTCCTAATATGTTAGGTTGATTATTACTTAATCAGCATGTTGAGCATGTTGTATGCCTTAATTCTTTATTATACATTGATTTAGGGTTTGGATAGCCCTCTATTGCCCAATTGTGAGTTGGACTAATCGCTGCGCTACAAAATATG
CmoSSR00919	p5	(CTTGA)4	Cmo_Chr01	8222208..8223233	GGTGAGCTGCCCTTCAAATA	60.21	TGCCCACCCAAATAGCTTAG	60.09	GGTGAGCTGCCCTTCAAATATATTGTGAAGGATCTGAGAACAGATTCCTGCTTGGGGAATAGATTCTAGCATGGCTCGGCTTGACTTGACTTGACTTGACTCGAATTATATGGTTTGCAATGGAAGTTTTTAGTGAGCCCAGAGGCTTCTGAGAGGCGACGAGGGAGAATTTCTAAGCTATTTGGGTGGGCA
CmoSSR00920	p7	(TTTCTTT)3	Cmo_Chr01	8234764..8235790	GCTAGGCGATGAATAGCTGC	60.11	ATTAGCCACACCATCAAGCC	59.96	GCTAGGCGATGAATAGCTGCATAGGCTATTTCTTTTTTCTTTTTTCTTTTTTAATGCTTTCTTCCTGCTCAACATATTTTGATGATCTTTTAACAATTAGTTATGGACTGTGCATGATGGCAAATGAGCTGTAGACAGAGCATAATTGCCTTCAAATTTGGAGAGACTATTTCTACTTTAAAATGTTGAATATTTGTCAATTTGGTAGAAATCATTTCCATTGTCCGAGGAAGAGTACCTATTGCGGCTTGATGGTGTGGCTAAT
CmoSSR00921	p3	(AAT)7	Cmo_Chr01	8249014..8250040	CATTGCAAATTGGGAAGGTC	60.31	CCTGTTTGAGCCCTCATTGT	60.11	CATTGCAAATTGGGAAGGTCTTTTGTAAACATCATGGATTATACATCCCTCTTGTAAATTTCACTCATCAATGAAATTGTCTCTTATAAAAAAAAAAAAATAATAATAATAATAATAATAAAATAAAAATAATAAAAAATAAAGTCTTAGGGAAAGAGTACGAGCTATCATGAGACAATGAGGGCTCAAACAGG
CmoSSR00922	p6	(CTCATC)4	Cmo_Chr01	8257805..8258834	AGCTCCTCATCAGCAAAGGA	60.1	ATGCACGTGGAGGAAAAATC	59.94	AGCTCCTCATCAGCAAAGGAACTTTTTAAGGAAAGATCAACAACAGCATCATCCCAACTCTTTGCATCCCACTCATCCTCATCCTCATCCTCATCCTCGTCCTCTTTTTTAATTTCATTATCTTCAGAAACCTCAATAATATCCGATTTTTCCTCCACGTGCAT
CmoSSR00923	p2	(AC)9	Cmo_Chr01	8260027..8261050	CCGTGCAGTAGGCTTCTTTC	60.02	TCTGGGTACGCCTCATCTCT	59.83	CCGTGCAGTAGGCTTCTTTCGACCCATAGAAATATCGCCAAATTGAAACGTTAAACCACCAACCCTAGCGCCTCAAAAGTCCTATCTGCCATAAATTAGGCCCATCAACACCAATCAGCAACGTAATCAGATCTCTCTTCAACAGAATAAAATCCATCAAAACAATAGAATATAGAACATATATAAAAACCAATAACATCATTGAAAAAAAAAAAACACACACACACACACACATACAATGAACCTTAACAGAGATGAGGCGTACCCAGA
CmoSSR00924	p2	(TA)12	Cmo_Chr01	8281875..8282904	TGAAAACGATTTCTGCTCATTG	60.24	TCACTACGCTCTCCTCTGTTTTT	59.59	TGAAAACGATTTCTGCTCATTGAAAAGAAAATTAGCTTAGTTAATTGCAAAATCATTTTTAGGAAAGAACAAAAATAGGTTGAAAATGGCAAAAAAAAACTACGGTAAACAACCTTTTTAAAAAAATGATTCATTAATTATATATATATATATATATATATAGGGGAAAGAAAAGAAAAATGATATATATGAGAAAGAAAAAAAAATCGAAATCAATTGAAAATAGCTAAAATTACTAAAATTACTGTAAACAGAATTAAAAAAACAGAGGAGAGCGTAGTGA
CmoSSR00925	p2	(AT)12	Cmo_Chr01	8286792..8287821	CTCCGTTTCCGTTTCTGTGT	60.15	CGGGTACTTGGATTGCTCAT	59.96	CTCCGTTTCCGTTTCTGTGTACATATACATACATACATATATATATATATATATATATATAGATATAGCTTTATCGCAACCCTCGAAATCAGCACCCCTTTTTCAAAAATCTCATCCTTATTTCATCATCATCTTCTTCTTTTTCTTCTGATTCTTCAAGAGAAGAGGGGTTTTCAGCGCCATGGATCACGCGGCGGATGCTCAGAGAACGGACTTGATGACCATCACTCGATTTGTGTTGAATGAGCAATCCAAGTACCCG
CmoSSR00926	p6	(TTGATT)4	Cmo_Chr01	8287531..8288560	TTCCAAATGCTGGGTTGATT	60.31	GCCACTAAAAACAAGGGAAGG	59.99	TTCCAAATGCTGGGTTGATTCAAACTCATTATTCAAGAGACACTGATCACTTTTTCTAGCACTATATATATTATACTGAGCGATAGAACAATTGATTTTGATTTTGATTTTGATTGTTGTTATCATGTTAATCTCTAAGCTGTGATGACTTCTTTTTCGTTTTTTTTATTTGTTCTTACCTCCTTCCCTTGTTTTTAGTGGC
CmoSSR00927	p7	(TTAATTT)3	Cmo_Chr01	8290642..8291668	CCTGGTTTGTCTTGATCCGT	59.97	GGTAACCATTCTTTATTTGATGCTG	60.14	CCTGGTTTGTCTTGATCCGTTGAAATCATGTGAAATGACATCTGGAGAAGATGATATCACTCCTTTCAATTTCTTATTTAAAAAATGAGTAAGTTATATTAAAATTAATTTTTAATTTTTAATTTAAAAAAAAAAAAAAAAAGGAAGAAAAGAATAATTGTGATGGTTGTTTAAAAGAAAGAAACAGCATCAAATAAAGAATGGTTACC
CmoSSR00928	p7	(TTTAATA)3	Cmo_Chr01	8292729..8293755	AAAATTGCGATTGGGCATTA	60.28	GTCAGCTTTGCCTTTTGGAG	59.99	AAAATTGCGATTGGGCATTAATTATGGTAGCCTACATTCTAACTAAATTGGTCGCTATTTAAATTTGTTTTAATATTTAATATTTAATATTGTTACCGACCAATTTTAAGGACGCTTATTTGTTTACCTTGTTAAATATTTTGATTATGATTAAAAATAATTATTAATAATTGGAAGAAAAAGGTGAAGGGTAATTTAGTAATTTGGGTAGCCAAACATACCCAATGGCATCCAAAACGCACCTCCAAAAGGCAAAGCTGAC
CmoSSR00929	p2	(AT)15	Cmo_Chr01	8293228..8294263	ACAGGCATATCCCACCAAAG	59.81	TATCACCACGACCCAGATGA	59.92	ACAGGCATATCCCACCAAAGGATAAATAATTAATTAAAATATATATATATATATATATATATATATATAAAGAAAAAGAAAATGACCATATGTATAAAACTCCTTCACATTTATATATCTAATAACTAACCTAATAAAAGCTTGGAGAGAAAAATAAAAGAAAAAAAAATATATCTCTTTTTTGATCTTCACCTCTTTTGTGGCTTTTGTGTGCTTCTACTATTTTTGTGTTCATCTGGGTCGTGGTGATA
CmoSSR00930	p2	(TA)11	Cmo_Chr01	8332793..8333820	TGCCCATTCCCTCTATGTTT	59.39	GTGTGGCATTCAAGATGTGG	59.97	TGCCCATTCCCTCTATGTTTTCTCTCTTAAATGATTATATATATATATATATATATATTTTGTTAAAAGAGACAAATGCAACATATAAATCGAAAGAGAGAGAAAGGAGATTTTAATTTTTTTTTTTTTAAATCTCTCTATGTATAAATAAATAAATAAATATATATATATATCTAATATTAATGTTATAATTGAGAAACACTGTAGTAGTTGTAACAGAATATTTATTGCTATCCACAAAAAGAAAAAGAAAAGAAATAAAGAAAAACAATTAGAGGTCCACATCTTGAATGCCACAC
CmoSSR00931	p4	(TTAT)5	Cmo_Chr01	8337618..8338643	GAACAGCTTGCGCATACAGA	60.17	CCCTCCATTTCAAGGCAGTA	60.07	GAACAGCTTGCGCATACAGACAATAATGATAATAAGTTGGTTTTTGTCTGTCCAGCTAAATTTAGCTAAAAGCCGACCCATATAACCTCACTTTTTTTTTTTTTGCTTACAATTTTTTTTTAATTATAAATAAATGTTCATTATTTTCTTTTTTAAAAAAAATTACAATTAATGAGAATGAATTCTTGGAGGAAAAAAAAAAAATAGATCTAGATCTTATTTATTTATTTATTTATTATTATTATTTTACTGCCTTGAAATGGAGGG
CmoSSR00932	p3	(TTA)7	Cmo_Chr01	8346962..8347988	CTCCCCTAATCACCCACTCA	59.92	TCTCGCATGTCTGCAACTTT	59.6	CTCCCCTAATCACCCACTCATCCCTCTCACGCCTCCAGCTACGCGTCCACCGCCCCTCTTCCTCCTTTACAGCAGCTGCTTGACGCAGCTGCTTCGTTTCCGTCGATTTTTTTTTTTTTTTTAATTAATTAATTAATTTATTATTATTATTATTATTAAACACACAACACATACACACAAAATACATTTTATCATTATTTTGGGTTATTACAAACGTGCAGACATTCTCACCAATACCGTAGCAAGGATTAAAGTTGCAGACATGCGAGA
CmoSSR00933	p3	(TAT)9	Cmo_Chr01	8373265..8374297	ATTGCCATTTGCTTTCAAGG	60.07	CCCCCATATCTTTTCCACCT	60.01	ATTGCCATTTGCTTTCAAGGAAAGAAAAGTATTTTCTTTTTCTAATCTTTTATTATTGTTATTATTATTAATAATATAATAATAGTTTGAGATATTGTATTTTAATTCTGAATTTTTATTTAAAAAAAAGATAATAATAATAACTACAAAGTATTTGGTCCTTATAATTAGGACATAATTTTATTTTGAAAGTATTATTATTATTATTATTATTATTATAATATATGGGAAGGGATAGATGCCTTATGTAAGAGAGGTGGAAAAGATATGGGGG
CmoSSR00934	p2	(TA)10	Cmo_Chr01	8374120..8375145	TCTTTCCTTGTTTTGTGGGG	59.94	GGGGAGTCTTGTTTTCACACC	60.77	TCTTTCCTTGTTTTGTGGGGGCTGAGGGAGGGGTGAAATTTTGTCCACAAATTATTATTTTTAATATATATGTTAGCTATTACTTAAATCATTTTGTTTATATATATATATATATATATCCTGACATGACATCAGAGGTGTGAAAACAAGACTCCCC
CmoSSR00935	p3	(ATT)9	Cmo_Chr01	8374745..8375777	CAAAAGCATGTGCTGTGGAT	59.72	ATGATGTCCACAATTGCAGC	59.53	CAAAAGCATGTGCTGTGGATTTCTTGCATTAATAGTGTTTTTAATGCTGAATTATCACTTTTCACATTATTATTATTATTATTATTATTATTATGCCTTTTTTTATTTTTTATTTATTTAATATCTAAAAGAAGAACACATACACATTGGATTGCTGCAATTGTGGACATCAT
CmoSSR00936	p2	(TC)11	Cmo_Chr01	8375132..8376159	TGTGCCCACACAACAAAAAT	59.86	CTCCATTTCCAAAGCCATGT	59.93	TGTGCCCACACAACAAAAATAAAGACCAAGAATTTGTGTCTCTCTCTCTCTCTCTCTCTCATGTCAACCTCTCTGATGTTGAGAGATGCAAATGGATAAGAGGATAAAGCTTGGGCTGTTTTTTCATTCTTTTAATGATTCATTTGAGCCTCTTTATGGGCTTCTATATTGGGCCGCTATATGGGCCGCTACATGGCTTTGGAAATGGAG
CmoSSR00937	p2	(TA)14	Cmo_Chr01	8378577..8379610	TTGCGACATACACGAGAACC	59.72	GCCCATGACGACTCTCATTT	60.08	TTGCGACATACACGAGAACCACTTGAAACTTCAAGACCTCCAAGAAGCTCAAATAACTACAGAACTTAGGCCTAAACTTGCTAAAACCTAAATGAAAGTCTCTGATAATCTATTGAGTCATGGATGTGATTGGAGTCCGGTGGCTTAATGAATACACTAAATAAATATTATATATATATATATATATATATATATATTTTCTTCATGGGACTCTGCGAGAGTTGTACATTCACAAATGAGAGTCGTCATGGGC
CmoSSR00938	p2	(TA)17	Cmo_Chr01	8390859..8391898	AAGGGAACGATATGACCACG	59.81	TCTTCCGCACATATTGCATC	59.65	AAGGGAACGATATGACCACGAAGTGTTTACGCTATGATATGATTATGATACGATATGTGTATGACGGATATATTTATATATATATATATATATATATATATATATATATGTTGTCATATGGTATGAAATATGTTATGGTATGAGATATGTGATAAATTGAATTGTTTATGATATGATATATTGTGATGCAATATGTGCGGAAGA
CmoSSR00939	p5	(AAACG)4	Cmo_Chr01	8393321..8394346	GTGTGCGAACTAGCTGGTGA	60.06	GTCGTCAGCCGTACAGGAAT	60.14	GTGTGCGAACTAGCTGGTGAGCCCATACTCGCACGTATGGGCTGCATGTAGAGTATATGGTACACCTCCACGATTACCTGTTAGGATTACACCGTAGGGAAAACGAAACGAAACGAAACGAAATGAAACGAAAGATAGGTCCCATCATTTCATTGCATGTGATTGTTGCATTTAACCCCAATAGTGGGGTCACTTACTGAGTATTTCTTTAAATACTCAAGCCTTGTGCTACTACATTTTTCATTTTTCAGGTTAAGGCAAGGCATTCCTGTACGGCTGACGAC
CmoSSR00940	p2	(TA)12	Cmo_Chr01	8407499..8408528	TGGTGTGTTGTGTTATGGTGTG	60.24	TCTTCGGCACATATTGCATC	59.65	TGGTGTGTTGTGTTATGGTGTGTTGTGTTATTGTGTGTATGACGGATATATTTATATATATATATATATATATATAATATGTTGTCATATGATATGAAATATGTTATGGTATGAGATATGTGATAAATTGAATTGTTTATGATATGATATATTGTGATGCAATATGTGCCGAAGA
CmoSSR00941	c*	(TTTA)6(TTA)20*	Cmo_Chr01	8412423..8413509	GGGGAGGAATGGTGAGAGAT	60.28	TGGCATCCTGCAAATCATAA	60.04	GGGGAGGAATGGTGAGAGATTGAAGGAAGTAGGAGGGTTCGGTTACCAAATGTTTTTCTTATTTTAATTTTTATTTATTTATTTATTTATTTATTATTATTATTATTATTATTATTATTATTATTATTATTATTATTATTATTATTATTAGTATTTTATTTTATTTTTCCGGTTGTTACAGTTATGATTTGCAGGATGCCA
CmoSSR00942	p2	(TA)12	Cmo_Chr01	8424849..8425878	GTCAGCTTCTGCCTTTTTGG	59.99	GCGATTGAATGGTTGATGAG	59.08	GTCAGCTTCTGCCTTTTTGGCAAGCTTATCATGTTTGACCTGTGGAATGTGTTAAAGATCACGTATTTGTTTAGATTACTGACAGTTAGTATCTGATTAAATCTCCTAATAGTTAGGAGTTGATTTAGTTTTTGATTTGTATACTAGATTGTTACTAGATTTTCTGCAGAATTTTAGGTAGATTTTCTAAATATCTTTTTGTATTCTCTGTATATATATATATATATATATATAGCATTCTTTCTCTTCGTAATATACTCTTCTCATCAACCATTCAATCGC
CmoSSR00943	p7	(AAAAACG)3	Cmo_Chr01	8440196..8441222	GTGTGCGAACTAGCTGGTGA	60.06	CCACACCATCTACCAATCCC	60.05	GTGTGCGAACTAGCTGGTGAGCCCATATTCACATGTATGGGCTGTGTGTAGATGTAATAACCTAAAATAATGATAATATATATTTTTATTTATTTGTTGTTGTGTTTGTTAATAATAATAATTAAAAAAATAAAAAAAACGAAAAACGAAAAACGAAAACGAAAACGAAACAACTGCGTCAAGCAGCTGCTGTAAAGGGGGATGAGGGGCAATGGACGCGTAGGCTGGAGGCGTGGGAATGATGAAGGGATTGGTAGATGGTGTGG
CmoSSR00944	p4	(TAAT)5	Cmo_Chr01	8450097..8451122	CTTGCTGGCGTAAGGATAGG	59.86	TCAATGTCTCAAGGTGGTTCA	59.12	CTTGCTGGCGTAAGGATAGGTTGAGGAGAGATAATTGTGGGAAGTGATGAGAGGTTAGTGGAGAGAAGTGGGGGAAAGGTTTTTTTTTTTTTTTATAATTAATTAATTAATTAATTTATTATTATAATTTTAACTATTTTTATAATTATTTTTATTCGTTTATTTCTTTATTTATTTTTAGGCTATTACATTTTAAAATATAAACTTTAATGCTGCAAAATAATCCATACTATATGAACCACCTTGAGACATTGA
CmoSSR00945	c*	(AATA)7(AT)9*	Cmo_Chr01	8451517..8452565	ACATTTCACGCTTGTAGGCA	59.35	GCGATATGACCACGAAATGA	59.5	ACATTTCACGCTTGTAGGCATAACAATTTTCATCATATACATATCATATCATAACATATCGCATCACAATATATCATATCATAGACATGTCAATTTATCACATATCTCATATCATATCACAATAAATAAATAAATAAATAAATAAATATATATATATATATATGTATGTATATATATATATTTGTCATTTACATGTAGAATCATAATCATTTCGTGGTCATATCGC
CmoSSR00946	p4	(TTAT)5	Cmo_Chr01	8460160..8461185	TCAGTTTGGCTGACGTGTCT	59.47	GTATCTCCTTGAGGCGGTGA	60.22	TCAGTTTGGCTGACGTGTCTTATGTTTGAGTGGGCTATGTCTGGGGGGAGGCAATAAAGATAAAAAATAAAACCTAGTGGGAGATTTAAATAAAATAATGGAATATGTTTTTTCAGCTGGTGGAATGATATTTCATGTGGGACAAATTAGATTGGTGGATTCAATTTAAAACAATTCTAAATTATTTATTTATTTATTTATTAAATAGACGAAACATAGGTTTCACCGCCTCAAGGAGATAC
CmoSSR00947	p2	(AT)10	Cmo_Chr01	8471527..8472552	TTTCAATGGCATCGACACAT	59.93	TTTAAGTGCACCACCCATGA	59.96	TTTCAATGGCATCGACACATCTTTTCTCTCTGCCTCTCTGATCGAGTTGTGTGCTTGTGGTGTCTACATATATATATATATATATATAAAGGCGTGGAAATTAATTCTGGTTGGCATCATGGGTGGTGCACTTAAA
CmoSSR00948	p3	(AAT)8	Cmo_Chr01	8482493..8483522	TTGCGTTCGTTAAGGTGTTG	59.77	TGGGGAAGGTAGAGAGAGAGG	59.82	TTGCGTTCGTTAAGGTGTTGTGGTAGAACCACCACACCGAAGAAGCCACGTGAGAGCGTGAGGATGAAATAAGAGTTTGAGACGTTCGAGTACAAAAAAATTTTTAGGGTGTATAATGTAACCATTGAAAATTTTTAAATAAATAAATAATAATAATAATAATAATAATTTAAAAATAAATAAATAAATGATCGACCTCTCTCTCTACCTTCCCCA
CmoSSR00949	p2	(AT)10	Cmo_Chr01	8491851..8492876	GGTTTGGCTTGAACTCATGG	60.5	AATCAGAAGTGCATCCCACC	59.93	GGTTTGGCTTGAACTCATGGTCATTAAGATTTCTAGAATCTTATTTTACTGTATTCATTTTGATTTTTGTAATTCTTCTTCTTATTATTATTATTATAATTGTTTTTTAATGTGCATATATATATATATATATATACACATATATGTATAAATTGGTGGGGGTGGGATGCACTTCTGATT
CmoSSR00950	p2	(TC)10	Cmo_Chr01	8492115..8493140	AAGCCTTTGCCATTAACCAA	59.59	TAACCAATTCCAAGATGCCC	59.76	AAGCCTTTGCCATTAACCAACTCACACATAATCTGTCTGTCTGTGTGTCTCTCTCTCTCTCTCTCTCTATCTCTCTCTATCTCTCTATCTATCTGCCTATCTGATAATCCATATATCTGATTTCTTCTTTTTCTTCTTCTTTTTTGTGGGTGGTTAAGGATGTGCAGAGGCTAGTAATGAAAATCAAATACATCTAGAAATGATGAAGTATGATTATGATTTCTGAGGGCATCTTGGAATTGGTTA
CmoSSR00951	p2	(TC)9	Cmo_Chr01	8492682..8493705	CCGATGATGGAAAAACTCGT	59.93	GCTTGCATTTCATTCGCATA	59.81	CCGATGATGGAAAAACTCGTGCTCTGAAGCATTTGCATTGATTTCTAGTACTAGCCTTTGCCCTCAACCATGAACTCTTTCTCTCTCTCTCTCTCTCTTTCTCAAACTCTACAAACACATACATACATACATACATACATATATATATATATACATTATACGCTTTCCATTTCCTTTCTTTTCTTTTATAGTGGCTGTAGATGAGTAGAGGCTAGTATGCGAATGAAATGCAAGC
CmoSSR00952	p4	(ACAT)6	Cmo_Chr01	8492719..8493748	CCGATGATGGAAAAACTCGT	59.93	GCTTGCATTTCATTCGCATA	59.81	CCGATGATGGAAAAACTCGTGCTCTGAAGCATTTGCATTGATTTCTAGTACTAGCCTTTGCCCTCAACCATGAACTCTTTCTCTCTCTCTCTCTCTCTTTCTCAAACTCTACAAACACATACATACATACATACATACATATATATATATATACATTATACGCTTTCCATTTCCTTTCTTTTCTTTTATAGTGGCTGTAGATGAGTAGAGGCTAGTATGCGAATGAAATGCAAGC
CmoSSR00953	p2	(CA)17	Cmo_Chr01	8493335..8494374	CGCTGTCTTTGCTGTGTGTT	60.1	TTGATTCTTGGGTTTCTGCC	60.05	CGCTGTCTTTGCTGTGTGTTTGTTGCCTTTTGAAGTTTATATGAGTTTGATCACTTGCTATGTTGGTTGGTCTCCACACACACACACACACACACACACACACACACAAAAGGGATTTATTTGATTTGAGTGTTATTTTCCTGTTGGCTTGTGTGATCATTACCATGACCATGAGGGAAAGCTCATGGGTGAGCATCTGATTTATCCTTCGCCATGTTCTTATGAACAGGCAGAAACCCAAGAATCAA
CmoSSR00954	p5	(AACCC)4	Cmo_Chr01	8498257..8499282	CCCAAAATTTTCAAACCCAA	59.65	TGACAATTCGACAATCCGAA	60.05	CCCAAAATTTTCAAACCCAACCCTCTTTTCGGTTATCTGGTTGTTAAAAAAAAAAAAATTTCAAAAAAAAGTTTTATTTATTCACAATTTATAATTATTCGGTTATCCATTCGTGTTCAGACAAATGAACCCAACCCAACCCAACCCAAAATGCTAATCCAACCAACCCAACTCTTATATTTCGGGTTGGATTGGTTCGGATTGTCGAATTGTCA
CmoSSR00955	p3	(TTA)11	Cmo_Chr01	8505189..8506227	CTCCAATCGAAGTGGGATCT	59.09	TGCCTGAACAAACAGCTACC	58.93	CTCCAATCGAAGTGGGATCTCACATGCTAACTTGATGTGCTTATTTAAATAAAAGGTTCCTCTTGTGTCTAAAAATTATGTCAACCCACCTTTAACTTCTATGGTTTGTTTTCACTATTTTTGCAAACATATATTTCCTACCCAAATTTCAAAAACAAAAATATATTTTTTAGAAGAACTATATATTTATGGTTATTATTATTATTATTATTATTATTATTATTACTATTTCAGTTTGGCTAGATTTTGAAAACACTTCTTCATAGAATTAAATTGAAAGGTAGCTGTTTGTTCAGGCA
CmoSSR00956	p2	(GA)18	Cmo_Chr01	8508333..8509374	CGAGGGAAGTCCGAATCATA	60.03	AATGACAAAAATGCCCTTGC	59.94	CGAGGGAAGTCCGAATCATAGTGAGGGAATGGGGAAAGAAGGGGAATAAAATTGAGAGAGAGAGAGAGAGAGAGAGAGAGAGAGAGAGAAGAGGAAGAGGTGAAAATGATGTGTGAAAGAGAGGATGTGTGCATAAATAGAGGTGTGGGTTTGAGATTGTTTGGAAGGTGGTGGCGTGGTGGGGACTGCCTCTTCCACCCCCCAATGCCCTTCCCATTGCTACCCATGGTGTGCCAACTTCTGGAGAGAAATCAGAAGCAAGGGCATTTTTGTCATT
CmoSSR00957	p2	(CT)14	Cmo_Chr01	8534327..8535360	TCCACGAATCTTCACCATGA	60.05	GAGGAAGGAGGGGCTTAATG	60.03	TCCACGAATCTTCACCATGATATTAGATTCTTGAAGGAATGACAACAAAAAATCCAAAATTCATGAGAAGTACTTTTCAATATAGTGAAGCTCTCTCTCTCTCTCTCTCTCTCTCTCTCCCTCTCCATAAGTTTAGGCCCTTCCCCACCCCACTGACTCATTGCATCTCAAACGATTGCAATCAAGGAAATTTCTGAAATGTAGCAGTTGCAATCTCACCCAGAAACTTCTCTCTCTATTAATGTCCTCACATTAAGCCCCTCCTTCCTC
CmoSSR00958	p7	(AATAATA)5	Cmo_Chr01	8543274..8544314	GCCACCTTTGTTGAATGAAGA	60.1	TTGGTAAAACAAAAATACGGGG	59.98	GCCACCTTTGTTGAATGAAGACAAGCATTTTAAAGTGTATTTTCCTTCCCTTTTCATCACTGTGTAATTTTATATTATTTGTTTATTATTTGTTTATTATTTGTGTGGGTTGAGTCAACTAATTAAAAGGGTAATTAAAAATAATAATAATAAATAATAAATAATAAATAATAAATAATAAATAATGGAATTACAAATCTTCATCCCCGTATTTTTGTTTTACCAA
CmoSSR00959	p5	(ATCAA)4	Cmo_Chr01	8546003..8547028	GCTTGCTTGCCAACTACGAT	60.42	GTGCCGTTGAAACCTAAGGA	60.11	GCTTGCTTGCCAACTACGATTCTACAAAGATATCAAATCAAATCAAATCAAACACACCCGCAACTTATGGTATTGTCGATGAAGATTAGAAAATCAAAAGACTAAAATAAATAATCGATAAAAAGTTACATCCCAAGATTATATAAACCATTAGAAGTCGATATTGATTCATTAAAATCATAGTATAAACCTATAACCTATGATTATATTTGCATATTCAAACTTGAATTTTTTCAAGTTGAACATCCTTAGGTTTCAACGGCAC
CmoSSR00960	p3	(ATT)9	Cmo_Chr01	8559774..8560806	CGACAATGACATTTGGGTTG	59.82	TTCTTTGTTGTAGCTAACTTTCGAG	58.47	CGACAATGACATTTGGGTTGGGACATATAGAATGGTGATTAAATCTTTAAGAAATTCGTAGTTTATCTTTTATGATACATTAAAAATTAAAATAATATTCTTAAATTTTAAATTTATGTCTAATAAATTTCTTATTTATTTAATATTTTTTAAAATAAATAGATCTATGAGAACAAAATTAATTATTATTATTATTATTATTATTATTTTGTCCAATAAGATATAAAATTTGTAAAACTAAGATAATTTTAAAGAAATTATTTCTCGAAAGTTAGCTACAACAAAGAA
CmoSSR00961	p4	(TTCT)5	Cmo_Chr01	8566948..8567973	GATGGCCTTGCTTCTCATTC	59.78	ATCCACTTGATACAACGCCA	59	GATGGCCTTGCTTCTCATTCAGGAGCCATTGACCCCTCAAGATTTAAGGTTAGTTTAAAACATGTTTTTCATGCAGATCTTGTTCTGTAGGTTTCCCTTCTTTCTTTCTTTCTTTCTTCCTTTTTTTATTTGTTCGGTTTTTAAAATAATCTTGGTTCTCCTTCTGTGATTGTTGTGCAGATATTTGATGCTCAGCATGGAAATAGCAATATTGACCTTCTACGTACTGGATCAGTGTCTAGTAGAGTTCAGATGGCATCTCATAAAGAGAATGGCGTTGTATCAAGTGGAT
CmoSSR00962	p4	(TTTC)6	Cmo_Chr01	8575517..8576546	TGATGGTGAATCTGTCCTCG	59.63	GAGTGCTGCACAATCGAAAA	60	TGATGGTGAATCTGTCCTCGTTCACATGTGCATTTTTCTCAACTTTACCCGTTTTTGGAACCTAAAGACAAAGCCACATCAGAAAGAGACTCCTAGATGAGGCACTTCATATACCATGTCCGAATGTGTCATGTCATAGTTAATCAATGTTGCTCTACCCACACAATCACTTTTTTTTTTTTCTTTCTTTCTTTCTTTCTTTCTTTAGAAGAATTTTCGATTGTGCAGCACTC
CmoSSR00963	p3	(ATT)11	Cmo_Chr01	8593703..8594741	ATACCTGCCGTTCAAATGCT	59.6	TCTCTGGAACCTAGGTGGTTTT	59.14	ATACCTGCCGTTCAAATGCTAAAATTATTATTATTATTATTATTATTATTATTATTTTTTTGTTAATTAAAATTACAAATTTAATTTTTTCCTAATAATTTATTTCTAATTTTCAATATTTAATGAGTCTTACAATGTTTTTTTAAAAAATTTGTATTTAAAAATCTTTGAACTATATCATTTTTTTTAAGGCATGAAATACACTTCACATAAAATTTACTTTTATATTTAATAAATCAATTAATTTTAAATTTTTTATAAAACCACCTAGGTTCCAGAGA
CmoSSR00964	p2	(AT)10	Cmo_Chr01	8604305..8605330	ACCCTTATTCATTCCCACCC	59.88	ACACTGTTGCCCATTTCTCC	59.97	ACCCTTATTCATTCCCACCCGCTTTTCGTATGAACGGAATGTGTCCCTAAGCTCTTAGAATATATATATATATATATATAAAATTAAGAAAAGGTGAGAAATATTATAATAATAATAAAGTTAGGGTATTATTAAATATTGGTTGAAGGCTAAAACAAAAGCACTATACTAATATTAAACCAATTCTTTAGTGGTTAGCCAAAGAAAGGAAAGGTGTTTGAACATAAAATAAGGTTGTGTGTAGGAGAAATGGGCAACAGTGT
CmoSSR00965	p2	(AT)11	Cmo_Chr01	8605230..8606257	CAACGTTTAATGATAAGGACCCA	60.11	TCAAAGGTCTATTTGAGGGGA	58.63	CAACGTTTAATGATAAGGACCCAGTAGAAGATCGATTTGAAATTTTTTAAAACTTGAGTTTAGTCGGTTATAAAGCTGTATTTTGGTAAATAATAGGTAGAGAACTATGACCCATACATATATATATATATATATATATTTCGAGTACTTTCTATCTAAACCATATATATCCCCTCAAATAGACCTTTGA
CmoSSR00966	p5	(AATAA)4	Cmo_Chr01	8610811..8611836	TGGAACCCTCTCAAAAATGG	59.9	CATGATTGACGGGAAGTGTG	59.96	TGGAACCCTCTCAAAAATGGAACTTGAAATCCCTCATTTGGCATTAGCAATGCTTTGTGGTGGCTTTATTAGATATGCTCCTAAAACCCTGTCCTCTAGTAATTAGATCACATGGAAACCCACATCAAGGTTGAAAAGAACTTCACTAGCTTCATACCATCGGAACAAAAGAAAACGAATGGGAAAAAAAATAATAAAATAAAATAAAATAAACTCAATCATTAGAGAGCTACTAAACCATCACACTTCCCGTCAATCATG
CmoSSR00967	p4	(TTCT)7	Cmo_Chr01	8612392..8613425	AAGATCCTTGAACTTCGCCC	60.58	TTGTCATACCTCCCTCATTGC	59.95	AAGATCCTTGAACTTCGCCCCTCATTTTAAACTTTCCCTATTCTTTCTTTCTTTCTTTCTTTCTTTCTTTTCCTTTTTTGTAAGAGACAATTTCATTGATGTTTAAAATTTACAAAAGGGATGTGTTATTTATGATGCTTACAAAAAACTTTCCCAATTAGCAATGAGGGAGGTATGACAA
CmoSSR00968	p2	(TA)24	Cmo_Chr01	8623329..8624382	AACATACCATCCCATGCTTTT	58.32	TGACCACGAAGTGTTTACGC	59.76	AACATACCATCCCATGCTTTTAACATAACATTTCATCGTATAGATATCATACCAGAACATATTGCATCACAATATATCATATCATAAACAAGTCAATTTATCATATATCTCGTACCATAACATATTTCATATCATATGATGACATATATCTATATATATATATATATATATATATATATATATATATATATATATATATCTGGCATTCACATGTCGTATTATAATCATATCACAGCGTAAACACTTCGTGGTCA
CmoSSR00969	p2	(AT)12	Cmo_Chr01	8653285..8654314	TGATTAAAGGGGCATTTTCG	59.9	TGACCATGAAGTGTTTACGC	57.18	TGATTAAAGGGGCATTTTCGTAATTATCCATCCTTCCAGGAGTATTTTGGTAATTTGCCACTTTTCAAATATTTTATTATTATGTTTTTTGAAAACTCTGTAATTTTTCTAAATATTTTTCATCCTTGGTCATTTTTCTTTTTAACACATCACAATATATCATATCATAAACAAGTCAATTTATCACATATCTCATCCCATAATGTATTTCATATCATATGACAATATATATATATATATATATATATCATTCACATATCGTATTATAATCATATCATAGCGTAAACACTTCATGGTCA
CmoSSR00970	p3	(ATT)10	Cmo_Chr01	8657473..8658508	GAAAGAAGTGGTTACCCTTTAATGA	59.06	CACAAACCGGGCTCAACTAT	59.99	GAAAGAAGTGGTTACCCTTTAATGAAATTTGATTATTATTATTATTATTATTATTATTATTTTGTTAAATTTAAATTGATCCAAAATCAGATTGATGGTAGAAATGTCTATGGAGCAGGGTGAAGACGAAAAAATTTTTCCCATCTCCGTCCACCAACAATAGTTGAGCCCGGTTTGTG
CmoSSR00971	p2	(AT)10	Cmo_Chr01	8682169..8683194	ATTTTCCTCCCACGGTCTCT	59.93	TAAACCCGGAGAGGTTTGAA	59.54	ATTTTCCTCCCACGGTCTCTCTCTTTTCTTTCCTGTATTTAATTAGTTAAATATATATAATTTCCTTTCCTTTACCTCTTTCTTTTCTATACTTCATTAAATATATATATATATATATATTTTTCTTTACCTCTCTCTGTTTAATTCTTTTCAAACCTCTCCGGGTTTA
CmoSSR00972	p4	(TTTA)5	Cmo_Chr01	8696060..8697085	AAGGGAGGAAAGGTTTGTGG	60.33	GTCATTGCATTCGCATGTTC	60.09	AAGGGAGGAAAGGTTTGTGGAGAGAAGTGGGAAAATGTTGTTTTTATTTATTTATTTATTTAATTATTATTATTATTTTAACCATTTTTTTATAATTATTTTTATTGGTTTATTTCTTTATTTATTTTTAGGCTATTACAGCCTCGCCTTCCCTGAAACAGAGGTATCACATGCGTTGAGTATTTGAAGAAATACTAAGTAAGTGACCCACTATTGGGGTTAAATGCAAGAACATGCGAATGCAATGAC
CmoSSR00973	p6	(TTCTTG)4	Cmo_Chr01	8696752..8697781	AAAACAATGGGTTGAGGACG	59.83	GGGAAGTGTCTTGGAGAACG	59.7	AAAACAATGGGTTGAGGACGACGGGTGAGATTTGTCTATGGCACCTGCTCTAGAGTCCGCTACCGACCTCGACCAGCTCATTATTTCCTGAAAAAAAATGGAGAATAAGGAATGAGTACAAGACTCAGTAAGTAGCCTACTTGTAGGCTCTTAATCGTGTCCTTGATATGCTAGGGTACCACCTTCTTTTTTTTCTTGTTCTTGTTCTTGTTCTTGCCGTATGTTCTTGTTATGTTTTTTAATTCGTTCTCCAAGACACTTCCC
CmoSSR00974	p2	(AT)24	Cmo_Chr01	8700301..8701354	TTGGTAATTTGCCACTTTTCG	59.99	TGACCACGAAGTGTTTACGC	59.76	TTGGTAATTTGCCACTTTTCGAATATTTTATTATTATTTTCTTCGAAAACTCTGTAATGTTTCTAAATATTTTTCATCCCTTGTTGGTCATTTTTCTTTTCTTCAGTACATATTGCATCACAATATATCATATCATAAACAAGTCAATTTATCACATATCTCATACCATAACATATTTCATATCATATGACAACATATATATATATATATATATATATATATATATATATATATATATATATCCGTCATTCACATATCGTATCATAATCATACCATAGCGTAAACACTTCGTGGTCA
CmoSSR00975	p7	(TGAAGGA)3	Cmo_Chr01	8704182..8705208	GCACCCAGATTCCAAAGGTA	59.93	CCCTTTTGACCTCCAAATCA	59.9	GCACCCAGATTCCAAAGGTAAATCTCTATAAAAGGTTGATGGGCTTATTGAGATTCTGTATATTTTCGAAGAGGAATGCTGATGAAGATCCTAAGATTAGGGTTTTTGTGAAGGATGAAGGATGAAGGATGAAGGGAAAATTGGGAAGAAAATGAAAGAGGCTATGTTTGGAAAAGGTGAGGTTGTATGTACAGAGTATGGCGAAGGATGATTTGGAGGTCAAAAGGG
CmoSSR00976	p2	(AT)24	Cmo_Chr01	8708752..8709805	TTGGTAATTTGCCACTTTTCG	59.99	TGACCACGAAGTGTTTACGC	59.76	TTGGTAATTTGCCACTTTTCGAATATTTTATTATTATTTTCTTCGAAAACTCTGTAATGTTTCTAAATATTTTTCATCCCTTGTTGGTCATTTTTCTTTTCTTCAGCACATATTGCATCACAATATATCATATCATAAACAAGTCAATTTATCACATATCTCATACCATAACATATTTCATATCATATGACAACATATATATATATATATATATATATATATATATATATATATATATATATCCGTCATTCACATATCGTATCATAATCATACCATAGCGTAAACACTTCGTGGTCA
CmoSSR00977	p4	(TTTA)5	Cmo_Chr01	8742928..8743953	TGGGAAGGGATGAAAGTTTG	59.9	GTCATTGCATTCGCATGTTC	60.09	TGGGAAGGGATGAAAGTTTGTGGAGAGAAGTAAGAAAATGTAGTTTTTATTTATTTATTTATTTAATTATTATTATTATTTTAACTATTTTTTTTATAACTTTTTTTATTTGTTTATTTATTTATTTATTTTTAGGCTATTACAGCCTTGCCTTCCCTGAAACAGAGGTATCACATGCGTTGAGTATTTGAAGAAATATTCAGTAAGTGACCCCACTATTGGGTTAAATGCAAGAACATGCGAATGCAATGAC
CmoSSR00978	p6	(TTCTTG)4	Cmo_Chr01	8743623..8744652	GCTCTAGAGTCCGCTACCGA	59.74	CCTCAGACACAGGTCGACAA	59.86	GCTCTAGAGTCCGCTACCGACCTCGACCAGCTCATTATTTCCTGAAAAAAAAAATGGAGAATAAGGAATGAGTACAAGACTCAGTAAGTAGCCTACTTGTAGGCTCTTAATCGTGTCCTTGATATGCTAGGGTACCACCTTCTTTCTTTTCTTGTTCTTGTTCTTGTTCTTGCCGTATGTTCTTGTTATGTTTTTTAATTCGTTCTCCAAGACACTTCCCTTAGGATTTACAGTACTAGACATAAACTTGTCGACCTGTGTCTGAGG
CmoSSR00979	p6	(TTCTTG)4	Cmo_Chr01	8767716..8768745	GCTCTAGAGTCCGCTACCGA	59.74	CCTCAAACACAGGTCGACAA	59.72	GCTCTAGAGTCCGCTACCGACCTCGACCAGCTCATTATTTCCTGAAAAAAAAATGGAGAATAAGGAATGAGTACAAGACTCAGTAAGTAGCCTACTTGTAGGCTCTTAATCGTGTCCTTGATATGCTAGGGTACCACCTTCTTTCTTTTCTTGTTCTTGTTCTTGTTCTTGCCGTATGTTCTTGTTATGTTTTTTAATTCATTCTCCAAGACACTTCCCTTAGGATTTACGGTACTAGATATAAACTTGTCGACCTGTGTTTGAGG
CmoSSR00980	p3	(ATT)10	Cmo_Chr01	8775349..8776384	GAAAAAGAAGGTTGTTACCCTTGA	59.92	GGGAAATTTGTTCGTCTCCA	59.91	GAAAAAGAAGGTTGTTACCCTTGATGATTATTATTATTATTATTATTATTATTATTTTGTTAAATTTAAATTGATCCAAAATTAGCTTAATGGTAGAAACCTCCGTGGAGCAAGGTGGAGACGAACAAATTTCCC
CmoSSR00981	p6	(TTCTTG)4	Cmo_Chr01	8787326..8788355	AAAACAATGGGTTGAGGACG	59.83	GGGAAGTGTCTTGGAGAACG	59.7	AAAACAATGGGTTGAGGACGACGGGTGAAATTTGTCTATGGCACCTGCTCCAAAGTCCGCTACCGACCTCGACCAGCTCATTATTTCCTGAAAAAAAAATGGAGAATAAGGAATGAGTACAAGACTCAGTAAGTAGCCTACTTGTAGGCTCTTAATCGTGTCCTTGATATGCTAGGGTACCACCTTCTTTCTTTTCTTGTTCTTGTTCTTGTTCTTGCCGTATGTTCTTGTTATGTTTCTTAATTCGTTCTCCAAGACACTTCCC
CmoSSR00982	p2	(AT)15	Cmo_Chr01	8794971..8796006	TCCCTTTGTATCCAAGCCAA	60.44	AGAGACCGTGGGAGGAAAAT	59.93	TCCCTTTGTATCCAAGCCAACCTATAAGAATCCATAACATCAATTTCATGTTTAATTCTCTAACTCCTACAATGGTTCATGTGCTAAACTGAGCATTAAAGACTTTATGAGTATTGAATATATATATATATATATATATATATATATTGGTATCTTTTTTTTTACTCTATGTATTTACTCAAATTGGTTCTGTTCACCAAATTTTCCATTTTCCTCCCACGGTCTCT
CmoSSR00983	p6	(TTCTTG)4	Cmo_Chr01	8809422..8810451	AAAACAATGGGTTGAGGACG	59.83	GGGAAGTGTCTTGGAGAACG	59.7	AAAACAATGGGTTGAGGACGACGGGTGAGATTTGTCTATGGCACCTGCTCTAGAGTCCGCTACCGACCTCGACCAGCTCATTATTTCGTGAAAAAAAATGGAGAATAAGGAATGAGTACAAGACTCAGTAAGTAGCCTACTTGTAGGCTTTTAATCGTGTCCTTGATATGCTAGGGTACCACCTTCTTTTCTTTTCTTGTTCTTGTTCTTGTTCTTGCCGTATGTTCTTGTTATGTTTTTTAATTCGTTCTCCAAGACACTTCCC
CmoSSR00984	p2	(AT)16	Cmo_Chr01	8812975..8814012	TCTTCGGCACATATTGCATC	59.65	AAGGGAACGATATGACCACG	59.81	TCTTCGGCACATATTGCATCACAATATATCATATCATAAACAAGTCAATTCATCACATATCTCATACCATAACATATTTCATATCATATGACAACATATATATATATATATATATATATATATATATCCGTCATTCACATATCGTATCATAATCATACCATAGCGTAAACACTTCGTGGTCATATCGTTCCCTT
CmoSSR00985	p4	(TTTA)5	Cmo_Chr01	8855162..8856187	TGGAGAGAGGTGGGAAAATG	60.04	AGGGAAGGCAAGGCTGTAAT	60.1	TGGAGAGAGGTGGGAAAATGTAATTTTTATTTATTTATTTATTTAATTATTATTATTATTTTAACTATTTTTTTTATAATTATTTTTATTTGTTTATTTGTTTATTTATTTTTAGGCTATTACAGCCTTGCCTTCCCT
CmoSSR00986	p6	(TTCTTG)4	Cmo_Chr01	8855856..8856885	GCTCTAGAGTCCGCTACCGA	59.74	CCTCAGACACAGGTCGACAA	59.86	GCTCTAGAGTCCGCTACCGACCTCGACCAGCTCATTATTTCCTGAAAAAAAATGGAGAATAAGGAATGAGTACAAGACTCAGTAAGTAGCCTACTTGTAGGCTCTTAATCGTGTCCTTGATATGCTAGGGTACCACCTTCTTTCTTTTCTTGTTCTTGTTCTTGTTCTTGCCGTATGTTCTTGTTATGTTTTTTAATTCGTTCTCCAAGACACTTCCCTTAGGATTTACGGTACTAGACATAAACTTGTCGACCTGTGTCTGAGG
CmoSSR00987	p2	(AT)10	Cmo_Chr01	8859402..8860427	TTGGTAATTTGCCACTTTTCG	59.99	AAGGGAACGATATGACCACG	59.81	TTGGTAATTTGCCACTTTTCGAATATTTTATTATTATTTTCTTCGAAAACTCTATAATTTTTCTAAATATTTCATCCCTTGTTGGTCATTTTTCTTTTCTTCAGCACCATCACAATATATCATATCATAAACAAGTCAATTTATCACATATCTCATACCATAACATATTTCATATCATATGACAACATATATATATATATATATATCCGTCATTCACATATCGTATCATAATCATACCATAGCGTAAACACTTCGTGGTCATATCGTTCCCTT
CmoSSR00988	p4	(TTTA)5	Cmo_Chr01	8879020..8880045	TGGGAAGGGATGAAAGTTTG	59.9	GTCATTGCATTCGCATGTTC	60.09	TGGGAAGGGATGAAAGTTTGTGGAGAGAAGTGGGAAAATGTAGTTTTTATTTATTTATTTATTTAATTATTATTATTATTTTAACTATTTTTTTTATAATTATTTTTATTTCTTTATTTCTTTATTTATTTTTAGGCTATTACAGCCTTGCCTTCCCTGAAACAGAGGTATCACATGCATTGAATATTGGAAGAAGTACTCAGTAAGTGACCCCACTATTGGGGTTAAATGCAAGAACATGCGAATGCAATGAC
CmoSSR00989	p4	(TTTA)5	Cmo_Chr01	8881292..8882317	TGGGAAGGGATGAAAGTTTG	59.9	GTCATTGCATTCGCATGTTC	60.09	TGGGAAGGGATGAAAGTTTGTGGAGAGAAGTGGGAAAATGTAGTTTTTATTTATTTATTTATTTAATTATTATTATTATTTTAACTATTTTTTTTATAATTATTTTTATTTCTTTATTTCTTTATTTATTTTTAGGCTATTACAGCCTTGCCTTCCCTGAAACAGAGGTATCACATGCATTGAATATTGGAAGAAGTACTCAGTAAGTGACCCCACTATTGGGGTTAAATGCAAGAACATGCGAATGCAATGAC
CmoSSR00990	p2	(AT)14	Cmo_Chr01	8885631..8886664	TTGGTAATTTGCCACTTTTCG	59.99	AAGGGAACGATATGACCACG	59.81	TTGGTAATTTGCCACTTTTCGAATATTTTATTATTATTTTCTTCGAAAACTCTGTAATTTTTCTAAATATTTCATCCCTTGTTGGTCATTTTTCTTTTCTTCAGCACTTATTGCATCACAATATATCATATCATAAACAAGTCAATTTATCACATATCTCATACCATAACATATTTCATATCATATGACAACATATATATATATATATATATATATATATAGATATATATATATCCGTCATTCACATATAATCATACCATAGCGTAAACACTTCGTGGTCATATCGTTCCCTT
CmoSSR00991	p4	(TTTA)5	Cmo_Chr01	8907272..8908297	TAATCGTGGGAAGGGATGAA	60.27	GTCATTGCATTCGCATGTTC	60.09	TAATCGTGGGAAGGGATGAAAGATTTGTGGAGAGAAGTGGGAAAATGTAGTTTTTATTTATTTATTTATTTAATTATTATTATTATTTTAACTATTTTTTTATAATTATTTTTATTTGTTTATTTCTTTATTTATTTTAAGGCTAGTACAACCTTGCCTTCCCTGAAACAGAGGTATCACATGCGTTGAGTATTCGAAGAAATACTCAGTAAGTGACCCCACTATTGGGGTTAAATGCAAGAACATGCGAATGCAATGAC
CmoSSR00992	p6	(TTCTTG)5	Cmo_Chr01	8907966..8909001	AAAACAATGGGTTGAGGACG	59.83	GGGAAGTGTCTTGGAGAACG	59.7	AAAACAATGGGTTGAGGACGACGGGTGAGATTTGTCTATGGCACCTACTCTAGAGTCCGCTACCGACCTCGACCAGCTCATTATTTCCTGAAAAAAAAAATGGAGAATAAGGAATGAGTACAAGACTCAGTAAGTAGCCTACTGTAGGCTCTTAATCGTGTCCTTGATATGCTAGGGTACCACCTTCTTTCTTTTCTTGTTCTTGTTCTTGTTCTTGTTCTTGCCGTATGTTCTTGTTATGTTTTTTAATTCGTTCTCCAAGACACTTCCC
CmoSSR00993	p5	(TTATT)4	Cmo_Chr01	8931837..8932862	ACTGAGGAGTCGTGGGTGAG	60.31	GATTTGGGCTTTGTAGGGGT	60.19	ACTGAGGAGTCGTGGGTGAGGCAAGCATCTCGGGGATTCTCGAGGATTTCGGCGACTGCGCAATTATTTTATTTTATTTTATTATTTATTTTTTTAATAAATTTCTGGTCGTTACAATCTAAATTTAACTAATGTGAACTTGGAAAGTATTTAGGGGAACGAAACATAAATATTTTTCATTTATATGAAATTTTAAAATCATTACGATGGAACACTAAAAGACGCTATCTAATTTTCATATTCGAGCCTACAAAACCGAACCTAAACCTCGGCAATACAACCCCTACAAAGCCCAAATC
CmoSSR00994	p4	(AATA)5	Cmo_Chr01	8932842..8933867	GGATCGACATATGGGCTGAC	60.31	TTATTTGTGGAGAGAGGGGG	58.98	GGATCGACATATGGGCTGACAACGAAAAAACGATAAAATTTGCACAAATTTTAAAATCAAACATAAATTGAAATAAAGATAAGACAAACAACATCTCCAAATTTATTACAAATAGAAAAAATGGGTTCGAGATACAATGTAATAGCCCAAAAAAATAATAAATAAAATCATAAATAAGGAAATAAATAAAGTAATAAACAAATAAAAATAATTATAAAAAATAGTTAAAAAATAATAATAAATAAATAAATAAATAAAGCAACCTCTCCCCCCTCTCTCCACAAATAA
CmoSSR00995	p5	(GATTT)4	Cmo_Chr01	8942451..8943476	CCTTGCATTCATGTTGTCGT	59.57	GGACAACGCTTCAGAGGAGA	60.53	CCTTGCATTCATGTTGTCGTTTTGAGTCACGGCTCATAGTAAAATATTGGGTTGTGACATATGTCATAAGTGATAATAGGTGAGACTCAATTCTTATTTTGAGTTATTTTGAGGGGCTCCCATGTGATTCCTTGAAATTTTTTCTCTTGCGATTTGATTTGATTTGATTTTCTAACTCATCTCCTCTGAAGCGTTGTCC
CmoSSR00996	p2	(TA)9	Cmo_Chr01	8943663..8944686	CATTTCCATGCATCTCTCCTT	59.14	TGAAACTGGGGAGAGAACAGA	59.83	CATTTCCATGCATCTCTCCTTACAGTTCGGTTGAATCTCCTATATATATATATATATATGTATATATATATATATATGTATATATATATGTATATATATATATATATGTGTATATATATATATATGTATATATATATAATTTGGATGGAGACAAGAACATGGTCCTGTTTAGCTAAACTTATCTCTCTGTTCTCTCCCCAGTTTCA
CmoSSR00997	p2	(GA)10	Cmo_Chr01	8948175..8949200	TTGAGGACCCTTGCATTCAT	60.46	TTCCAAGAGCTTGTGGATCA	59.37	TTGAGGACCCTTGCATTCATATTGTACTTGATTTCACCATCATAAAGCATCTTTCTTATGTAGTGTTCTATGTCTGAACCAATTAGGCGAAGTGTGTATTCTGTCAGTGGAGCTCCCTGATTTCCTCAATTTTCATTTTTAAAATGATGGTTAGATTAAGAGCATATTAACAAAGAAACATAGTAAAATAAAATGGATCTTTGAATTGTCATCATTCTAGAGAATTGATTAATCATGAATCAGTCAAGCCGAGAGAGAGAGAGAGAGAGATACCTCATAATGATCCACAAGCTCTTGGAA
CmoSSR00998	p3	(AGG)10	Cmo_Chr01	8959476..8960511	TGGAAGGGAAGTGGAAATTG	59.9	AAGACGATAAACATTGGCCG	59.96	TGGAAGGGAAGTGGAAATTGGGATCGTCCGGAAAAAAAAGGTGAGGAAGAGGGGCGGAGGAAGGAGGAGGAGGAGGAGGAGGAGGAGGAGGAGAGATATACCTGGATTGATCCCGTTGGTGGTAAAGAAATGGAGGCAAATCCATGGCGGAGATCAGATCTGGTTGGGCGGCCAATGTTTATCGTCTT
CmoSSR00999	p7	(TTTTTTA)3	Cmo_Chr01	8968114..8969140	CCAACCCTCAGGGCTAAAGT	60.49	TTCCCTATTTTAGCCTTTCCTT	57.61	CCAACCCTCAGGGCTAAAGTATATCCGTAGAAAATCCCTTTTGCATGCCCTTCAGGGAAAAGTCAACAAGCATGGAGATGAATCCTATCATTGATGATCCTCTCAAGCTATGAACTTGTGATTTTAAAAGGATTTGAAATTTTGCTTGCCCTTTTATTTATTTTTTTTATTTTTTATTTTTTATTTTTACCATAAATCAATAAGGAAAGGCTAAAATAGGGAA
CmoSSR01000	p2	(AT)17	Cmo_Chr01	8990992..8992031	CAGGGTTATATTTCATGCCATT	57.91	TGTGACCACGAAGTGTTTACG	59.67	CAGGGTTATATTTCATGCCATTTATCGTAATTTCATATCATTCATATCATGTTGTATACACATAATTTAAGAGACATATCATAACGTTCTATCCTTTTAACATAACATTTCATCATATACATATCATACCAACATATTGCATCACAATATATCATATCATAAACATGTCAATTTATCACATATCTCATACCATAACATATCATATGACAACATATATATATATATATATATATATATATATATATGTCATTCACATGTTGTATCATAATCATATCATATCGTAAACACTTCGTGGTCACA
CmoSSR01001	p3	(AGA)9	Cmo_Chr01	9003470..9004502	CAGAAGCAGGCCTCCAATTA	60.34	TCCTCCACTTCCATTTCAGG	60.04	CAGAAGCAGGCCTCCAATTAAAAAATTACGAACTCAGCAAAAAAACAAAAAAAAAAAAAAGAAAGTCGGAGAAAGAGAGTAGAACCTTTTTTCGCTTGTAGGAGGCCCCGACCGATTGAAGCCTTCGATTCAAAGACATCCACTGAAAAATAAAAAATAAACTCAACTTTAAAGACAAAAACAGAGAAGAAGAAGAAGAAGAAGAAGAAGAAGCAGGAGAGTGAATTATGACAATGTCACGGTAGTTGTGAATGTGAGGTACCTGAAATGGAAGTGGAGGA
CmoSSR01002	p2	(AT)10	Cmo_Chr01	9007242..9008267	TACTCACCTCCAAACCCTGC	60.11	TGGAGTGACAACAAAACCCA	59.98	TACTCACCTCCAAACCCTGCACTCTCTATGGGAAACATTAGCCAGCTTTTTTTATACATTTTGTCAGCCTTGTCTGTAAACACCTCCAAAATTATATATTTCTTTTTTCATATATATATATATATATATTGGAAGAAAGAAAGAACAAAGACAGAGGTGATCCAACCAAACAAAGGGTGAAAGTGTACACGTATATGCATTTATCTGTTTTTGGTTTGCCTCCTCTCTACATCTCTCGTTTCTATTGCCGCCAGCCATTGTCCATTGGGTTTTGTTGTCACTCCA
CmoSSR01003	p8	(AAAAAATA)3	Cmo_Chr01	9014271..9015300	CGAAAGCCTGCTTACATTGG	60.76	CAACCGACCATTTAGGGAAA	59.79	CGAAAGCCTGCTTACATTGGAACTCTCGAGCTTCCATCTCTAACCCTGTTTTTCTTTTTCCCTTTATTTCCAATTAATTGTACGAAAAAATAAAAAAATAAAAAAATAAAATTAATTTATATTTAATGGTTATTAGAAATAAATGTATTTTAAAATTTACAATCAATAACTATTAAAAAAATTAATAATTTTTCCCTAAATGGTCGGTTG
CmoSSR01004	p2	(TA)10	Cmo_Chr01	9016349..9017374	ATCAGGCCAGAGAGAGTGGA	59.94	CAGACTGCAATTGACCTCACA	59.89	ATCAGGCCAGAGAGAGTGGAGAACTATGTGTGTGTGTATATATATATATGTATATCTGTACATATGTGTGTATATATATATATATATATATGGGAAAATTTTTAATATTAGAAATATGAAACTCAAATATAAAAAATAAATGAAAAGTAGGGAGTTGAAATTAAATGATAGGGACAAAATTCTTAATTTGACCTAATTTCTATTTAATTAAATTATTTTCTAATCTTTTAATACAGTGGACAATATGTGAGGTCAATTGCAGTCTG
CmoSSR01005	c	(TTA)15g(TAT)17	Cmo_Chr01	9018248..9019350	CAAACACAATTCCTCACAAACA	58.58	CTGCCCCTATTTCGACATTC	59.53	CAAACACAATTCCTCACAAACATTATTTCACATATCACTCGAAATTAAAATCAAGTCGTATATGATTATCACGTGAAATATTAATTTTTCAATTAAAAAATTTATTATTATTATTATTATTATTATTATTATTATTATTATTATTAGTATTATTATTATTATTATTATTATTATTATTATTATTATTATTATTATTATGTATAATATACATGTTTGTCGGGCTCCAGGAATGGGAATGTCGAAATAGGGGCAG
CmoSSR01006	p2	(TA)13	Cmo_Chr01	9025357..9026388	CTTCCTTGGCCTCTTCCTCT	59.95	TTGTAAGGTTTCTTCCTCCCAA	59.97	CTTCCTTGGCCTCTTCCTCTGCAACCCATTATTTTCTTCTTCTATTCCAATTTTAACATTTTACCAGTAAACTTCCATATTTCCTTCCCTATTTATCCCTTTTTTTAAATAATTTTACAGATATTTTAGAAAAAGGATATTAAGTTTAAATTGTTCTATAATCCTTAGTTGGGTTTTCTTAGTTATTTTATATATATATATATATATATATATATCATAATTATTGAACGAAAATGATAGGATTATTGGAATCTTTTGAACAAAGAAGGTAAGAATAATTGGGAGGAAGAAACCTTACAA
CmoSSR01007	p5	(TTTCT)5	Cmo_Chr01	9033922..9034952	CAATCCCGGGAGAAAGTGTA	59.93	CGCATTCATATGGTTGTCCA	60.34	CAATCCCGGGAGAAAGTGTAGAGTACTGAAAACACTGCATACCTTGAGAGAGAACATTATAATCATGCATAGAAAGTATGATAATGTTTAGGTTGCTTAAGGGAATACTAGGAATCCCAGAACCATTCAAATGTTGTCGTGGATCTTAAAGTAGCATATTTCTTTTCTTTTCTTTTCTTTTCTTTTCCTCTACTTTTTTTTTTTTCACTTAATGAAGACACACTCTTGGACAACCATATGAATGCG
CmoSSR01008	p4	(ATAA)6	Cmo_Chr01	9054037..9055066	CAAACCCATTAAATTCCCCA	59.5	TGCAGGAGAAAAGAGGGAGA	60.07	CAAACCCATTAAATTCCCCATAAAATTTATTTCTTAATAACTTTTAAAAAGTAGATTCTAGAAGAACCAGATACTTAATTTGACTTTGAATATGAATAAATCAAATTTTAATTTGAATTTAAAAACATAAATTTAGCCATAAATAAATAAATAAATAAATAAATATTTGTATTAATAAAAGGAAAATGGATGGTACCTGATGCTGGTGGCTGTGGTAATATGATAGGCGACGCCATTAAACCATAAGTTTATCACTATCAGCACACTGCATATCCTCTCCCTCTTTTCTCCTGCA
CmoSSR01009	p5	(TTATT)4	Cmo_Chr01	9055987..9057012	CTCGGAAGTAGTTATGAAAAATTGG	59.5	ACGCAACGTTTACTTAATCCA	57.41	CTCGGAAGTAGTTATGAAAAATTGGTACGTAGATGAAATGAGTTACCATTTTTTTTATTAAGATTATTATTTTATTTTATTTTATTTTAGGGCTGTTACATTTTAATTTTAAAAATATATAATATAATTGTAATTAATGGTAATTAATTATAAATAAATAATATAAAGAAGTATATTTTAATATGATACCTTAATAATGAATATTAATAAGAAATTTGTAATTATGATAGGTTAATAATGGATTAAGTAAACGTTGCGT
CmoSSR01010	p2	(AT)14	Cmo_Chr01	9085397..9086430	GTTCCAACGAACGCAGATTT	60.12	GCCCACATGGAATAACAAGG	60.19	GTTCCAACGAACGCAGATTTGGATTTGCTTCTAGAAGCCCTCACAAGTCACGTGTTCCACGTCCACACTGACTCCACACCATCCACTATATTTTCCCGGACCTTTATTTAATATATATATATATATATATATATATATAAATTATAATGATATCAATAATAATTTTAAATAAAATAACACCATAAATAAATAAATAATAATTTTAAATTGTTTCTAGAAACATGAAAAAGAAATAATTAAATAATCATAATAAAAATAATAATAAAAACCTTGTTATTCCATGTGGGC
CmoSSR01011	p5	(AAAGA)4	Cmo_Chr01	9087318..9088343	TGTTCTTATCTTCCCCCACG	59.93	TTTTGGTTCCTTGGTGCTTC	60.09	TGTTCTTATCTTCCCCCACGAGAAGGAAAAAAAAAAAAAAAAAAAAAAAAAAAAAAAAAAAAAAGAAAAAAAAAAAAAAAAAAGAAAGAAAAGAAAAGAAAAGAGAAAAGCTTTTCTTAATCTTCAAGTTCTTGGTAAAGTTGAATTCGAGCTCCGTAATTTAATTCACATTTCTCCGCGAAGACTTTCACGTTGTGGAGAAGCACCAAGGAACCAAAA
CmoSSR01012	p2	(AT)9	Cmo_Chr01	9097027..9098050	CACCTCAACGATTTGGATCA	59.5	TGGAACAATAGTGCGTTGGA	60.11	CACCTCAACGATTTGGATCAAATCATTGGTATTCTATAGACTTTTTAGAATATTACTTGAATATATATATATATATATAATCTTGAATTGCATTTATAAAAACAAATATTTTACCAACATTTCAAACACAGACAATTAGAGTGTCATATAGTTGGTGAAGAACTCAGTCTATCATCTTCTTTCTACCTTCAACTATTGCCACGTCTCAGTCTTAATAGATGAAAGAGCAACACAGTTCTGAAGCCTGGACATCCAACGCACTATTGTTCCA
CmoSSR01013	p2	(CA)12	Cmo_Chr01	9101411..9102440	GCGATGCAATCTTCAAGTCA	59.96	ATTTGGTGAAGTGTTTGGGC	59.84	GCGATGCAATCTTCAAGTCAATGAATTCGATGTCAATGATGAACTTTCCTGTTAATGGAACTTCAATTGGCCAAATAAAATCGTCGTTGTTCTTAAGCTGTTTGTCTATTATGTCTGCATGGATGTGGTGGGGTAACAACATTGGTCAATAGAGGAACTGAAGGTCATAGAGAAAAGAAGAAATTCTGGAAATTAAGACTTTCTCCCCCTCCCCCTTCCACACACACACACACACACACACAAGGGGAGGCAAAAGGATAAGAAATGAAGGCCCAAACACTTCACCAAAT
CmoSSR01014	p2	(TC)9	Cmo_Chr01	9108019..9109042	TCGTCGGAGAAATTGGAAAC	60.05	CTACTAGCGGTGGGCTTGAG	60.03	TCGTCGGAGAAATTGGAAACTCGTCGGCGTTTATCCGAAATCTCTCTCTCTCTCTCTCGTATTTTCTTTCTTTTCTCTGTTTGCAGGTATCCTGATAGGTTCTGGAAGTCGTGGATTGAAGGTTGAGCAAGGTGTGGCTATCGTTTTGCGTGGGATCTACGATTGCCAGAAAACTCGTGAGTTTTTCGGCGACTGAGTTTTTTTTTTCTTTTTCTCTTTTTTTTTTCGGTCATTACACACTCGATGTCTAGCTCTGATACCATTTGTAACAGCTCAAGCCCACCGCTAGTAG
CmoSSR01015	p2	(TA)9	Cmo_Chr01	9110729..9111752	GATGGACAGCCAATAGTGACC	59.42	TGTAAATGCAAGGCACATGA	58.7	GATGGACAGCCAATAGTGACCACTGGTTTTCTTTTTATTTGAAGAGGATATAATTCTTAGTTTGAAAATATTTCCTTTTTTAAGTTGATGTACTAATAATTGATTCATTGATTTACAATAAATAAATGATTTTATTGGTATATATATATATATATATCTTAAAGGCTAAGAATTAGAAATGGGCTTCTCTTTTTCTTTTTCTTTTTCTTTTTCTTTTTCTTTTTTGCAACATAGATGGTGTCTTCTATTTTATCATGTGCCTTGCATTTACA
CmoSSR01016	p6	(TCTTTT)6	Cmo_Chr01	9110778..9111819	GATGGACAGCCAATAGTGACC	59.42	TGTAAATGCAAGGCACATGA	58.7	GATGGACAGCCAATAGTGACCACTGGTTTTCTTTTTATTTGAAGAGGATATAATTCTTAGTTTGAAAATATTTCCTTTTTTAAGTTGATGTACTAATAATTGATTCATTGATTTACAATAAATAAATGATTTTATTGGTATATATATATATATATATCTTAAAGGCTAAGAATTAGAAATGGGCTTCTCTTTTTCTTTTTCTTTTTCTTTTTCTTTTTCTTTTTTGCAACATAGATGGTGTCTTCTATTTTATCATGTGCCTTGCATTTACA
CmoSSR01017	p2	(AT)11	Cmo_Chr01	9111204..9112231	CATTCTTGCATCACCTCGTG	60.26	TGACGGATCTTGCCTTTTTC	60.19	CATTCTTGCATCACCTCGTGAATATCTCTACTCTGTATAATACCATTCAATCTCACACTTGATATGGAAAAAGGAATAAATGAAAAGAGTAGTAAATTGATAAATTGATACAACATATTTGCCTATCATGAAGGTCAAATATGGTACCTATCGAATATATATATATATATATATATCTTCTATCGAATAAGCCTGCACTTCCTTTGTTGAAGTAAGTATAAATGGTCTGGTTCAAAATTTCCTACAAATAGACTTAGTGAAGTTGATACTTCCTATATTAGAAAAAGGCAAGATCCGTCA
CmoSSR01018	p2	(AT)9	Cmo_Chr01	9116955..9117978	TGCAATTCAAATAAGAGGCAGA	59.85	CGGTGAGATCGGTGAGAGAT	60.22	TGCAATTCAAATAAGAGGCAGATATTTAAAACTAATTATTATTGTGCGTATAATTTTTATTAAGTAAAAAAAAAAAAAAAAATATATATATATATATATAATATTCCACTTTAATATAGAGAAAAATTGGAAAATAAAAGTTTAATTAATTAATTTTCATATTAATTTCAAAGCTTTTGTCACAGCGAGGAAATAATTGGAAGAAATTCTGTTTAGACAGCTTCTGGAGATATCTCTCACCGATCTCACCG
CmoSSR01019	p2	(AT)19	Cmo_Chr01	9129586..9130629	GAGTTTTTGGGTTGGACGAA	59.95	TTTTTCTATGCACACACGCA	58.91	GAGTTTTTGGGTTGGACGAAAAAGAGATATATATATATATATATATATATATATATATATATATAAATAAATAACTAAATGATGTATGTATTTGTACTCATATATCTATTAATTAATTAATTAATCAAATTTCTATTTTTTTTTACATAGAGCTATTTTACCTTGTGAAATATTAATATTATATATATATATATAAATAAATGCGTGTGTGCATAGAAAAA
CmoSSR01020	p7	(CAAGTGG)4	Cmo_Chr01	9131819..9132852	GAATCAGACCCCATGCAAGT	59.93	GATGAGGACCATCGAAAGGA	60.01	GAATCAGACCCCATGCAAGTACATGGACACGTGTCACAAAGTTAGCCTAAAGGGGGTTATCGAGGTTGGATAGAAGAATGAGTGATGGCTTTCCAAGACAAGTGGCAAGTGGCAAGTGGCAAGTGGCAACTCATCCCCTCGATTATCCATCTCCCATACTTGGAACAATACTCAAAAATCCTGTTGGTTTGTATCCTTTCGATGGTCCTCATC
CmoSSR01021	p3	(AAT)12	Cmo_Chr01	9143303..9144344	AACAAACAGGGGCAAAAGTG	60.01	GGGGAACTATGAACGTTGGA	59.79	AACAAACAGGGGCAAAAGTGGAATTTCACTCCCAACTAAATATATGGAAATGCAAAGAATATATAGATTAGTGATTTTGTTTGGTTTTTGAAGCACAAAATCTAATAAAAAGGTTTTTAACTAAAATAAATAATAATAATAATAATAATAATAATAATAATAATGGGGTTAAATAAATGGGGCACATAATGTAAAAAAGAAGGGCGCATGGCCAAAAGTTTGCCTCCATAATCATTTGAGTTTGGAGGATCCAACGTTCATAGTTCCCC
CmoSSR01022	p8	(TTTAGGGT)3	Cmo_Chr01	9143705..9144734	TGGTCGATGGCATATGTGTT	59.81	TCCTTTTGAGTTTCCCCTCA	59.64	TGGTCGATGGCATATGTGTTAACTGTTTGAGTTATCATCAAATCGACATTTTTAAGTAAAACTAAACACAAAAGTATCCGATGGTTTAGGGTTCAATATAGTCTAGGGTTTAGGGTTTTAGGGTTTTAGGGTTTAGGTATGGTCATCCAACACCTAATTTATGATGTCCCACGTTAGTCGGGAAGGATAACAAAACACCCTTTTATAAGGGAGTGGAAATCTTGCTCTAAAGATGTGTTTTAAAGCCTTGAGGGGAAACTCAAAAGGA
CmoSSR01023	p2	(TC)9	Cmo_Chr01	9144988..9146011	TGGACTTATATAGACACTCCAAAACG	59.87	AACGAGCTTCTCGTGATCGT	60.02	TGGACTTATATAGACACTCCAAAACGTTACAATTGAAGCTTTCATTAAATTCTTCATCTCTCTCTCTCTCTCTCAAACTTCCCCCACGTCGAAGGAGCATTTACTAATCCGGTTCTGATTTTCTTCTTCTTCTTCTGAGAATCCTGACATCAACGATCACGAGAAGCTCGTT
CmoSSR01024	p2	(AT)13	Cmo_Chr01	9146093..9147124	TTTCTGGTTGACTTATGCTCACA	59.8	GATGTTGCAGTGTCAAATTACCA	59.92	TTTCTGGTTGACTTATGCTCACATTAATATTATAATTTAAGTTTTGTTATAATAATTTTTTTTTAAAAAAAGAATTGTTTGGTTTCTTCCTTCTATATATTTAGTTGGGAATATATATATATATATATATATATATAATATTTCCTTTATTTTTTTGCCATATTAAAAAAATTAGTTAATTTTGAGAATGTAATTCTTAAAACCTATGAAGTGAAATGAAGTAGGGCTAAAATGGTAATTTGACACTGCAACATC
CmoSSR01025	p2	(AT)11	Cmo_Chr01	9181099..9182126	GGGCATTGTTGCAATAGAAGA	60.09	CACTTAACGTCGTTCGAGCA	60.05	GGGCATTGTTGCAATAGAAGACAATGAGAAGGGTATTTAAGTAAAAAGGCTCATAATGGAAGGAGAACTACTTAAGTCCTCAAGAAAATTTAATTCTTTAATACATATATATATATATATATATATTTTTTTTTATTTTTTTTTTTTTATTTTTTTTTTTTTTGAGATCGTGGGATAAGATTACCAGAAGAACCAAGAGATCTTAAATTAATGTTGCTCGAACGACGTTAAGTG
CmoSSR01026	p2	(AT)22	Cmo_Chr01	9184521..9185570	TCATATTGCCATAAAGCGCA	60.2	GTCAACCAAGTGAGTGGCCT	60.16	TCATATTGCCATAAAGCGCATCAAGCATATCAAGTACGTCATTCATCGATATATATATATATATATATATATATATATATATATATATATATACTACACACATCATCATACACTTATACATCATCATATATTAACATACAACAGAGTTCATACATCATCATTACTCGTACAATTTTTTATCATATCCTAAAGTAAGGCCACTCACTTGGTTGAC
CmoSSR01027	p2	(TA)10	Cmo_Chr01	9199051..9200076	CCACCATGGGAGCAGTAAGT	59.99	CTAAGCCGGCCACAAATAAG	59.74	CCACCATGGGAGCAGTAAGTTACTGAAGTTTGCTGTCATTTTTTAGGCTGTCCCCTTCACCAAAGCCACCCTTTTCTATGCTGTCGCCTTCACCAAACCCTACTTTTTCTCCGGACTCTTCTTCCCAACACTGTACAACGTGCCCTCTATATATATATATATATATAGGGACCCCAAGTCCTAAGTTCTTATTTGTGGCCGGCTTAG
CmoSSR01028	p2	(AT)24	Cmo_Chr01	9219150..9220203	CGTCAATTCTTGGGAGTTACC	58.57	TTCATCTTGCATCGCATAGC	59.94	CGTCAATTCTTGGGAGTTACCAAGTTTGACTAATTCTATTATTCTAATTTTTCTATAAAAAAATGTTCTCCTTAATTCTTTTTCATATATATATATATATATATATATATATATATATATATATATATATATAATGTGACGAAATAGGCTATGCGATGCAAGATGAA
CmoSSR01029	p4	(CAAA)6	Cmo_Chr01	9228012..9229041	GCAAACTATTCAAACCCGGA	59.94	GCTTCTCGATCGGTATGAGC	59.95	GCAAACTATTCAAACCCGGAATTGAACAATCCTTAAGGAAATCAAACAAACAAACAAACAAACAAATCAAATTGGCGAATCGAAGCAAGAAAACGGAAAATTCAGCAGGAAGAAAAGCTCATACCGATCGAGAAGC
CmoSSR01030	p2	(TA)9	Cmo_Chr01	9228325..9229348	CGACTTTTGTAAATTGGGGC	59.45	CCAAAATTAATGACAACCTTCCTC	60.11	CGACTTTTGTAAATTGGGGCAAAAGTGGTCTTATTGGATACGGAAAATCCTTTTCCTATATATATATATATATATTTATTTATATTTATATATATATTTATATTTATATTTATTTATTTATTTATGTTTTGGAAGGATTTTTTTTATAGCGACATTAGAATGGGTATTTTAAGCAAATAATTTAATTATAATTAATTTGTGAAGTATTTATTATAAATCATATTTAAATTTAATTAAAATTATTTTTTTAAAAAAAATTAATTTTTGAGGAAGGTTGTCATTAATTTTGG
CmoSSR01031	p6	(GCAACA)4	Cmo_Chr01	9260269..9261298	GTGGAGGTGGGATTAGGGTT	60.05	CACCAGCCCCATTTACATTT	59.69	GTGGAGGTGGGATTAGGGTTGAATTAGGGCAAGGGAGTAAAACCAACGAGTTGGAGGAGCGAAGTAGTAATAACGCAGCTGCGCACCAGCCTCCGCAACAGCAACAGCAACAGCAACAGCACCACCCCCAACCACCGCAGGGTGGGCTTTTAGGAAACCCTGGAAACGTAGAAAATGAAGGCTTGTTAAGGCAAGGTGGTGGAGTAAATGTAAATGGGGCTGGTG
CmoSSR01032	p2	(AG)9	Cmo_Chr01	9267209..9268232	CGATCGCCTTTTGTCAAGTT	60.25	CGATTATGTCCACGCTCGTA	59.71	CGATCGCCTTTTGTCAAGTTGAGTTTTGTAATGCTTCTTCACCATACGTTTTTAGCTTTTAATTCTGTCTTCTATTATATATGCGTTGGCATACTTAGGATTTGACTTCCAAATTTTTTTCCGCTTGGTTGTCCATAGGAAAATATCCCGATCATGATCATGATTCTAAAAGGCTAGGTGATAAAAGAGATATAGGTAGAGAGAGAGAGAGAGAGATAAGGATCATGATCACAATATGAAACGTTGTCGAGATTACGAGCGTGGACATAATCG
CmoSSR01033	p6	(AAAAAG)4	Cmo_Chr01	9269100..9270129	TTCAGGTTTGGGGTCAGTGT	60.4	TTTCTATCCTCTGGCCTTGG	59.26	TTCAGGTTTGGGGTCAGTGTGGGAACTTCCTTTGGTTCTGGACGGTGAGTTTTGAAGAATTTTTTCACCGACTCTTTAGAAAAAGTAAATAGAAATTTCACTCAAAATCAATCTATTAAACAGTAAATTTTCAATTATATAAAAAGGGAAAAAAACAAAAATAGTAGCAAGAAATTGTCTAATTTATTTATTTTTAAAAAGCAAGTAGAAAATGAAAGGGAAAAAAGAAAAAGAAAAAGAAAAAGAGAAGGACCCAAGGCCAGAGGATAGAAA
CmoSSR01034	p3	(GAC)7	Cmo_Chr01	9270958..9271984	GGTCCGAGATTTGACTGGAA	60.05	GCGCTTCACTCTGTTCATCA	60.14	GGTCCGAGATTTGACTGGAATCGGATTTTTTGTTCGCGAGGAAGAAAAACGAAGGGATTAGAAGAAGAATAAGAAGACTAAGGAAGGAAGGTGAGAATCGGAGACTGAGAAAGCAAATTGAAGCTAGAAGAGTTGAAACAACGACAACATTGAGGCGTGATTGTTTGGAAGAAGAAGACGACGACGACGACGACGACGGCGGCGGCGATGATGATGAACAGAGTGAAGCGC
CmoSSR01035	p3	(ATA)7	Cmo_Chr01	9272140..9273166	AAAGTTGTTGTACGGTCCGC	60.04	CAGCACCAAATGGGTCATAA	59.4	AAAGTTGTTGTACGGTCCGCACGAAATTAAAATGACATTTTAATTTGAATATTATTATTATTACTATTTATATAAATAAAAAAAAGACAAAACATTGAGACAATAATGAAAGACATTCCAACACAAATAGCTGAATTAGTTAGATGAGATCAATAATCTAATTATAATAATTAAAATTAGACAAATTTTAAGTCTAGATCTAATAATATAATAATAATAATAATAATAAAGAAAAATATTAGGTTTAAATTAGACAAATTTATGAGTTCATGGTTATTCATTATGACCCATTTGGTGCTG
CmoSSR01036	p4	(TATT)5	Cmo_Chr01	9273555..9274580	AGCATGCTTATCATCATCTCG	57.96	TCGAACAATTCGATCAACCA	60.05	AGCATGCTTATCATCATCTCGTATTATAATATATTCTTTGATAATCTCCAACGATACTTTAATAAAATTTGTAAAATATTTTTTTAATAAAGGTAAAATGTTAGTCCATAAAATATTTATTTATTTATTTATTTTCAAACATTTAAATAAAGTTTACCACTCAATTTGAATATATATTAGCATGCTCGTGTCCGTCTTTGAGATATCAAGTTTGGTTTTGGTTGATCGAATTGTTCGA
CmoSSR01037	p3	(TTA)7	Cmo_Chr01	9296325..9297351	CGACAACCTTGATTGTGGAG	59.13	ACGGCAAGGATCCAAAAGTT	60.86	CGACAACCTTGATTGTGGAGTGATTCCAATCTCAAACAATATTCTTGCCTTGAGATATTCACAAGGTAATCCGAATCTTACTCCACTGTAGTGATTTACACATATCAAAACTCACAGGAGGTATTTATTATTATTATTATTATTATATCATTAATTTAGCCATTTTTTTATTTTGAGAAAAAAAGGGTTTAAACACCAACTTTTGGATCCTTGCCGT
CmoSSR01038	p3	(CTT)12	Cmo_Chr01	9296715..9297756	AATGTCCCCTCCGATATTCC	59.98	GGAAAGTACCATAGCTGGCG	59.73	AATGTCCCCTCCGATATTCCGATCCCGATTTATTTCCTTGCTAAAGAATCGCCATGGACGTCTTATGAGCTCCGACCTCGCTTCGACCCCTTCCAAGGATTCCATCATTGCGTCCCAGAAGCTCGTCTCCGATCAGATTCCACCCGATGCGCAAGCCACTTCTTCTTCTTCTTCTTCTTCTTCTTCTTCTTCTTCCTCTAAGCCCTTGAATTTCCTCAAGTACAGTTTGATTAGTGCTCTGACGGCGACTACTGCAGTTGCTGGTTACGCCAGCTATGGTACTTTCC
CmoSSR01039	p2	(AT)28	Cmo_Chr01	9328243..9329304	TGCGTGGTTTAATGATTCCTC	59.95	GGTCAAAGTTTACCATCAACCC	59.61	TGCGTGGTTTAATGATTCCTCTAAAATTAGATTATCTAAAATTAGATTGATAATGATTCTTCTAAAACTAGATTGAATTGAATCAGATCATCGAATTTATTGTTAATTTTAAAATATATATATATATATATATATATATATATATATATATATATATATATATATATATTTTATCACAATACAATTAGTTTAGTGGGTTGATGGTAAACTTTGACC
CmoSSR01040	p5	(GCACA)4	Cmo_Chr01	9336415..9337440	ATGGAAAGCAAAGTCCCCTT	59.94	TCGCGAAAGTTAAGGGAAGA	59.95	ATGGAAAGCAAAGTCCCCTTGATAAGGCACAGCACAGCACAGCACAGAACAGAACAGCCCCTCAGACAAACAGACTTGAAATCAAAAACCAATAATTGAATTCAACAAACGCCTACAAAAGCTACATTCCTGCCTCTCAATCCATCTCTCTCCTTGGAACTCTCTACTTGGCCTTTCCATCTTCCCCCACCTGCTTCTTCCCTTAACTTTCGCGA
CmoSSR01041	p2	(AT)11	Cmo_Chr01	9365602..9366629	TCATAGCACAAGAAACCCCA	59.12	TTCCGTCCTTTGAAATCTGA	58.27	TCATAGCACAAGAAACCCCATATTAAATTTTGTCCCGTAACAATATATTCCCTACCACAGTAATGGTAGAAAATAAGATATTTAGTGAAAATAGCATAATATATATATATATATATATATAGATATATAATATTTCAAGACTTTTAACAATGAATCAAGGTAGATTAGAGATAATGTTATAAGTTCAAACTTGAAACTGATGTCATGAGCTCACATAGATTGATTCAGATTTCAAAGGACGGAA
CmoSSR01042	p3	(TTA)21	Cmo_Chr01	9372184..9373252	TTTTCAAACGATGACGTTGC	59.71	AGGATGAATCACAACTCCACAA	59.45	TTTTCAAACGATGACGTTGCAGGTTATTATTATTATTATTATTATTATTATTATTATTATTATTATTATTATTATTATTATTATTATTGTTGTTGTTGTTGGGAAAAAGAAATAAAATAAAATATTGTATGTGGAGAAAATGAAAGGAAAATCCACTTTAAAGCCACTCATTGAAATAAGTTGTATGTGCTTAGAATCCACATTGTGGAGTTGTGATTCATCCT
CmoSSR01043	p4	(ATTT)5	Cmo_Chr01	9374071..9375096	TCCAATCCCAATAATGGAACA	60	GGTTTTATTGGTGGTGGGC	60.04	TCCAATCCCAATAATGGAACAATTTTTGTACCATTTATTTATTTATTTATTTACTTACAAGAAATTGATATTTTGATAAATTTTAGTCGGTAAATGAATATAAGGTTTTTTTACTTTGGCAAAATACAATTTTTAATCTCGACTTTGGAGTCAGATGTCTATTTAGTTTCTAAAATTTTAAAAGATACATTTTAGTCTTCCAACTCCAAAATCTAACTCAAGTCGTCGACTTTCGGGGTGGGCCCACCACCAATAAAACC
CmoSSR01044	p2	(TA)9	Cmo_Chr01	9399793..9400816	GCCCGATACATAGAACACCAA	59.84	GAATTGAAATTTCGAGAGCTTG	58.14	GCCCGATACATAGAACACCAATTATCCTTTCAAAAATTGATAGTTTGATCTTTTTCTTGAACTTCACAAAATATATATATATATTTTGTCACAACATTTTTTCTTTTATTTTTACATTATATCCTTCACGTCCTTAGTATTTGACATTTAAGAATACCATTATATATATATATATATATGATTAAATTAATCAGCATTCATGATATAAATTAAATAAATGTAATGGAAAATCTCCAAAAGAAAATAAAAATAAAATTATCCTATTGTAACAAGCTCTCGAAATTTCAATTC
CmoSSR01045	p7	(TTCCGAC)3	Cmo_Chr01	9402035..9403061	GTGCATTGAAATCCTCCGAT	59.9	TGGTCTCTGCTCAGGGTTCT	59.99	GTGCATTGAAATCCTCCGATTCAAATTCGAAGTTATTTACAAAATGCTAATCGAGTTATAATCAACTTCACCAATCCATTTCCGACTTCCGACTTCCGACTTCATTTTCAACTTCTTCCAACACAAAAAGTAAATTAACCTTCTACCTCCCAACGATTCACAAAGCAAAAACAAAAAAGACAACGAGATAACTAAAATCATAGAGATTAATCCGAACATTACACTCACCACTCAGAGTCTGCCATGGAGAGGTATTATTAGAACCCTGAGCAGAGACCA
CmoSSR01046	p5	(TTTTG)4	Cmo_Chr01	9406345..9407370	GAGAGAAATGGGAGTGCTCG	59.95	TGCGAATTTTACAGCAACGA	60.39	GAGAGAAATGGGAGTGCTCGACACTGTCAAGAACATCGGCAGCGACCACGCCCCGGTCGTCCCCTTGACGTTGTTCGTTGCTGTTCTCTGTTTATGCTTGGTTATTGGCCATTTGCTCGAAGAAAATCGTTGGGTTAATGAATCCATCACTGCCATTATCATTGTATACTCTCTTCATCTAAAATCTAGCTTTTGTTTTGTTTTGTTTTGTTGATCATATTGATTCCCTCCTCTTAGTAGTCTAAGCACACTAATTCCACAATAAATACTTTATCGTTGCTGTAAAATTCGCA
CmoSSR01047	p2	(AT)12	Cmo_Chr01	9417633..9418662	GACCTTGGTTTGGGAGTTCA	59.94	TGATTTCATTCGCACGAGAG	59.95	GACCTTGGTTTGGGAGTTCACGGGTTGGGGTTGGTCCAATGCCAATGCATATTTTAAATCTATCTGCCTTCTAATATATATATATATATATATATATGCTATTGATGCTCGCATCATTCACGGAAGTTCTCTCGTGCGAATGAAATCA
CmoSSR01048	p2	(AT)9	Cmo_Chr01	9418715..9419738	ACAAATGGAAACCACCCAAA	60.07	GATTGGGCAGAAGAAGGACA	60.2	ACAAATGGAAACCACCCAAAGGACTTCGGCAGGCAATTGCAAAATAAACTCTGCCATAAGCCCCCATCTTACATTCCCAAGTTCACACCTTACTTACTAACCTTAATATAACATCCACAAGTACAATATTAAAATCACTGCTTACAACATTTCATATATATATATATATATCGACTTTTCCGAACACTGCACCGATATAAGTCGCTAACGCCATCGATCTGCAAATGCAATCAAGGATCGATGTTCATTAGTTTGTCCTTCTTCTGCCCAATC
CmoSSR01049	p3	(GCT)8	Cmo_Chr01	9424245..9425274	CGGAATCGCGTAAGAGACAT	60.24	AAATGGACGGCTTTGTCATC	59.94	CGGAATCGCGTAAGAGACATTGTAAAGCTTCAGAAAGCTCTTGGTCTGAAACCATTTTAGCTTCTTGTAGCTGCTGCTGCTGCTGCTGCTGCTCAAAATTGGTTCATAAATTAACCGAAATTAACGGTCCCTTGCTTCCTCGGCTTCACTCTATCTCTCTCAAGAACTCTCTCTCTCTTTCTCTCTCAAGAACTCTCTCTCTTTCTCTCTCTTCTTCTTCTTCCTTTCTCTCTCTTTCTGTGTGTTCTGTGTAGAAACACAAGATGACAAAGCCGTCCATTT
CmoSSR01050	p4	(TACC)5	Cmo_Chr01	9426803..9427828	TTCACGGGTTCCTATTTTCG	59.93	TCCAGTCCTGCCACTTAACC	60.11	TTCACGGGTTCCTATTTTCGCTGCTAACTTCTCTGAAATGTTTGAATAGTTTATTGTGTGGATTGTGTCTCTGCCAAAGACCATACAGGTACCTTTTCGTCTCTCTCAATTACCTACCTACCTACCTACCTTCAGAGTTTTCTTTCATTTCAAGAACTCGTGATTATTATAGTTTGAGAGAAAACGAATATCCTCTGGGATTAAAGAGGAGATTCTCAAGCATGGTTTTTATTGCAGCTCATTCAATTTAGTGGTTAAGTGGCAGGACTGGA
CmoSSR01051	p2	(TA)12	Cmo_Chr01	9429648..9430677	TGCATGTAGGGCTCTCTTGA	59.55	TGCAACTGGCAGAAGTTCAT	59.45	TGCATGTAGGGCTCTCTTGATCTTGTTCGATTCTATCTACCTTTTCTTTGACAGTTTTTTTTGCATTCTTTTTGTGCTTATTCATGAGTCATTATGGAAAGGACATACAGTAAGAATCACCGGAGGTTCAATCTCACCTAGATTTATGACTTTTGTCATTATTATATATATATATATATATATATATTTTTTTTTTAAATTATGAACTTCTGCCAGTTGCA
CmoSSR01052	p6	(TCTCTG)4	Cmo_Chr01	9437525..9438554	ACTGCCTCTGTCTCTGTCCC	59.43	CAACATGTCTCCCAGCTGAA	59.83	ACTGCCTCTGTCTCTGTCCCTATCTCTGTCTCTGTCTCTGTCTCTGTCTCTCTTATATACGGTTCATTATATAAACACAGAACAGACTTACAGGTAAACATAATATAAAATAACATTCCCCTAAGAACCTGAAAGGTCCTAAGCACATAAAGCCACGTGTCCTACCTTCTACCTGCCCTGATAGTTTCTTCAGCTGGGAGACATGTTG
CmoSSR01053	p4	(GGCT)6	Cmo_Chr01	9450999..9452028	CGTATTCTGTGCAACCGTGT	59.64	TTGCATCCTAATAATTTGTGCG	59.99	CGTATTCTGTGCAACCGTGTTAGATTATACTGTAAACAACGTGCTGTTGATTCTAAGTCCTTGTGTTGTTGGCTTTTAGACATTTAATCTGTTGGTTATATTCTTCTAGGATATACGGACTGCTAATTTTGTAACACTGAAGATTCAGGCGCATGTATCTAGGCTGGCTGGCTGGCTGGCTGGCTGGCATATAGTACTAAGATTGTAATATGAGTTTCTAGGATTTAAGGTATCGACGCACAAATTATTAGGATGCAA
CmoSSR01054	p2	(AT)12	Cmo_Chr01	9451518..9452547	CCAGCGTTTTCTATCGTTCC	59.71	TTATAAAAGGGCAGCAAGCC	59.34	CCAGCGTTTTCTATCGTTCCGTTGAAGGTATGCAATTGGTAAGCTTGATGATAAAATGTAATAACTTCATTGTTTAAAAACAGATCAGAACCTAAAAGGTGCTTACTAAAACATTGTTATAGATAAATGTAGGAGATCAAAAAGTCCTGTATTTGTAAATCCCATGCCTCTCTCATTGTCCATTGGAAATATATATATATATATATATATATTTTGTAATTCTCATGGCTTGCTGCCCTTTTATAA
CmoSSR01055	p2	(AT)11	Cmo_Chr01	9452234..9453261	AATAGAAGCTTGGGCCTTGG	60.57	GTTTTTCCTTTTGGGCTTCC	59.92	AATAGAAGCTTGGGCCTTGGGGTGGGTGCAGAATTAAAATATATATATATATATATATATTAGAAGCCATTGCTAGATGTAAATTGTGAGATCTCACATCGGTTGGGGAGGAGAATGAAGCATTCTTTATAAGAGTGTGGAAACCTTTCCCTAGCAGACACATTTTAAAAACCTTGAGGGGAAGCCCAAAAGGAAAAAC
CmoSSR01056	p3	(AAG)9	Cmo_Chr01	9459694..9460726	TGCGTGGGAGAGAGAGAGAT	60.1	TCAATTTGGCGGTCTAGGTC	60.07	TGCGTGGGAGAGAGAGAGATACAGAGAGATACAGAGAGATTCAGTCCTTCAAGAAGAAGAAGAAGAAGAAGAAGAAGACGAAGAGATGTCTGACCTAGACCGCCAAATTGA
CmoSSR01057	p2	(AT)12	Cmo_Chr01	9475056..9476085	GGACGATGATCGAATCCCTA	59.85	CTTGGTCGGGGATGAAATTA	59.76	GGACGATGATCGAATCCCTACCGGAAAATTTTTACATTTTTAATATAATTTTTTTAAGAAAATATATTCATTTAAAAACAAATTTAATGTATAATTTCTATTTTTCAATATAATTTTTATTAAAAAAAAATGTAAAACATCATACCACATTAATTTCTAAAAATTTAAAATTTAATATTATAGTATAGAAATATTTATTTATTCACTAAATAAATAAATATATATATATATATATATATATTCGGAGATTTGTCGGGGTCGAAGTTGGAGACGGGGAATATAATTTCATCCCCGACCAAG
CmoSSR01058	p2	(TA)17	Cmo_Chr01	9482111..9483150	AACGCACGATCTCGAAGAAT	59.84	TTAAACTACACAACCACCGCC	59.91	AACGCACGATCTCGAAGAATGAATTAAAGACATACTCGTGACTTGATCAACGAAAACCATTGAATTTTTTATACTAATACAATAAAGTTAAAATGCGATCATTTTTTTTTAAATATAATAGAAGATCGTAGACAAATATTTTAATTTATATATATATATATATATATATATATATATATAATAGTTAACTTCCAAATTTATTTTTTTATTAAATTTTAGTTATTAACGTGAAATAAAAAATAAAAAAAAGGTAAGCTAACAATTCGGCGGTGGTTGTGTAGTTTAA
CmoSSR01059	p5	(TTTTA)5	Cmo_Chr01	9493689..9494719	AAAACTTCGCAACAATTGGG	59.97	GTCCACATACGCTCCTCCAT	59.96	AAAACTTCGCAACAATTGGGTTTAGGGGTTTTTTATTTTTATTTTATTTTATTTTATTTTATTTTTATTTTCATTTTCATTTTTATTTTCTTAAAAGATACAAATGGAGGAGCGTATGTGGAC
CmoSSR01060	p2	(TA)11	Cmo_Chr01	9494097..9495124	TCGTCTGTCACGTCAAAAGAA	59.47	TAATGGCCGCAATATTCTCC	59.89	TCGTCTGTCACGTCAAAAGAATTTTTATATTTAATCCTTTTATATATATATATATATATATAAAATGTTATTCAAAAAGCTTATATTTAGGTGATCTCTTGAAAATGAGGATAAAACAGGACTAGTAAGTAACGTGGTCATGTCGTAATGGATATAGGAGAATATTGCGGCCATTA
CmoSSR01061	p3	(AAT)7	Cmo_Chr01	9495295..9496321	AACCCAACTCAACCCGTGTA	60.27	TGTGTTGGAGTGCATGTGAA	59.71	AACCCAACTCAACCCGTGTACGCCCAGTATAAAATATTGTGTAGGAGAATAATAAAAAGAAAAATTGTAAAAGAAGAAAAAGGAATAATGAAAAGATAATACAATAATGAAAAATATATCTCACATTATACAATTCCCTCCCTTTATTGATGGGATTAATTGGGAATAAATAATAATAATAATAATAATAAATTCTATGCTTTCAAATTAGTATAATAATTGTAATTAAGAGACATAATTAATAGACTAAGATAGCTTCACATGCACTCCAACACA
CmoSSR01062	p4	(TTTA)6	Cmo_Chr01	9499815..9500844	GCTCCGTAAAGAACCGGTAA	59.22	CCGCCGTTAAGTGAATTTGA	60.99	GCTCCGTAAAGAACCGGTAAATATATTTTTAAAAGAAATTTGACCGCAAATATATATTAATAATATATTATATTTATATTTGATCAATTAATTTGACCCGTTAATTCATATTCATTTAAAAATCTACGGCCCACATTATTTTAATTTAAAATAAGCCTTATTTCAACATTTAATTCCTTTATTATTTTTATTTATTTATTTATTTATTTATTGAGGTTGAGGGTCAAATTCACTTAACGGCGG
CmoSSR01063	p2	(GA)9	Cmo_Chr01	9503696..9504719	TTCCTCAAAATCGAAGGTGG	60.04	CCTAATCTCCGCCATTTTCA	60.03	TTCCTCAAAATCGAAGGTGGGGTGTTGATTTTGATGCAAAATTTGCAGAATCCAGAAGGGGAAACGGAACGGGAAGACGAAGGAGAAAGCGAGAGAGAGAGAGAGAGATCGAGAAGCGAGGAAGGGTAAAGGGGTATAACTGTGGGGTTGAAAGTGGCTGAATGGAGAGTGAAAATGGCGGAGATTAGG
CmoSSR01064	p2	(TA)9	Cmo_Chr01	9504279..9505302	CAGCTCCAAAATGACCTCAA	58.85	TGGATTTGGGCCGTTAAATA	60.14	CAGCTCCAAAATGACCTCAATTACTCGACCGGTCGGAGAGGTCGAAACTATATATATATATATATAATTTCTATATGAAATTGTAATATTACCATCAATACTTCATAAATATTTTTAAAAAATACGGAGTATAAAGAGTGTCGGAATATTAGACAAAAAATTGATGTGTATGAATGTTTAATATAATCAAATATCTCGGTTTTCTTTTCTTTTTTTTCTTTAAAAATTACCTAATATATATATTATTATTATTATTATTTAACGGCCCAAATCCA
CmoSSR01065	p7	(TTTTATT)3	Cmo_Chr01	9511508..9512534	GGCCAAATTATCCTCGTCAA	59.9	CTTGCGTCATTAGCTCCCTC	59.98	GGCCAAATTATCCTCGTCAAGTGAAGAACGATTCCACCTACTTGAAAGATCCCTGGTGATTGGATTTAATATTAGTTCGATGTAGGTGCACAAATTTGACGAGTAGCTGATTATTTTATTTTATTTTTTATTTTTTATTTTTATTTTTATTTTTGCAAAACTTAGGATGAAAGCAGAAAGTGGCACATGTGGAGGGAGCTAATGACGCAAG
CmoSSR01066	p4	(AATT)5	Cmo_Chr01	9527368..9528393	CCACCTTCCTATTGTTGGGA	59.78	GGCATGCTTTCATTGAGAAAA	60.2	CCACCTTCCTATTGTTGGGAGGAGTGGGGAATAACCTCTACATTGGATAATAAACGTTTGTCTTGAGAAAGGCATAGGGACAGCCATGGGTATTTTTTATTTAAATTTTAAATTAATTAATTAATTAATTAGTTTTTATGAATAACCAAACTTTCATTGAGAAGAAAATAATATTTGAGTTTTCTTTTTGTATGTCCTTGTGTTCTTTCATTTTTCTCAATGAAAGCATGCC
CmoSSR01067	p2	(AT)18	Cmo_Chr01	9543540..9544581	CAAGCAAACCCTAAACCCAA	59.97	ACTCCAAGACCCACGAACAC	60.01	CAAGCAAACCCTAAACCCAAATCATTTGGAATTACTTCCACGTTACTCATTCACATTTTCCCACCCATACCCAAAAAAAAAAATATATATATATATATATATATATATATATATATATAATTCTTTCACCTGACCTATGTTCAGTGACAAAAATCTATCGATAAACTATTTGAAAAGGATGTCGTGGAGGTGTTCGTGGGTCTTGGAGT
CmoSSR01068	p4	(TTTA)6	Cmo_Chr01	9544328..9545357	CCTGTCTTCTCCTCCCTCCT	59.8	CAAATTAACAGTCTGAGGACATAACTG	59.58	CCTGTCTTCTCCTCCCTCCTTCCGCCACGTGGCACTTTTATAGTCATTTCAATTTTGCCCCTTCGCGCTCCCTACGAACTCCACCCAACTTGTCGTTATGGCCGGTTCTCCTTTTTTATTTATTTATTTATTTATTTATTATTATTATCCAAAATAAACCCTTTTTTAAATAAATAAATTAATAATTCTTTTTAAAATTAAAATTTTAGCTAATAATAACAAAAGTGTATGTAATTACAGTTATGTCCTCAGACTGTTAATTTG
CmoSSR01069	p4	(TTTA)5	Cmo_Chr01	9544566..9545591	CAGTTATGTCCTCAGACTGTTAATTTG	59.58	TATAAATCCATCGCAACGCC	60.8	CAGTTATGTCCTCAGACTGTTAATTTGATTAATTATTTTTTAGTTATAAAAGTATTATAATTAAAAAATTAAAAGTTTGGGAATTCAAAAAATAATAATAATAAATAAATAAGATTTTATTTATTTATTTATTTATTTTTGGTTACCATTGAAAAAGACGCGGCGTTGCGATGGATTTATA
CmoSSR01070	p3	(TAT)8	Cmo_Chr01	9546277..9547306	TCATCCCCTTGTTCAAGAATC	58.97	AACGGTAACGACAACAAGGC	60.04	TCATCCCCTTGTTCAAGAATCATAGATTGATCAAAGTTTTTTCAAGTCAATTCAAGAACAATAAATCCAAAATATATTTTTTCAAATTTGAAAAATGATTGAGATAATTTGAAGGCAAGTTAAGGTGACAAAATTTAAATGAATTGGAGGAATTTATTGATTTTATTTTACTTTCTAGATTACTTTATTTTTATTCTTTCTTTTTCTTTTTCTCTCTCCTCATCCTAGCATTTTTCTCGTGGTATTATTATTATTATTATTATTATTTTCATCATGCCTTGTTGTCGTTACCGTT
CmoSSR01071	p2	(TA)18	Cmo_Chr01	9549530..9550571	AGTGGGCTTCCATTTTGTTG	59.97	TATTGGGAACTTTTGGGCAT	59.27	AGTGGGCTTCCATTTTGTTGGGCTTTGTTAAAATTATTAAAGGGCAAAATTGAAATAATTTAAGTGGCTTTACATATATATATACCATTATATATATATATATATATATATATATATATATATAGTCTATGAATATATTATTAAATTGAATGAAAGGTTAATTTACGGATTTGCCCTTAATATGACGTAGTTAAATGAGAATACATGCCCAAAAGTTCCCAATA
CmoSSR01072	p4	(ATAA)8	Cmo_Chr01	9565356..9566393	TTGCTTGGCAGGTTTTCAAT	60.62	TGAGCCATTTGTCATTAGCC	58.72	TTGCTTGGCAGGTTTTCAATTAGAAAAGCAACATTGTAGTGGTTATTATAACAAGTACCAAGAGATTTATTTATCAATCAAATGACAAATTCCTCACTCAAGATAAATAAATAAATAAATAAATAAATAAATAAATATAAATATAAATATATATATATATATATATATATATATATATATATATATATATATATATTGTCTTTACAAGTAGAGCTCAAATAGGCTAATGACAAATGGCTCA
CmoSSR01073	p2	(AT)25	Cmo_Chr01	9565400..9566455	TTGCTTGGCAGGTTTTCAAT	60.62	TGAGCCATTTGTCATTAGCC	58.72	TTGCTTGGCAGGTTTTCAATTAGAAAAGCAACATTGTAGTGGTTATTATAACAAGTACCAAGAGATTTATTTATCAATCAAATGACAAATTCCTCACTCAAGATAAATAAATAAATAAATAAATAAATAAATAAATATAAATATAAATATATATATATATATATATATATATATATATATATATATATATATATATTGTCTTTACAAGTAGAGCTCAAATAGGCTAATGACAAATGGCTCA
CmoSSR01074	p2	(GA)11	Cmo_Chr01	9580501..9581528	AGGTTCGGACCTCACAGATG	60.11	CGATGTTGTACCGCACATTC	60	AGGTTCGGACCTCACAGATGCCTCGCGAAAAAGCCAAACAGCATCGAAAATAATGTACCGAAGAAAAGGAGTGAGAGAGAGAGAGAGAGAGAGAGGGAGTGAATTCTAGAGAGAGAAAGTCTCGTAGTGAGAGAAAAAGGGATGGGTCAGATCGTGAAGAGGAAGAAGAAAGGGAGACCATCGAAGGCAGATCTGGCACGGCGGTCCGGTGGAGGACTGACATCATCGGAATCTGAACCGCGACGGAGCCTCCGCAGCCGGAATGTGCGGTACAACATCG
CmoSSR01075	p3	(TTA)7	Cmo_Chr01	9588184..9589210	CAATTTGCAAAAGTCAAGCCT	59.39	GGTAATCGAGTTTTCTTCTGACAA	58.87	CAATTTGCAAAAGTCAAGCCTTACAACTTTGACTAACTTTTTTTTTTTTTTTTTTTTTTCCATTTTCTATTAAAAAGATCTCATCTTATTGGTTTTAATTTTTAACCATTATAATAATTTTTTCAAAAAAAAGTTTATTATTATTATTATTATTATATTAAATATTTATCTTTATACTTTTAGCAACTTCCCTTTAAAATATTAATTTTCGATCTTTATCTTATTATTAAACCTATCAAAAACATCCTTTACGTTTTAAATTTATAAATTATAGAGTTGTCAGAAGAAAACTCGATTACC
CmoSSR01076	p3	(AAG)9	Cmo_Chr01	9589464..9590496	TGGAATCTCAAGGTTTTGGG	59.9	TTGGTTGTCACACGCATCTT	60.16	TGGAATCTCAAGGTTTTGGGAGAATCCGTAATGAATTTGAAGAGAAGATTGCAGTGATTTTTAAAGAAGAAGAAGAAGAAGAAGAAGAAGAAAGAGACGGCTCTATCGTTTGTGGTAAAAGATGTGAAGACGACGTCGTTTTCATTGGTTTTGTTTGTTTTAAATGAAATAGGAAGATGCGTGTGACAACCAA
CmoSSR01077	p2	(TA)16	Cmo_Chr01	9590281..9591318	TTCATGTGTGCATTCGGTTT	59.97	TAAGGTCCGAGAAAGCCAGA	59.95	TTCATGTGTGCATTCGGTTTATTCATGTATCTCTCCTTACTTTTAAGGGAAATTAAGCCCTATATATATATATATATATATATATATATATATTCCCCCTGGTTTTCTGGCTTTCTCGGACCTTA
CmoSSR01078	p4	(AAAT)5	Cmo_Chr01	9594444..9595469	CAAAGAGCAACAATGCTGGA	59.99	GTTCGTGGGAAACACTCGAT	59.97	CAAAGAGCAACAATGCTGGACGAGCTCAGAAATACCAGCAGCTGTAATCTTGTTGCATCGACTGCATTAAAACTCTTCTTAATGAAAAAATAAAGAACTTAAATTATCCAGCTATGCTATTGAACAACAGAGAATAAAATAAATAAATAAATAAATAAAAAAGAGAAGAAATTCATCAATGACACTTGTGAGCTGCACACCTTATATCCACAGCTCTAAGAAGTTTACACGTCTGCGCAACTTTTGTTAATCCAAAATCAGAAACATCTGAACCAGAGACATCGAGTGTTTCCCACGAAC
CmoSSR01079	p7	(GTATCTT)3	Cmo_Chr01	9596645..9597671	TTGAGACGCATCAATGTTGG	60.66	GGACAAATGTCAAAGGGGAA	59.77	TTGAGACGCATCAATGTTGGCGAGTACTTCTTTGAACACTTAGATTGTACCTATGTAAGCATGAAATTCTTCATCAATCATTTTGTGTCGGTACTCCATCTCAAAATGGAGTTGTTGAACGAAAGAATAGGCATCTTCTCAGGGTATCTTGTATCTTGTATCTTGTGATGTTACTTTCTTTGAGAACAAACCTTTGAGTTTAACTTTGTCTAGTATGAATTAGAGGGAGGATGATATCTTTTATCTATACACTCATGTCTCCTACACCCTCTCTAATTCTTCCCCTTTGACATTTGTCC
CmoSSR01080	p2	(AT)14	Cmo_Chr01	9607094..9608127	GCTTTTCCGATCATAACTCACA	59.23	CTACCATACCCAACAAATAATATGC	57.98	GCTTTTCCGATCATAACTCACACTTAAAATTAATTTAAAATATATGAACCAGTCTTTTAACCTTTATTTTATTTTCGTCTATAAACTTTAGTCATTACCTGAAATTAAAAAATAAAAATTACTCGTTCATCCTATCATTATTAGTCTACATTGTTTCTTAATTGATTTAGGCTAAGTTTGTTTTATAAATTTTAGAAGTATGTTTTTCAGTAAATGAATATTAAATTAGACGTATTATTAACAATATATATATATATATATATATATATATTTTTGCATATTATTTGTTGGGTATGGTAG
CmoSSR01081	p2	(TA)18	Cmo_Chr01	9611316..9612357	GATCACCGCAAGATGAACAG	59.25	AGATCCATGCAATCGTAGCC	60.07	GATCACCGCAAGATGAACAGCTCCATTTCTTGTTCCATTTGCTTAGAGGTATATTTATGGTCATACTTTATCTAAAATAAAAATATTTAAATTATATATATATATATATATATATATATATATATATATTTATTTATTGAGATTTTATTTTATTTTATTTTATAATATTTTCAGAAATTTGAAGATGGAGAATTTGGGAGGAGACTTCCAAATTGTGATCATTTCTTCCACGTGGATTGCATAGATCAATGGCTACGATTGCATGGATCT
CmoSSR01082	p5	(ATTTT)4	Cmo_Chr01	9611365..9612390	GATCACCGCAAGATGAACAG	59.25	AGATCCATGCAATCGTAGCC	60.07	GATCACCGCAAGATGAACAGCTCCATTTCTTGTTCCATTTGCTTAGAGGTATATTTATGGTCATACTTTATCTAAAATAAAAATATTTAAATTATATATATATATATATATATATATATATATATATATTTATTTATTGAGATTTTATTTTATTTTATTTTATAATATTTTCAGAAATTTGAAGATGGAGAATTTGGGAGGAGACTTCCAAATTGTGATCATTTCTTCCACGTGGATTGCATAGATCAATGGCTACGATTGCATGGATCT
CmoSSR01083	p3	(AAT)7	Cmo_Chr01	9622807..9623833	CTTTTGTGTAAACTCACATGCACA	60.13	AAGCTTTTGATAGTCACATTCCC	58.71	CTTTTGTGTAAACTCACATGCACAATTTAATATGTGGTTAAATGTCTTTTTCCAATTTTTATTTTTCACAATTTCTTTTTATTTTCACAATTTAAAACAAATAATGTATTGTGGAGATATTGATACAAATCCTAAGTCTTTGACTTTTGAATTTTAACTCATAATATTTTTTTAAATTATATTTTTAACATTTACTCCAATAATAATAATAATAATAATTTGTCCAAAAATATATATAAATAAATATCGACTATCACAAAATAAAACGTAGGGAATGTGACTATCAAAAGCTT
CmoSSR01084	p5	(AAAAT)5	Cmo_Chr01	9623653..9624683	TCAACCACACGTTCACACCT	60.05	AAGCAAGCAAGCCGAATAAG	59.63	TCAACCACACGTTCACACCTAATGGATATTTAAAAAATAAAATAAAATAAAATAAAATTAGATAAATCCAAAATTATGTAAAGATTCTGCTTACTGAAATGTGTTCACACTGGAGATTCCATATTTACCCCTTTTCACATTGCTTTTAATATTATTACTTTTTTGCCTTTCACCTTTTTTTTATTATTATTATTTTTTGGATAAAAATGGAATTTGATTTTGTTTGGCTGGCTCGGCTTATTCGGCTTGCTTGCTT
CmoSSR01085	p2	(AT)9	Cmo_Chr01	9632406..9633429	CACTGGTTGAGAATTGTTTAACG	58.73	CCCGTACATTCGAGGCTATT	59.07	CACTGGTTGAGAATTGTTTAACGTAAGAAAAATATAAGGATAGATCATGAAATAAAAAAAATAATAAAAAAGATTAGTTTAAAAATATTATATATTACAAAAATAATATATATATATATATATAGATAGTGATATAATAATGTGGAAAAAAAGATAATAAATAATATATATTATAATTAAAATAGGAAAATAAAAAATATATATATAAATTGTGATATAACAACGTTTGATAAAAAAAAAATAATAGATAATATATATTATAATTGAAATAGCCTCGAATGTACGGG
CmoSSR01086	p6	(CTCTTC)4	Cmo_Chr01	9633825..9634854	CAATTTCAAAAAGGTGCGGT	59.97	CGCTGAAAGTCGAGACGATT	60.54	CAATTTCAAAAAGGTGCGGTTTCATCTCTCTTTAATCATTATTCTCAAGATATTGCTGGAAGCAATCGGACGCACTCGCGTGACGATGGAGGCCGTGCCCAATCTAATGCTCTTCCTCTTCCTCTTCCTCTTCCTTTCAATCGTCTCGACTTTCAGCG
CmoSSR01087	p6	(AGAAGG)4	Cmo_Chr01	9646652..9647681	TCAATCAACAAGGTCCCAAA	58.95	TCTATCTTTTGCGGGTCGAG	60.34	TCAATCAACAAGGTCCCAAATTTTAGGACTCTGTTTGGATTAACTACTTAGAGTTCATAATTAAAATTTTATTGGTTAAATCTTATACAAACCGATAAGATACAAAATGGATCTTGTTCTATCATTGATCAGAGATTTCTCTATGAACAATACGAATGGGAGTTTGAAGAAGGAGAAGGAGAAGGAGAAGGAGTCCTCGACCCGCAAAAGATAGA
CmoSSR01088	p8	(TTTTTAAT)3	Cmo_Chr01	9665017..9666046	TGCCTCAAAATGTACCGTAGG	60	TGATAGCTCTTATTTTCAACCTGC	59.01	TGCCTCAAAATGTACCGTAGGAGATGTAACTAGTTGTCAATTTTTAATTTTTTAAATTTTTAATTTTTTAATTTTTTAATTTTATATTTAATATGTTTTGGATTATTAGACTGCTTTAAAAATTCTTAAATTTATTAAACACAAAATTAAGCAGGTTGAAAATAAGAGCTATCA
CmoSSR01089	p2	(TA)25	Cmo_Chr01	9674979..9676034	TCGAAGAATCTAGAAGAGCGG	58.82	CATCTTTGTCTTATTTCTTGTCCG	59.22	TCGAAGAATCTAGAAGAGCGGATCATGAATTTTTAAAAGTTTTAGAAAGCGTTACGAGCATCTTTACAACTAAACGAGACAAATTATATATATATATATATATATATATATATATATATATATATATATATATATGGGTTTATTTAGAGCAAATGTAATTATTTTATTTTCCAAGAATTTAAATTTTGTAGCTAAATTTGATATTTCTAAGCCTTAAACGACGTCGTTTATAAACGGACAAGAAATAAGACAAAGATG
CmoSSR01090	p2	(AT)20	Cmo_Chr01	9685310..9686355	TCGCGACAGTTAAAAGAATCG	60.38	ATTTTGGGTTCATGGGACAA	60.03	TCGCGACAGTTAAAAGAATCGTAAACTATTAGAATATATATATATATATATATATATATATATATATATATATAAATTGTGATATAATAATGTTGTAACAAATGGATAATACTCGGGTATAAGTGTTTTAAGTTAGGACAAAATATCACTTTGACAAACCTATCATTAATGTAAATTTATTAGTTTTTATATATTTTTATTTGACTTGGGTGAATTCGAGGGTTTTGTCCCATGAACCCAAAAT
CmoSSR01091	p8	(AAAAATAA)3	Cmo_Chr01	9692632..9693661	CAACCGACTCAGACAAGCAA	60.02	AATGCTCTGCAATTGTGACG	59.87	CAACCGACTCAGACAAGCAAAACTAGGATATTTGTCATGGGACGAAGAAAGCTTCCAAACCTCGTCTTACCTCGTGGATATGTCTAGTTCGAACGAAGGAGACTATGTAAGAATAATAATGTAAATGTATGAAATTTATATACAAGCTTTATGGTTTATGGTTTATGTAATTATACATTTTAAAATTACGACTAAAAAAAAGGAATTAAACCCAAAAATAAAAAAATAAAAAAATAAAAAAAAATAAAAAGAAAAAACCAGAAAATATAAACAACGTCACAATTGCAGAGCATT
CmoSSR01092	p2	(GT)12	Cmo_Chr01	9693229..9694258	ATTTTTCAGCGTTCGGTGTC	60.12	GGAAAAGAACGCACGACAGT	60.3	ATTTTTCAGCGTTCGGTGTCGTCCTTGTCTCAATCTAGAACTTCTAATGGCCTCCTCTTACTGGTGTGTGTGTGTGTGTGTGTGTGTTTTTCTTGTTTGAAACCACTGTCGTGCGTTCTTTTCC
CmoSSR01093	p7	(AAGAAAC)3	Cmo_Chr01	9701173..9702199	TGGTTGGAACATTGGTTGAA	59.79	GCTTGGGCTGTTACATTCCT	59.2	TGGTTGGAACATTGGTTGAACACATCTGTTGTCAACTTCCACATGTTCAACCCACATGACCTAAACAAAATATTCAAACAACAGCCCTAAATTATCAAGTGATTTTGTAAGAAGAAGAAGCAATGAAACGTCATTTTAACGAGGAATAAGAAACAAGAAACAAGAAACAACAGGTACTTAACACGGGTTTTTCTTTTCATAAAAGAGAAACAAGAATGAAAAAAAAAACGAAGAATAAGACACGAGAAATAACATGTTCCAGAAAACGTGGAATAGGAATGTAACAGCCCAAGC
CmoSSR01094	p7	(AAAAAAC)3	Cmo_Chr01	9705150..9706176	TGTAACAACATCAAAGCGGG	59.58	GTATTCTCCGGTCAGGCAAA	60.07	TGTAACAACATCAAAGCGGGTTTAAAAAATTAGGGTTTTGATCAAAATCAAACCAAGATTTTACCTTCACAATCCCTTGAACCTTGAATTTCTTGCAGTAAATCCTGCAAAAGATCAAAATCAACTCAAGAACAAAGATCAAAAAAACAAAAAACAAAAAACAAAAAAACACAATACCCTTTGAGAATTATGGATCGAAATGGGTATATTGTGAGTGAATGAAGAAGGTGTTAATATATATATAGTGAAAAAAATGCCTCGTGGTTTTTGCCTGACCGGAGAATAC
CmoSSR01095	p2	(AT)32	Cmo_Chr01	9705518..9706587	AAACGCTTCTCTTCGGGATT	60.21	CCCACAAGATCCCGTTTTTA	59.79	AAACGCTTCTCTTCGGGATTCTTCACTCTTTCTTCCTGACTTCAAAACTCTTACGTGGCACTTTCCTTTATCAAACTATAATATATATATATATATATATATATATATATATATATATATATATATATATATATATATATATATTTTAATTCAATCACCGTAAAATTTAAAATATAATTAACAAACTTATATACTGATTTATCTCTATATCTTATAAATAATTAATTAATTTCTTTTTGGAGATTTTATTTTCATTTTAGATTGGGTTTTAAAAACGGGATCTTGTGGG
CmoSSR01096	p3	(AAT)7	Cmo_Chr01	9706785..9707811	TTCATCACTCTTTACACATCATGC	59.16	TGAAAGCATTTTCCAAACCC	59.92	TTCATCACTCTTTACACATCATGCTGAATTAGAACAAAATAATAATAATAATAATAATAAAATCAATTTATGATAAATATTAAAATATTATACGGGTTTGGAAAATGCTTTCA
CmoSSR01097	p3	(TAA)8	Cmo_Chr01	9707684..9708713	GCATCTGATGACGTGGAAAA	59.65	GTGTCGTACCTGCTGACGAG	59.49	GCATCTGATGACGTGGAAAAGTTAGTTAATTATGTTCTAAATTTTATTTTTTAAAAAACAACATTCATTATAAATTGATTTAGAGAAAAAAATAATTATGTTTTGTTTTTTAACCTTTGACAATGAAAGTCACTAATTTAATAATAATAATAATAATAATAATTTTTAAATTTCCTCGTCAGCAGGTACGACAC
CmoSSR01098	p5	(TTTTC)4	Cmo_Chr01	9718887..9719912	TTGACAGCCACAGTCAAAGAA	59.47	CCATTGGAAGATCTTGCTGC	60.74	TTGACAGCCACAGTCAAAGAACAGAACACCATTCTTCTTGATACTCGTTCATTCTGATTTATTTCGTTTTTGTTTTCTTTTTCTTTTCTTTTCTTTTCCTTTTTTTTTAAGAAAAAAAAAACAAATACGATCACAACTAAATCCTGAATGCATACAACAATCATTATAGGGTTACCTGAGTTCTGAGCTTAAATTCTGCAGCAAGATCTTCCAATGG
CmoSSR01099	p4	(AAAT)5	Cmo_Chr01	9787505..9788530	AACCCTTTGTGGAGTTGGTG	59.86	GGTGTGTTTGGTGGACAATTC	60.13	AACCCTTTGTGGAGTTGGTGAAAAGATAATATCCTATAAAAATAAATAAATAAATAAATAGACAATAATATTAATTAAGATTATGAGAAAATTAAGTAATGGTAACACTAATTAAGAAGGGGTTAGGGAAAGTGAAGTGGTTGTTGATTTTGGTAGTTAATGGTTTTGGAAATTTTGATGAATTGTCCACCAAACACACC
CmoSSR01100	p7	(ATTTTAA)3	Cmo_Chr01	9809154..9810180	AAAATTGATTGGGCTTTCCC	60.13	TGTCTTCCCATCTAGACCCG	60.07	AAAATTGATTGGGCTTTCCCAAGTGATAGATGTGGCCCAAAAAACCTACATTTGGGCTTGGCTTGCTTGCAAATGCTCTCTCCCTACTTATTTGTTGTATTTTAAATTTTAAATTTTAAAGGGTTTAAAAGCTTTGTTGTATTTTATGTTAAAATTCACATTTTATAATTTATCCTATTTTAAAGTCCTATGCTTACACCATAAGTTATTCGAGAAAAAAAAAAAACTAAAATCAGCTGTGGTACTAGCGGGTCTAGATGGGAAGACA
CmoSSR01101	p3	(TAA)8	Cmo_Chr01	9816977..9818006	GACGGTAAAATCAGCCGGTA	59.96	CCGGTGAGTTTTATGGTTGG	60.22	GACGGTAAAATCAGCCGGTAAATTTAACAAAAAATTGAACAGATAAAAAAAAGAAAAGAAATTATAACGTGTTGAAATATAAATTGTTGTTTTCTATTAATAATAATAATAATAATAATAAAGGGTTTAAAACGAACTGAACCAACCATAAAACTCACCGG
CmoSSR01102	p2	(TA)9	Cmo_Chr01	9826187..9827210	TCCTAAAAGTACGTAAGAGTGCAA	57.46	CCACGAGAGTGTGGTGTTTG	60.19	TCCTAAAAGTACGTAAGAGTGCAACTCTAGATGTACACTGAAGTGACATATAATTAATAAACAAAAATTAATTAATTAAACTGTTTATTTATTTATTTTATACCTCAAATATTAAAATAAGTTATATATATATATATATATCGAGATAATGATATTTAAATATGAATAAAATATTATAATATATCTCGACACGAATAAAATGCTTCACTGTACCTTAATTCTCGCTGCTAACTTCACCATTAAAACGGGTGACAAACACCACACTCTCGTGG
CmoSSR01103	p2	(CT)9	Cmo_Chr01	9847063..9848086	GGGTCCACGTGAAATAGGAA	59.79	TGTGACGTGGAGGAGATGAG	59.82	GGGTCCACGTGAAATAGGAAAGTGTGTGGGTAATGAGGTGGGCCCCACAAGTCTGAATTTCAATTTCGGAATTTAAAATTCCCGGTTTTATTAAGTCTCTTTCTTTTATCCTCCACACATTCCTCTCTCTCTCTCTCTCTTTCCGCCACGTATTTATTCCAAATATTCTCGTGGCACCGAATCCTCCTTTACCCCTTCTTCATATCTCCACCTCACCATTCCAGATTTTCTCCAATCTCATCTCCTCCACGTCACA
CmoSSR01104	p2	(AG)9	Cmo_Chr01	9847821..9848844	AAACAGAATGATTGCGGGAC	59.94	ATGAACATTTGCCACGTGAA	59.97	AAACAGAATGATTGCGGGACAACTGGGAAGGGCAGTAATCTGGTGAAACGCTAGACCAGTTGCCACGTAGGCGTACGGAGATGGCGTTAGAGAGAGAGAGAGAGAGTTCAGGTGGTTTCACGTGGCAAATGTTCAT
CmoSSR01105	p3	(GAG)7	Cmo_Chr01	9848906..9849932	GCTTACGCCTACGGTTTCTG	59.9	GAACCACCTGGTTTTCTCCA	59.94	GCTTACGCCTACGGTTTCTGTGTGTGAGGGATGTGTTGAAGTCCATTGTGGTAAATGGGAGCAAGGTGGATTTCAAGAGCGCCGTAGAGATAACGAGGTGGAAGTTAATGGTGGTGATGATTTTGACGATGGTGAAGGTTTCGGGAGTTATGAGGGAGGTGATAGTGAGGATGCTGATGAGGATGACGATGAGGAGGAGGAGGAGGAGGAGGAAGCAGAAGAGGATGAAGATGGAGAAAACCAGGTGGTTC
CmoSSR01106	p5	(TTATT)4	Cmo_Chr01	9852527..9853552	TAAACGGAAACATTTGTGGG	58.39	ATCCCAATACCGGCTAATCC	60.01	TAAACGGAAACATTTGTGGGCAAATATTTATTATTATTTTTTATTATGTATTTTGAGACTTATTTAAAAAATAATAATTTAACAAAAAGATTGAAATATTGGACATGAATTAAAAATTAAAATATTATTGAGTTGTAACATATGGGCAAATCATTATTTTATTTTATTTTATTTATTTATTTAAAAAGAAAAAGTAGGATTAGCCGGTATTGGGAT
CmoSSR01107	p2	(AT)11	Cmo_Chr01	9852687..9853714	GGATTAGCCGGTATTGGGAT	60.01	AAGCAAAATCCAAGCCTCAA	59.82	GGATTAGCCGGTATTGGGATGGGATAAGGGGACCAAAGGATAAAGTTATGGGTCAAAAATTGGATACCCCAAAGTCCTAACTTATCACATCCCATAAATTTCAATCAATTTAACTTCATATATATATATATATATATATAAACCCTAAAGCCTTGAGGCTTGGATTTTGCTT
CmoSSR01108	p2	(AT)17	Cmo_Chr01	9856131..9857170	TCATCCACAACAGTGCTTCTCT	59.91	GAAATTATCGTTTGGCAGGAA	59.07	TCATCCACAACAGTGCTTCTCTAAATTTAGCTTAAACCAATACAAATGTTTAAATTGACCAGAAGGAATTAAAGATAAATCAATATATATATATATATATATATATATATATATATAACACGTATATCTACACCTATGCATTAGAATGCAATAAATAAATATTCAACTAAAATTTTATACTATCTAAATTTCAAATAAATTTCCTGCCAAACGATAATTTC
CmoSSR01109	p2	(AT)21	Cmo_Chr01	9859812..9860859	AATCACGGGCCTCTCCTAAT	59.92	TAAAATTGCATGATCGGGGT	60.15	AATCACGGGCCTCTCCTAATTTATGGGCCCATGTTTTTTGAGAATATATATATATATATATATATATATATATATATATATATATTTTTTTTTTTTTTTTTTTTTAACTTTTTACTTTTTTTTATGTTATTTTTAAAATGGCACTTAATATCAGGTTTTTTTTCTTTCTTGAAATAATTGATTTTTTATGTATATATTACATTAAAAATAATTATGTTGGTTTGAACCCCGATCATGCAATTTTA
CmoSSR01110	p3	(GGC)7	Cmo_Chr01	9865746..9866772	TCCTCGTCATCGGGACTATC	60.03	TCCCTCGATCAAGATTCACC	60.01	TCCTCGTCATCGGGACTATCAACAGCGGTATTCAGAGAAATGTCGATGGAGCCCCAATCAGCGCCGAAGAGTACAGAGGTAGGGCTGACGTGGAGAAGAATAACAGCATCACCGGGGCGAAGGTAGTGTTGAACAGCCCAGCGGACGGCAAAAGCACTCTCTTCAGAAAGGTCAACAGCGACGCCAATCTTGCGTCGGGCGCCACCAGTAGGGGTGGAATTGGCGGCGGCGGCGGCGGCGGCGGAGGGGTGACGAGGGGAGGCCGGATGGTGAATCTTGATCGAGGGA
CmoSSR01111	p2	(TA)9	Cmo_Chr01	9870566..9871589	GGTTTCACCGTTAAAAGCCA	59.97	AATTTTAGAAGCGGTGCAGAA	59.02	GGTTTCACCGTTAAAAGCCATTAGACTAATAATCGTAGTGTTTTATTTCTCGTGGACACACAATTTTTTAAACACTAAAATAGATTATTGGCTATTGTTTTATAAAGGCTAAATTATACATTAAAATATAGCATTAACTTTACAAATATTTATAAAACATAAGAAAATAAGATAACAAAATTAAAATTAATTATTAATTTAAAAAAATAAAAAATTGATACACTCCTAAAATTAAAATTTCAATATTAATGTTGTTATATATATATATATATAAATTATTCTGCACCGCTTCTAAAATT
CmoSSR01112	p2	(GA)9	Cmo_Chr01	9906802..9907825	TCCCCTCTCACTCTGTTCGT	59.83	TGGGAGTCTACAGCTCCACC	60.26	TCCCCTCTCACTCTGTTCGTTAAAACCCAAAAAAATTATGTAAAAGAAAGAAGAGGAGAGAGAGAGAGAGAGAGGAGAGAGAGAGGTATAAGAGAGAGAAGTTGATGAATGTTTTGGTTTTTGTTGTTGTTGTTGCTTGAAGCTTTTTGTTTTGAAAAGAAATTTCAAAATTTGTTTCGGGCAGGTGGAGCTGTAGACTCCCA
CmoSSR01113	p4	(AAAT)5	Cmo_Chr01	9909374..9910399	TCTAGCGATCTCCAACTGGC	60.5	CCCACAATCATCATCCCTTT	59.61	TCTAGCGATCTCCAACTGGCAATTTAATTTCCTTTCATCACGTCTGATTATTAGCTAAGGTAAAGTGAAGTTGGCGTTGATTAAGGAGTTATTTGTCCAAATAAAAAATAAATAACTAAATCAAATAACTCATGAAATTCAGAAATAAATAAATAAATAAATATAAAGCTAGGAAGGACCATTTTGTGAAAGAAAGGGATGATGATTGTGGG
CmoSSR01114	p3	(ATT)7	Cmo_Chr01	9913236..9914262	CCCAAGTCTTTTGCTTTCTTTT	58.97	GCCAACTGCCGTCAATAACT	60.14	CCCAAGTCTTTTGCTTTCTTTTTCAGACAAAACTGAGGAAATCTCTGTATTTCTGTACTCTGTTTCACGTTTCTTGTTGATTTTCTTTTTCTTTTTTTCTCAGACATTCTTTGTCGGATTATTATTATTATTATTATTCAATTTTTTTTAAATGAAATTAATATTAATTTCATAAAGAGTTCAAAGGTCTTTTTTAGGGCAAGAAACTTCTGGATGTTTCTTTAACAATAATATCTCATGTAGTTATTGACGGCAGTTGGC
CmoSSR01115	p3	(GAG)7	Cmo_Chr01	9955805..9956831	GTGACGTTGGCCTTCTCATT	60.12	GTTTTGGGGGTAGCCACTTT	60.22	GTGACGTTGGCCTTCTCATTCATGGTGGGAACGGGGAGAGGGCGGAAGAGAGAGGAGGAAGAGGAGGAGGAGGAGGAGGAGGAAGAAGAAGCAGCAGCCGGACACGGAGGTCAGAACGGTCTTTCAACACGGTTTTCTCTCTCCTCTCTTTCTCTTTCTCGTTCTCTCTCTAGAATGCCCCTTTCTTTGTTGCGTTTAGTTTCTCTCTCTAGCCCTTCGTCTCGTCTTCTGATTATTATTTTGAGACCCAAAAGGAAAGACGGAGGAGGGAAAATAAAGTGGCTACCCCCAAAAC
CmoSSR01116	p2	(AT)13	Cmo_Chr01	9960024..9961055	CGTGATTTCATCCCTCGATT	59.89	TTGCTCTGGTTTGATGTTGC	59.85	CGTGATTTCATCCCTCGATTCTTATATTATTAAACACGTAAATCGGTAAGATCTTTGTTTCTCCATACACATAATTTTCAGAACAAAATCTCATATATATATATATATATATATATATAAATCAAATCATATGATCCTTGAAAGGGTTGTTTGTTATGGGAAAACCAATCGTTTTTCTTAGGGGAAAACGATTTGCAAAACCCAAAAAGAACAGCATTTAAGTTCTTCATCCACCATTAAAGAAACAGCAACATCAAACCAGAGCAA
CmoSSR01117	p3	(GAA)7	Cmo_Chr01	9960206..9961232	GCAACATCAAACCAGAGCAA	59.85	GCGGACACTCTGAGCTTACC	60.02	GCAACATCAAACCAGAGCAAAGAAGAGGAAGAAGAAGAAGAAGAAGAATTAGGGTTGAAATGAGAGAAAAAGGTAAATGGGGATTGCTTGAAGAAGAAGAAGTGAAGAAAATGGGAGGGTTCGTTCAAGGATCGGATTTCATAGAGGTCCATTGCGGCTGCACCAGCAAGAAATACGGCGATTCCCCTGGTAAGCTCAGAGTGTCCGC
CmoSSR01118	p2	(AT)13	Cmo_Chr01	9975320..9976351	AACTCAGCCGAATCTACGGA	59.84	TGTCACACCTTCTATCCTCCAA	59.59	AACTCAGCCGAATCTACGGACACTTTAAAATATGTGTCATAAATTTTAATTAGTCCTCGTCAAACTCTTTTTTCTCTTATAATTTTTTCAATTTTTTAAAATTTATGAATTTACTAATATTAAAAGTTGAGTAACTATATAAAATATATATATATATATATATATATATTTAATGATTAAATTTGTAATTTGATAGATAAAAAAAAATAGAAATAAAAACCAATTAAATACGGACAGTTGGAGGATAGAAGGTGTGACA
CmoSSR01119	p2	(TA)14	Cmo_Chr01	9978540..9979573	CTGCTTGGCTTGAGAGGAAT	59.57	TTTCTTTTTCGGGATCGTTG	60.05	CTGCTTGGCTTGAGAGGAATGGCTTCCTAGAATAAAGACACATTAAAGGACTATATATATATATATATATATATATATATTTATTTATTTATTTTAAATTGTGTGGTTGAGAAAAATAACGCATGGCATTTTAAAAAATAAAATCGTAAAAAGAAAATAGGAATTTGGTGCACCAGCAAGCACTGCTCGGCTGGCAACGATCCCGAAAAAGAAA
CmoSSR01120	p7	(TTTTTTC)3	Cmo_Chr01	9987430..9988456	CACGAAAGGATAGAACCGGA	60.07	ATTGGTCGGGTTGTCGAATA	60.19	CACGAAAGGATAGAACCGGAAGGATCCGGTTGGTCGCTTTCCCGAATTTTGCGGGCCCACTTTCTTTCTCTTTGCTTTGACCAATGCTACTCAGACTGGGACCCACACGTTGTTCGTGTAAACAAATACTTTCCTTCTGTATTCCATTTCTTCCTTATTCATTCTATTTTTTCTTTTTTCTTTTTTCTTTTTTAACTATAAATCACCTCATTTTAAAACTTTTACTTATTATTATTTTTTTATATTTTAAATTTTGTATTCGACAACCCGACCAAT
CmoSSR01121	p5	(TAAAA)4	Cmo_Chr01	9988382..9989407	TGGGTTAAATTAAAGTGGTTGG	57.98	TGTTCATTCCATTTGTAACGG	58.4	TGGGTTAAATTAAAGTGGTTGGTCATTGAACTTTTTAAAATAAAATAAAATAAAAATGAATCGATTTAATTTCAAACCATTGATTAGATTTTAAAGTTTAAAATGATTTTGATTTGATTGATTAAGTAACCTGGTTAACCGTTACAAATGGAATGAACA
CmoSSR01122	p4	(AAAT)5	Cmo_Chr01	9988981..9990006	CATGAATAATCGGTGGAGCA	59.5	TGTTTCGTTACCTTCGACTGAG	59.42	CATGAATAATCGGTGGAGCAATGAAATTACGAAAATAACCCTGAAAACTAAGTGAGGGGTATAATGGTGAAAAGGATTGCTTAAAGAAGCAAAAAACAAAAGAAAAAAAAACCATTTGACTTAGAGAATGATGACAAAGGAGTAATAAGGTAAGGCATGCAAATGAAATTAGAGTTAAAAATTATTTAAACAACCAATAAAATAAATAAATAAATAAATAAAAACTCCCCTACATGAGGTGGATTTAACGAGATAAAATCTCAGTCGAAGGTAACGAAACA
CmoSSR01123	p4	(AAAT)6	Cmo_Chr01	9992242..9993271	GGAAGGGAATATAGGTGGAAAGA	59.7	TGAATTAAATGGCCCCACTC	59.76	GGAAGGGAATATAGGTGGAAAGAAGTTGATATTTATAGAAATAAATAAATAAATAAATAAATATAAATATTTATTTATTTATATTTATTTATTTATAATAAATGTGAGGGAGAGTTGGGGGATATTGTAAAATCACTATCCTATAATTTTAATGGGGAAATATATATTGGTGGAAAATGAGTGGGGCCATTTAATTCA
CmoSSR01124	p2	(AT)9	Cmo_Chr01	10012208..10013231	CTAGCGTCCGATCACCTCAT	60.24	CAAAAATGGGTTGCATGAAT	58.33	CTAGCGTCCGATCACCTCATCAATTCAAGAAAAAAGCTGTAATTCATATGTAAGAATTTTTTGTTTTTATCGACCGTCAGATATAGATAACGATGATTAAAATTGATATACCAATCCTTTTGAATTATTGAATGAATTAAAGCTTATCGAATCTACCCATCCATAAAGAAAATAAAGAAAATGTAATTTCATTAAATATATATATATATATATTTTGGAAAGTTAAAAATTATATTGATTTGTTTTTTTTTTTTAATTAATATGTTAATTCATGCAACCCATTTTTG
CmoSSR01125	p2	(AT)10	Cmo_Chr01	10015195..10016220	TCTCCTTCTCCACCCGTTTA	59.66	TACGCATGCCTTTACGTCAG	59.9	TCTCCTTCTCCACCCGTTTAATATAAATACACACATATATATATATATATATATTTTTGTATGTACGCGTACCTATGTGAAAAAAAACTGAGGCATGTAATATAAATACACACATATTTATATATATATATATATGTATGTATGTATGTATGTATGTATGTATAAAAAAAACTGACGTAAAGGCATGCGTA
CmoSSR01126	p4	(TATG)7	Cmo_Chr01	10015293..10016326	TCTCCTTCTCCACCCGTTTA	59.66	TACGCATGCCTTTACGTCAG	59.9	TCTCCTTCTCCACCCGTTTAATATAAATACACACATATATATATATATATATATTTTTGTATGTACGCGTACCTATGTGAAAAAAAACTGAGGCATGTAATATAAATACACACATATTTATATATATATATATATGTATGTATGTATGTATGTATGTATGTATAAAAAAAACTGACGTAAAGGCATGCGTA
CmoSSR01127	p3	(TTA)9	Cmo_Chr01	10016074..10017106	GGCGACAAAGAGGATGAAAC	59.68	AAGAAGGGTTAGGTGGGTGG	60.22	GGCGACAAAGAGGATGAAACAAAATCATTTAGAGCCAAAGAAGTTGACCAACCAAATCAAAGAATAAACTTTTTGAATTAATTGCACCCAGAAATTTCTGTGATTATAATGAAACAGTGTTTGGCATCTCCAAAACTTATTATTATTATTATTATTATTATTATCATTTTTTCTCTCTTATTATCAAAATTTCCACCCACCTAACCCTTCTT
CmoSSR01128	p3	(TTA)8	Cmo_Chr01	10036833..10037862	CTCGGGATGATTATGCGATT	59.88	GGGTTGAATTGAGCGACTCT	59.29	CTCGGGATGATTATGCGATTTGATTCTACAGTTTCACTTTTTAATATTCACGATCCAAAGAACCACCAATGGATTAACAATAGCTTTACCATAATATCTTTGAGCGTTCTTTATTATTATTATTATTATTATTATTTTAAATTTGAGCTAAAACGATTCATGTCTCGAACACTCTACTGATCCAACTCAATATGTACCGTTTAAGTTGACTTATAAACTTATTTTAGTTAGATTATTTTTACTTATTATAGTTGGATTTAATTATATTCCTTATCTAAGTAGAGTCGCTCAATTCAACCC
CmoSSR01129	p5	(TTGGG)4	Cmo_Chr01	10046112..10047137	TTTTGTTGCAGGGGAAGTCT	59.71	CCCCAATTCAGCTTGACTGT	60.11	TTTTGTTGCAGGGGAAGTCTACTGTTTGCTTGAAGGATTCTAGTTTCTTTGGAATTTCATTCTCAGACCATCTCAAATCTGAATTCAGTTCATCTGCATTGAGGTGTAAGGTAATGGGTGTTTCTAAATTTGTGTTATTTGGCCTCTGTTTACTTTAGAAATGCTGTGTGTTTCTGTTGATATGTCTTGGATTTTTGGGTTGGGTTGGGTTGGGTTGGTCTGGTTTCACTTACAGTCAAGCTGAATTGGGG
CmoSSR01130	p2	(AG)16	Cmo_Chr01	10052043..10053080	GCTTCACTTCTCCATCTGCC	59.96	TAGATGGCAGCTTTGCCTTT	59.98	GCTTCACTTCTCCATCTGCCCCCTGTTTATGACCCATGATACCATACTTCTTTTTAATACCAAATTAATTGCTCATTTTAAGAGAGAGAGAGAGAGAGAGAGAGAGAGAGAGTGTACCAAGGCAGCAAAAACAGCCCCAGCCCTTCTGTCATAAACAACAAAGGCAAAGCTGCCATCTA
CmoSSR01131	p3	(TTA)14	Cmo_Chr01	10055235..10056282	GAGGTACGGACCACCTCTCA	60.11	AGGCTGGGAGAAGGAGAAAA	60.32	GAGGTACGGACCACCTCTCACAGTTCTTTGTTTATTATTATTATTATTATTATTATTATTATTATTATTATTATTTTCTCTTTTCAACCACGTGTCTCTCTTCCTTTTTCTCCTTCTCCCAGCCT
CmoSSR01132	p7	(CACATAG)3	Cmo_Chr01	10056173..10057199	TTGACGACATTTTGTTCGGA	60.09	TGAGGCCAACACAATACCAA	59.96	TTGACGACATTTTGTTCGGATATGTGATAAGGTTAAGGTTAAAACCTTTTTACAGCAAACACGAGAATTAGTAAACAATCAAATTATGGTAAGTTGAAATTTTGATTCTCTGTCACACATAGCACATAGCACATAGCACATGCATGCATGAATAATTGAGATGAAAACAGGATTAAAGCTTTTTTTAGTATGTAGAAATGGACAACCAAATAAAGAAATTGCAGTAAGTTTGGTATTGTGTTGGCCTCA
CmoSSR01133	p3	(AAT)11	Cmo_Chr01	10057898..10058936	TGCGTAAACACGACAAGAGG	59.9	TGAAAGTTGGGGACCATTTT	59.26	TGCGTAAACACGACAAGAGGACAGATCGAGTGCTATTATCAAATCAAAGGACTAAAACCGACAAAAAAATAATAATAATAATAATAATAATAATAATAATTTGTTATAAAAAATGGTCCCCAACTTTCA
[truncated: 27,061 more rows]

## Sheet: Table S5
Table S5. The identificated SSR markers in C. maxima
Primer ID	SSR type	SSR motif	Chromosome	Physical position	Forward	Tm	Reverse	Tm	Expected_Sequence
[truncated: 28,061 more rows]

## Sheet: Table S6
Table S6. The identificated SSR markers in C. pepo
[truncated: 34,996 more rows]

## Sheet: Table S7
Table S7. List of cross-speices SSR markers between C. pepo and C. sativus identified by in silico PCR
[truncated: 392 more rows]

[truncated: 6 more sheets: Table S8, Table S9, Table S10, Table S11, Table S12, Table S13]
